# Supplementary material
Source: PubMed Central journal article supplement (PMC11546168)
Supplement: NIHMS1990334-supplement-Supplementary_Methods__Figs__1_75_and_Tables_1_4.pdf [file NIHMS1990334-supplement-Supplementary_Methods__Figs__1_75_and_Tables_1_4.pdf]

# Elucidating electron-transfer events in polypyridine nickel complexes for reductive coupling reactions

---

In the format provided by the authors and unedited

---

Contents

|                                                                                            |            |
|--------------------------------------------------------------------------------------------|------------|
| <b>Supplementary Methods</b> .....                                                         | <b>2</b>   |
| General Considerations.....                                                                | 2          |
| Synthesis and Characterization of Complexes .....                                          | 3          |
| Synthesis of (L4)Ni(OPiv) <sub>2</sub> .....                                               | 3          |
| Synthesis of (L4)Ni(OCOPh) <sub>2</sub> .....                                              | 3          |
| Synthesis of [(L4)Ni(OPh) <sub>2</sub> ] <sub>2</sub> .....                                | 4          |
| Synthesis of NiLi <sub>3</sub> Cl <sub>2</sub> (O <sup>t</sup> Bu) <sub>3</sub> •2THF..... | 4          |
| Synthesis of [(L4) <sub>2</sub> Ni]Cl.....                                                 | 4          |
| Synthesis of [(L4) <sub>2</sub> Ni]Br.....                                                 | 5          |
| Synthesis of (L3)Ni(OPiv) <sub>2</sub> .....                                               | 6          |
| Stoichiometric Reactions.....                                                              | 7          |
| No reaction between (L4)Ni(OPiv) <sub>2</sub> and (L4) <sub>2</sub> Ni.....                | 7          |
| No reaction between (L4)Ni(OCOPh) <sub>2</sub> and (L4) <sub>2</sub> Ni .....              | 9          |
| No reaction between [(L4)Ni(OPh) <sub>2</sub> ] <sub>2</sub> and (L4) <sub>2</sub> Ni..... | 10         |
| No reaction between (L3)Ni(OPiv) <sub>2</sub> and (L3) <sub>2</sub> Ni.....                | 11         |
| Reaction between (L4)NiBr <sub>2</sub> and (L4) <sub>2</sub> Ni .....                      | 13         |
| Reaction between [(L4) <sub>2</sub> Ni]Cl and potassium pivalate in THF.....               | 15         |
| Reaction between [(L4) <sub>2</sub> Ni]Cl and potassium pivalate in MeCN .....             | 17         |
| Reaction between [(L4) <sub>2</sub> Ni]Cl and potassium benzoate.....                      | 18         |
| Reaction between [(L4) <sub>2</sub> Ni]Cl and sodium phenoxide.....                        | 19         |
| Reaction between [(L3) <sub>2</sub> Ni]Cl and potassium pivalate .....                     | 20         |
| Solubility of Ni(II) complexes.....                                                        | 21         |
| Reaction between (L4)NiBr <sub>2</sub> and zinc .....                                      | 22         |
| Reaction between (L4)NiBr <sub>2</sub> and manganese.....                                  | 22         |
| No reaction between (L4)Ni(OPiv) <sub>2</sub> and Zn.....                                  | 23         |
| No reaction between (L4)Ni(OPiv) <sub>2</sub> and Mn.....                                  | 24         |
| Reaction between (L4)Ni(OPiv) <sub>2</sub> and LiBr .....                                  | 25         |
| Reaction between (L4)Ni(OPiv) <sub>2</sub> , Zinc and LiBr.....                            | 25         |
| Reaction between (L4)Ni(OPiv) <sub>2</sub> , Zinc and ZnBr <sub>2</sub> .....              | 26         |
| Reaction between (L4) <sub>2</sub> Ni and Zinc Chloride .....                              | 27         |
| Reaction between (L4) <sub>2</sub> Ni and Manganese Chloride .....                         | 28         |
| Catalytic reactions .....                                                                  | 30         |
| Migratory reductive coupling of aryl and alkyl bromides using L4.....                      | 30         |
| Catalytic carboxylation of allylic alcohols with CO <sub>2</sub> using L4 .....            | 32         |
| Catalytic carboxylation of dienes with CO <sub>2</sub> using L5 and L6 .....               | 33         |
| Reductive Coupling of Aryl and Alkyl Bromides Using dtbbpy .....                           | 34         |
| Reductive Coupling of Aryl Bromides and Alkyl Tosylates Using dtbbpy .....                 | 35         |
| IR, UV-VIS, and Cyclic Voltammetry .....                                                   | 36         |
| Infrared Spectroscopy .....                                                                | 36         |
| UV-VIS Spectroscopy .....                                                                  | 37         |
| Cyclic Voltammetry.....                                                                    | 38         |
| NMR and EPR Spectra of Synthesized Complexes .....                                         | 43         |
| Crystallographic Data .....                                                                | 46         |
| Computational details .....                                                                | 54         |
| <b>Supplementary References</b> .....                                                      | <b>164</b> |

## Supplementary Methods

### General Considerations

**Solvents.** Reactions were carried out under N<sub>2</sub> in a glovebox or on a Schlenk line, in solvents (THF, Et<sub>2</sub>O, toluene) that had been dried and degassed using an Innovative Technologies solvent purification system, then stored under N<sub>2</sub> over 4 Å molecular sieves for at least 16 h prior to use. Pentane was degassed by bubbling with N<sub>2</sub> and stored under N<sub>2</sub> over 4 Å molecular sieves for at least 16 h prior to use. C<sub>6</sub>D<sub>6</sub>, C<sub>7</sub>D<sub>8</sub>, THF-*d*<sub>8</sub>, (Eurisotop) were freeze/pump/thaw degassed (4x) and likewise stored under N<sub>2</sub> over 4 Å molecular sieves for at least 16 h prior to use.

**Reagents.** Neocuproine and bathocuproine were purchased from Fluorochem. Zinc dichloride (ZnCl<sub>2</sub>), and sodium phenoxide, lithium tert-butoxide, and manganese dichloride were purchased from Sigma-Aldrich. Potassium benzoate was purchased from Thermo Fisher. ZnBr<sub>2</sub> and potassium pivalate (KOPiv) were purchased from Alfa Aesar. [Ni(COD)<sub>2</sub>] was purchased from Strem Chemicals. Trimethoxybenzene (TMB) was purchased from TCI Chemicals. Salts ZnBr<sub>2</sub>, ZnCl<sub>2</sub>, and KOPiv were dried at 150 °C under high vacuum overnight. Complexes (bipy)NiCl<sub>2</sub>,<sup>1</sup> (bipy)NiBr<sub>2</sub>,<sup>1</sup> (phen)NiCl<sub>2</sub>,<sup>1</sup> (neocuproine)NiCl<sub>2</sub>,<sup>2</sup> (bathocuproine)NiCl<sub>2</sub>,<sup>2</sup> (neocuproine)<sub>2</sub>Ni,<sup>2</sup> (bathocuproine)<sub>2</sub>Ni,<sup>2</sup> and (bipy)Ni(OPiv)<sub>2</sub><sup>3</sup> were synthesized according to literature procedures.

**Analytical methods.** Flash chromatography was performed with Sigma Aldrich technical grade silica gel 60 (230-400 mesh). Thin layer chromatography was carried out using Merck TLC Silica gel 60 F254. NMR spectra were recorded on Bruker Avance Ultrashield 300, 400, or 500 MHz spectrometers, with chemical shifts reported in parts per million (ppm) and coupling constants, *J*, reported in hertz. Quantitative NMR experiments were performed with d1 set to 10s (<sup>1</sup>H). Gas chromatographic analyses were performed on an Agilent 6890N gas chromatograph with an FID detector. Continuous wave (CW) X-band EPR spectra were obtained using a Bruker EMX Micro X-band spectrometer using a Bruker ER 1164 HS resonator. Spectra were simulated using SpinFit within Xenon. The samples were cooled to 77 K in a Suprasil finger dewar (Wilmad-LabGlass) filled with liquid nitrogen. The spectral data were collected with the following spectrometer settings: microwave power = 0.56mW; centre field = 3250 G, sweep width = 2500 G, sweep time = 35.07 s, modulation frequency = 100 KHz, modulation amplitude = 10 G, power attenuation = 25 dB, time constant = 20.48 ms. Simulations, *g* values, and frequencies are provided alongside the characterization data of the complexes. IR spectra were obtained with a Bruker FT-IR Alpha spectrometer. MALDI-TOF mass spectra were collected on a Bruker Autoflex MALDI-TOF mass spectrometer. Samples were prepared by the dried-droplet protocol, from solutions containing the charge-transfer matrix pyrene or DCTB in THF.

## Synthesis and Characterization of Complexes

### Synthesis of (L4)Ni(OPiv)<sub>2</sub>

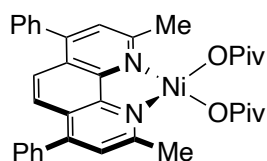

In the glovebox, (L4)NiCl<sub>2</sub> (224 mg, 0.46 mmol) was added to a 12 mL vial with potassium pivalate (206 mg, 1.66 mmol). A stir bar was added, and the vial was charged with 6 mL of toluene turning the pink powder to a pink suspension and let stir overnight. After 16 hours the green solution was filtered through a celite plug with salt being filtered off and a green solution collected. The solvent was then removed to afford a green solid and washed with pentane (1 mL x 3) to give (L4)Ni(OPiv)<sub>2</sub> (199 mg, 70 % yield) as a green powder.

**Stability:** Stable in air

<sup>1</sup>H NMR (<sup>1</sup>H NMR (400 MHz, C<sub>6</sub>D<sub>6</sub>) δ 49.57, 20.78, -9.05. <sup>13</sup>C NMR, no signals are observed due to paramagnetism of (L4)Ni(OPiv)<sub>2</sub>. [\[spectrum\]](#)

**X-Band EPR** = EPR Silent

**UV-VIS** (nm) = 685 nm [\[spectrum\]](#)

**Key IR Stretches** = 1619 cm<sup>-1</sup> (weak), 1527 cm<sup>-1</sup> (strong) [\[spectrum\]](#)

**EA** Calcd. C, 69.58; H, 6.16; N, 4.51; Found: C, 69.34; H, 6.14; N, 4.38

**Cyclic Voltammetry** = E<sub>p/2</sub> values for (L4)Ni(OPiv)<sub>2</sub> are Ni(II)/Ni(0) = -1.43 V. The reduction appears chemically reversible (E<sub>p</sub> oxidation = -1.27 V vs SCE) and electrochemically irreversible. [\[spectrum\]](#)

**Single Crystal XRD** [\[structure\]](#)

### Synthesis of (L4)Ni(OCOPh)<sub>2</sub>

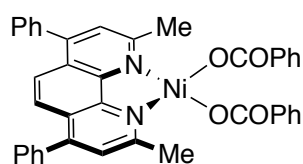

In the glovebox, (L4)NiCl<sub>2</sub> (122 mg, 0.25 mmol) and potassium benzoate (83 mg, 0.52 mmol, 2.08 equiv.) were added to a 10 mL vial. A stirbar was added and charged with 3 mL of THF and left to stir overnight in which a colour change from pink to orange to green is observed. The solvent was then removed and the solid was dissolved in DCM and filtered through a celite plug where a white solid was filtered off. The green filtrate was concentrated to dryness and filtered. The solid was washed with pentane (3 mL x 3) to afford (L4)Ni(OCOPh)<sub>2</sub> as a green powder (128 mg, 78 % yield).

**Stability:** Stable in air

<sup>1</sup>H NMR (500 MHz, THF-*d*<sub>3</sub>) δ 52.21, 21.77, -9.11. <sup>13</sup>C NMR, no signals are observed due to paramagnetism of (L4)Ni(OCOPh)<sub>2</sub>. [\[spectrum\]](#)

**X-Band EPR** = EPR Silent

**UV-VIS** (nm) = 700 nm [\[spectrum\]](#)

Go to: [\[table of contents\]](#) [\[references\]](#)

**Key IR Stretches** = 1593  $\text{cm}^{-1}$  (weak), 1528  $\text{cm}^{-1}$  (strong) [\[spectrum\]](#)

**Single crystal XRD** [\[structure\]](#)

### Synthesis of $[(\mathbf{L4})\text{Ni}(\text{OPh})_2]_2$

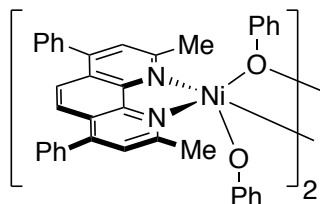

In the glovebox,  $(\mathbf{L4})\text{NiCl}_2$  (158 mg, 0.32 mmol) and sodium phenoxide (116 mg, 1.00 mmol, 3.1 equiv.) were added to a 10 mL vial. A stirbar was added and charged with 5 mL of toluene and left to stir overnight. The solvent was then removed and redissolved in DCM (sparingly soluble) and filtered through a celite plug. The solvent was removed, filtered and washed with pentane (3 mL x 3) to afford  $(\mathbf{L4})\text{Ni}(\text{OPh})_2$  as a brown powder (88 mg, 45 % yield).

$^1\text{H}$  NMR (400 MHz,  $\text{CD}_2\text{Cl}_2$ )  $\delta$  54.35, 49.37, 19.92, 18.28, 0.30, 0.09.  $^{13}\text{C}$  NMR, no signals are observed due to paramagnetism of  $[(\mathbf{L4})\text{Ni}(\text{OPh})_2]_2$ . [\[spectrum\]](#)

**X-Band EPR** = EPR Silent

**Key IR Stretches** = 1256  $\text{cm}^{-1}$  (strong) [\[spectrum\]](#)

**Single crystal XRD** [\[structure\]](#)

### Synthesis of $\text{NiLi}_3\text{Cl}_2(\text{O}^t\text{Bu})_3 \cdot 2\text{THF}$

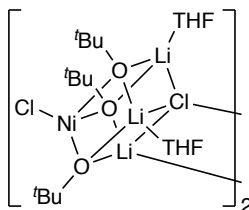

In the glovebox,  $(\mathbf{L4})\text{NiCl}_2$  (113 mg, 0.23 mmol) and lithium tert-butoxide (41 mg, 0.51 mmol) were added to a 10 mL vial. A stirbar was added and charged with 3 mL of THF and left to stir overnight. The solvent was then removed and dissolved in minimal THF, and then filtered through a celite plug. The solvent was removed, filtered and washed with pentane (3 mL x 3) to afford  $\text{NiLi}_3\text{Cl}_2(\text{O}^t\text{Bu})_3 \cdot 2\text{THF}$  as a blue powder (88 mg, quantitative).

**Stability:** Unstable in air

$^1\text{H}$  NMR (400 MHz,  $\text{THF}-d_8$ )  $\delta$  33.31, 32.48, 13.01.  $^{13}\text{C}$  NMR, no signals are observed due to paramagnetism of  $\text{NiLi}_3\text{Cl}_2(\text{O}^t\text{Bu})_3 \cdot 2\text{THF}$ . [\[spectrum\]](#)

**X-Band EPR** = EPR Silent

**Single crystal XRD** [\[structure\]](#)

### Synthesis of $[(\mathbf{L4})_2\text{Ni}]\text{Cl}$

Go to: [\[table of contents\]](#) [\[references\]](#)

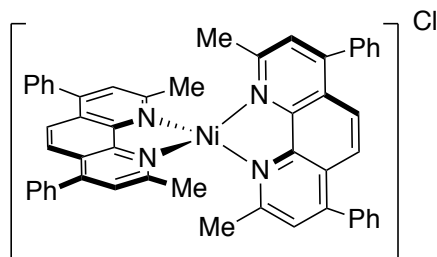

Following a modification of literature procedures,<sup>4</sup> in the glovebox, (L4)NiCl<sub>2</sub> (44 mg, 0.09 mmol), Ni(COD)<sub>2</sub> (25 mg, 0.09 mmol, 1 equiv) and L4 (96 mg, 0.27 mmol, 3 equiv) were added to a 10 mL vial. A stirbar was added and charged with 5 mL of THF and left to stir overnight. The solvent was removed, filtered and washed with pentane (1 mL x 3, cold -36 °C) to afford [(L4)<sub>2</sub>Ni]Cl as a purple powder (132 mg, 91 % yield).

**Stability:** Unstable in air

<sup>1</sup>H NMR (400 MHz, THF-*d*<sub>8</sub>) δ 75.78, 53.72, 25.67, 18.75, 14.13. <sup>13</sup>C NMR, no signals are observed due to paramagnetism of [(L4)<sub>2</sub>Ni]Cl. [\[spectrum\]](#)

**X-Band EPR** = g(x) = 2.109, g(y) = 2.106, g(z) = 2.445 [\[spectrum\]](#)

**UV-VIS** (nm) = 560 nm, 735 nm [\[spectrum\]](#)

### Synthesis of [(L4)<sub>2</sub>Ni]Br

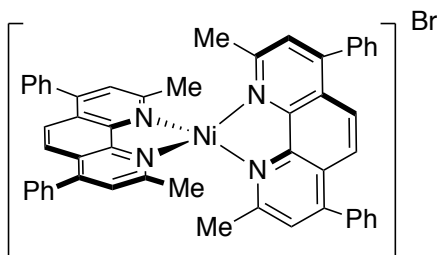

Following a modification of literature procedures,<sup>4</sup> in the glovebox, (L4)NiBr<sub>2</sub> (60 mg, 0.10 mmol), Ni(COD)<sub>2</sub> (29 mg, 0.10 mmol, 1 equiv) and L4 (112 mg, 0.31 mmol, 3 equiv) were added to a 10 mL vial. A stirbar was added and charged with 5 mL of THF and left to stir overnight. The solvent was removed, filtered and washed with pentane (1 mL x 3, cold -36 °C) to afford [(L4)<sub>2</sub>Ni]Br as a blue powder (167 mg, 94 % yield).

**Stability:** Unstable in air

<sup>1</sup>H NMR (400 MHz, THF-*d*<sub>8</sub>) δ 24.45, 12.22. <sup>13</sup>C NMR, no signals are observed due to paramagnetism of [(L4)<sub>2</sub>Ni]Br. [\[spectrum\]](#)

**X-Band EPR** = g(x) = 2.115, g(y) = 2.114, g(z) = 2.456 [\[spectrum\]](#)

**UV-VIS** (nm) = 560 nm, 690 nm [\[spectrum\]](#)

**Single crystal XRD** [\[structure\]](#)

Go to: [\[table of contents\]](#) [\[references\]](#)

### Synthesis of (L3)Ni(OPiv)<sub>2</sub>

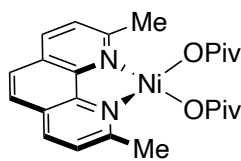

In the glovebox, (L3)NiCl<sub>2</sub> (97 mg, 0.29 mmol) was added to a 12 mL vial with potassium pivalate (143 mg, 1.15 mmol, 4 equiv). A stir bar was added, and the vial was charged with 7 mL of toluene turning the pink powder to a pink suspension and let stir overnight. After 16 hours the green suspension was filtered through a celite plug and washed with DCM (8 mL) with the salt being filtered off and a green solution collected. The solvent was then removed to afford a green solid and washed with pentane (1 mL x 3) to give (L3)Ni(OPiv)<sub>2</sub> (123 mg, 90 % yield) as a green powder.

<sup>1</sup>H NMR (<sup>1</sup>H NMR (400 MHz, C<sub>6</sub>D<sub>6</sub>) δ 48.92, 18.43, 15.50, -9.49. <sup>13</sup>C NMR, no signals are observed due to paramagnetism of (L3)Ni(OPiv)<sub>2</sub>. [\[spectrum\]](#)

X-Band EPR = EPR Silent

Single Crystal XRD [\[structure\]](#)

## Stoichiometric Reactions.

### No reaction between (L4)Ni(OPiv)<sub>2</sub> and (L4)<sub>2</sub>Ni

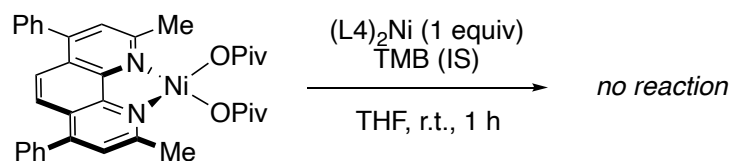

**Monitored by quantitative <sup>1</sup>H NMR and paramagnetic <sup>1</sup>H NMR.** In the glovebox, (L4)<sub>2</sub>Ni (12 mg, 0.02 mmol) and TMB (1 mg, internal standard) were added to a 4 mL vial with 1 mL of THF-*d*<sub>8</sub>. The solution was transferred to a J-Young NMR tube and the initial integration of (L4)<sub>2</sub>Ni and TMB was recorded. The J-Young NMR tube was brought back into the glovebox and added to a vial containing (L4)Ni(OPiv)<sub>2</sub> (10 mg, 0.02 mmol) and stirred for 1 h before transferring back into the J-Young NMR tube and analyzed by <sup>1</sup>H NMR. No conversion of (L4)<sub>2</sub>Ni was observed and paramagnetic signals of (L4)Ni(OPiv)<sub>2</sub> remained with no additional signals of paramagnetic species observed. Conclusion: This is consistent with no reaction between (L4)<sub>2</sub>Ni and (L4)Ni(OPiv)<sub>2</sub>.

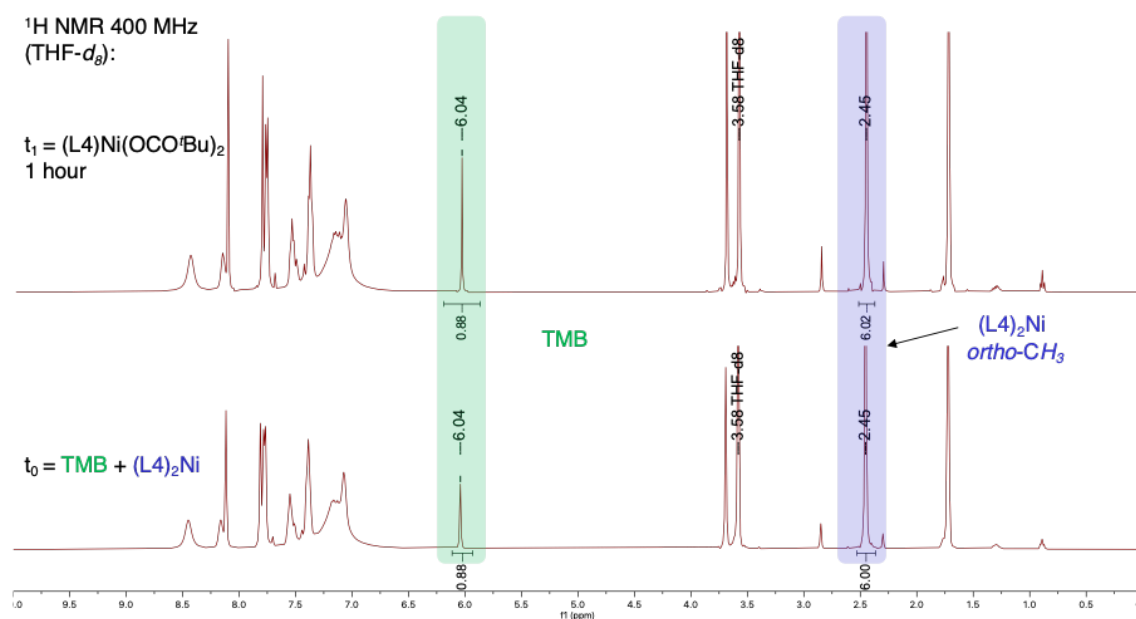

**Supplementary Figure 1.** Quantitative <sup>1</sup>H NMR spectra of TMB and (L4)<sub>2</sub>Ni indicating no conversion of (L4)<sub>2</sub>Ni upon adding (L4)Ni(OPiv)<sub>2</sub>. Internal standard trimethoxybenzene, TMB (green) and (L4)<sub>2</sub>Ni (blue).



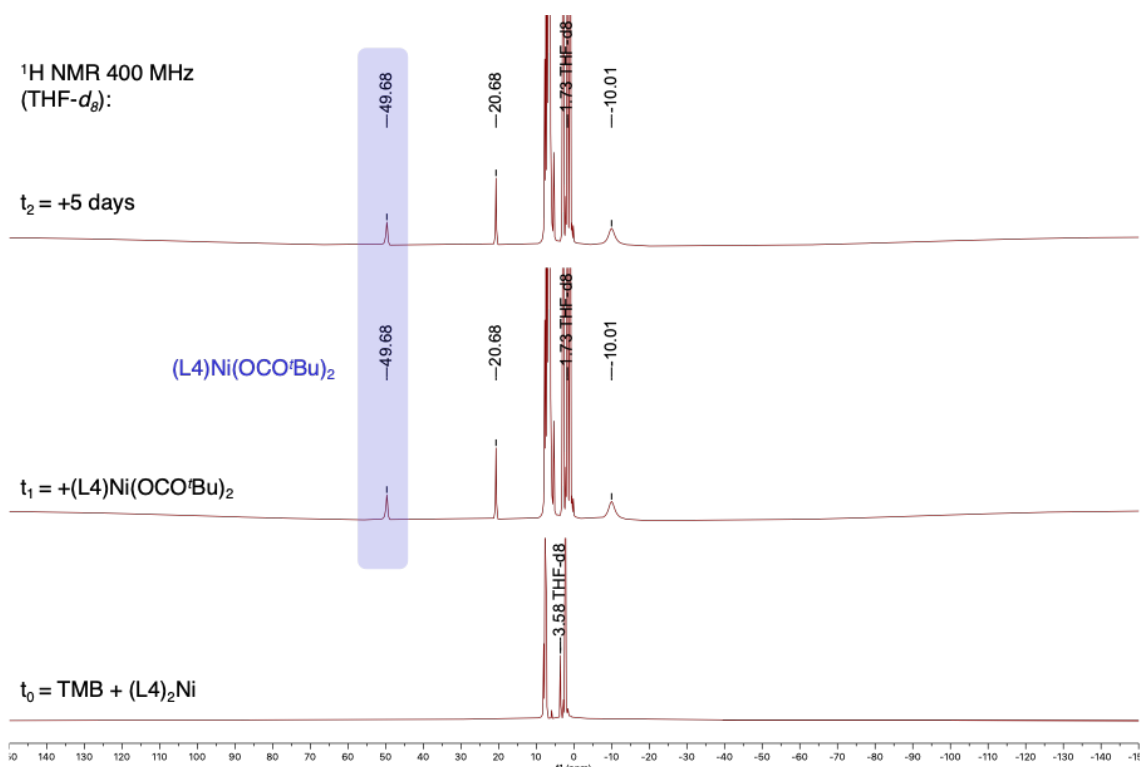

**Supplementary Figure 2.** Paramagnetic  $^1\text{H}$  NMR spectra upon mixing  $(\text{L4})\text{Ni}(\text{OPiv})_2$  and  $(\text{L4})_2\text{Ni}$  indicating no conversion of  $(\text{L4})\text{Ni}(\text{OPiv})_2$ .  $(\text{L4})\text{Ni}(\text{OPiv})_2$  (blue).

**Monitored by EPR.** In the glovebox, a solution of  $(\text{L4})_2\text{Ni}$  was prepared and the EPR spectrum of  $(\text{L4})_2\text{Ni}$  was recorded which was EPR silent. Separately,  $(\text{L4})\text{Ni}(\text{OPiv})_2$  (10 mg, 0.02 mmol) and  $(\text{L4})_2\text{Ni}$  (12 mg, 0.02 mmol) were added to a 4 mL vial. A stir bar was added, and the vial was charged with 1 mL of THF. After 1 hour, a 100  $\mu\text{L}$  aliquot was removed and diluted to 800  $\mu\text{L}$  in THF and then analyzed by EPR, in which no EPR signals corresponding to Ni(I) species were observed. As described in the synthesis of  $(\text{L4})\text{Ni}(\text{OPiv})_2$ , this Ni(II) complex is X-band EPR silent.

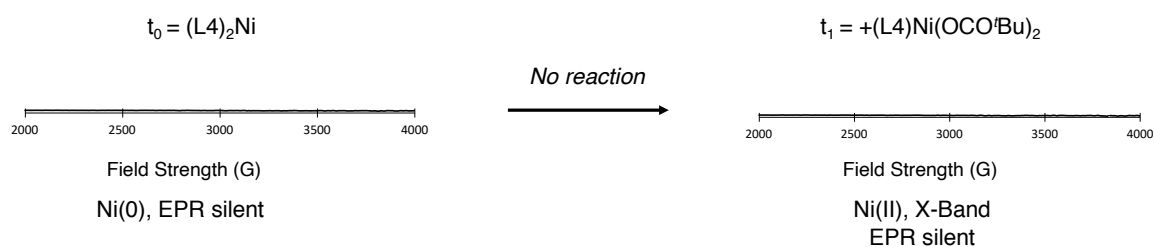

**Supplementary Figure 3.** Continuous wave (CW) X-Band EPR spectra of  $(\text{L4})_2\text{Ni}$  and upon mixing  $(\text{L4})\text{Ni}(\text{OPiv})_2$  and  $(\text{L4})_2\text{Ni}$  indicating no formation of Ni(I) species.  $(\text{L4})_2\text{Ni}$  and  $(\text{L4})\text{Ni}(\text{OPiv})_2$  are both X-Band EPR silent, while Ni(I) species would be EPR active.

### No reaction between (L4)Ni(OCOPh)<sub>2</sub> and (L4)<sub>2</sub>Ni

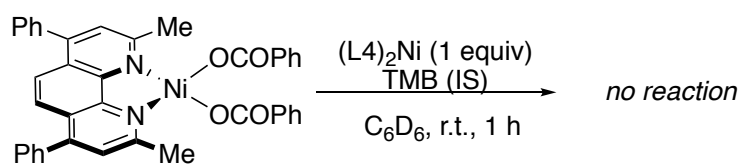

**Monitored by quantitative <sup>1</sup>H NMR and paramagnetic <sup>1</sup>H NMR.** In the glovebox, (L4)<sub>2</sub>Ni (10 mg, 0.01 mmol) and TMB (1 mg, internal standard) were added to a 4 mL vial with 1 mL of C<sub>6</sub>D<sub>6</sub>. The solution was transferred to a J-Young NMR tube and the initial integration of (L4)<sub>2</sub>Ni and TMB was recorded. The J-Young NMR tube was brought back into the glovebox and added to a vial containing (L4)Ni(OCOPh)<sub>2</sub> (9 mg, 0.01 mmol) and stirred for 1 h before transferring back into the J-Young NMR tube and analyzed by <sup>1</sup>H NMR. No conversion of (L4)<sub>2</sub>Ni was observed and paramagnetic signals of (L4)Ni(OCOPh)<sub>2</sub> remained with no additional signals of paramagnetic species observed. Conclusion: This is consistent with no reaction between (L4)<sub>2</sub>Ni and (L4)Ni(OCOPh)<sub>2</sub>.

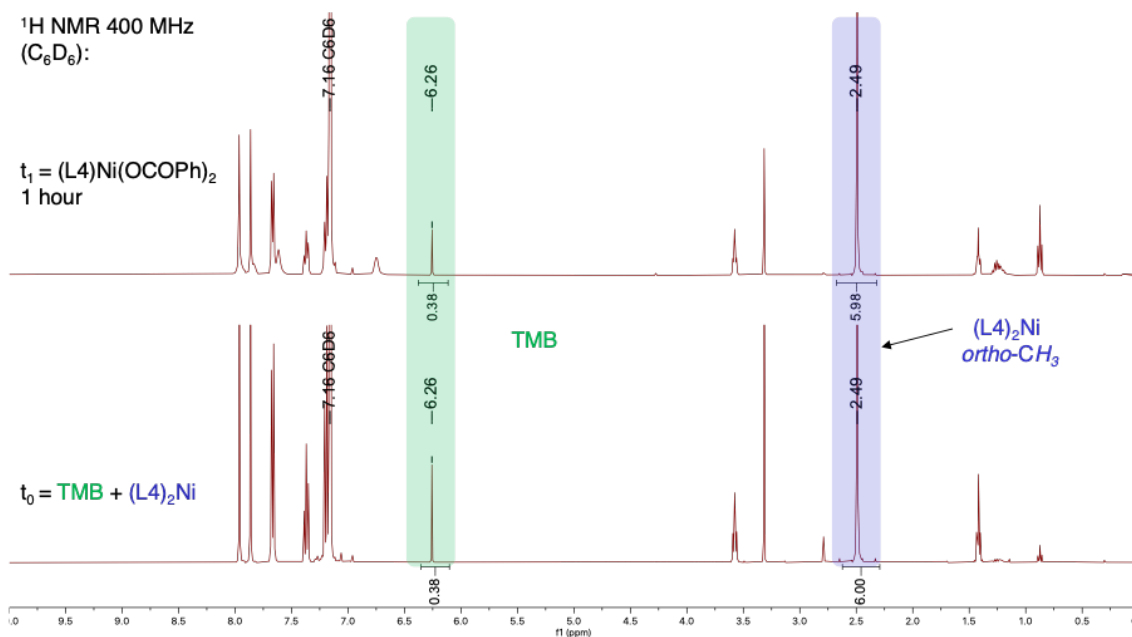

**Supplementary Figure 4.** Quantitative <sup>1</sup>H NMR spectra of TMB and (L4)<sub>2</sub>Ni indicating no conversion of (L4)<sub>2</sub>Ni upon adding (L4)Ni(OCOPh)<sub>2</sub>. Internal standard trimethoxybenzene, TMB (green) and (L4)<sub>2</sub>Ni (blue).

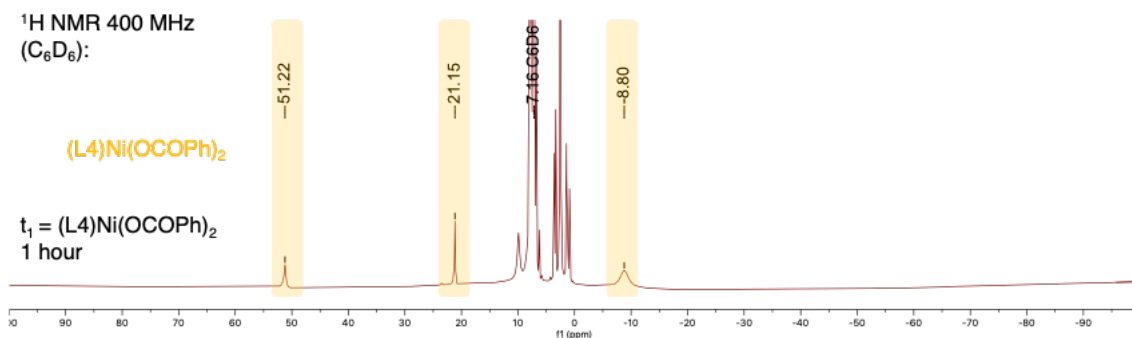

**Supplementary Figure 5.** Paramagnetic  $^1\text{H}$  NMR spectra upon mixing  $(\text{L4})\text{Ni}(\text{OCOPh})_2$  and  $(\text{L4})_2\text{Ni}$  indicating no conversion of  $(\text{L4})\text{Ni}(\text{OCOPh})_2$ .  $(\text{L4})\text{Ni}(\text{OCOPh})_2$  (orange).

**Monitored by EPR.** In the glovebox,  $(\text{L4})\text{Ni}(\text{OCOPh})_2$  (8 mg, 0.02 mmol) and  $(\text{L4})_2\text{Ni}$  (9 mg, 0.01 mmol) were added to a 4 mL vial. A stir bar was added, and the vial was charged with 1 mL of THF. After 1 hour, a 100  $\mu\text{L}$  aliquot was removed and diluted to 800  $\mu\text{L}$  in THF and then analyzed by EPR.

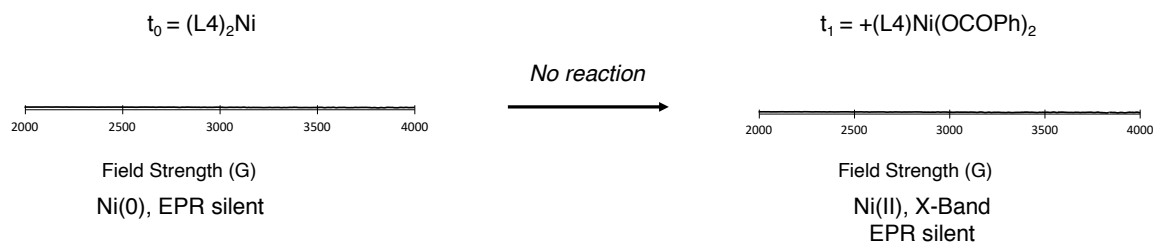

**Supplementary Figure 6.** Continuous wave (CW) X-Band EPR spectra of  $(\text{L4})_2\text{Ni}$  and upon mixing  $(\text{L4})\text{Ni}(\text{OCOPh})_2$  and  $(\text{L4})_2\text{Ni}$  indicating no formation of Ni(I) species.  $(\text{L4})_2\text{Ni}$  and  $(\text{L4})\text{Ni}(\text{OCOPh})_2$  are both X-Band EPR silent, while Ni(I) species would be EPR active.

### No reaction between $[(\text{L4})\text{Ni}(\text{OPh})_2]_2$ and $(\text{L4})_2\text{Ni}$

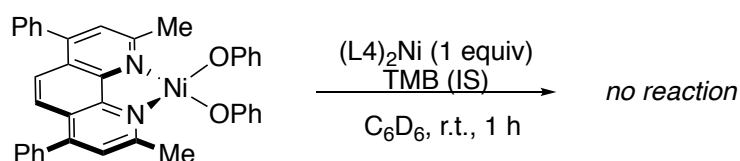

**Monitored by quantitative  $^1\text{H}$  NMR and paramagnetic  $^1\text{H}$  NMR.** In the glovebox,  $(\text{L4})_2\text{Ni}$  (10 mg, 0.01 mmol) and TMB (1 mg, internal standard) were added to a 4 mL vial with 1 mL of  $\text{C}_6\text{D}_6$ . The solution was transferred to a J-Young NMR tube and the initial integration of  $(\text{L4})_2\text{Ni}$  and TMB was recorded. The J-Young NMR tube was brought back into the glovebox and added to a vial containing  $[(\text{L4})\text{Ni}(\text{OPh})_2]_2$  (8 mg, 0.01 mmol) and stirred for 1 h before transferring back into the J-Young NMR tube and analyzed by  $^1\text{H}$  NMR. No conversion of  $(\text{L4})_2\text{Ni}$  was observed with no additional signals of paramagnetic species observed, signals for  $[(\text{L4})\text{Ni}(\text{OPh})_2]_2$  were observed in low intensity due to the poor solubility in  $\text{C}_6\text{D}_6$ . Conclusion: This is consistent with no reaction between  $(\text{L4})_2\text{Ni}$  and  $[(\text{L4})\text{Ni}(\text{OPh})_2]_2$ .

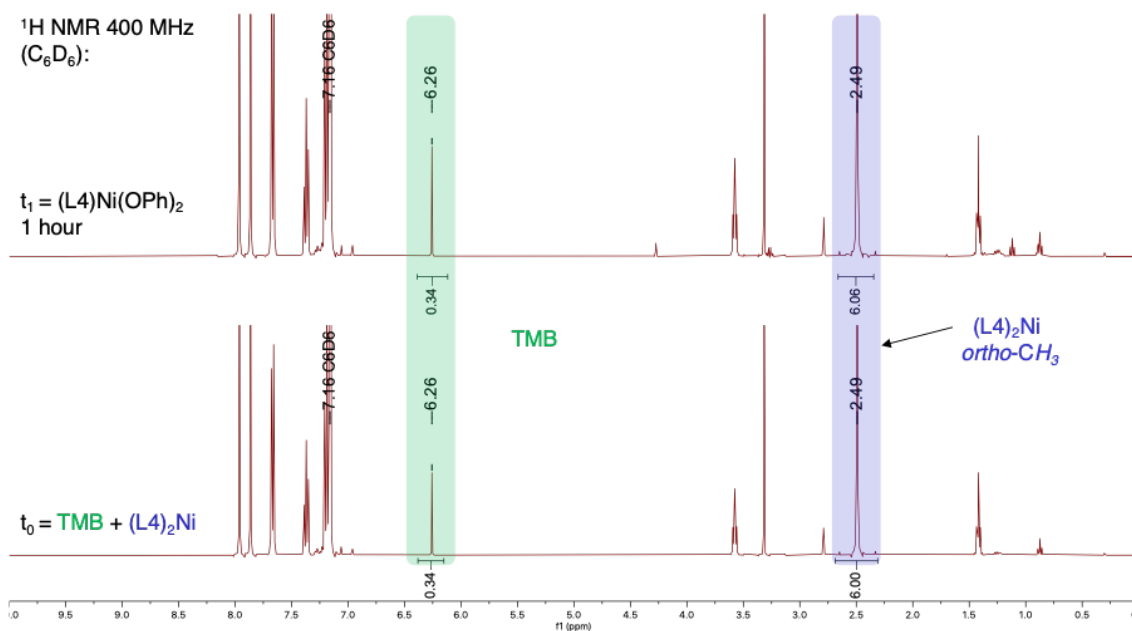

**Supplementary Figure 7.** Quantitative <sup>1</sup>H NMR spectra of TMB and (L<sub>4</sub>)<sub>2</sub>Ni indicating no conversion of (L<sub>4</sub>)<sub>2</sub>Ni upon adding [(L<sub>4</sub>)Ni(OPh)<sub>2</sub>]<sub>2</sub>. Internal standard trimethoxybenzene, TMB (green) and (L<sub>4</sub>)<sub>2</sub>Ni (blue).

**Monitored by EPR.** In the glovebox, [(L<sub>4</sub>)Ni(OPh)<sub>2</sub>]<sub>2</sub> (10 mg, 0.02 mmol) and (L<sub>4</sub>)<sub>2</sub>Ni (12 mg, 0.02 mmol) were added to a 4 mL vial. A stir bar was added, and the vial was charged with 1 mL of THF. After 1 hour, a 100 uL aliquot was removed and diluted to 800 uL in THF and then analyzed by EPR.

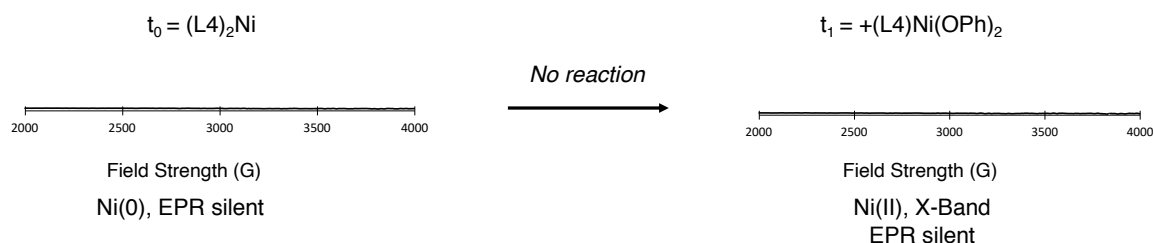

**Supplementary Figure 8.** Continuous wave (CW) X-Band EPR spectra of (L<sub>4</sub>)<sub>2</sub>Ni and upon mixing [(L<sub>4</sub>)Ni(OPh)<sub>2</sub>]<sub>2</sub> and (L<sub>4</sub>)<sub>2</sub>Ni indicating no formation of Ni(I) species. (L<sub>4</sub>)<sub>2</sub>Ni and [(L<sub>4</sub>)Ni(OPh)<sub>2</sub>]<sub>2</sub> are both X-Band EPR silent, while Ni(I) species would be EPR active.

### No reaction between (L<sub>3</sub>)Ni(OPiv)<sub>2</sub> and (L<sub>3</sub>)<sub>2</sub>Ni

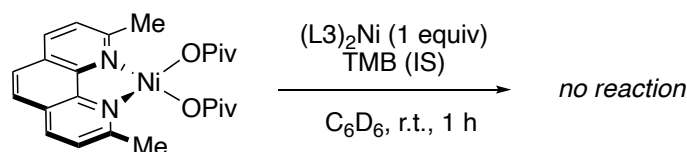

**Monitored by quantitative <sup>1</sup>H NMR and paramagnetic <sup>1</sup>H NMR.** In the glovebox, (L<sub>3</sub>)<sub>2</sub>Ni (4.4 mg, 0.01 mmol) and TMB (1 mg, internal standard) were added to a 4 mL vial with 0.7 mL of C<sub>6</sub>D<sub>6</sub> and filtered through a celite plug to remove traces of undissolved material and the filtrate

was diluted further with 0.4 mL of  $C_6D_6$  to prevent  $(L3)_2Ni$  from precipitating out of solution. The solution was transferred to a J-Young NMR tube and the initial integration of  $(L3)_2Ni$  and TMB was recorded. The J-Young NMR tube was brought back into the glovebox and added to a vial containing  $(L3)Ni(OPiv)_2$  (4.3 mg, 0.01 mmol) and stirred for 1 h before transferring back into the J-Young NMR tube and analyzed by  $^1H$  NMR. No conversion of  $(L3)_2Ni$  was observed and paramagnetic signals of  $(L3)Ni(OPiv)_2$  remained with no additional signals of paramagnetic species observed. Conclusion: This is consistent with no reaction between  $(L3)_2Ni$  and  $(L3)Ni(OPiv)_2$ .

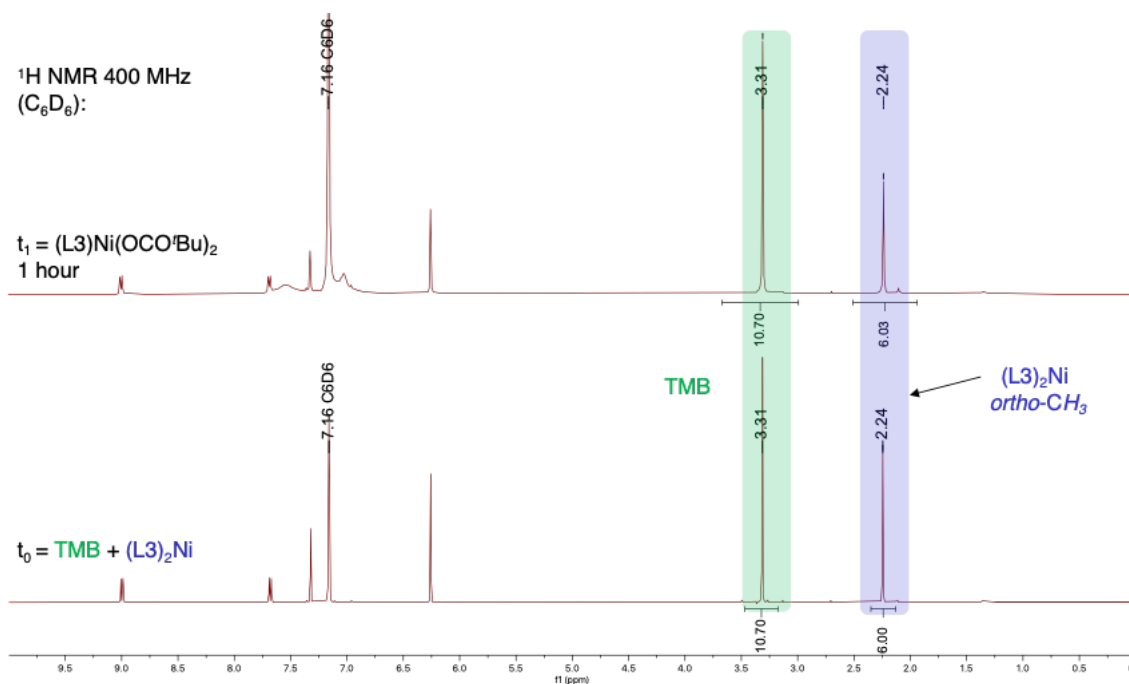

**Supplementary Figure 9.** Quantitative  $^1H$  NMR spectra of TMB and  $(L3)_2Ni$  indicating no conversion of  $(L3)_2Ni$  upon adding  $(L3)Ni(OPiv)_2$ . Internal standard trimethoxybenzene, TMB (green) and  $(L3)_2Ni$  (blue).

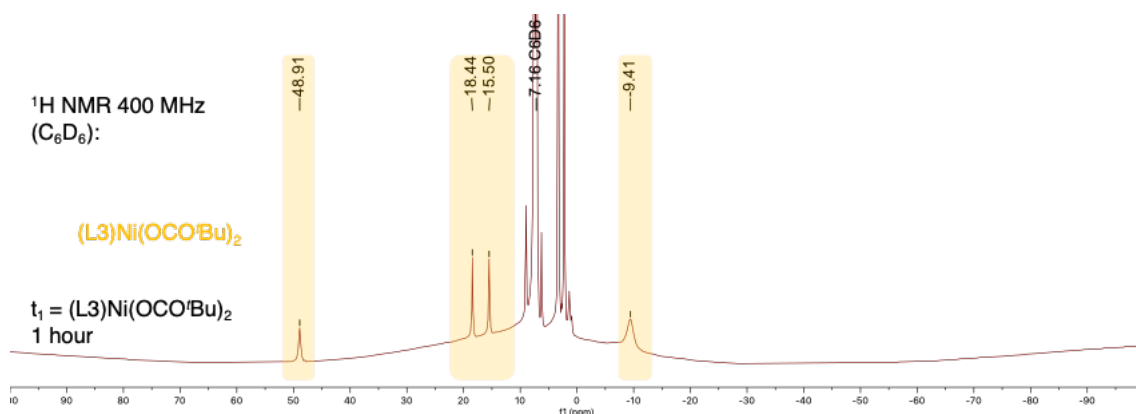

**Supplementary Figure 10.** Paramagnetic  $^1H$  NMR spectra upon mixing  $(L3)Ni(OPiv)_2$  and  $(L3)_2Ni$  indicating no conversion of  $(L3)Ni(OPiv)_2$ .  $(L3)Ni(OPiv)_2$  (orange).

## Reaction between (L4)NiBr<sub>2</sub> and (L4)<sub>2</sub>Ni

**Monitored by quantitative <sup>1</sup>H NMR and paramagnetic <sup>1</sup>H NMR.** In the glovebox, (L4)<sub>2</sub>Ni (10 mg, 0.01 mmol) and TMB (1 mg, internal standard) were added to a 4 mL vial with 1 mL of THF-*d*<sub>8</sub>. The solution was transferred to a J-Young NMR tube and the initial integration of (L4)<sub>2</sub>Ni and TMB was recorded. The J-Young NMR tube was brought back into the glovebox and added to a vial containing (L4)NiBr<sub>2</sub> (7 mg, 0.01 mmol) and stirred for 1 h before transferring back into the J-Young NMR tube and analyzed by <sup>1</sup>H NMR. Full conversion of (L4)<sub>2</sub>Ni was observed with additional signals of paramagnetic species observed. Conclusion: This is consistent with reaction between (L4)<sub>2</sub>Ni and (L4)NiBr<sub>2</sub> to form Ni(I) complex [(L4)<sub>2</sub>Ni]Br.

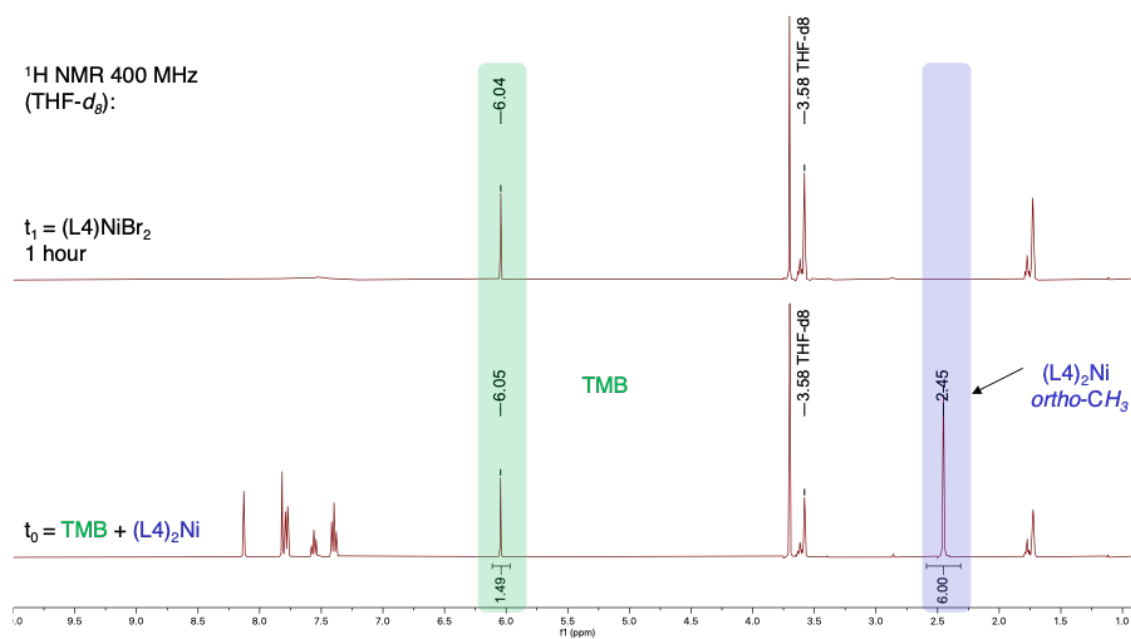

**Supplementary Figure 11.** Quantitative <sup>1</sup>H NMR spectra of TMB and (L4)<sub>2</sub>Ni indicating full conversion of (L4)<sub>2</sub>Ni upon adding (L4)NiBr<sub>2</sub>. Internal standard trimethoxybenzene, TMB (green) and (L4)<sub>2</sub>Ni (blue).

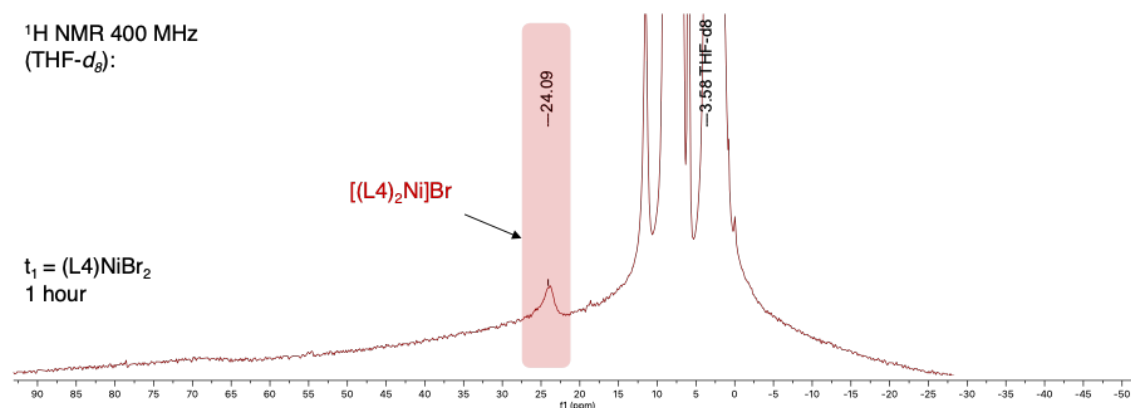

**Supplementary Figure 12.** Paramagnetic <sup>1</sup>H NMR spectra upon mixing (L4)NiBr<sub>2</sub> and (L4)<sub>2</sub>Ni indicating full conversion of (L4)<sub>2</sub>Ni and formation of [(L4)<sub>2</sub>Ni]Br. [(L4)<sub>2</sub>Ni]Br (red).

**Monitored by EPR.** In the glovebox, (L4)NiBr<sub>2</sub> (8 mg, 0.01 mmol) and (L4)<sub>2</sub>Ni (11 mg, 0.01 mmol) were added to a 4 mL vial. A stir bar was added, and the vial was charged with 1 mL of THF. After 1 hour, a 100 uL aliquot was removed and diluted to 800 uL in THF and then analyzed by EPR.

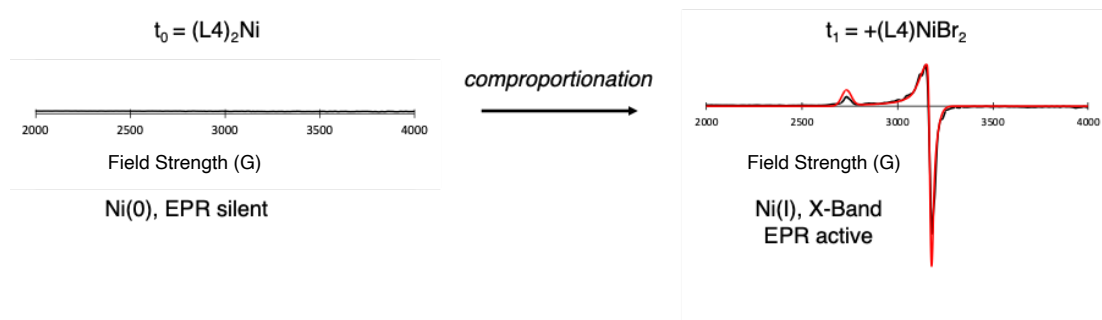

**Supplementary Figure 13.** Continuous wave (CW) X-Band EPR spectra of (L4)<sub>2</sub>Ni and upon mixing (L4)NiBr<sub>2</sub> and (L4)<sub>2</sub>Ni indicating formation of Ni(I) species. (L4)<sub>2</sub>Ni and (L4)NiBr<sub>2</sub> are both X-Band EPR silent, while Ni(I) species [(L4)<sub>2</sub>Ni]Br would be EPR active.

**Monitored rate of reaction by UV-VIS.** In the glovebox, a solution of (L4)<sub>2</sub>Ni (0.04 mM, 2.5 mL) in THF was transferred to a sealed cuvette. The UV-VIS spectra was monitored at 550 nm an a solution of (L4)NiBr<sub>2</sub> (0.4 mM, 0.25 mL) was injected via microsyringe in which the reaction was complete within 4 seconds. Noise from injecting the solution of (L4)NiBr<sub>2</sub> precluded accurate rate measurements. Conclusion: This is consistent with reaction between (L4)<sub>2</sub>Ni and (L4)NiBr<sub>2</sub> to form Ni(I) complex [(L4)<sub>2</sub>Ni]Br occurs rapidly.

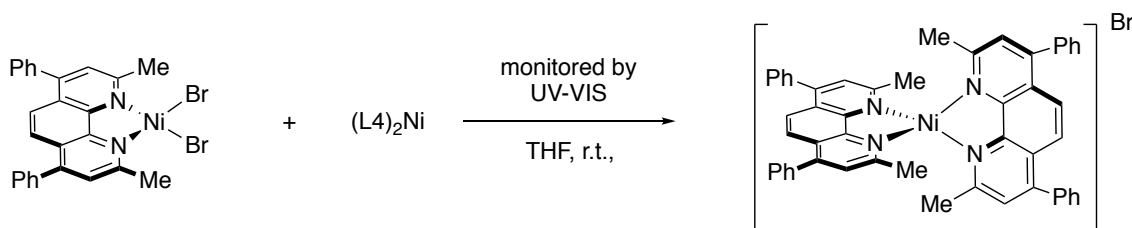

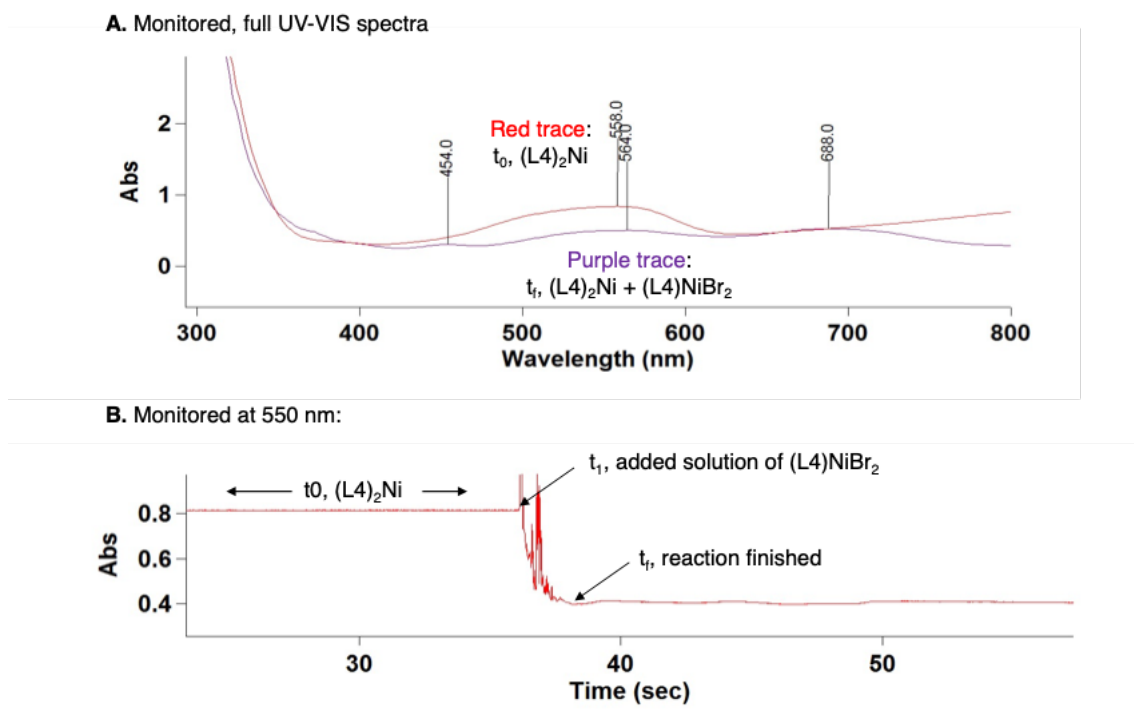

**Supplementary Figure 14.** Monitoring the reaction of  $(\mathbf{L4})_2\text{Ni}$  and  $(\mathbf{L4})\text{NiBr}_2$  by UV-VIS spectroscopy. **A.** Initial UV-VIS spectrum of  $(\mathbf{L4})_2\text{Ni}$  (red trace) and the resulting spectrum after addition of  $(\mathbf{L4})\text{NiBr}_2$ . **B.** Monitoring the reaction at 550 nm.

#### Reaction between $[(\mathbf{L4})_2\text{Ni}]\text{Cl}$ and potassium pivalate in THF

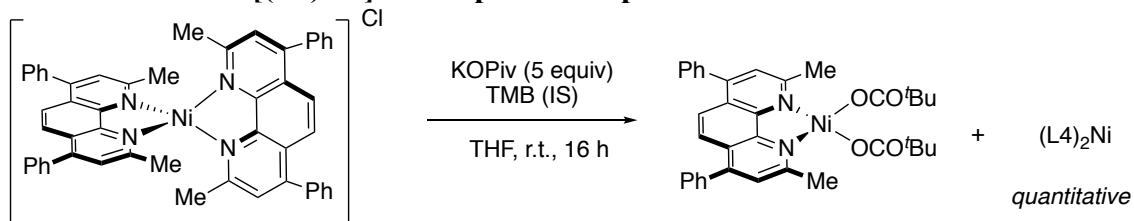

**Monitored by quantitative  $^1\text{H}$  NMR and paramagnetic  $^1\text{H}$  NMR.** In the glovebox,  $[(\mathbf{L4})_2\text{Ni}]\text{Cl}$  (22 mg, 0.03 mmol) and potassium pivalate (18 mg, 0.15 mmol, 5 equiv) were added to a 4 mL vial. A stir bar was added, and the vial was charged with 2 mL of THF. After 16 hour, the solvent was removed and redissolved in 3 mL of  $\text{C}_6\text{D}_6$ . To this solution, a stock solution of TMB in  $\text{C}_6\text{D}_6$  was added and the integral ratio of TMB to  $(\mathbf{L4})_2\text{Ni}$  was measured by  $^1\text{H}$  NMR to determine  $(\mathbf{L4})_2\text{Ni}$  had formed in quantitative yield and the only species observed in the paramagnetic NMR was  $(\mathbf{L4})\text{Ni}(\text{OPiv})_2$ . Attempts to follow these reactions by EPR and paramagnetic NMR were performed to identify the formation of transient  $(\mathbf{L4})\text{Ni}^{\text{I}}\text{-OPiv}$ , however we were unable to identify any new signals that would correspond to this species suggested it undergo rapid disproportionation once formed. Conclusion: This is consistent with reaction between Ni(I) complex  $[(\mathbf{L4})_2\text{Ni}]\text{Cl}$  and potassium pivalate to form  $(\mathbf{L4})_2\text{Ni}$  and  $(\mathbf{L4})\text{Ni}(\text{OPiv})_2$ .



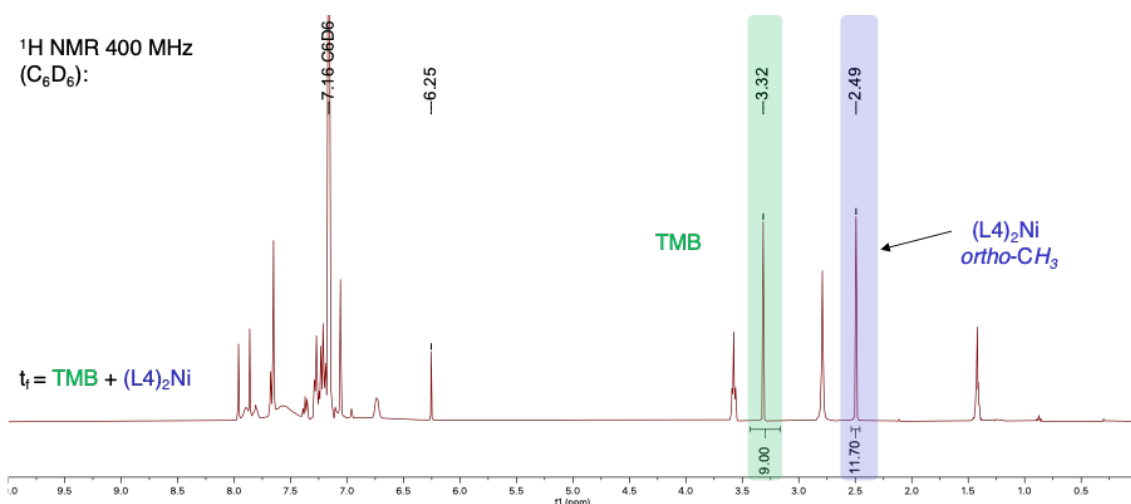

**Supplementary Figure 15.** Quantitative  $^1\text{H}$  NMR spectra of TMB and  $(\text{L4})_2\text{Ni}$  after reacting  $[(\text{L4})_2\text{Ni}]\text{Cl}$  with potassium pivalate. Internal standard trimethoxybenzene, TMB (green) and  $(\text{L4})_2\text{Ni}$  (blue).

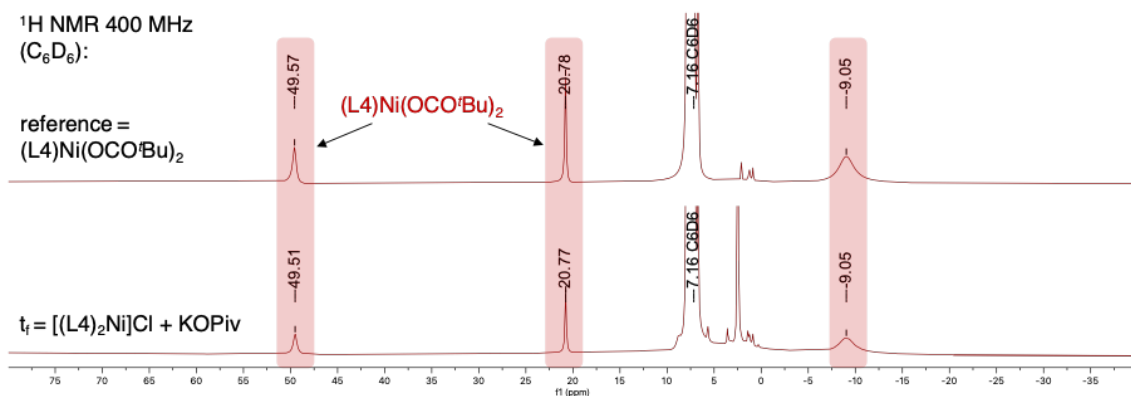

**Supplementary Figure 16.** Paramagnetic  $^1\text{H}$  NMR spectra upon mixing  $[(\text{L4})_2\text{Ni}]\text{Cl}$  with potassium pivalate formation of  $(\text{L4})\text{Ni}(\text{OPiv})_2$ .  $(\text{L4})\text{Ni}(\text{OPiv})_2$  (red).

**Monitored by EPR.** In the glovebox,  $[(\text{L4})_2\text{Ni}]\text{Cl}$  (10 mg, 0.01 mmol) and potassium pivalate (8 mg, 0.06 mmol, 6 equiv) were added to a 4 mL vial. A stir bar was added, and the vial was charged with 1 mL of THF. After 16 hour, a 100  $\mu\text{L}$  aliquot was removed and diluted to 800  $\mu\text{L}$  in THF and then analyzed by EPR.

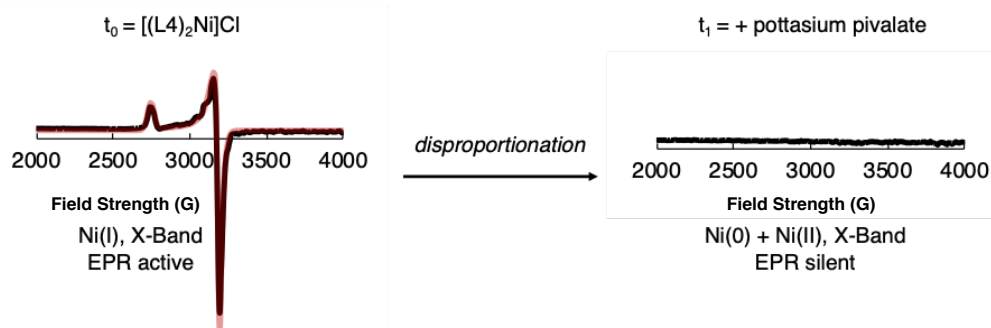

**Supplementary Figure 17.** Continuous wave (CW) X-Band EPR spectra of  $[(\text{L4})_2\text{Ni}]\text{Cl}$  and upon mixing  $[(\text{L4})_2\text{Ni}]\text{Cl}$  with potassium pivalate indicating loss of Ni(I) species  $[(\text{L4})_2\text{Ni}]\text{Cl}$ .  $(\text{L4})_2\text{Ni}$  and  $(\text{L4})\text{Ni}(\text{OPiv})_2$  are both X-Band EPR silent, while Ni(I) species  $[(\text{L4})_2\text{Ni}]\text{Cl}$  would be EPR active.

### Reaction between $[(L4)_2Ni]Cl$ and potassium pivalate in MeCN

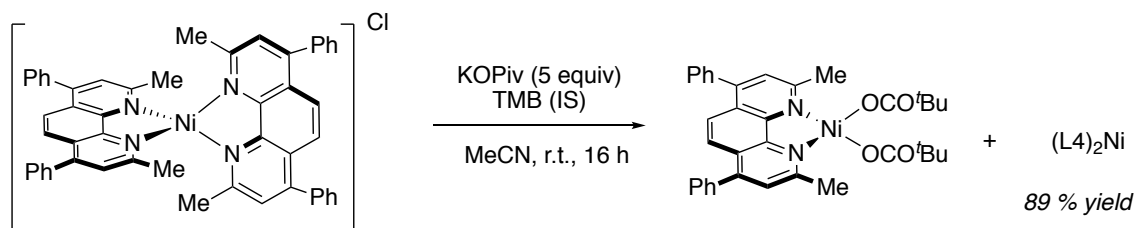

**Monitored by quantitative  $^1H$  NMR and paramagnetic  $^1H$  NMR.** In the glovebox,  $[(L4)_2Ni]Cl$  (18 mg, 0.02 mmol) and potassium pivalate (14 mg, 0.11 mmol, 5 equiv) were added to a 4 mL vial. A stir bar was added, and the vial was charged with 3 mL of MeCN. After 16 hour, the solvent was removed and redissolved in 3 mL of  $C_6D_6$ . To this solution, a stock solution of TMB in  $C_6D_6$  was added and the integral ratio of TMB to  $(L4)_2Ni$  was measured by  $^1H$  NMR to determine  $(L4)_2Ni$  had formed in 89 % yield and the only species observed in the paramagnetic NMR was  $(L4)Ni(OPiv)_2$ . Conclusion: This is consistent with reaction between Ni(I) complex  $[(L4)_2Ni]Cl$  and potassium pivalate to form  $(L4)_2Ni$  and  $(L4)Ni(OPiv)_2$ .

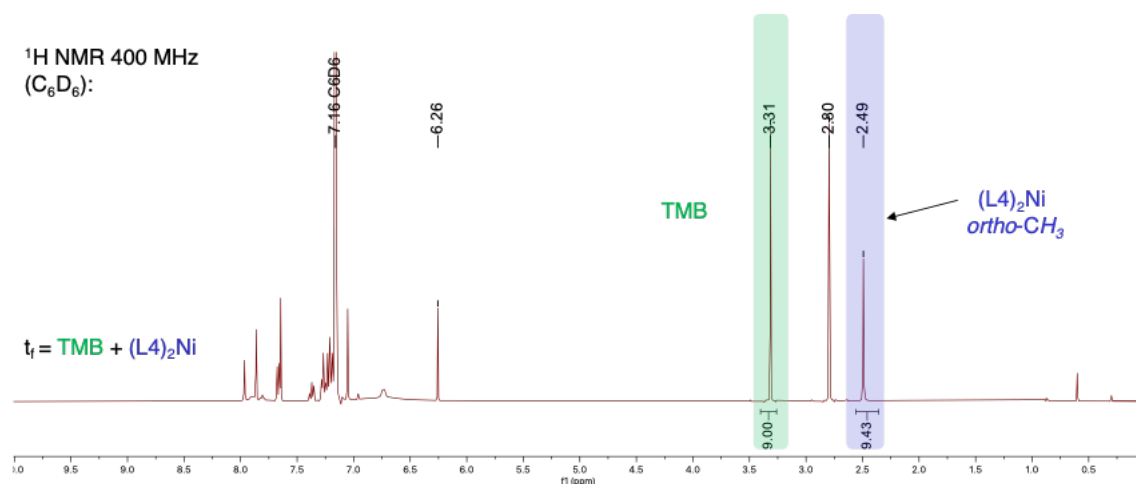

**Supplementary Figure 18.** Quantitative  $^1H$  NMR spectra of TMB and  $(L4)_2Ni$  after reacting  $[(L4)_2Ni]Cl$  with potassium pivalate. Internal standard trimethoxybenzene, TMB (green) and  $(L4)_2Ni$  (blue).

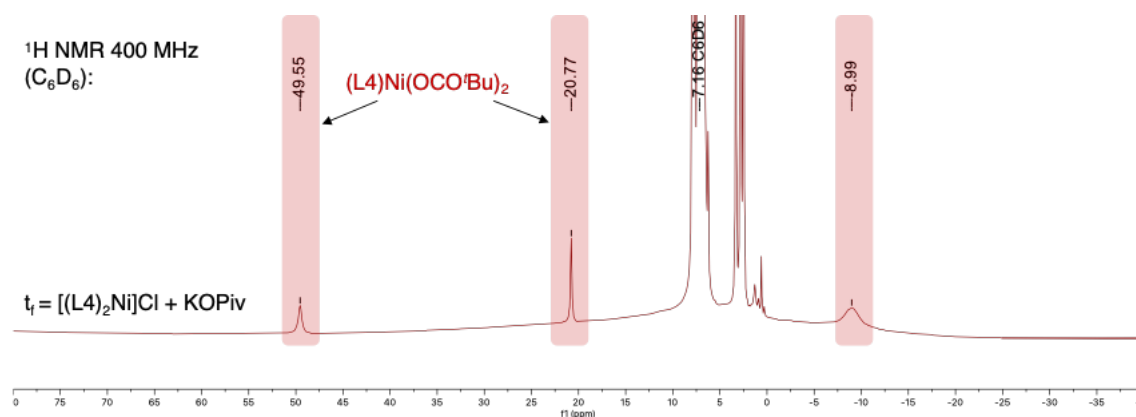

**Supplementary Figure 19.** Paramagnetic  $^1\text{H}$  NMR spectra upon mixing  $[(\text{L4})_2\text{Ni}]\text{Cl}$  with potassium pivalate formation of  $(\text{L4})\text{Ni}(\text{OPiv})_2$ .  $(\text{L4})\text{Ni}(\text{OPiv})_2$  (red).

**Reaction between  $[(\text{L4})_2\text{Ni}]\text{Cl}$  and potassium benzoate**

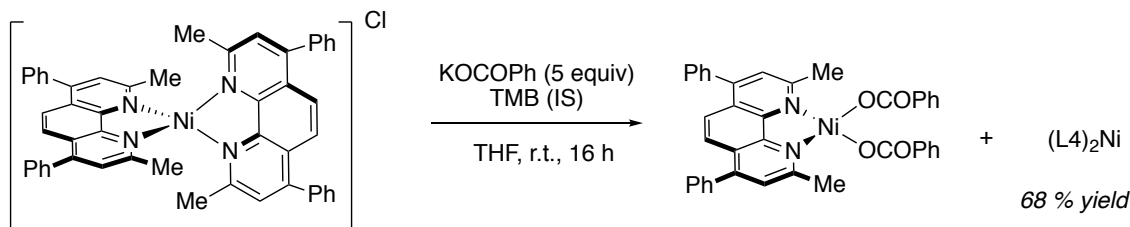

**Monitored by quantitative  $^1\text{H}$  NMR and paramagnetic  $^1\text{H}$  NMR.** In the glovebox,  $[(\text{L4})_2\text{Ni}]\text{Cl}$  (10 mg, 0.01 mmol), potassium benzoate (10 mg, 0.06 mmol, 6 equiv), and **L4** (5 mg, 0.01 mmol) were added to a 10 mL vial. A stir bar was added, and the vial was charged with 2 mL of THF. After 16 hour, the solvent was removed, redissolved in 3 mL of  $\text{C}_6\text{D}_6$  and filtered through a celite plug. To this solution, a stock solution of TMB in  $\text{C}_6\text{D}_6$  was added and the integral ratio of TMB to  $(\text{L4})_2\text{Ni}$  was measured by  $^1\text{H}$  NMR to determine  $(\text{L4})_2\text{Ni}$  had formed in 68 % yield and the only species observed in the paramagnetic NMR was  $(\text{L4})\text{Ni}(\text{OCOPh})_2$ . Conclusion: This is consistent with reaction between Ni(I) complex  $[(\text{L4})_2\text{Ni}]\text{Cl}$  and potassium benzoate to form  $(\text{L4})_2\text{Ni}$  and  $(\text{L4})\text{Ni}(\text{OCOPh})_2$ .

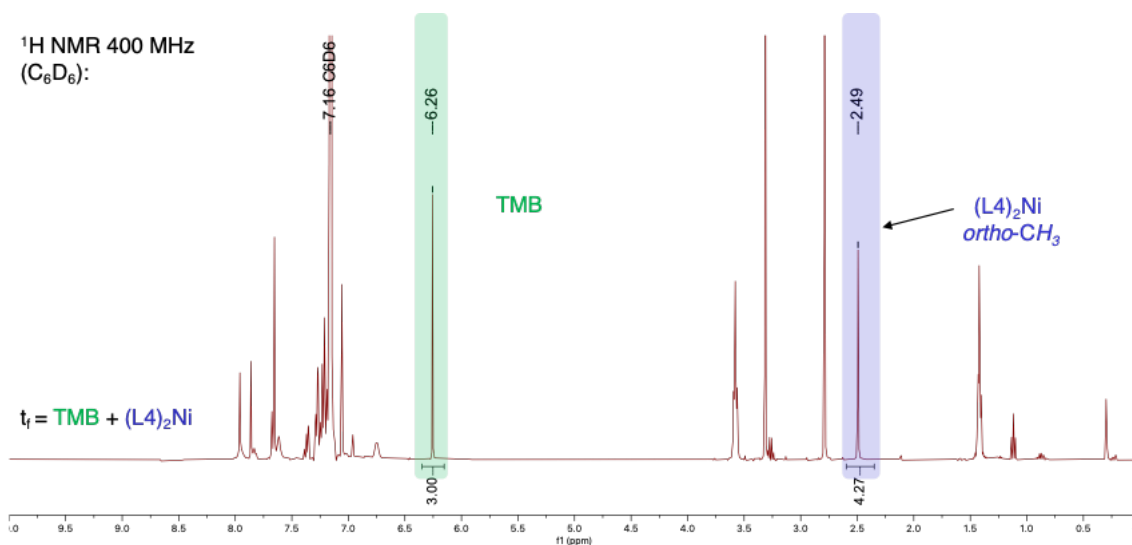

**Supplementary Figure 20.** Quantitative  $^1\text{H}$  NMR spectra of TMB and  $(\text{L4})_2\text{Ni}$  after reacting  $[(\text{L4})_2\text{Ni}]\text{Cl}$  with potassium benzoate. Internal standard trimethoxybenzene, TMB (green) and  $(\text{L4})_2\text{Ni}$  (blue).

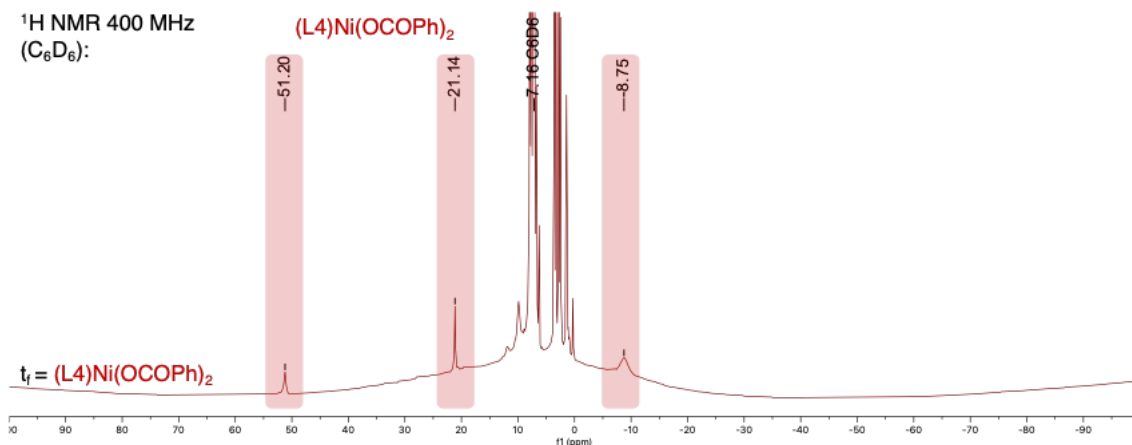

**Supplementary Figure 21.** Paramagnetic <sup>1</sup>H NMR spectra upon mixing [(**L4**)<sub>2</sub>Ni]Cl with potassium benzoate and formation of (**L4**)Ni(OCOPh)<sub>2</sub>. (**L4**)Ni(OCOPh)<sub>2</sub> (red).

### Reaction between [(**L4**)<sub>2</sub>Ni]Cl and sodium phenoxide

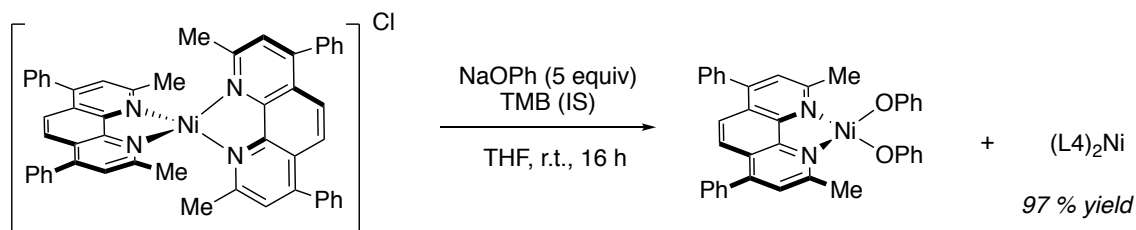

**Monitored by quantitative <sup>1</sup>H NMR and paramagnetic <sup>1</sup>H NMR.** In the glovebox, [(**L4**)<sub>2</sub>Ni]Cl (21 mg, 0.03 mmol), sodium phenoxide (15 mg, 0.13 mmol, 5 equiv), and **L4** (9 mg, 0.03 mmol) were added to a 10 mL vial. A stir bar was added, and the vial was charged with 2 mL of THF. After 16 hour, the solvent was removed, redissolved in 3 mL of C<sub>6</sub>D<sub>6</sub> and filtered through a celite plug. To this solution, a stock solution of TMB in C<sub>6</sub>D<sub>6</sub> was added and the integral ratio of TMB to (**L4**)<sub>2</sub>Ni was measured by <sup>1</sup>H NMR to determine (**L4**)<sub>2</sub>Ni had formed in 97 % yield and the only species observed in the paramagnetic NMR was (**L4**)Ni(OPh)<sub>2</sub>. Due to the insolubility of [(**L4**)Ni(OPh)<sub>2</sub>]<sub>2</sub> in C<sub>6</sub>D<sub>6</sub>, only faint traces of paramagnetic species are observed. Conclusion: This is consistent with reaction between Ni(I) complex [(**L4**)<sub>2</sub>Ni]Cl and sodium phenoxide to form (**L4**)<sub>2</sub>Ni and [(**L4**)Ni(OPh)<sub>2</sub>]<sub>2</sub>.

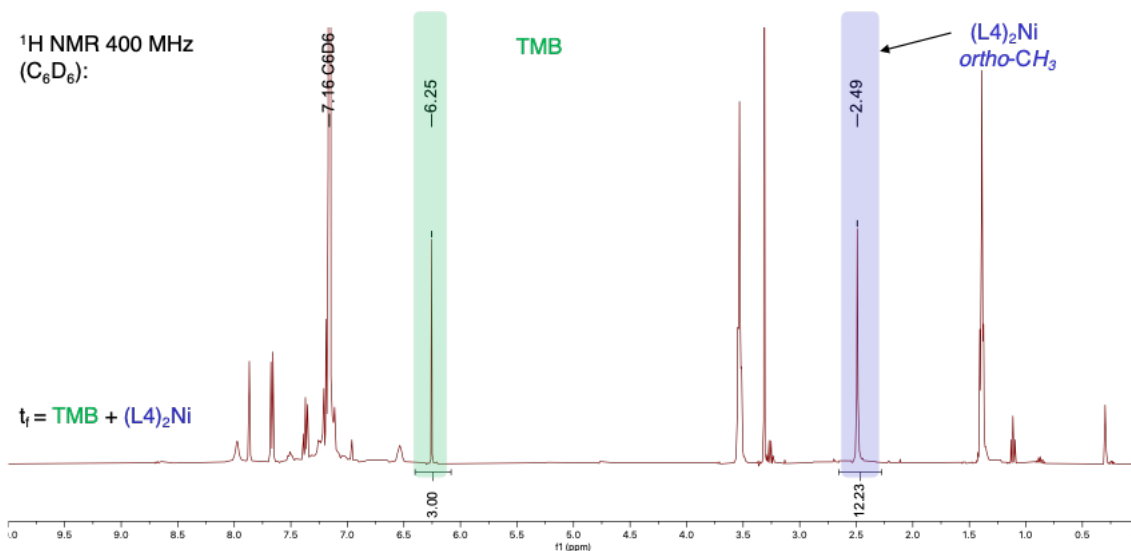

**Supplementary Figure 22.** Quantitative  $^1\text{H}$  NMR spectra of TMB and  $(\text{L}4)_2\text{Ni}$  after reacting  $[(\text{L}4)_2\text{Ni}]\text{Cl}$  with sodium phenoxide. Internal standard trimethoxybenzene, TMB (green) and  $(\text{L}4)_2\text{Ni}$  (blue).

### Reaction between $[(\text{L}3)_2\text{Ni}]\text{Cl}$ and potassium pivalate

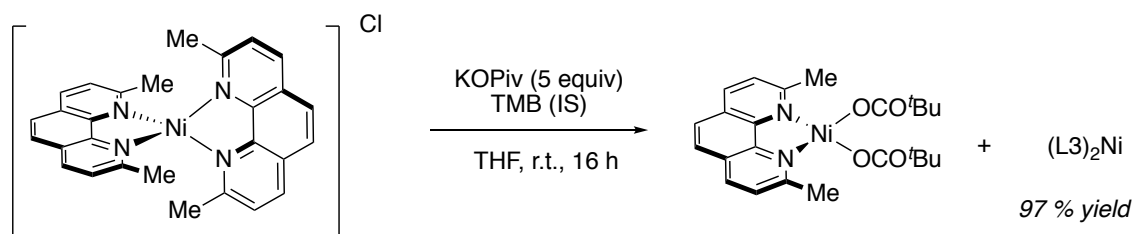

**Monitored by quantitative  $^1\text{H}$  NMR and paramagnetic  $^1\text{H}$  NMR.** In the glovebox,  $[(\text{L}3)_2\text{Ni}]\text{Cl}$  (10 mg, 0.02 mmol), potassium pivalate (12 mg, 0.10 mmol, 5 equiv), and **L3** (4 mg, 0.02 mmol) were added to a 10 mL vial. A stir bar was added, and the vial was charged with 2 mL of THF. After 16 hour, the solvent was removed, redissolved in 3 mL of  $\text{C}_6\text{D}_6$  and filtered through a celite plug. To this solution, a stock solution of TMB in  $\text{C}_6\text{D}_6$  was added and the integral ratio of TMB to  $(\text{L}3)_2\text{Ni}$  was measured by  $^1\text{H}$  NMR to determine  $(\text{L}3)_2\text{Ni}$  had formed in 96 % yield and the only species observed in the paramagnetic NMR was  $(\text{L}3)\text{Ni}(\text{OPiv})_2$ . Conclusion: This is consistent with reaction between Ni(I) complex  $[(\text{L}3)_2\text{Ni}]\text{Cl}$  and potassium pivalate to form  $(\text{L}3)_2\text{Ni}$  and  $(\text{L}3)\text{Ni}(\text{OPiv})_2$ .

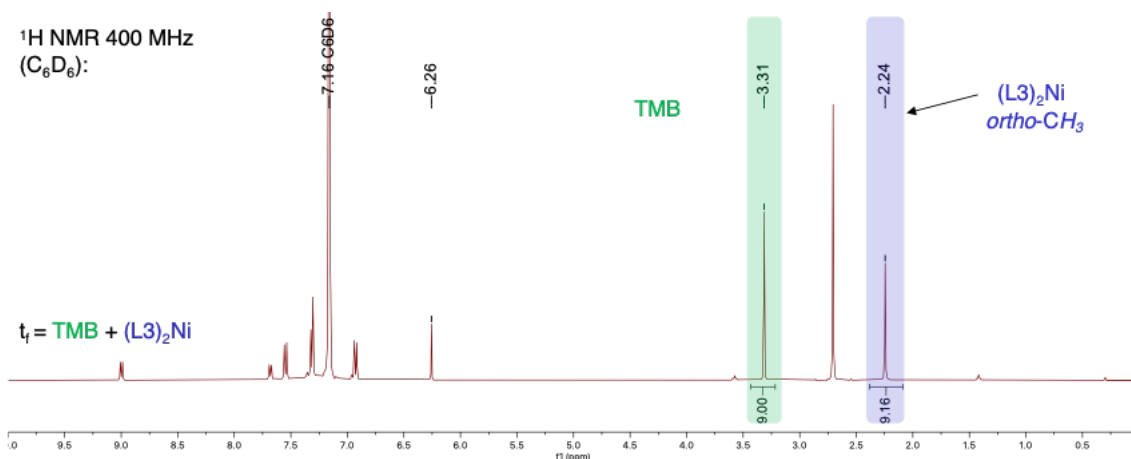

**Supplementary Figure 23.** Quantitative  $^1\text{H}$  NMR spectra of TMB and  $(\text{L}3)_2\text{Ni}$  after reacting  $[(\text{L}3)_2\text{Ni}]\text{Cl}$  with potassium pivalate. Internal standard trimethoxybenzene, TMB (green) and  $(\text{L}3)_2\text{Ni}$  (blue).

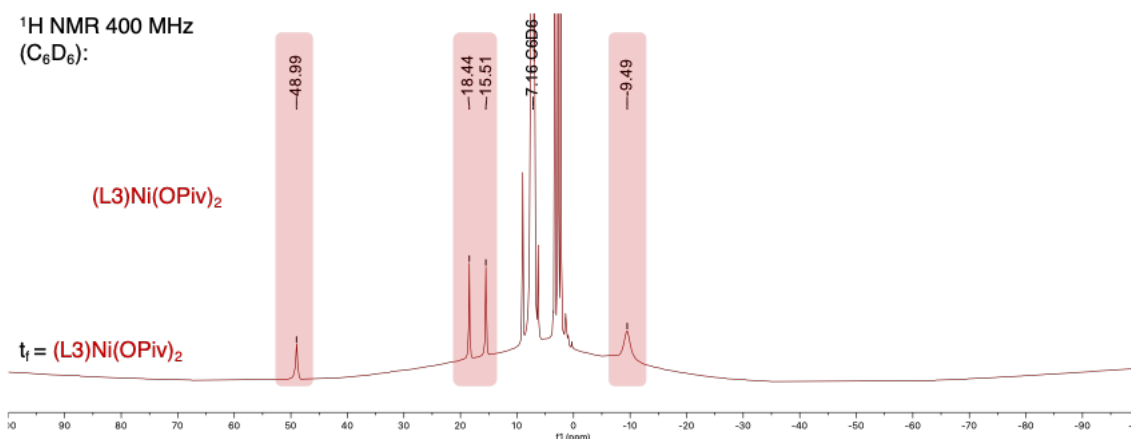

**Supplementary Figure 24.** Paramagnetic  $^1\text{H}$  NMR spectra upon mixing  $[(\text{L}3)_2\text{Ni}]\text{Cl}$  with potassium pivalate and formation of  $(\text{L}3)\text{Ni}(\text{OPiv})_2$ .  $(\text{L}3)\text{Ni}(\text{OPiv})_2$  (red).

### Solubility of Ni(II) complexes

In the glovebox (bipyridine) $\text{NiCl}_2$  (25 mg) was added to a 10 mL vial. A stir bar was added, and the vial was charged with 3 mL of THF and stirred at 900 rpm. After 1 hour, a 1.5 mL aliquot was removed and filtered through a celite plug to afford a saturated solution of (bipyridine) $\text{NiCl}_2$  in which 1 mL was transferred to a tared vial. The solvent was removed to afford the resultant solid. This representative procedure was repeated for (phenanthroline) $\text{NiCl}_2$ ,  $(\text{L}3)\text{NiCl}_2$  and  $(\text{L}4)\text{NiCl}_2$ .

**Reaction between (L4)NiBr<sub>2</sub> and zinc**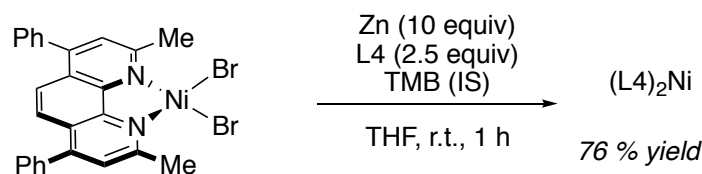

**Quantified by <sup>1</sup>H NMR.** In the glovebox, (L4)NiBr<sub>2</sub> (22 mg, 0.04 mmol), L4 (35 mg, 0.10 mmol, 2.5 equiv) and zinc (25 mg, 0.38 mmol, 10 equiv) were added to a 10 mL vial. A stir bar was added, and the vial was charged with 2 mL of THF and stirred at 900 rpm. After 1 hour, the suspension was filtered through a celite plug and the solvent was removed and redissolved in 3 mL of C<sub>6</sub>D<sub>6</sub>. To this solution, a stock solution of TMB in C<sub>6</sub>D<sub>6</sub> was added and the integral ratio of TMB to (L4)<sub>2</sub>Ni was measured by <sup>1</sup>H NMR to determine (L4)<sub>2</sub>Ni had formed in 76 % yield. Conclusion: This is consistent with full reduction of Ni(II) to Ni(0) with Zn.

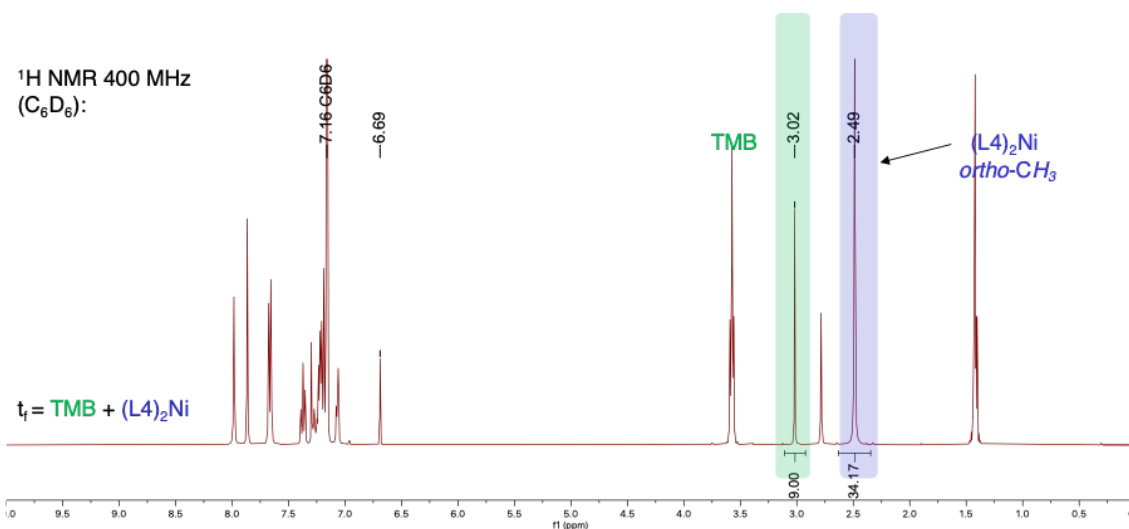

**Supplementary Figure 25.** Quantitative <sup>1</sup>H NMR spectra of TMB and (L4)<sub>2</sub>Ni after reacting (L4)NiBr<sub>2</sub> with zinc (10 equiv). Internal standard trimethoxybenzene, TMB (green) and (L4)<sub>2</sub>Ni (blue).

**Reaction between (L4)NiBr<sub>2</sub> and manganese**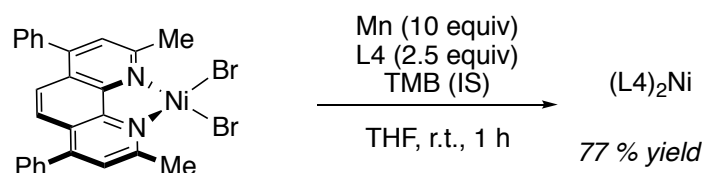

**Quantified by <sup>1</sup>H NMR.** In the glovebox, (L4)NiBr<sub>2</sub> (16 mg, 0.03 mmol), L4 (25 mg, 0.07 mmol, 2.5 equiv) and manganese (15 mg, 0.27 mmol, 10 equiv) were added to a 10 mL vial. A stir bar was added, and the vial was charged with 2 mL of THF and stirred at 900 rpm. After 1 hour, the suspension was filtered through a celite plug and the solvent was removed and redissolved in 3 mL of C<sub>6</sub>D<sub>6</sub>. To this solution, a stock solution of TMB in C<sub>6</sub>D<sub>6</sub> was added and the integral ratio

of TMB to (L4)<sub>2</sub>Ni was measured by <sup>1</sup>H NMR to determine (L4)<sub>2</sub>Ni had formed in 77 % yield. Conclusion: This is consistent with full reduction of Ni(II) to Ni(0) with Mn.

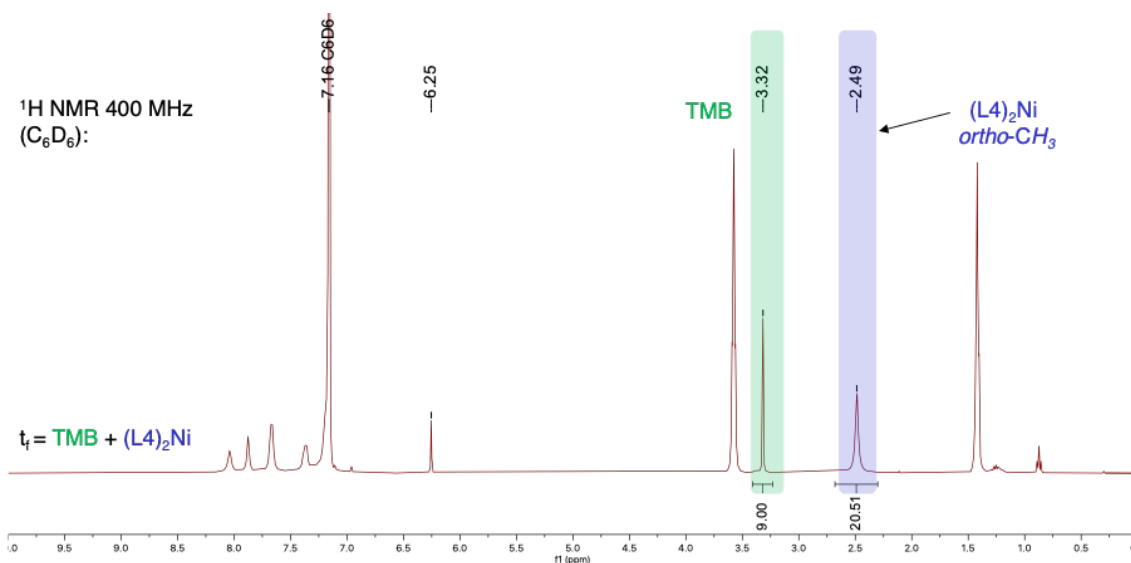

**Supplementary Figure 26.** Quantitative <sup>1</sup>H NMR spectra of TMB and (L4)<sub>2</sub>Ni after reacting (L4)NiBr<sub>2</sub> with manganese (10 equiv). Internal standard trimethoxybenzene, TMB (green) and (L4)<sub>2</sub>Ni (blue).

### No reaction between (L4)Ni(OPiv)<sub>2</sub> and Zn

**Quantified by isolation.** In the glovebox, (L4)Ni(OPiv)<sub>2</sub> (19 mg, 0.03 mmol), and zinc (20 mg, 0.31 mmol, 10 equiv) were added to a 10 mL vial. A stir bar was added, and the vial was charged with 2 mL of THF and stirred at 900 rpm. After 1 hour, the suspension was filtered through a celite plug to afford a green filtrate in which the solvent was removed. The solid was then filtered to afford (L4)Ni(OPiv)<sub>2</sub> as a green solid (18 mg, 92 % recovered yield). These reactions were performed without added L4 to assist in isolation. They were repeated with additional L4 as a control to verify this did not change the reaction outcome in which only starting material is observed, even at 16 h in which only starting material is observed (Supplementary Figure 27). Conclusion: This is consistent with no reduction of Ni(II)-(OPiv)<sub>2</sub> to Ni(0) with Zn.

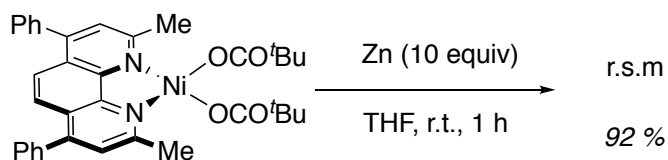



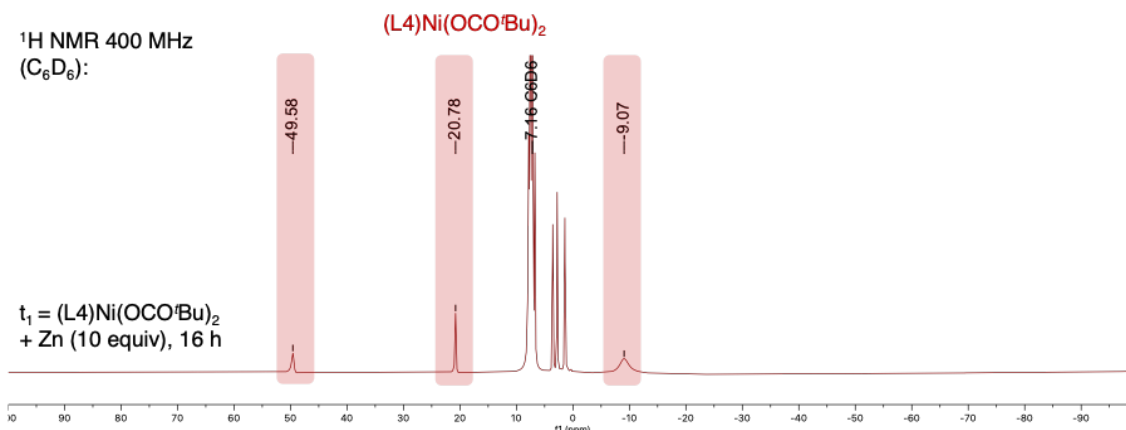

**Supplementary Figure 27.** Paramagnetic <sup>1</sup>H NMR spectra upon mixing (L4)Ni(OPiv)<sub>2</sub> with zinc (10 equiv) and isolating unreacted (L4)Ni(OPiv)<sub>2</sub> with no formation of (L4)<sub>2</sub>Ni. (L4)Ni(OPiv)<sub>2</sub> (red).

### No reaction between (L4)Ni(OPiv)<sub>2</sub> and Mn

**Quantified by isolation.** In the glovebox, (L4)Ni(OPiv)<sub>2</sub> (19 mg, 0.03 mmol), and manganese (17 mg, 0.30 mmol, 10 equiv) were added to a 10 mL vial. A stir bar was added, and the vial was charged with 2 mL of THF and stirred at 900 rpm. After 1 hour, the suspension was filtered through a celite plug to afford a green filtrate in which the solvent was removed. The solid was then filtered to afford (L4)Ni(OPiv)<sub>2</sub> as a green solid (18 mg, 97 % recovered yield). These reactions were performed without added L4 to assist in isolation. They were repeated with additional L4 as a control to verify this did not change the reaction outcome in which only starting material is observed, even at 16 h in which only starting material is observed (Supplementary Figure 28). Conclusion: This is consistent with no reduction of Ni(II)-(OPiv)<sub>2</sub> to Ni(0) with Zn.

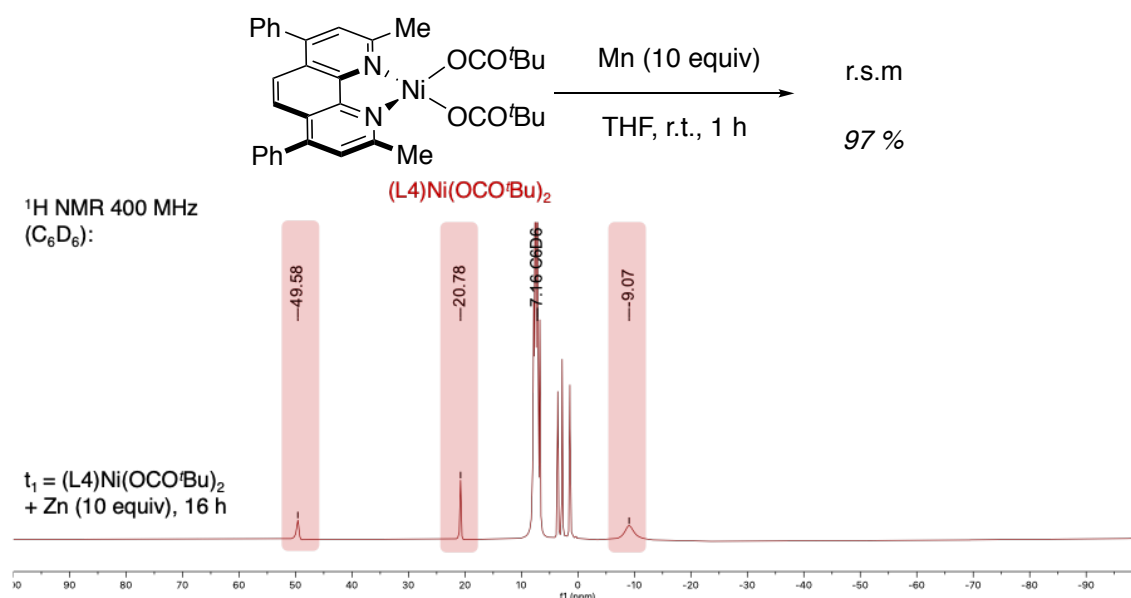

**Supplementary Figure 28.** Paramagnetic <sup>1</sup>H NMR spectra upon mixing (L4)Ni(OPiv)<sub>2</sub> with manganese (10 equiv) and isolating unreacted (L4)Ni(OPiv)<sub>2</sub> with no formation of (L4)<sub>2</sub>Ni. (L4)Ni(OPiv)<sub>2</sub> (red).

### Reaction between (L4)Ni(OPiv)<sub>2</sub> and LiBr

**Quantified by isolation.** In the glovebox, (L4)Ni(OPiv)<sub>2</sub> (31 mg, 0.05 mmol), and LiBr (17 mg, 0.20 mmol, 4 equiv) were added to a 10 mL vial. A stir bar was added, and the vial was charged with 2 mL of THF and stirred at 900 rpm. After 1 hour, the suspension was filtered through a celite plug to afford a pink filtrate from which the solvent was removed. The solid was then re-dissolved in toluene and filtered the solvent was again removed to afford (L4)Ni(Br)<sub>2</sub> as a pink solid (27 mg, 93 % yield).

Conclusion: This is consistent with full conversion of Ni(II)-(OPiv)<sub>2</sub> to Ni(II)-(Br)<sub>2</sub> with LiBr.

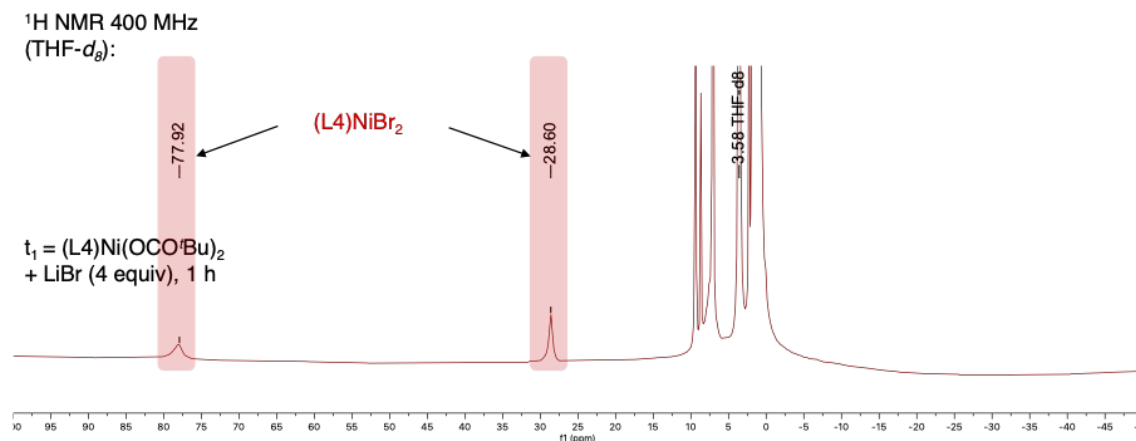

**Supplementary Figure 29.** Paramagnetic <sup>1</sup>H NMR spectra upon mixing (L4)Ni(OPiv)<sub>2</sub> with LiBr (4 equiv) indicating full conversion of (L4)Ni(OPiv)<sub>2</sub> to (L4)NiBr<sub>2</sub>. (L4)NiBr<sub>2</sub> (red).

### Reaction between (L4)Ni(OPiv)<sub>2</sub>, Zinc and LiBr

**Quantified by <sup>1</sup>H NMR.** In the glovebox, (L4)Ni(OPiv)<sub>2</sub> (12 mg, 0.02 mmol), L4 (18 mg, 0.05 mmol, 2.5 equiv), LiBr (9 mg, 0.1 mmol, 4 equiv) and zinc (13 mg, 0.20 mmol, 10 equiv) were added to a 4 mL vial. A stir bar was added, and the vial was charged with 1 mL of THF-*d*<sub>8</sub> and stirred at 900 rpm. After 1 hour, the suspension was filtered through a celite plug. To this solution, a stock solution of TMB in THF-*d*<sub>8</sub> was added and the integral ratio of TMB to (L4)Ni was measured by <sup>1</sup>H NMR to determine (L4)<sub>2</sub>Ni had formed in 80 % yield. Conclusion: This is consistent with full reduction of Ni(II) to Ni(0) with Zn. Excess ligand was used to prevent ligand sequestering by coordinatively unsaturated Zn salts.

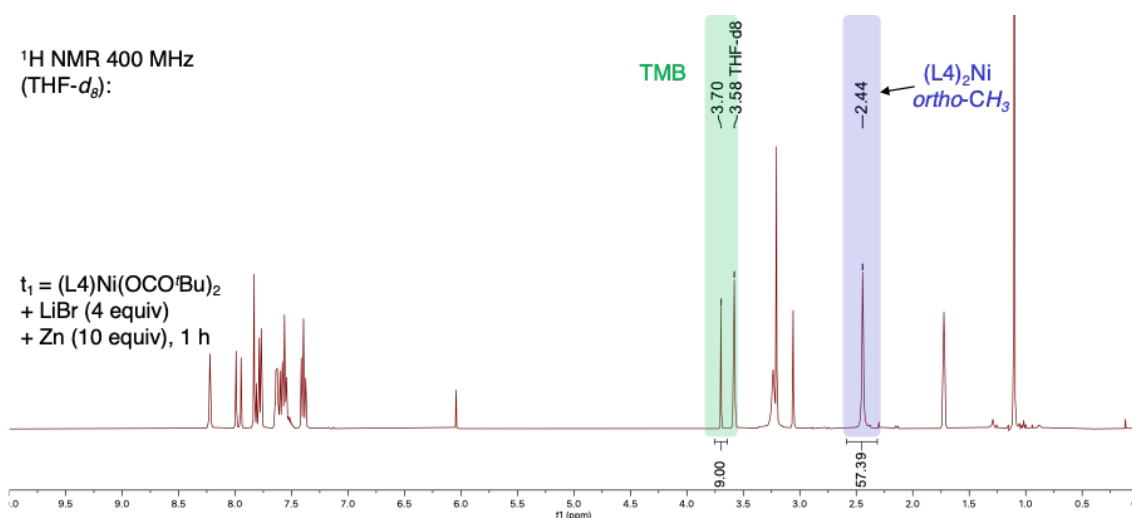

**Supplementary Figure 30.** Quantitative <sup>1</sup>H NMR spectra of TMB and ( $\text{L4}$ )<sub>2</sub>Ni after reacting ( $\text{L4}$ )Ni(OPiv)<sub>2</sub> with LiBr (4 equiv) and zinc (10 equiv). Internal standard trimethoxybenzene, TMB (green) and ( $\text{L4}$ )<sub>2</sub>Ni (blue).

#### Reaction between ( $\text{L4}$ )Ni(OPiv)<sub>2</sub>, Zinc and ZnBr<sub>2</sub>

**Quantified by <sup>1</sup>H NMR.** In the glovebox, ( $\text{L4}$ )Ni(OPiv)<sub>2</sub> (13 mg, 0.02 mmol),  $\text{L4}$  (42 mg, 0.12 mmol, 5.9 equiv), ZnBr<sub>2</sub> (15 mg, 0.07 mmol, 3 equiv) and zinc (14 mg, 0.21 mmol, 10 equiv) were added to a 10 mL vial. A stir bar was added, and the vial was charged with 3 mL of THF and stirred at 900 rpm. After 3 hours, the solvent was removed and redissolved in 1.5 mL of C<sub>6</sub>D<sub>6</sub> which was then filtered through a celite plug. To this solution, a stock solution of TMB in C<sub>6</sub>D<sub>6</sub> was added and the integral ratio of TMB to ( $\text{L4}$ )<sub>2</sub>Ni was measured by <sup>1</sup>H NMR to determine ( $\text{L4}$ )<sub>2</sub>Ni had formed in a quantitative yield. Conclusion: This is consistent with ZnBr<sub>2</sub> undergoing anion exchange with Ni(II)-OPiv species which enables the full reduction of Ni(II) to Ni(0) with Zn. Excess ligand was used to prevent ligand sequestering by coordinatively unsaturated Zn salts.

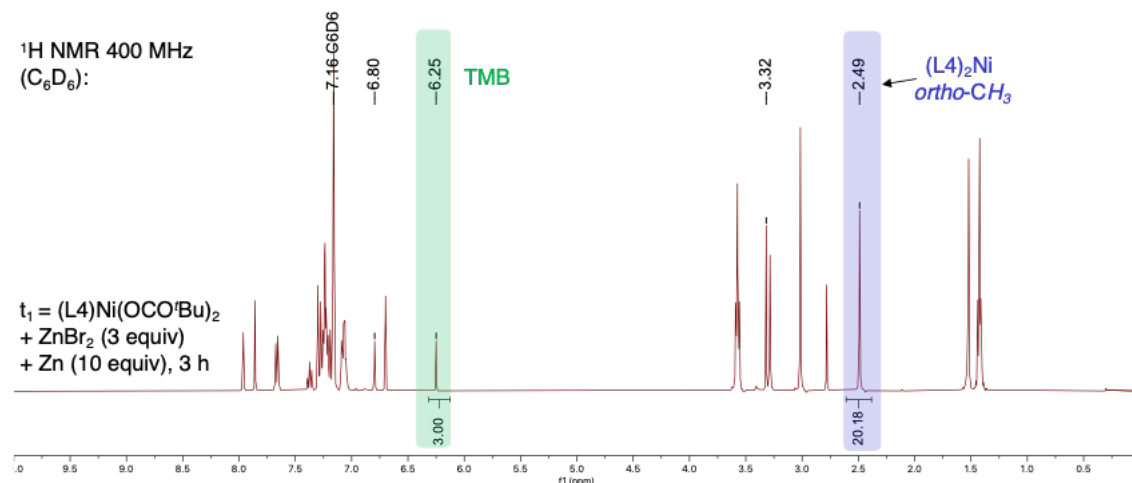

**Supplementary Figure 31.** Quantitative <sup>1</sup>H NMR spectra of TMB and ( $\text{L4}$ )<sub>2</sub>Ni after reacting ( $\text{L4}$ )Ni(OPiv)<sub>2</sub> with ZnBr<sub>2</sub> (3 equiv) and zinc (10 equiv). Internal standard trimethoxybenzene, TMB (green) and ( $\text{L4}$ )<sub>2</sub>Ni (blue).

**Reaction between (L4)<sub>2</sub>Ni and Zinc Chloride**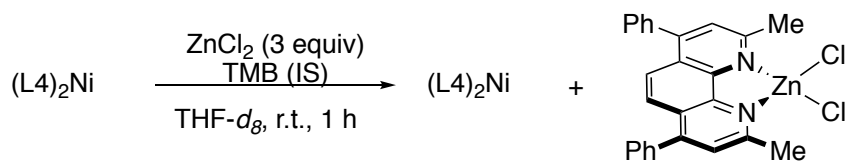

**Monitored by quantitative <sup>1</sup>H NMR and paramagnetic <sup>1</sup>H NMR.** In the glovebox, (L4)<sub>2</sub>Ni (11.2 mg, 0.01 mmol) and TMB (2 mg, internal standard) were added to a 4 mL vial with 1.5 mL of THF-*d*<sub>8</sub>. The solution was transferred to a J-Young NMR tube and the initial integration of (L4)<sub>2</sub>Ni and TMB was recorded. The J-Young NMR tube was brought back into the glovebox and added to a vial containing ZnCl<sub>2</sub> (5.6 mg, 0.04 mmol) and stirred for 1 h before transferring back into the J-Young NMR tube and analyzed by <sup>1</sup>H NMR. After 1h, (L4)<sub>2</sub>Ni remained (46 %) along with formation of (L4)ZnCl<sub>2</sub> (39 %) with no paramagnetic species generated (Supplementary Figure 32. t1. Conclusion: This is consistent with ligand sequestering of ZnCl<sub>2</sub> from (L4)<sub>2</sub>Ni.

**Independent synthesis of (L4)ZnCl<sub>2</sub>.** In the glovebox, ZnCl<sub>2</sub> (66 mg, 0.48 mmol), L4 (177 mg, 0.49 mmol, 1.02 eq) were added to a 10 mL vial with a stirbar. The vial was charged with THF (3 mL) to afford a yellow suspension that was stirred overnight to afford a white suspension. After 16 h the suspension was filtered and washed with THF (1 mL) and pentane (3 ml x 2) and dried under vacuum to afford (L4)ZnCl<sub>2</sub> (88 mg, 37 % yield) as a white solid. <sup>1</sup>H NMR (400 MHz, THF-*d*<sub>8</sub>) δ 7.99 (s, 2H), 7.93 (s, 2H), 7.74 – 7.45 (m, 11H), 3.17 (s, 6H).

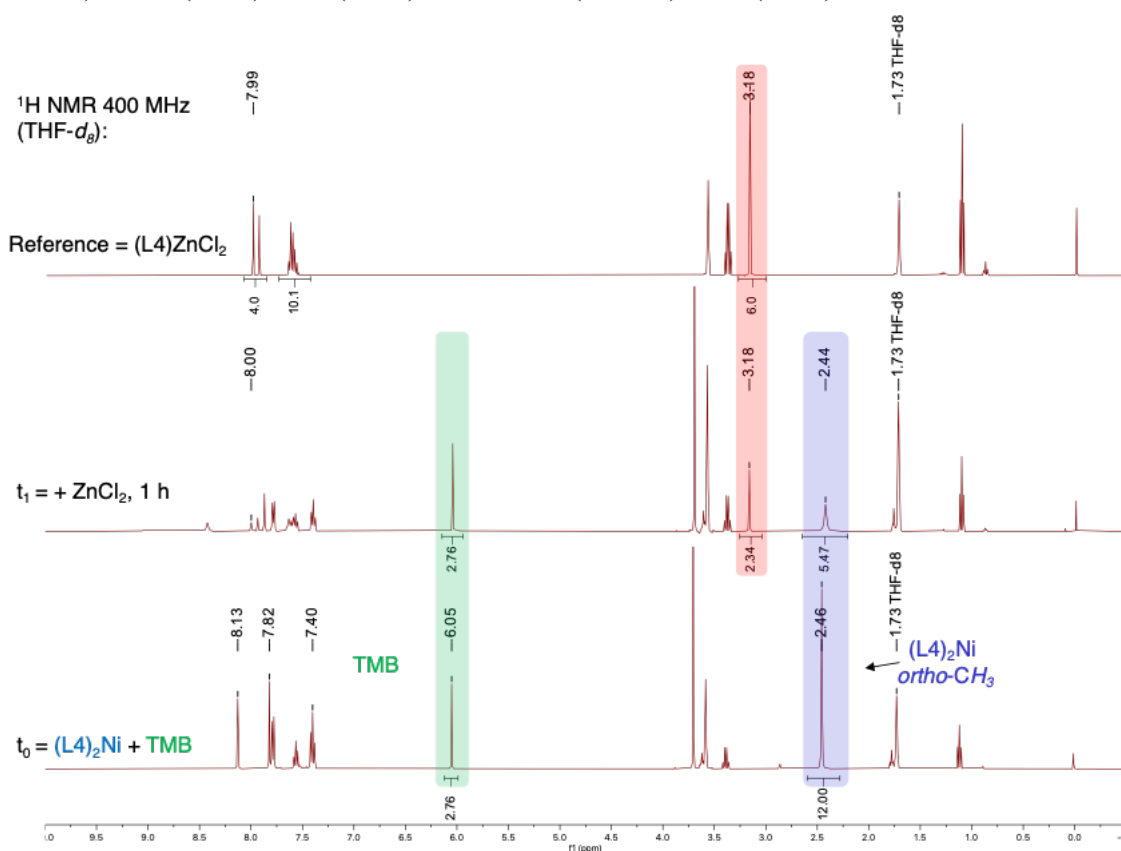

**Supplementary Figure 32.** Quantitative  $^1\text{H}$  NMR spectra of TMB and  $(\text{L4})_2\text{Ni}$  indicating ligand sequestering by  $\text{ZnCl}_2$  from  $(\text{L4})_2\text{Ni}$ . Internal standard trimethoxybenzene, TMB (green) and  $(\text{L4})_2\text{Ni}$  (blue),  $(\text{L4})\text{ZnCl}_2$ .

### Reaction between $(\text{L4})_2\text{Ni}$ and Manganese Chloride

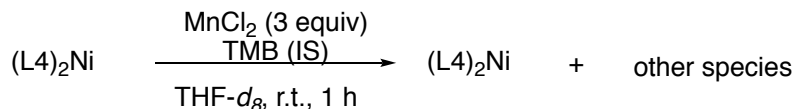

**Monitored by quantitative  $^1\text{H}$  NMR and paramagnetic  $^1\text{H}$  NMR.** In the glovebox,  $(\text{L4})_2\text{Ni}$  (10.0 mg, 0.01 mmol) and TMB (2 mg, internal standard) were added to a 4 mL vial with 1.5 mL of THF- $d_8$ . The solution was transferred to a J-Young NMR tube and the initial integration of  $(\text{L4})_2\text{Ni}$  and TMB was recorded. The J-Young NMR tube was brought back into the glovebox and added to a vial containing  $\text{MnCl}_2$  (4.3 mg, 0.03 mmol) and stirred for 1 h before transferring back into the J-Young NMR tube and analyzed by  $^1\text{H}$  NMR. After 1h,  $(\text{L4})_2\text{Ni}$  remained (71 %) with no paramagnetic species observable. Conclusion: This is consistent with ligand sequestering of  $\text{MnCl}_2$  from  $(\text{L4})_2\text{Ni}$ , in which the Mn complexes formed are either insoluble or have very broad paramagnetic  $^1\text{H}$  NMR spectra. A very broad paramagnetic spectra would be consistent with low spin  $d^5$  complex  $(\text{L4})\text{MnCl}_2$ . The existence of these paramagnetic species is also consistent with extensive line broadening observed in the diamagnetic  $^1\text{H}$  NMR spectra.

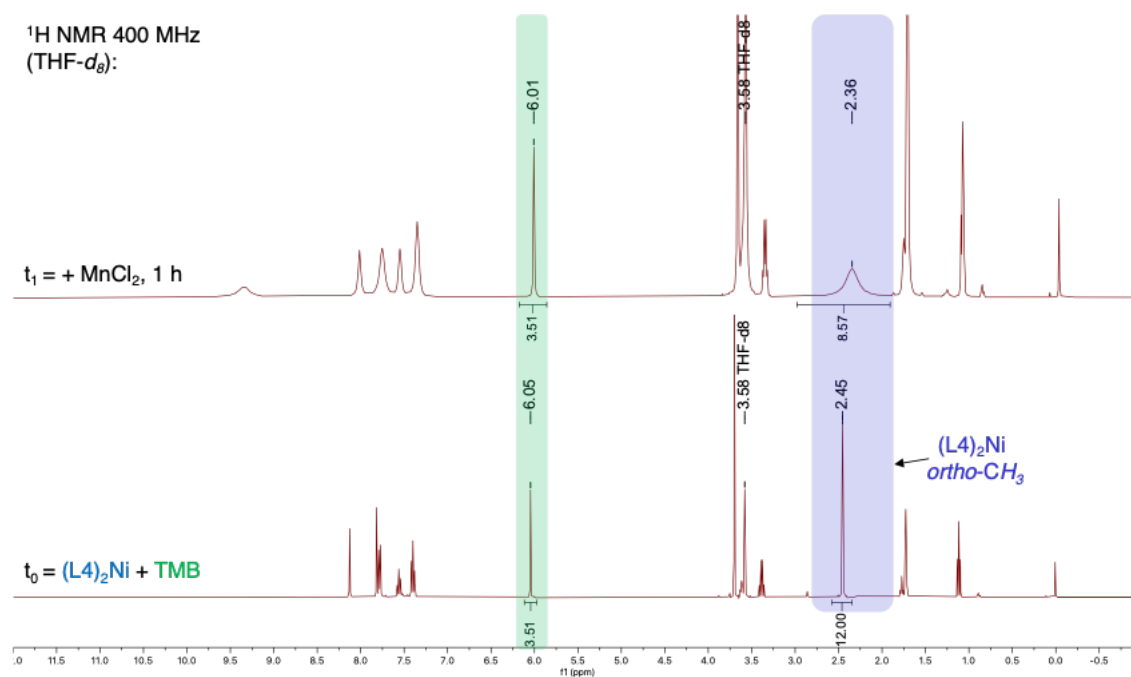

**Supplementary Figure 33.** Quantitative  $^1\text{H}$  NMR spectra of TMB and  $(\text{L4})_2\text{Ni}$  indicating ligand sequestering by  $\text{MnCl}_2$  from  $(\text{L4})_2\text{Ni}$ . Internal standard trimethoxybenzene, TMB (green) and  $(\text{L4})_2\text{Ni}$  (blue).

Go to: [\[table of contents\]](#) [\[references\]](#)

$^1\text{H}$  NMR 400 MHz  
(THF- $d_6$ ):

$t_1 = + \text{MnCl}_2$ , 1 h

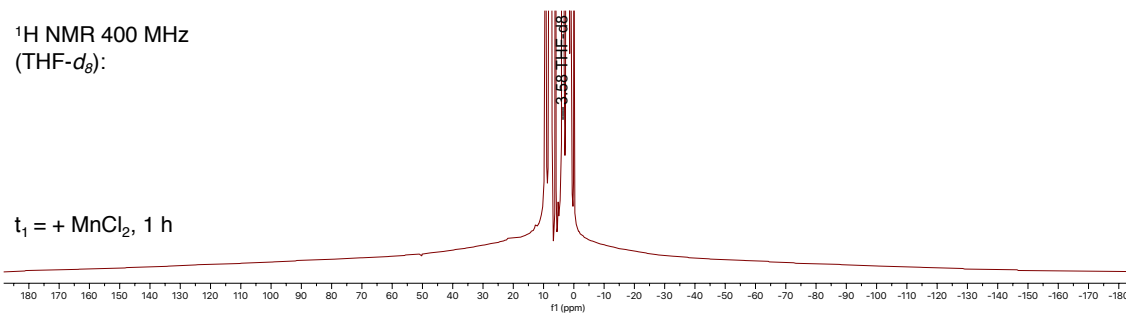

**Supplementary Figure 34.** Paramagnetic  $^1\text{H}$  NMR spectra indicating no oxidation of  $(\text{L4})_2\text{Ni}$  to  $[(\text{L4})_2\text{Ni}]\text{Cl}$ .

## Catalytic reactions

### Migratory reductive coupling of aryl and alkyl bromides using L4

**Representative Procedure:** In the glovebox NiI<sub>2</sub> (8 mg, 0.025 mmol, 10 mol%) and L4 (9 mg, 0.025 mmol, 10 mol%) or (L4)Ni(OPiv)<sub>2</sub> (16 mg, 0.025 mmol, 10 mol%) were added to a 10 mL vial. In addition, zinc dust (25 mg, 0.38 mmol, 1.5 equiv.), *n*-Bu<sub>4</sub>NBr (81 mg, 0.25 mmol, 1.0 equiv.) and KOPIv (35 mg, 0.25 mmol, 1 equiv) when applicable, were added with DMA (1 mL). In a separate 4 mL vial a stock solution of decane (72 mg, 0.5 mmol) and (2-bromoethyl)benzene (93 mg, 0.5 mmol) was dissolved in 2 mL DMA from which 1 mL (0.25 mmol, 1 equiv.) was added to the reaction vial, additionally 50 µl aliquot of the stock solution was removed for GC-FID analysis to establish an initial ratio of starting material to internal standard. Finally, aryl bromide (47 mg, 0.3 mmol, 1.2 equiv.) was added to the reaction vial. The reaction was stirred at 900 rpm at room temperature for 5 h in the glovebox. At given time intervals reaction monitoring was carried out by quenching 50 µl aliquots with HCl, after dilution with EtOAc and filtration, samples were analyzed by GC-FID to determine conversion of starting material and yield of cross coupled product.

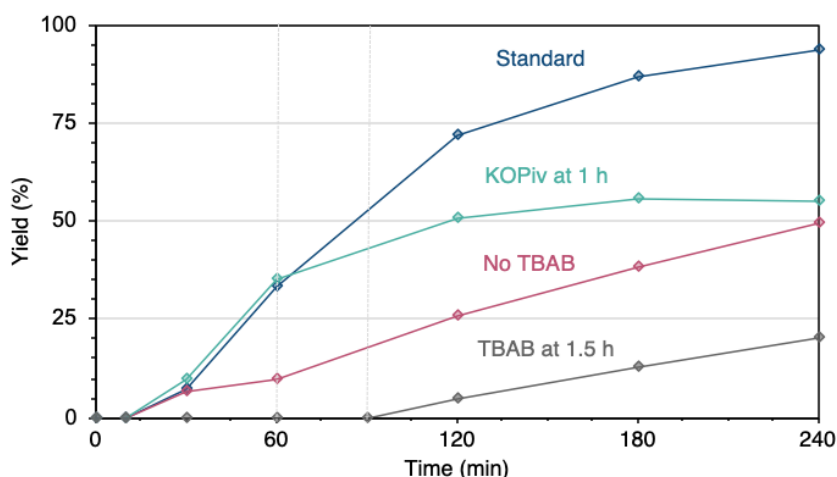

**Supplementary Figure 35.** Monitoring the reductive cross-coupling of alkyl bromides and aryl bromides by GC-FID.

**Poisoning Experiments:** Following the representative procedure as above using 0.5 mmol (2-bromoethyl)benzene without TBAB and decane added, the reactions were performed with additives (KOPIv (14 mg, 20 mol %), NaOPh (12 mg, 20 mol %), NaOCOPh (14 mg, 20 mol %)) from the onset and analyzed by <sup>1</sup>H NMR after 5 hours. In each case a significant reduction in yield is observed when compared to the reaction monitored without TBAB (Supplementary Figure 35, pink trace).

Go to: [\[table of contents\]](#) [\[references\]](#)

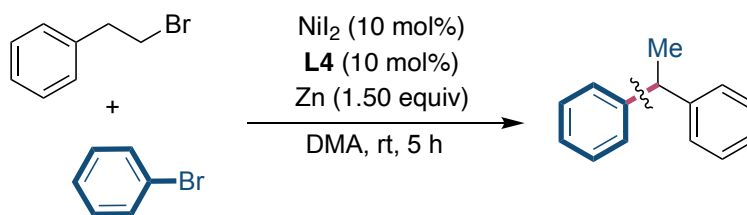

| Entry | Deviation from standard conditions | Yield (%) |
|-------|------------------------------------|-----------|
| 1     | 0.4 equiv KOiiv                    | 16        |
| 2     | 0.4 equiv NaOPh                    | 20        |
| 3     | 0.4 equiv NaOCOPh                  | 8         |

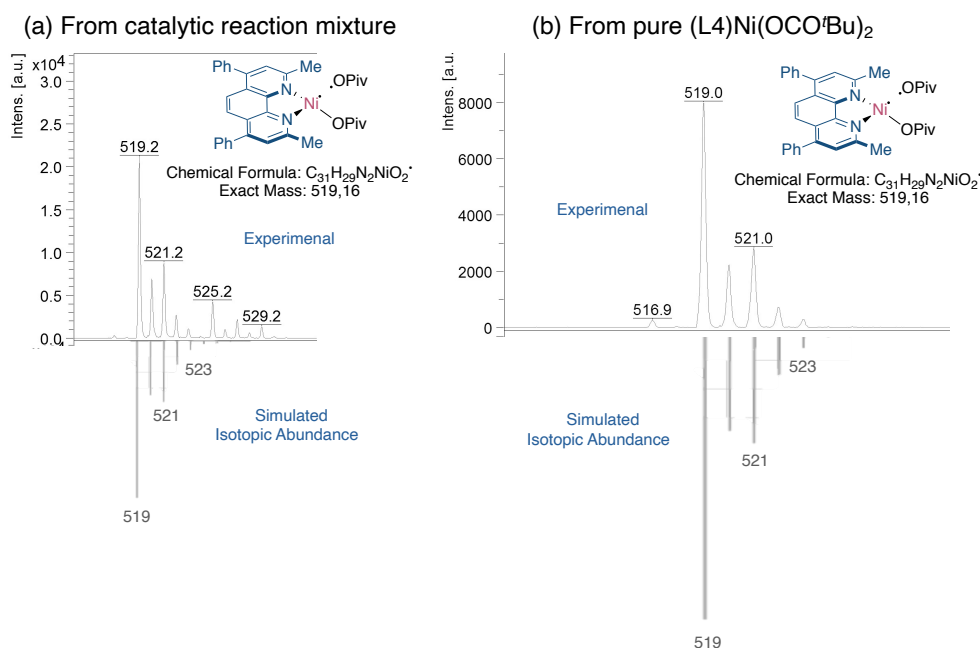

**Supplementary Figure 36.** MALDI-MS spectra of (L4)Ni(OPiv)<sub>2</sub>. (a) Mass fragment of (L4)Ni(OPiv)<sub>2</sub> from the standard reaction with added potassium pivalate after 2 hours. (b) Mass fragment of isolated (L4)Ni(OPiv)<sub>2</sub>.

**EPR analysis:** 3 sets of experiments were performed and analyzed by EPR following the representative procedure as above using 0.5 mmol (2-bromoethyl)benzene to gain additional information about Ni speciation. In each experiment, the reaction was stirred at 900 rpm at room temperature for 2 h in the glovebox. A 0.5 mL aliquot was taken and diluted with 0.5 mL THF and analyzed by EPR (−196°C). *Experiment 1:* Added KOiiv (35 mg, 1 equiv), without NBu<sub>4</sub>Br. *Experiment 2:* Without KOiiv, with NBu<sub>4</sub>Br (81 mg, 1 equiv). *Experiment 3:* Without KOiiv and without NBu<sub>4</sub>Br. **Analysis:** In experiments 2 and 3 that do not contain KOiiv, an EPR signal is observed that is consistent with a resting state Ni(I) species. While the exact operative mechanism is still ambiguous and we are unsure of the exact nature of this species, we identify it is not [(L4)<sub>2</sub>Ni]Br as the spectra do not match and could not identify an analogous EPR spectra reported in the literature. In the reaction conditions with KOiiv added, no EPR signal is observed which we suspect is due to anion exchange with this resting state complex followed by disproportionation as MALDI-MS of the reaction previously identified the formation of (L4)Ni(OPiv)<sub>2</sub>.



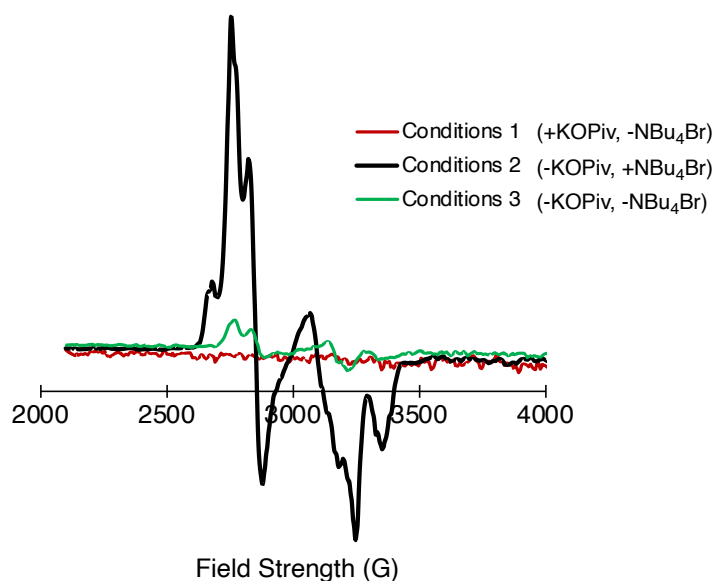

**Supplementary Figure 37.** Continuous wave (CW) X-Band EPR spectra of the various reaction conditions with KOPiv or NBu<sub>4</sub>Br added.

#### Catalytic carboxylation of allylic alcohols with CO<sub>2</sub> using L4

**Representative Procedure:** In the glovebox to an oven-dried schlenk tube containing a stirring bar was added NiBr<sub>2</sub>DME (6 mg, 0.020 mmol, 10 mol%) and L4 (19 mg, 0.052 mmol, 26 mol%) or (L4)Ni(OPiv)<sub>2</sub> (12 mg, 0.020 mmol, 10 mol%) and L4 (12 mg, 0.032 mmol, 16 mol%). Additionally, Zn dust (14 mg, 0.240 mmol, 1.2 equiv.), MgCl<sub>2</sub> (19 mg, 0.200 mmol, 1 equiv.) and KOPiv (34 mg, 0.240 mmol, 1.2 equiv.) were added when applicable. The tube was taken out of the glovebox and connected to a Schlenk line where it was evacuated and back-filled under CO<sub>2</sub> flow 3 times. (E)-oct-2-en-1-ol (26 mg, 0.200 mmol, 1 equiv.), and DMF (2 mL) were added under CO<sub>2</sub> flow. Once added, the schlenk tube was closed under a flow of CO<sub>2</sub> (approx. 1 bar overpressure) and stirred at 40 °C for 16 h. The mixture was quenched with 2M HCl and diluted with EtOAc. An aliquot of the solution was analyzed by <sup>1</sup>H-NMR spectroscopy using TMB as internal standard to determine the yield of the expected product.

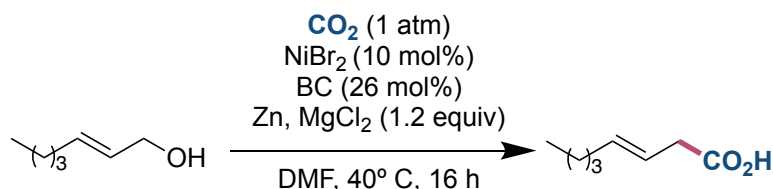

| Entry | Deviation from standard conditions                                  | Yield (%) <sup>a</sup> |
|-------|---------------------------------------------------------------------|------------------------|
| 1     | None                                                                | 64                     |
| 2     | No MgCl <sub>2</sub>                                                | 15                     |
| 3     | 0.4 equiv KO <sup>t</sup> Piv, No MgCl <sub>2</sub>                 | 9                      |
| 4     | Ni(OPiv) <sub>2</sub> i.o. NiBr <sub>2</sub> , No MgCl <sub>2</sub> | 0                      |
| 5     | Ni(OPiv) <sub>2</sub> i.o. NiBr <sub>2</sub>                        | 45                     |
| 6     | Ni(COD) <sub>2</sub> i.o. NiBr <sub>2</sub> , No MgCl <sub>2</sub>  | 0                      |
| 7     | Ni(COD) <sub>2</sub> i.o. NiBr <sub>2</sub>                         | 61                     |

**Supplementary Figure 38.** Various conditions of the reductive carboxylation of allylic alcohols with CO<sub>2</sub>. <sup>a</sup> <sup>1</sup>H NMR yields using 1,3,5-trimethoxybenzene as internal standard. i.o., instead of.

### Catalytic carboxylation of dienes with CO<sub>2</sub> using L5 and L6

**Preface:** Extending these results to reductive coupling reactions that form Ni-carboxylate complexes on-cycle with different *N*-based ligands than we used in this case study we investigated the reductive carboxylation of dienes with CO<sub>2</sub>.<sup>5</sup> In this report the authors performed control experiments (Supplementary Table 1 entries 1, 2, 3) that highlighted the importance of halide sources for productive catalysis using 2-methyl-4,7-diphenyl-1,10-phenanthroline (L5) which we show below for convenience (Supplementary Figure 39). Halide containing precatalyst NiBr<sub>4</sub>(TBA)<sub>2</sub> was optimal (Supplementary Figure 39, entry 1) but importantly, no product was obtained without inorganic halide sources (i.e using Ni(COD)<sub>2</sub> without TBAB; Supplementary Figure 39 entry 2) and catalytic activity could be recovered by adding TBAB as a halide source (60 % yield, Supplementary Figure 39 entry 3). They further show non-ortho substituted phenanthroline ligands could afford the dicarboxylated product (56 % yield, Supplementary Figure 39 entry 4). Investigating if these reactivity trends extended to non-ortho substituted ligands, entry 4 was repeated which afforded the dicarboxylated product formed in 52 % yield and using Ni(COD)<sub>2</sub> as the precatalyst afforded no product (Supplementary Figure 39 entry 5) consistent with inorganic halide sources being a requirement for productive catalysis in reductive carboxylation reactions that form on-cycle Ni-carboxylate complexes with L4 (bathocuproine), L5 (2-methyl-4,7-diphenyl-1,10-phenanthroline) and L6 (bathrophenanthroline).

**Representative Procedure:** An oven-dried Schlenk tube equipped with a magnetic stirring bar was charged with Mn dust (16.5 mg, 0.3 mmol, 1.5 equiv), ligand (either 2-methyl-4,7-diphenyl-1,10-phenanthroline (L5) (3.5 mg, 0.01 mmol, 0.05 equiv) or bathrophenanthroline (L6) (3.3 mg, 0.01 mmol, 0.05 equiv) and Ni source (0.01 mmol, 0.05 equiv). The schlenk tube was filled with carbon dioxide by applying three cycles of evacuation and filling with CO<sub>2</sub>. Subsequently, 1-phenyl-1,3-butadiene (1a, 0.20 mmol, 1 equiv) was added by syringe followed by DMA (0.40 mL) with a constant flow of CO<sub>2</sub>. The Schlenk flask was tightly sealed and stirred at 50 °C for 60 hours after which it was quenched by careful addition of 2 M aq. HCl sol and internal standard

added. The crude was extracted with EtOAc, and a sample of such solution was concentrated and analyzed by  $^1\text{H}$  NMR.

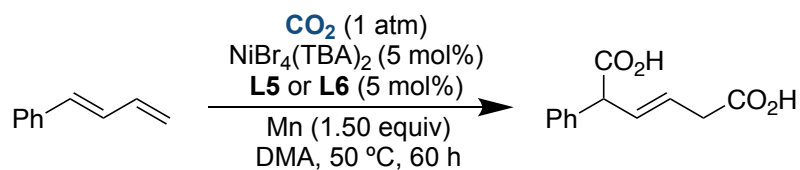

| Entry | Deviation from standard conditions                                                 | Yield (%)       |
|-------|------------------------------------------------------------------------------------|-----------------|
| 1     | using <b>L5</b> ,                                                                  | 79 <sup>a</sup> |
| 2     | using <b>L5</b> and Ni(COD) <sub>2</sub> i.o. NiBr <sub>4</sub> (TBA) <sub>2</sub> | 0 <sup>a</sup>  |
| 3     | Ni(COD) <sub>2</sub> and 10 % TBAB                                                 | 60 <sup>a</sup> |
| 4     | using <b>L6</b>                                                                    | 56 <sup>a</sup> |
| 5     | using <b>L6</b> and Ni(COD) <sub>2</sub> i.o. NiBr <sub>4</sub> (TBA) <sub>2</sub> | 0 <sup>b</sup>  |

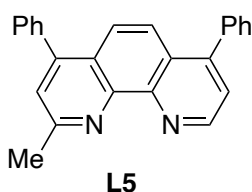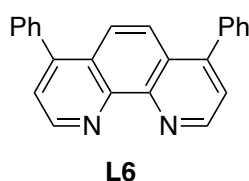

**Supplementary Figure 39.** Various conditions of the reductive carboxylation of dienes with CO<sub>2</sub>. <sup>a</sup> yields from control experiments previously published (Supplementary Table 1, entries 1, 2, 3). <sup>b</sup>  $^1\text{H}$  NMR yields using 1,3,5-trimethoxybenzene as internal standard. i.o. = instead of

### Reductive Coupling of Aryl and Alkyl Bromides Using dtbbpy

**Representative Procedure:** In the glovebox, an oven-dried Schlenk tube equipped with a magnetic stirring bar was charged with Mn dust (54.9 mg, 1.0 mmol, 2.0 equiv), dtbbpy (13.4 mg, 0.05 mmol, 0.1 equiv) and NiI<sub>2</sub>xH<sub>2</sub>O (20.2 mg, 0.05 mmol, 0.1 equiv), 1-bromooctane (96.6 mg, 0.5 mmol, 1 mmol), phenyl bromide (78.6 mg, 0.5 mmol, 1 equiv), pyridine (4 ul, 0.05 mmol, 0.1 equiv). DMPU was then added and the reaction was heated at 80 °C for 16 hours after which it was quenched by careful addition of 2 M aq. HCl sol and internal standard TMB added. The crude was extracted with EtOAc, and a sample of such solution was concentrated and analyzed by  $^1\text{H}$  NMR.

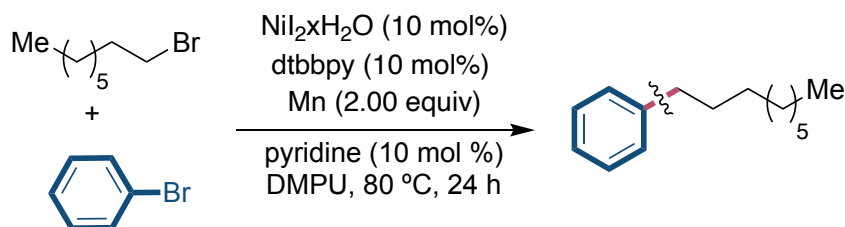

| Entry | Deviation from standard conditions | Yield (%) <sup>a</sup> |
|-------|------------------------------------|------------------------|
| 1     | none                               | 60                     |
| 2     | 0.2 equiv NaOPh                    | 5                      |
| 3     | 0.2 equiv NaOCOPh                  | 5                      |

**Supplementary Figure 40.** Various conditions of the reductive coupling of aryl and alkyl bromides. <sup>a</sup> <sup>1</sup>H NMR yields using 1,3,5-trimethoxybenzene as internal standard.

### Reductive Coupling of Aryl Bromides and Alkyl Tosylates Using dtbbpy

**Representative Procedure:** In the glovebox, an oven-dried Schlenk tube equipped with a magnetic stirring bar was charged with alkyl tosylate (0.1 mmol), NiBr<sub>2</sub>·glyme (0.005 mmol, 1.5 mg) or Ni(COD)<sub>2</sub> (0.005 mmol, 1.4 mg), 4,4'-ditert-butyl-2,2'-bipyridine (0.005 mmol, 1.3 mg), Mn powder (0.2 mmol, 11.0 mg) and when appropriate KI (0.1 mmol, 16.6 mg), and/or potassium pivalate (0.02 mmol, 2.8 mg). Dimethylacetamide (0.5 mL) and 4-ethylpyridine (0.1 mmol, 10.8 mg) were added via syringe, followed by the phenyl bromide (0.1 mmol, 15.7 mg). The reaction was stirred under Ar at 80 °C for 18 h, after which the solution was cooled and diluted with MeCN and filtered through a pad of Celite. This solution was concentrated and a stock solution of TMB in CDCl<sub>3</sub> was added as internal standard, and analyzed by <sup>1</sup>H NMR.

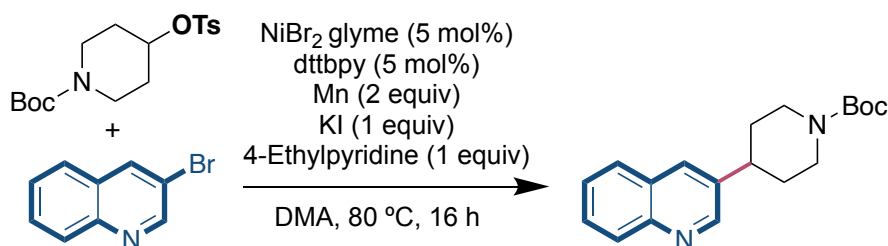

| Entry | Deviation from standard conditions                         | Yield (%) <sup>a</sup> |
|-------|------------------------------------------------------------|------------------------|
| 1     | None                                                       | 75                     |
| 2     | No KI                                                      | 19                     |
| 3     | 0.2 equiv KOPIv, No KI                                     | 14                     |
| 4     | 0.2 equiv KOPIv                                            | 35                     |
| 5     | Ni(COD) <sub>2</sub> i.o. NiBr <sub>2</sub> (glyme), no KI | 5                      |
| 6     | Ni(COD) <sub>2</sub> i.o. NiBr <sub>2</sub> (glyme)        | 56                     |

**Supplementary Figure 41.** Various conditions of the reductive coupling of aryl bromides and alkyl tosylates. <sup>a</sup> <sup>1</sup>H NMR yields using 1,3,5-trimethoxybenzene as internal standard.

## IR, UV-VIS, and Cyclic Voltammetry

### Infrared Spectroscopy

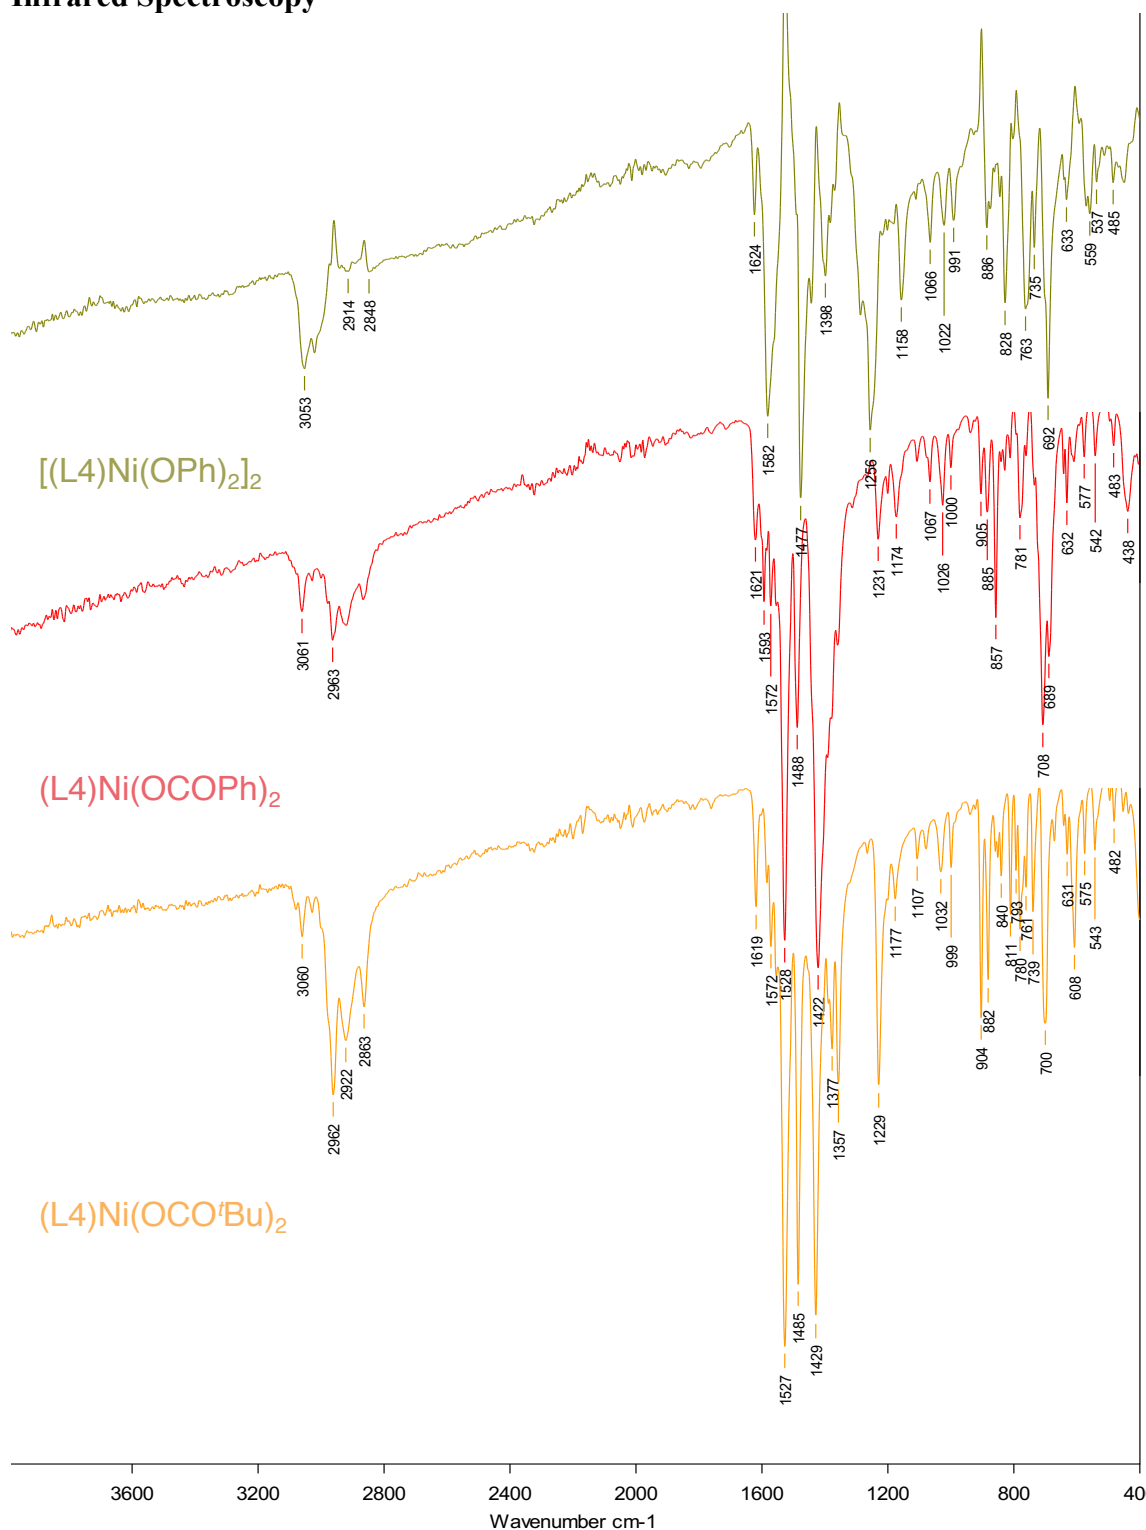

**Supplementary Figure 42.** Stack IR spectra of [(L4)Ni(OPh)<sub>2</sub>]<sub>2</sub>, (L4)Ni(OCOPh)<sub>2</sub>, and (L4)Ni(OPiv)<sub>2</sub>.

## UV-VIS Spectroscopy

A. UV-VIS Spectra of  $[(L4)_2Ni]Br$  and  $[(L4)_2Ni]Cl$

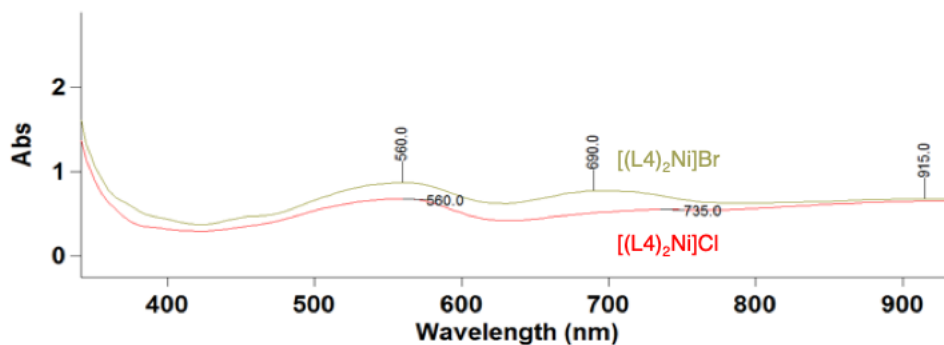

B. UV-VIS Spectra of  $(L4)Ni(OCO'Bu)_2$  and  $(L4)Ni(OCOPh)_2$

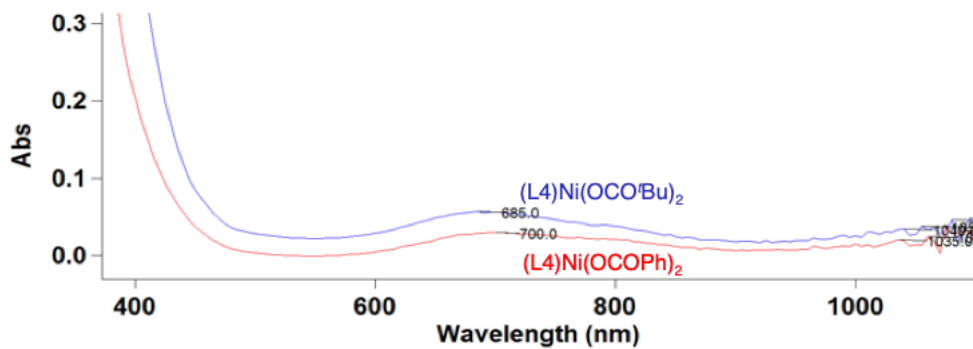

**Supplementary Figure 43.** UV-VIS spectra of  $[(L4)_2Ni]Br$ ,  $[(L4)_2Ni]Cl$ ,  $(L4)Ni(OPiv)_2$  and  $(L4)Ni(OCOPh)_2$ .

## Cyclic Voltammetry

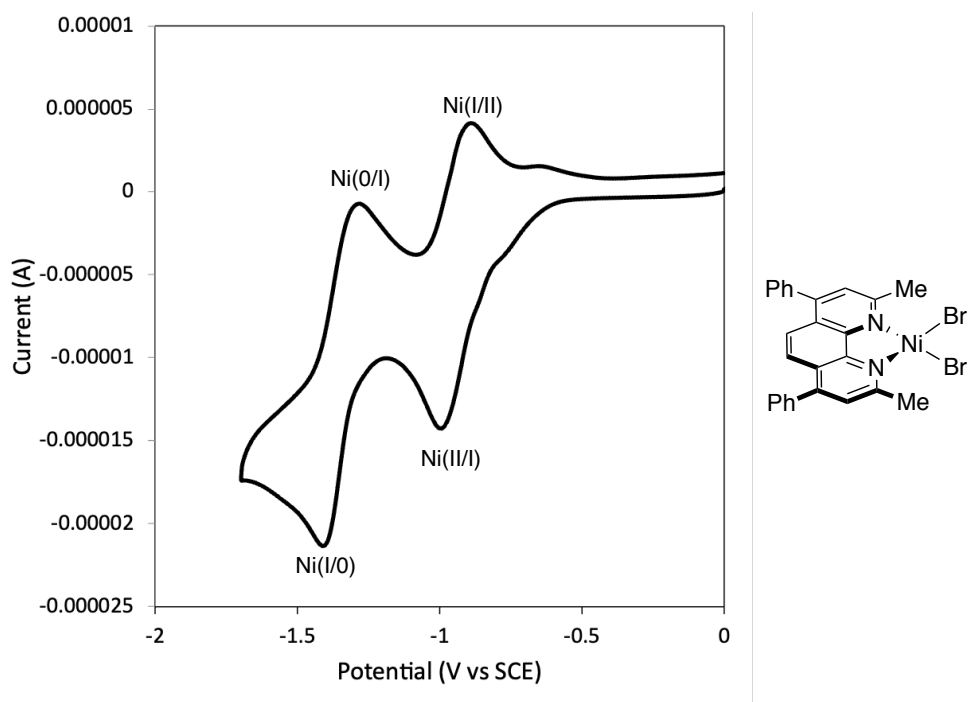

**Supplementary Figure 44.** Cyclic voltammogram of  $(L4)NiBr_2$ . Voltammograms were taken using a glassy carbon working electrode in a 0.1 M  $[nBu_4N][PF_6]$  supporting electrolyte MeCN solution with a 100 mV/s scan rate and 0.01 M of sample referenced to Fc (+0.380 V vs SCE). Scans were started at the open-circuit potential and scanned in the anode direction first; the second cycle is shown here.  $E_{1/2}$  values for  $(L4)NiBr_2$  are Ni(II)/Ni(I) = -0.71 V, Ni(I)/Ni(0) = -1.10 V. Literature reports CV of 2,9-substituted phen ligated Ni complexes are reported with  $E_{p/2}$  values of Ni(II)/Ni(I) = -0.69 V, Ni(I)/Ni(0) = -1.37 V vs SHE in THF.<sup>6</sup>

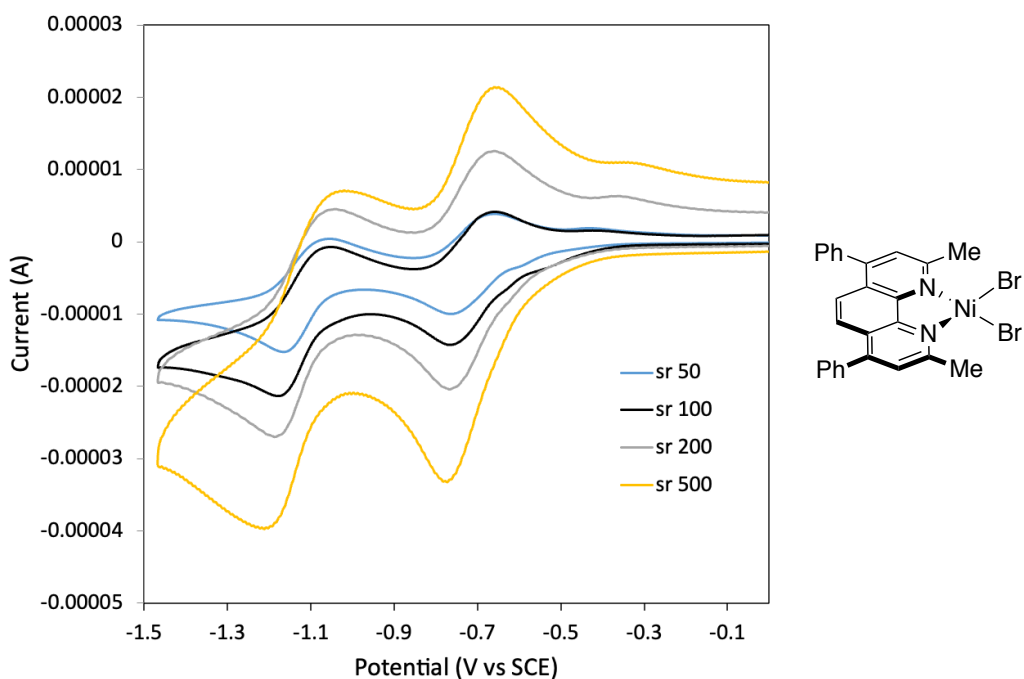

**Supplementary Figure 45.** Cyclic voltammogram of  $(L4)NiBr_2$ . Voltammograms were taken using a glassy carbon working electrode in a 0.1 M  $[nBu_4N][PF_6]$  supporting electrolyte MeCN solution with a varied scan rates and 0.01 M of sample referenced to Fc (+0.380 V vs SCE).

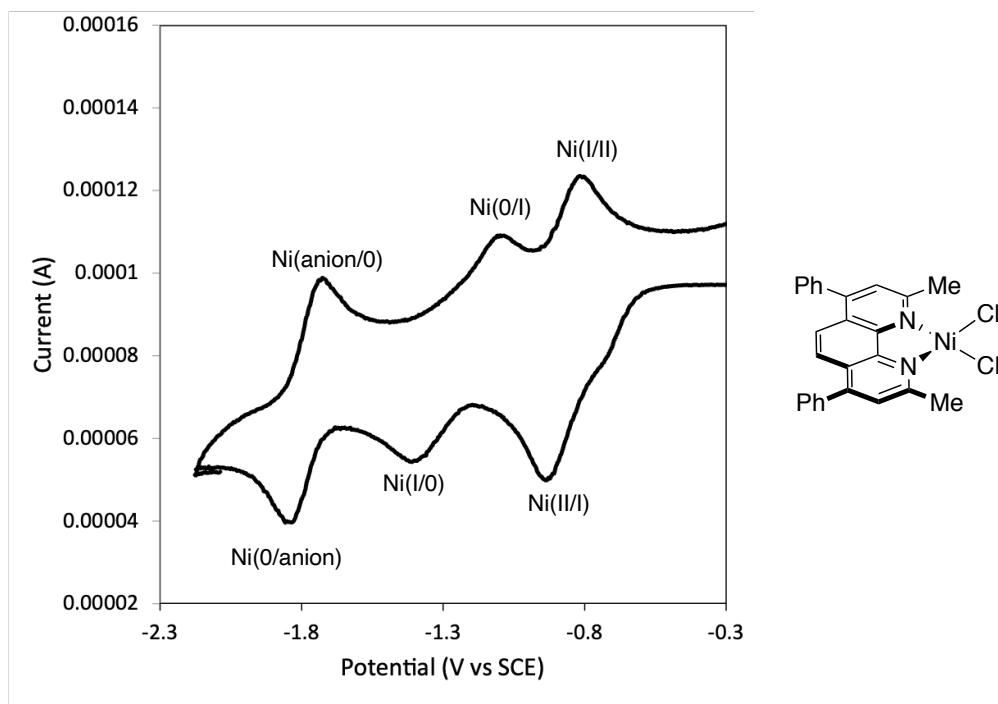

**Supplementary Figure 46.** Cyclic voltammogram of  $(\mathbf{L4})\text{NiCl}_2$ . Voltammograms were taken using a glassy carbon working electrode in a 0.1 M  $[\text{nBu}_4\text{N}][\text{PF}_6]$  supporting electrolyte MeCN solution with a 100 mV/s scan rate and 0.01 M of sample referenced to Fc (+0.380 V vs SCE). Scans were started at the open-circuit potential and scanned in the anode direction first; the second cycle is shown here.  $E_{1/2}$  values for  $(\mathbf{L4})\text{NiCl}_2$  are Ni(II)/Ni(I) = -0.86 V, Ni(I)/Ni(0) = -1.24 V. While the first reduction  $E_{1/2}$  ( $\text{Ni}^{\text{II/I}}$ ) appears reversible, the second reduction  $E_{1/2}$  ( $\text{Ni}^{\text{I/0}}$ ) appears quasireversible. Reduction of the ligand or to an anionic complex is observed in further reduction.

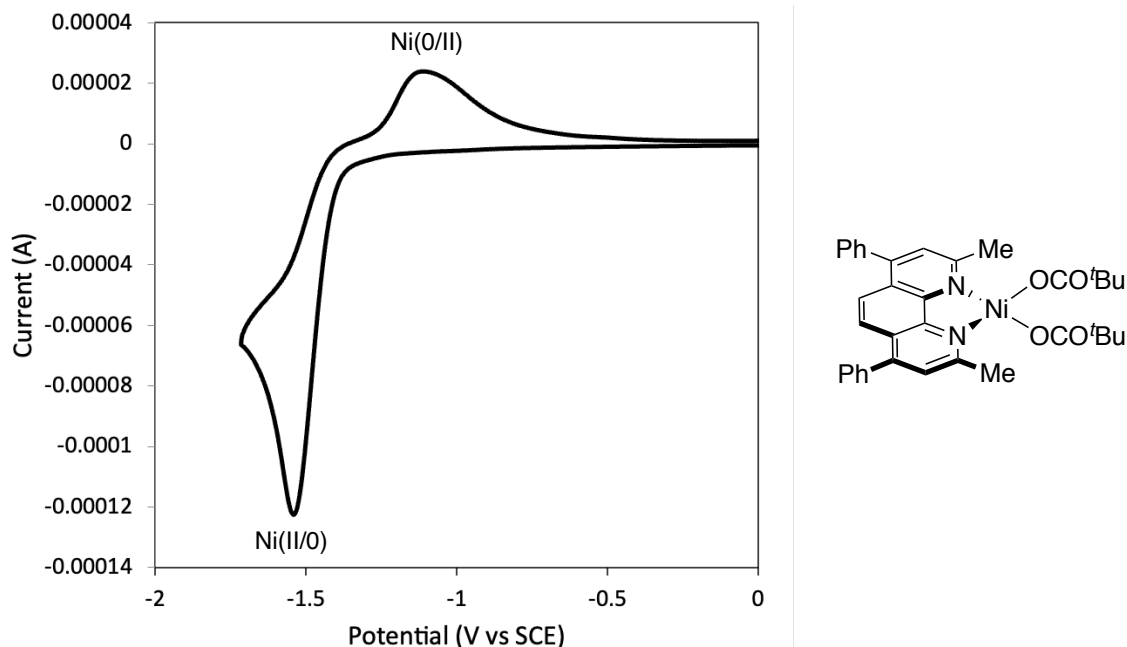

**Supplementary Figure 47.** Cyclic voltammogram of  $(\mathbf{L4})\text{Ni}(\text{OPiv})_2$ . Voltammograms were taken using a glassy carbon working electrode in a 0.1 M  $[\text{nBu}_4\text{N}][\text{PF}_6]$  supporting electrolyte MeCN solution with a 100 mV/s scan rate and 0.01 M of sample referenced to Fc (+0.380 V vs SCE). Scans were started at the open-circuit potential and scanned in the anode direction first; the second cycle is shown here.  $E_{p/2}$  value for  $(\mathbf{L4})\text{Ni}(\text{OPiv})_2$  are Ni(II)/Ni(0) = -1.43 V. The reduction appears chemically reversible ( $E_p$  oxidation = -1.27 V vs SCE) and electrochemically irreversible.



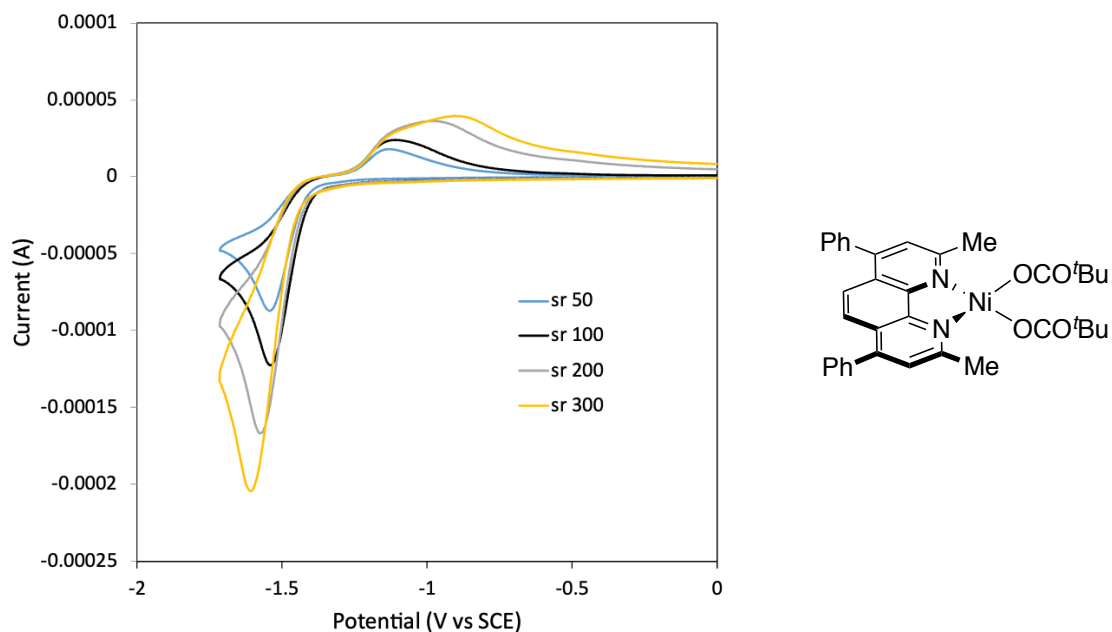

**Supplementary Figure 48.** Cyclic voltammogram of  $(L4)Ni(OPiv)_2$ . Voltammograms were taken using a glassy carbon working electrode in a 0.1 M  $[nBu_4N][PF_6]$  supporting electrolyte MeCN solution with various scan rates and 0.01 M of sample referenced to Fc (+0.380 V vs SCE).

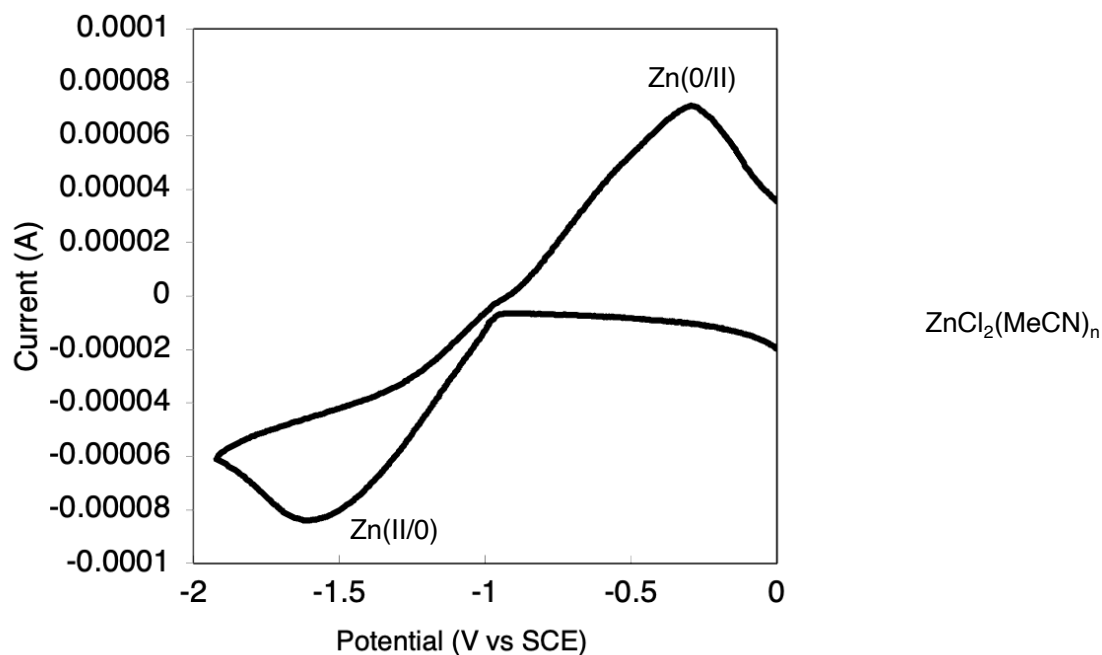

**Supplementary Figure 49.** Cyclic voltammogram of  $ZnCl_2$ . Voltammograms were taken using a glassy carbon working electrode in a 0.1 M  $[nBu_4N][PF_6]$  supporting electrolyte MeCN solution with a 100 mV/s scan rate and 0.01 M of sample referenced to Fc (+0.380 V vs SCE). Scans were started at the open-circuit potential and scanned in the anode direction first.  $E_{p/2}$  values for  $ZnCl_2$  are  $Zn(II)/Zn(0) = -1.26$  V vs SCE. The reduction appears chemically reversible ( $E_p$  oxidation = -0.26 V vs SCE), and electrochemically irreversible. Literature reports CV of  $ZnBr_2$  are reported with  $E_{p/2}$  values of  $Zn(II)/Zn(0) = -1.26$  V vs SHE, in DMA.<sup>6</sup>

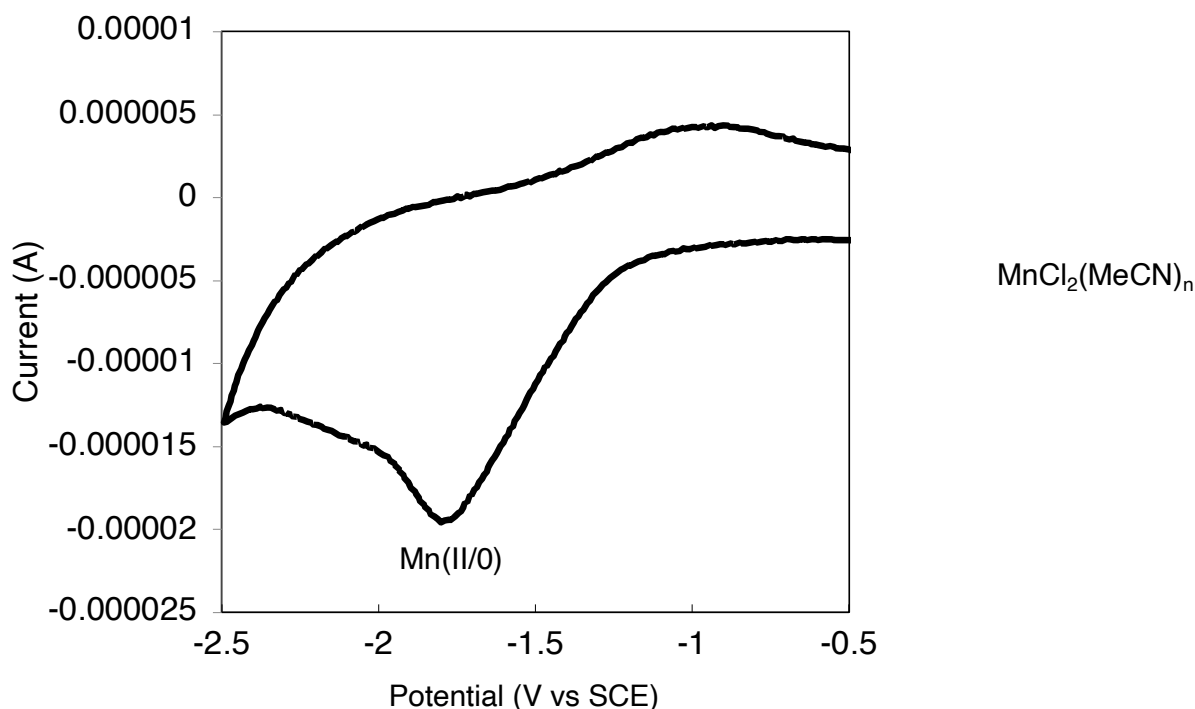

**Supplementary Figure 50.** Cyclic voltammogram of  $\text{MnCl}_2$ . Voltammograms were taken using a glassy carbon working electrode in a 0.1 M  $[\text{nBu}_4\text{N}][\text{PF}_6]$  supporting electrolyte MeCN solution with a 100 mV/s scan rate and 0.01 M of sample referenced to Fc (+0.380 V vs SCE). Scans were started at the open-circuit potential and scanned in the anode direction first.  $E_{p/2}$  values for  $\text{MnCl}_2$  are  $\text{Mn(II)/Mn(0)} = -1.38$  V. Unlike the case of  $\text{ZnCl}_2$ ,  $\text{MnCl}_2$  reduction appears chemically irreversible and electrochemically irreversible.

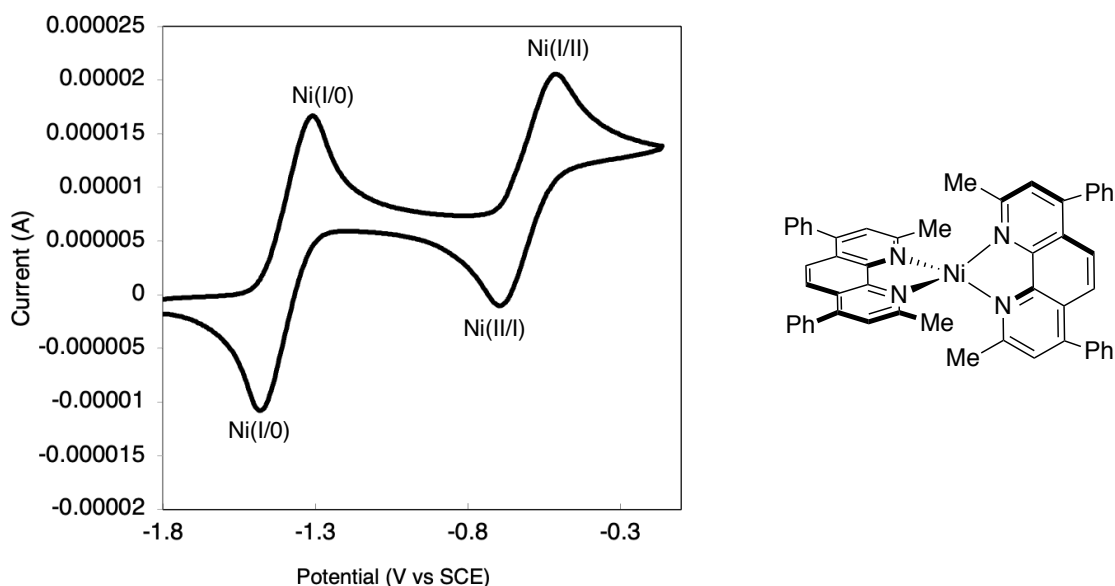

**Supplementary Figure 51.** Cyclic voltammogram of  $(\text{L4})_2\text{Ni}$ . Voltammograms were taken using a glassy carbon working electrode in a 0.1 M  $[\text{nBu}_4\text{N}][\text{PF}_6]$  supporting electrolyte THF solution with a 100 mV/s scan rate and 0.01 M of sample referenced to Fc (+0.380 V vs SCE). Scans were started at the open-circuit potential and scanned in the cathodic direction first; the second cycle is shown here.  $E_{1/2}$  values for  $(\text{L4})_2\text{Ni}$  are  $\text{Ni(II)/Ni(I)} = -0.59$  V,  $\text{Ni(I)/Ni(0)} = -1.39$  V. **Note:** This complex studied is poorly soluble in MeCN so CVs were performed in THF.

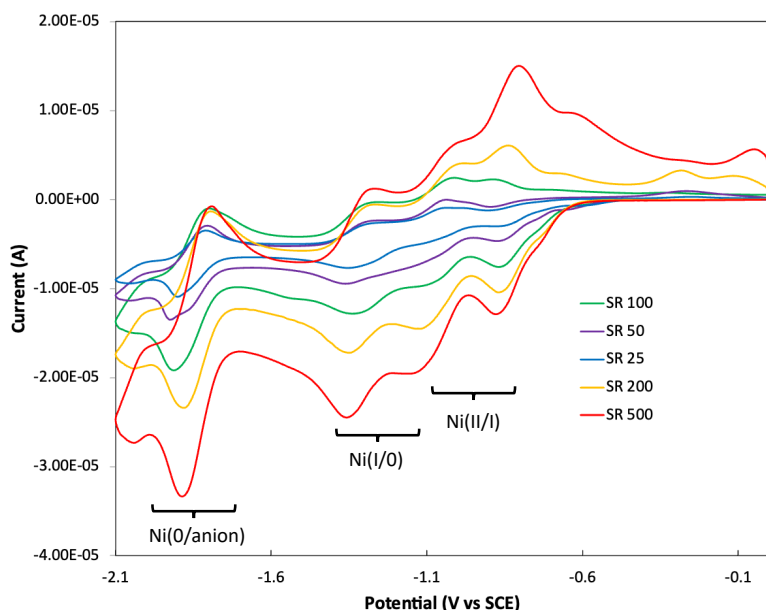

**Supplementary Figure 52.** Cyclic voltammogram of  $(\mathbf{L2})\text{NiBr}_2$ . Voltammograms were taken using a glassy carbon working electrode in a 0.1 M  $[\text{nBu}_4\text{N}][\text{BF}_4]$  supporting electrolyte MeCN solution with varied scan rates and 0.01 M of sample referenced to Fc (+0.380 V vs SCE). Scans were started at the open-circuit potential and scanned in the anode direction first; the first cycle is shown here. While the redox steps are less clear for  $(\mathbf{L2})\text{NiBr}_2$  due to the multiple species generated insitu (i.e solvates or higher order species/nickelates), estimates are given as;  $E_{1/2}$  values for Ni(II)/Ni(I) = -0.83 V, Ni(I)/Ni(0) = -1.30 V. Literature reports CV of  $(\text{bipy})_2\text{Ni}$  or  $(\text{bipy})_3\text{Ni}(\text{ClO}_4)_2$  MeCN (0.2 M, TEAP)<sup>7</sup> as two close redox steps from Ni(II/0) at -1.27 V and Ni(0/anion) at -1.97 V vs SCE or  $(\text{bipy})\text{NiCl}_2$  (MeCN, 0.1 M)<sup>8</sup> as two close redox steps from Ni(II/0) at -1.33 V and Ni(0/anion) at -2.09 V vs SCE.

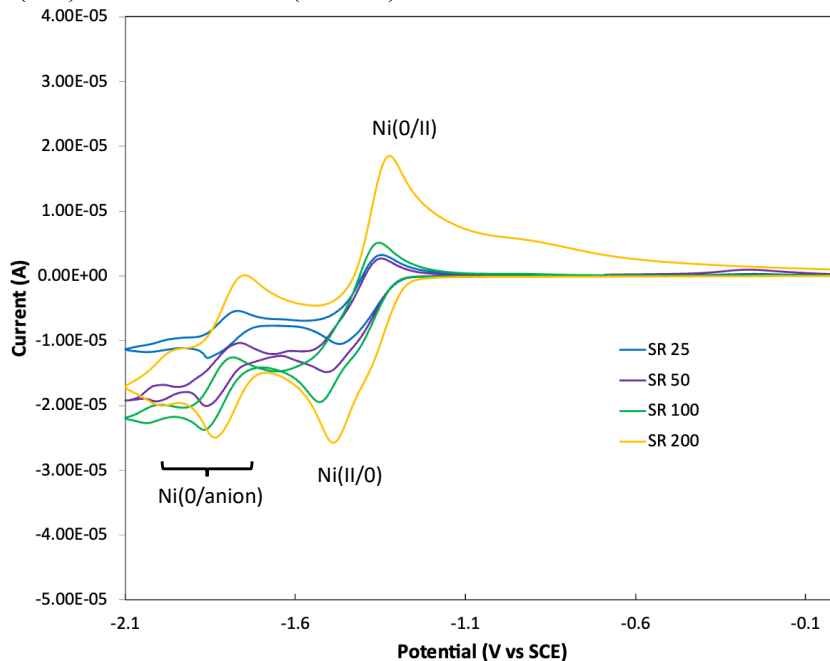

**Supplementary Figure 53.** Cyclic voltammogram of  $(\mathbf{L2})\text{Ni}(\text{OPiv})_2$ . Voltammograms were taken using a glassy carbon working electrode in a 0.1 M  $[\text{nBu}_4\text{N}][\text{BF}_4]$  supporting electrolyte MeCN solution with varied scan rates and 0.01 M of sample referenced to Fc (+0.380 V vs SCE). Scans were started at the open-circuit potential and scanned in the anode direction first; the first cycle is shown here.  $E_{1/2}$  values for  $(\mathbf{L2})\text{Ni}(\text{OPiv})_2$  are Ni(II)/Ni(0) = -1.48 V vs SCE.

## NMR and EPR Spectra of Synthesized Complexes

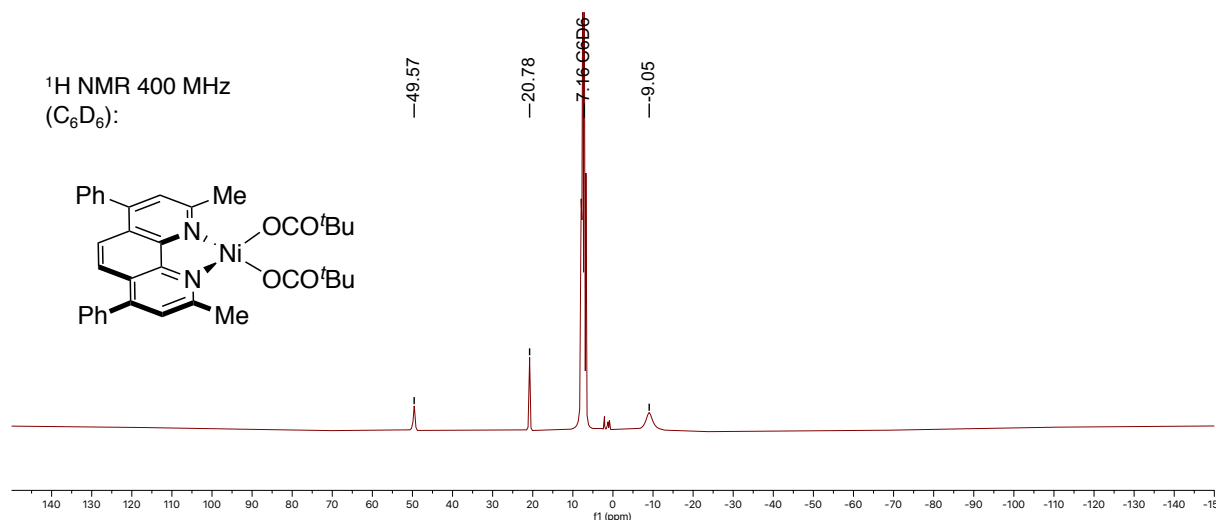

Supplementary Figure 54. NMR spectra (C<sub>6</sub>D<sub>6</sub>, 400 MHz) of (L4)Ni(OPiv)<sub>2</sub>.

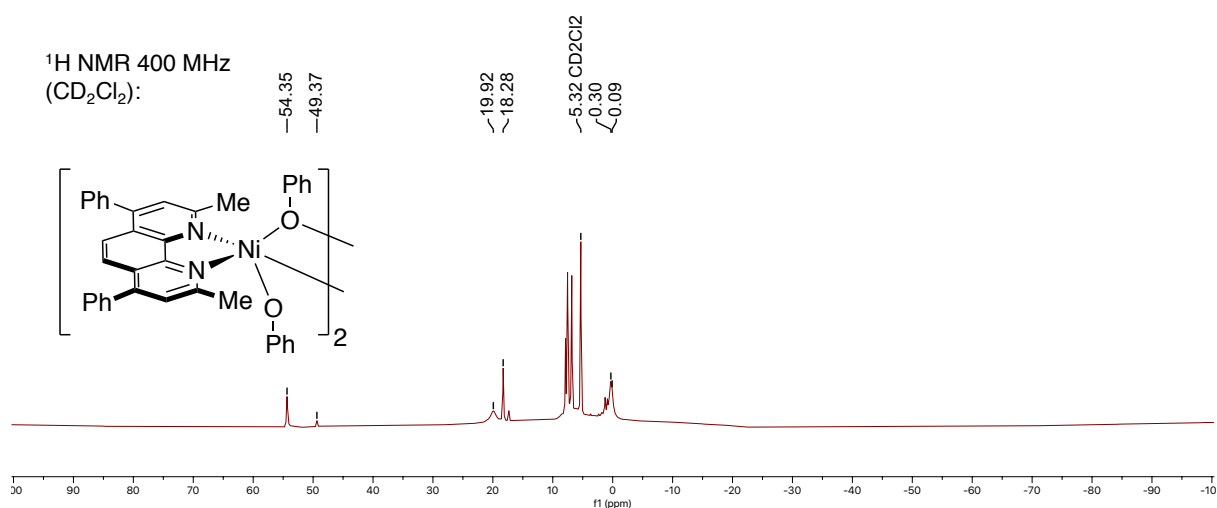

Supplementary Figure 55. NMR spectra (CD<sub>2</sub>Cl<sub>2</sub>, 400 MHz) of [(L4)Ni(OPh)<sub>2</sub>]<sub>2</sub>.

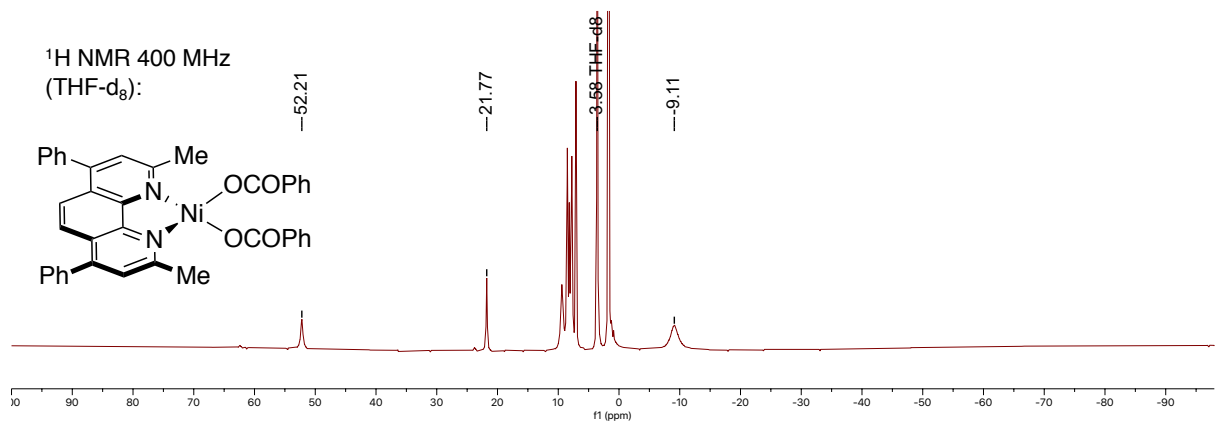

Supplementary Figure 56. NMR spectra (THF-*d*<sub>8</sub>, 400 MHz) of (L4)Ni(OCOPh)<sub>2</sub>.

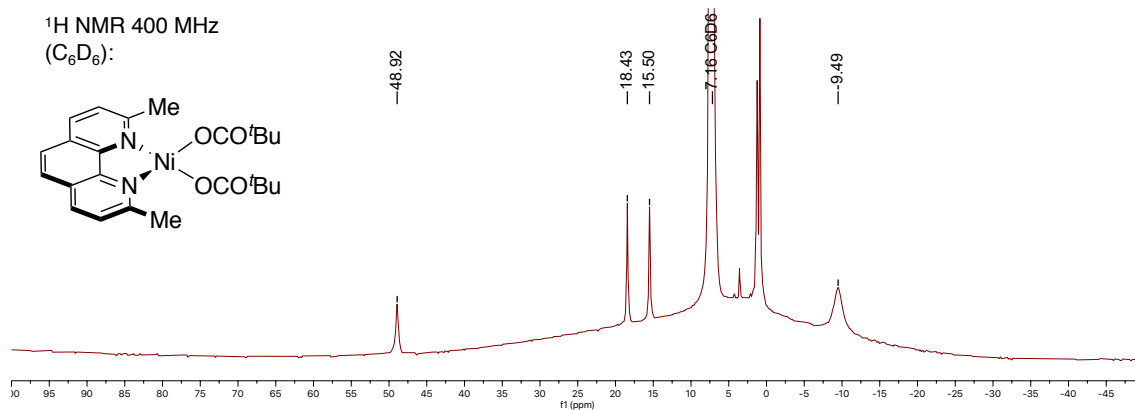

**Supplementary Figure 57.** NMR spectra (C<sub>6</sub>D<sub>6</sub>, 400 MHz) of (L3)Ni(OPiv)<sub>2</sub>

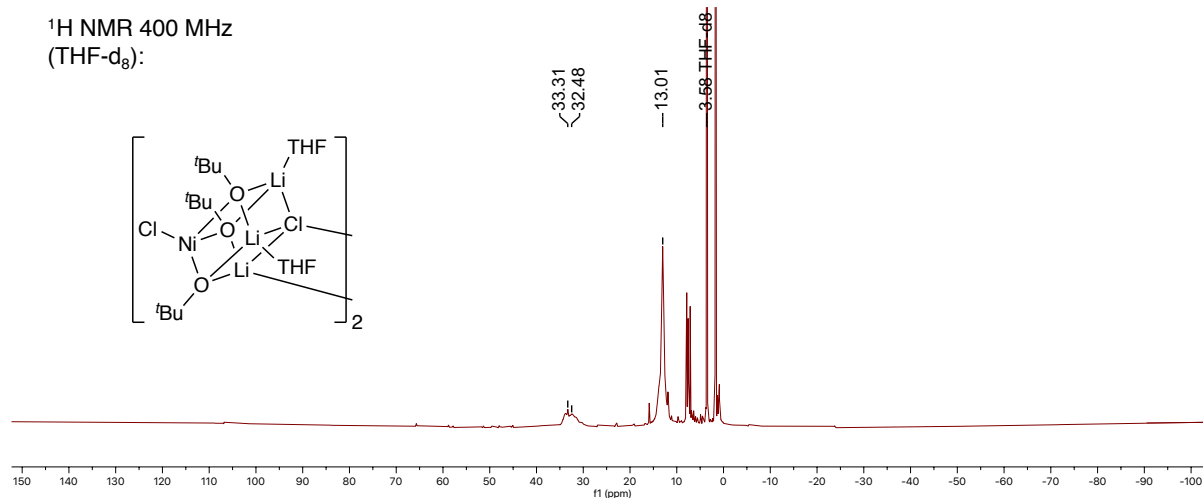

**Supplementary Figure 58.** NMR spectra (THF-d<sub>8</sub>, 400 MHz) of NiLi<sub>3</sub>Cl<sub>2</sub>(O<sup>t</sup>Bu)<sub>3</sub>·2THF.

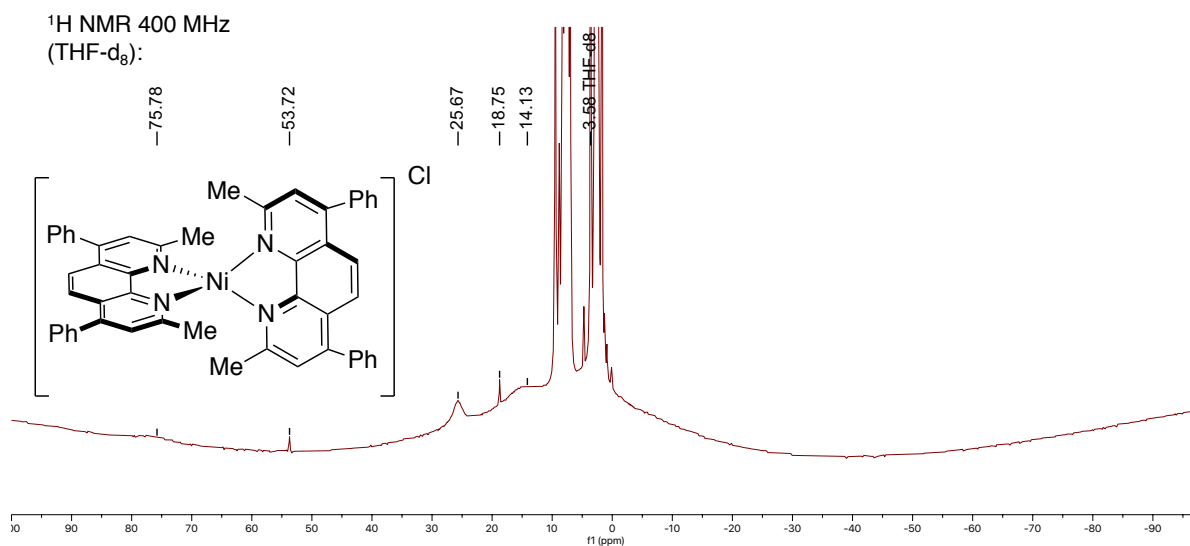

**Supplementary Figure 59.** NMR spectra (THF-d<sub>8</sub>, 400 MHz) of [(L4)<sub>2</sub>Ni]Cl.

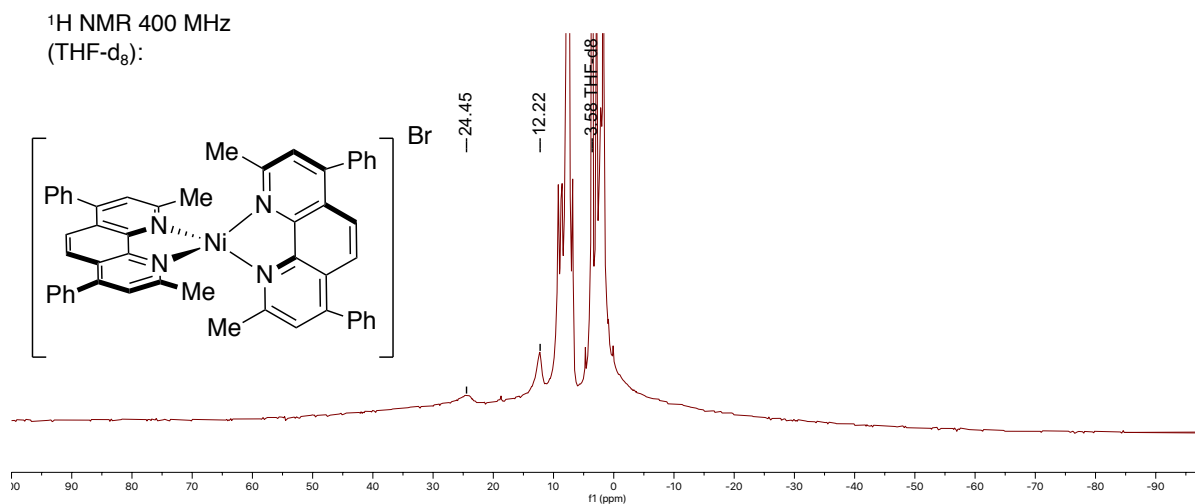

**Supplementary Figure 60.** NMR spectra (THF-d<sub>8</sub>, 400 MHz) of [(L4)<sub>2</sub>Ni]Br.

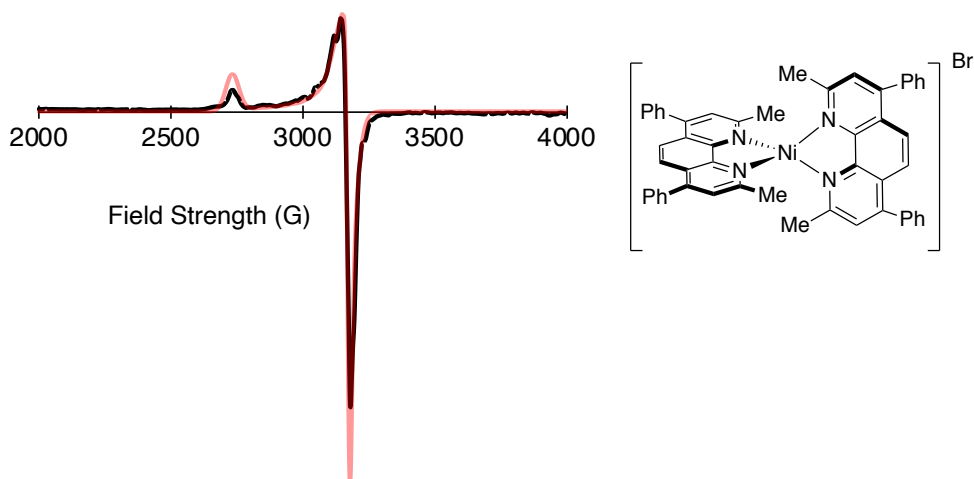

**Supplementary Figure 61.** Continuous wave (CW) X-Band EPR spectra of [(L4)<sub>2</sub>Ni]Br with g values fit to  $g(x) = 2.115$ ,  $g(y) = 2.114$ ,  $g(z) = 2.456$ .

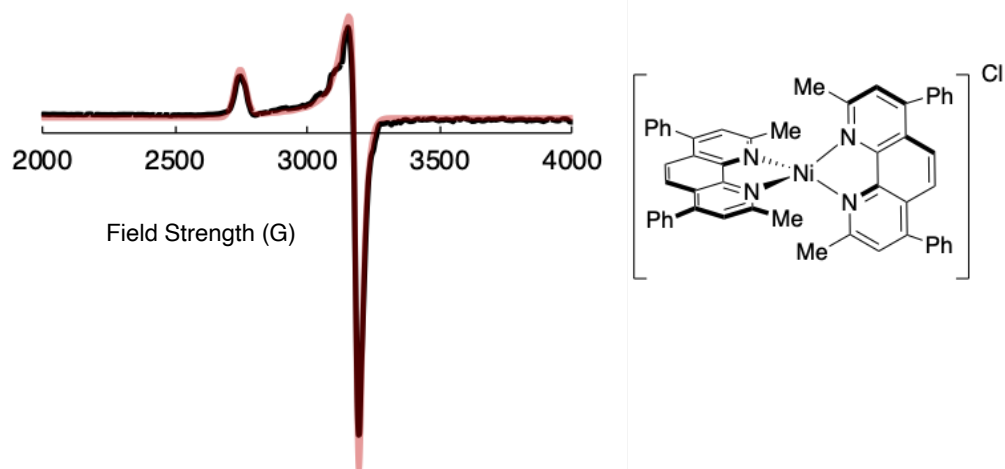

**Supplementary Figure 62.** Continuous wave (CW) X-Band EPR spectra of [(L4)<sub>2</sub>Ni]Cl with g values fit to  $g(x) = 2.109$ ,  $g(y) = 2.106$ ,  $g(z) = 2.445$ .

## Crystallographic Data

**Data collection:** The measured crystals were prepared under inert conditions immersed in perfluoropolyether as protecting oil for manipulation.

Crystal structure determination for **(L3)**Ni(OPiv)<sub>2</sub>, **(L4)**Ni(OPiv)<sub>2</sub>, [NiLi<sub>3</sub>Cl<sub>3</sub>(OBu)<sub>3</sub>•2THF]<sub>2</sub> and **(L4)**Ni(OCOPh)<sub>2</sub> was carried out using a Rigaku diffractometer equipped with a Pilatus 200K area detector, a Rigaku MicroMax-007HF microfocus rotating anode with MoK<sub>α</sub> radiation, Confocal Max Flux optics and an Oxford Cryosystems low temperature device Cryostream 700 plus (*T* = -173 °C). Full-sphere data collection was used with  $\omega$  and  $\varphi$  scans. *Programs used:* Data collection data reduction with CrysAlisPro<sup>9</sup> and absorption correction with Scale3 Abspack scaling algorithm.<sup>10</sup>

Crystal structure determination for [**(L4)**<sub>2</sub>Ni]Br, [**(L4)**Ni(OPh)<sub>2</sub>(THF)]<sub>2</sub> and **(L4)**NiBr<sub>2</sub> was carried out using an Apex DUO Kappa 4-axis goniometer equipped with an APPEX 2 4K CCD area detector, a Microfocus Source E025 IuS using CuK<sub>α</sub> radiation, Quazar MX multilayer Optics as monochromator and an Oxford Cryosystems low temperature device Cryostream 700 plus (*T* = -173 °C). Full-sphere data collection was used with  $\omega$  and  $\varphi$  scans. *Programs used:* Data collection APEX II,<sup>11</sup> data reduction Bruker Saint<sup>12</sup> V/.60A and absorption correction TWINABS.<sup>13-14</sup>

**Structure Solution and Refinement:** Crystal structure solution was achieved using the computer program SHELXT.<sup>15</sup> Visualization was performed with the program SHELXL.<sup>16</sup> Missing atoms were subsequently located from difference Fourier synthesis and added to the atom list. Least-squares refinement on *F*<sup>2</sup> using all measured intensities was carried out using the program SHELXL 2015.<sup>17</sup> All non-hydrogen atoms were refined including anisotropic displacement parameters.

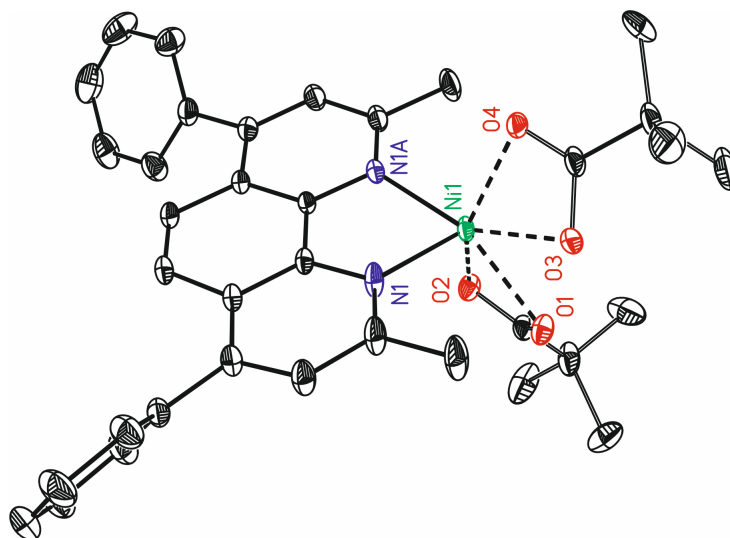

**Supplementary Figure 63.** ORTEP drawing (50 %) showing (L4)Ni(OPiv)<sub>2</sub>. Hydrogen atoms and disordered parts have been omitted in the sake of clarity. CCDC deposition number **CCDC-2175355**.

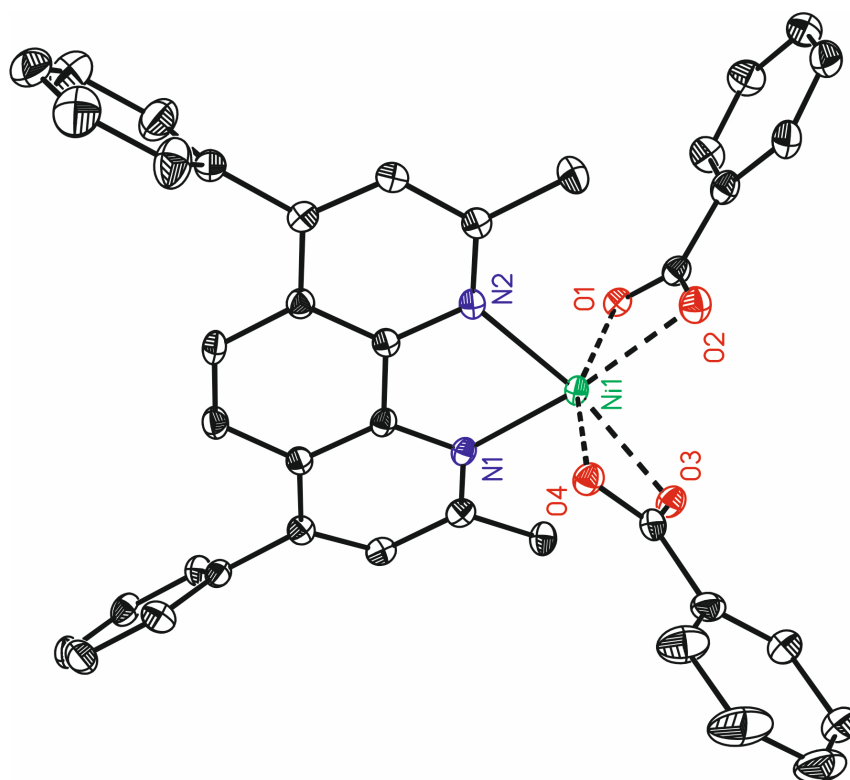

**Supplementary Figure 64.** ORTEP drawing (50 %) showing (L4)Ni(OCOPh)<sub>2</sub>. Hydrogen atoms and disordered THF solvent molecule have been omitted in the sake of clarity. CCDC deposition number **CCDC-2175356**.



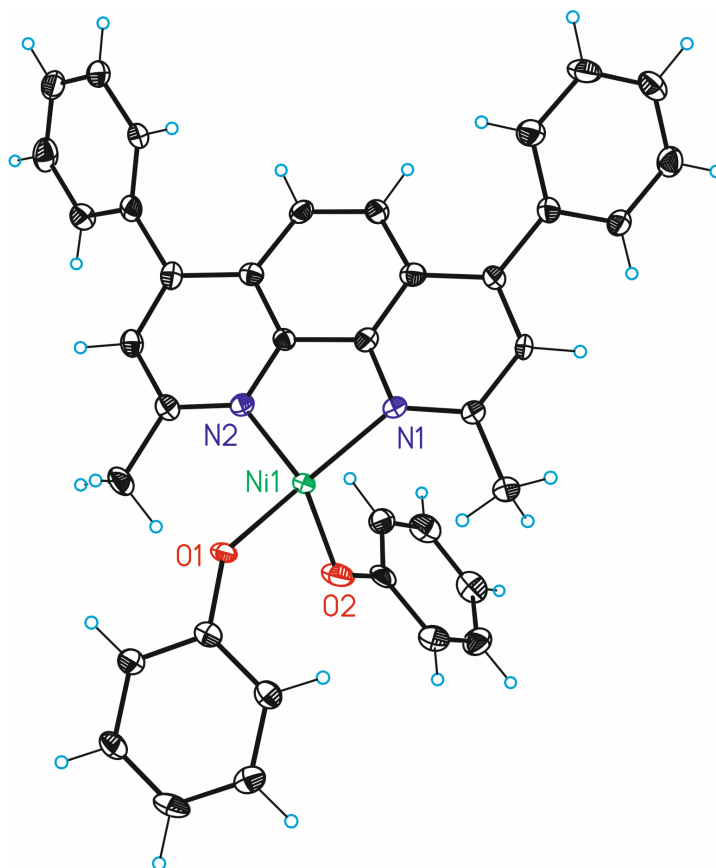

**Supplementary Figure 65.** ORTEP drawing (50 %) showing asymmetric unit of  $[(\mathbf{L4})\text{Ni}(\text{OPh})_2(\text{THF})_2]$ . Disordered THF solvent molecules have been omitted in the sake of clarity. CCDC deposition number **CCDC-2175354**.

 BR1

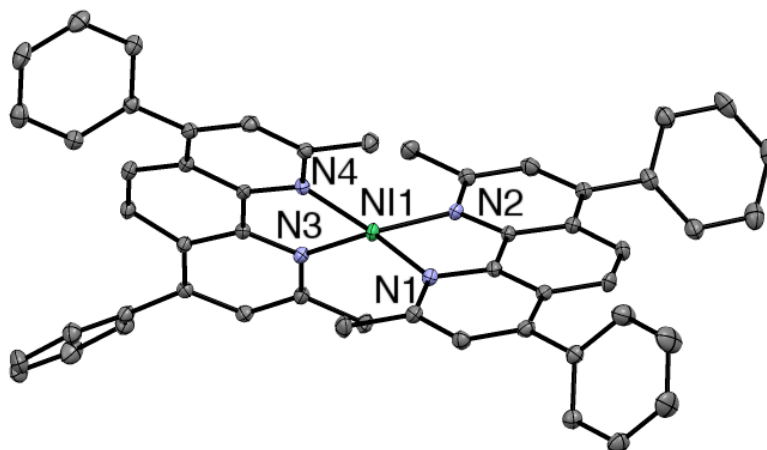

**Supplementary Figure 66.** ORTEP drawing (50 %) showing  $[(\mathbf{L4})_2\text{Ni}]\text{Br}$ . Hydrogen atoms and  $\text{CH}_3\text{CN}$  solvent molecules have been omitted in the sake of clarity. CCDC deposition number **CCDC-2175353**.

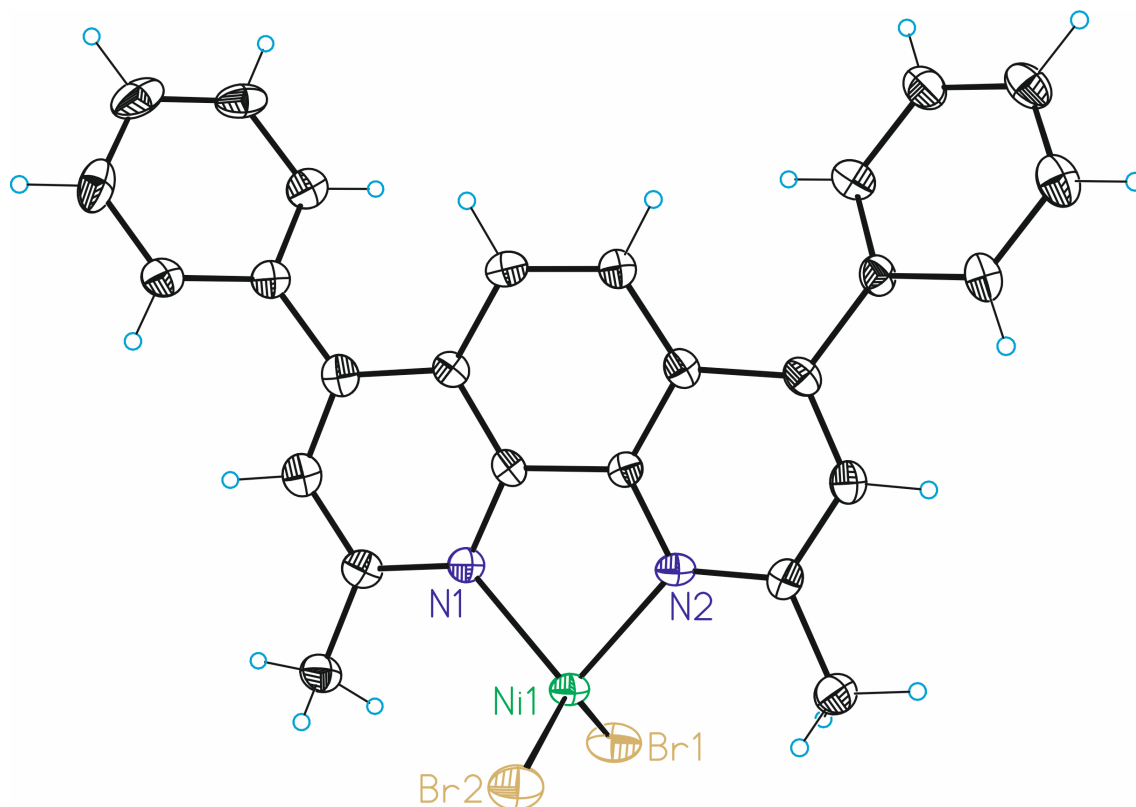

**Supplementary Figure 67.** ORTEP drawing (50 %) showing (L4)NiBr<sub>2</sub>. CCDC deposition number CCDC-2175357.

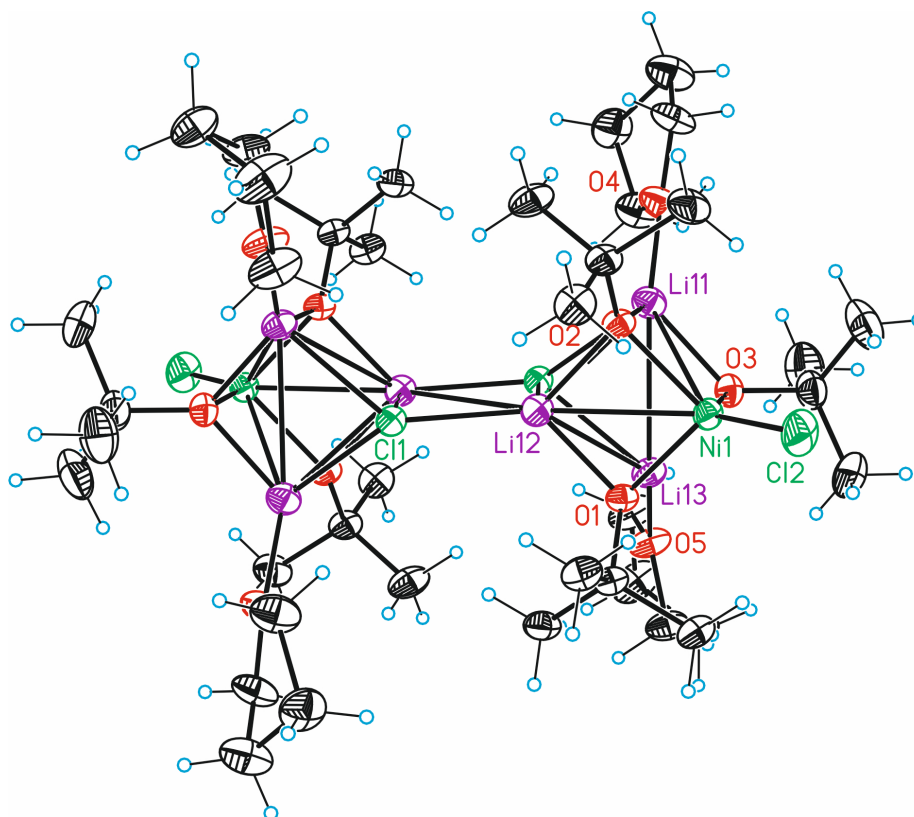

**Supplementary Figure 68.** ORTEP drawing (50 %) showing [NiLi<sub>3</sub>Cl<sub>2</sub>(O'Bu)<sub>3</sub>•2THF]<sub>2</sub>. Disordered parts have been omitted in the sake of clarity. CCDC deposition number CCDC-2175358.

Go to: [\[table of contents\]](#) [\[references\]](#)

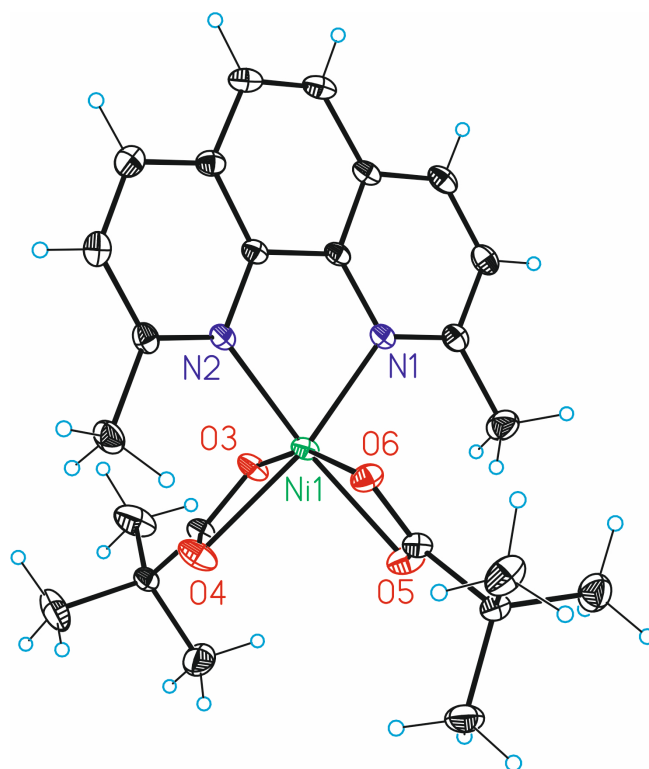

**Supplementary Figure 69.** ORTEP drawing (50 %) showing  $(L3)Ni(OPiv)_2$ . CCDC deposition number **CCDC-2175352**.

Supplementary Table 1. Crystallographic Data

|                                              | (L4)Ni(OPiv) <sub>2</sub>                                       | (L4)Ni(OCOPh) <sub>2</sub><br>•0.5THF                             | [(L4)Ni(OPh) <sub>2</sub> •<br>THF] <sub>2</sub>                              |
|----------------------------------------------|-----------------------------------------------------------------|-------------------------------------------------------------------|-------------------------------------------------------------------------------|
| <b>Formula</b>                               | C <sub>36</sub> H <sub>38</sub> N <sub>2</sub> NiO <sub>4</sub> | C <sub>44</sub> H <sub>38</sub> N <sub>2</sub> NiO <sub>4.5</sub> | C <sub>84</sub> H <sub>76</sub> N <sub>4</sub> Ni <sub>2</sub> O <sub>6</sub> |
| <b>Formula weight</b>                        | 621.39                                                          | 697.42                                                            | 1354.87                                                                       |
| <b>T (K)</b>                                 | 100(2)                                                          | 100(2)                                                            | 100(2)                                                                        |
| <b>Wavelength (Å)</b>                        | 0.71073                                                         | 0.71073                                                           | 0.71073                                                                       |
| <b>Crystal system</b>                        | Orthorhombic                                                    | Monoclinic                                                        | Triclinic                                                                     |
| <b>Space group</b>                           | <i>Pnma</i>                                                     | <i>C2/c</i>                                                       | <i>P-1</i>                                                                    |
| <b>a (Å)</b>                                 | 8.6390(3)                                                       | 44.5471(15)                                                       | 9.4680(15)                                                                    |
| <b>b (Å)</b>                                 | 17.4573(10)                                                     | 11.9193(5)                                                        | 12.252(2)                                                                     |
| <b>c (Å)</b>                                 | 20.8047(5)                                                      | 12.5427(4)                                                        | 14.803(3)                                                                     |
| <b>α (deg)</b>                               | 90                                                              | 90                                                                | 100.401(5)                                                                    |
| <b>β (deg)</b>                               | 90                                                              | 96.780(3)                                                         | 97.331(5)                                                                     |
| <b>γ (deg)</b>                               | 90                                                              | 90                                                                | 96.907(5)                                                                     |
| <b>V (Å<sup>3</sup>)</b>                     | 3137.6(2)                                                       | 6613.2(4)                                                         | 1657.0(5)                                                                     |
| <b>Z</b>                                     | 4                                                               | 8                                                                 | 1                                                                             |
| <b>Density (calc.) (Mg/m<sup>3</sup>)</b>    | 1.315                                                           | 1.401                                                             | 1.358                                                                         |
| <b>μ (mm<sup>-1</sup>)</b>                   | 0.660                                                           | 0.636                                                             | 0.629                                                                         |
| <b>F(000)</b>                                | 1312                                                            | 2912                                                              | 712                                                                           |
| <b>Crystal size (mm<sup>3</sup>)</b>         | 0.040 x 0.040 x<br>0.020                                        | 0.090 x 0.060 x<br>0.010                                          | 0.050 x 0.030 x<br>0.010                                                      |
| <b>Theta range for data collection (deg)</b> | 2.553 to 37.284                                                 | 2.446 to 28.951                                                   | 1.708 to 27.896                                                               |
| <b>Index ranges</b>                          | -13 ≤ h ≤ 14,<br>-22 ≤ k ≤ 15,<br>-35 ≤ l ≤ 19                  | -47 ≤ h ≤ 59,<br>-12 ≤ k ≤ 16,<br>-15 ≤ l ≤ 14                    | -11 ≤ h ≤ 12,<br>-16 ≤ k ≤ 16,<br>-19 ≤ l ≤ 19                                |
| <b>Reflections collected</b>                 | 22056                                                           | 28776                                                             | 16033                                                                         |
| <b>Independent reflections</b>               | 7206<br>[R(int) = 0.0375]                                       | 7433[R(int) =<br>0.0357]                                          | 7626[R(int) =<br>0.0715]                                                      |
| <b>Completeness to theta</b>                 | 86.3%<br>37.284°                                                | 85.0%<br>28.951 °                                                 | 96.2 %<br>27.896 °                                                            |
| <b>Absorption correction</b>                 | Multi-scan                                                      | Multi-scan                                                        | Multi-scan                                                                    |
| <b>Max. and min. transmission</b>            | 1.00 and 0.85                                                   | 1.00 and 0.46                                                     | 0.74 and 0.65                                                                 |
| <b>Refinement method</b>                     | Full-matrix least-squares on F <sup>2</sup>                     | Full-matrix least-squares on F <sup>2</sup>                       | Full-matrix least-squares on F <sup>2</sup>                                   |
| <b>Data / restraints / parameters</b>        | 7206/ 0/ 257                                                    | 7433/ 194/ 494                                                    | 7626/ 220/ 481                                                                |
| <b>Goodness-of-fit on F<sup>2</sup></b>      | 1.017                                                           | 1.026                                                             | 1.031                                                                         |
| <b>Final R indices [I &gt; 2σ(I)]</b>        | R1 = 0.0397,<br>wR2 = 0.0901                                    | R1 = 0.0450,<br>wR2 = 0.1049                                      | R1 = 0.0666,<br>wR2 = 0.1330                                                  |
| <b>R indices (all data)</b>                  | R1 = 0.0698,<br>wR2 = 0.0993                                    | R1 = 0.0762,<br>wR2 = 0.1162                                      | R1 = 0.1242,<br>wR2 = 0.1557                                                  |
| <b>Largest diff. peak and hole</b>           | 0.475 and<br>-0.468 e.Å <sup>-3</sup>                           | 1.038 and<br>-0.659 e.Å <sup>-3</sup>                             | 0.703 and<br>-0.692 e.Å <sup>-3</sup>                                         |

Supplementary Table 2. Crystallographic Data

|                                              |                                                                     |                                                                    |                                                                                                 |
|----------------------------------------------|---------------------------------------------------------------------|--------------------------------------------------------------------|-------------------------------------------------------------------------------------------------|
|                                              | <b>[(L4)<sub>2</sub>Ni]Br•3MeCN</b>                                 | <b>(L4)NiBr<sub>2</sub></b>                                        | <b>[NiLi<sub>3</sub>Cl<sub>2</sub>(O<sup>t</sup>Bu)<sub>3</sub>•2THF]<sub>2</sub></b>           |
| <b>Formula</b>                               | C <sub>58</sub> H <sub>49</sub> BrN <sub>7</sub> Ni                 | C <sub>26</sub> H <sub>20</sub> Br <sub>2</sub> N <sub>2</sub> Ni  | C <sub>40</sub> H <sub>86</sub> Cl <sub>4</sub> Li <sub>6</sub> Ni <sub>2</sub> O <sub>10</sub> |
| <b>Formula weight</b>                        | 982.66                                                              | 578.97                                                             | 1027.94                                                                                         |
| <b>T (K)</b>                                 | 100(2)                                                              | 100(2)                                                             | 100(2)                                                                                          |
| <b>Wavelength (Å)</b>                        | 0.71073                                                             | 0.71073                                                            | 0.71073                                                                                         |
| <b>Crystal system</b>                        | Monoclinic                                                          | Monoclinic                                                         | Triclinic                                                                                       |
| <b>Space group</b>                           | <i>C2/c</i>                                                         | <i>P2<sub>1</sub>/c</i>                                            | <i>P-1</i>                                                                                      |
| <b><i>a</i> (Å)</b>                          | 32.275(3)                                                           | 12.861(5)                                                          | 9.9981(3)                                                                                       |
| <b><i>b</i> (Å)</b>                          | 11.1373(11)                                                         | 22.587(8)                                                          | 11.4148(4)                                                                                      |
| <b><i>c</i> (Å)</b>                          | 27.385(3)                                                           | 7.834(3)                                                           | 13.5283(3)                                                                                      |
| <b><math>\alpha</math> (deg)</b>             | 90                                                                  | 90                                                                 | 103.805(2)                                                                                      |
| <b><math>\beta</math> (deg)</b>              | 101.187(2)                                                          | 98.804(11)                                                         | 103.504(2)                                                                                      |
| <b><math>\gamma</math> (deg)</b>             | 90                                                                  | 90                                                                 | 102.091(2)                                                                                      |
| <b><i>V</i> (Å<sup>3</sup>)</b>              | 9656.8(16)                                                          | 2249.0(14)                                                         | 1399.21(7)                                                                                      |
| <b><i>Z</i></b>                              | 8                                                                   | 4                                                                  | 1                                                                                               |
| <b>Density (calc.) (Mg/m<sup>3</sup>)</b>    | 1.352                                                               | 1.710                                                              | 1.220                                                                                           |
| <b><math>\mu</math> (mm<sup>-1</sup>)</b>    | 1.276                                                               | 4.432                                                              | 0.908                                                                                           |
| <b>F(000)</b>                                | 4072                                                                | 1152                                                               | 548                                                                                             |
| <b>Crystal size (mm<sup>3</sup>)</b>         | 0.500 x 0.030 x 0.020                                               | 0.200 x 0.100 x 0.010                                              | 0.080 x 0.060 x 0.050                                                                           |
| <b>Theta range for data collection (deg)</b> | 1.516 to 31.357                                                     | 1.602 to 29.346                                                    | 2.299 to 31.958                                                                                 |
| <b>Index ranges</b>                          | -42 ≤ <i>h</i> ≤ 43,<br>-16 ≤ <i>k</i> ≤ 16,<br>-39 ≤ <i>l</i> ≤ 40 | -17 ≤ <i>h</i> ≤ 14,<br>-28 ≤ <i>k</i> ≤ 31,<br>-10 ≤ <i>l</i> ≤ 9 | -14 ≤ <i>h</i> ≤ 14,<br>-16 ≤ <i>k</i> ≤ 16,<br>-20 ≤ <i>l</i> ≤ 19                             |
| <b>Reflections collected</b>                 | 38133                                                               | 23083                                                              | 22057                                                                                           |
| <b>Independent reflections</b>               | 15247<br>[R(int) = 0.0431]                                          | 5709<br>[R(int) = 0.0814]                                          | 9056<br>[R(int) = 0.0452]                                                                       |
| <b>Completeness to theta</b>                 | 96.1%<br>31.357°                                                    | 92.4 %<br>29.346 °                                                 | 93.7 %<br>31.958 °                                                                              |
| <b>Absorption correction</b>                 | Multi-scan                                                          | Multi-scan                                                         | Multi-scan                                                                                      |
| <b>Max. and min. transmission</b>            | 0.74 and 0.66                                                       | 0.74 and 0.52                                                      | 1.00 and 0.44                                                                                   |
| <b>Refinement method</b>                     | Full-matrix least-squares on F <sup>2</sup>                         | Full-matrix least-squares on F <sup>2</sup>                        | Full-matrix least-squares on F <sup>2</sup>                                                     |
| <b>Data / restraints / parameters</b>        | 15247/ 0/ 611                                                       | 5709/ 0/ 282                                                       | 9056/ 480/ 381                                                                                  |
| <b>Goodness-of-fit on F<sup>2</sup></b>      | 1.020                                                               | 1.031                                                              | 1.027                                                                                           |
| <b>Final R indices [I &gt; 2σ(I)]</b>        | R1 = 0.0443,<br>wR2 = 0.0918                                        | R1 = 0.0555,<br>wR2 = 0.1488                                       | R1 = 0.0529,<br>wR2 = 0.1353                                                                    |
| <b>R indices (all data)</b>                  | R1 = 0.0735,<br>wR2 = 0.1008                                        | R1 = 0.0944,<br>wR2 = 0.1723                                       | R1 = 0.0692,<br>wR2 = 0.1440                                                                    |
| <b>Largest diff. peak and hole</b>           | 0.552 and<br>-0.442 e.Å <sup>-3</sup>                               | 1.285 and<br>-1.305 e.Å <sup>-3</sup>                              | 1.640 and<br>-1.049 e.Å <sup>-3</sup>                                                           |

Supplementary Table 3. Crystallographic Data

|                                              |                                                                     |
|----------------------------------------------|---------------------------------------------------------------------|
|                                              | (L3)Ni(OPiv) <sub>2</sub>                                           |
| <b>Formula</b>                               | C <sub>24</sub> H <sub>30</sub> N <sub>2</sub> NiO <sub>4</sub>     |
| <b>Formula weight</b>                        | 469.21                                                              |
| <b>T (K)</b>                                 | 100(2)                                                              |
| <b>Wavelength (Å)</b>                        | 0.71073                                                             |
| <b>Crystal system</b>                        | Triclinic                                                           |
| <b>Space group</b>                           | <i>P</i> -1                                                         |
| <b><i>a</i> (Å)</b>                          | 9.4391(3)                                                           |
| <b><i>b</i> (Å)</b>                          | 9.6315(2)                                                           |
| <b><i>c</i> (Å)</b>                          | 14.0382(3)                                                          |
| <b><math>\alpha</math> (deg)</b>             | 88.863(2)                                                           |
| <b><math>\beta</math> (deg)</b>              | 82.422(2)                                                           |
| <b><math>\gamma</math> (deg)</b>             | 62.883(2)                                                           |
| <b>V (Å<sup>3</sup>)</b>                     | 1124.87(5)                                                          |
| <b>Z</b>                                     | 2                                                                   |
| <b>Density (calc.) (Mg/m<sup>3</sup>)</b>    | 1.385                                                               |
| <b><math>\mu</math> (mm<sup>-1</sup>)</b>    | 0.895                                                               |
| <b>F(000)</b>                                | 496                                                                 |
| <b>Crystal size (mm<sup>3</sup>)</b>         | 0.080 x 0.050 x 0.040                                               |
| <b>Theta range for data collection (deg)</b> | 2.378 to 33.032                                                     |
| <b>Index ranges</b>                          | -14 ≤ <i>h</i> ≤ 14,<br>-14 ≤ <i>k</i> ≤ 13,<br>-21 ≤ <i>l</i> ≤ 21 |
| <b>Reflections collected</b>                 | 22403                                                               |
| <b>Independent reflections</b>               | 7703<br>[R(int) = 0.0173]                                           |
| <b>Completeness to theta</b>                 | 90.4 %<br>33.032°                                                   |
| <b>Absorption correction</b>                 | Multi-scan                                                          |
| <b>Max. and min. transmission</b>            | 1.00 and 0.87                                                       |
| <b>Refinement method</b>                     | Full-matrix least-squares<br>on F <sup>2</sup>                      |
| <b>Data / restraints / parameters</b>        | 7703/ 0/ 288                                                        |
| <b>Goodness-of-fit on F<sup>2</sup></b>      | 1.044                                                               |
| <b>Final R indices<br/>[I &gt; 2σ(I)]</b>    | R1 = 0.0253,<br>wR2 = 0.0699                                        |
| <b>R indices (all data)</b>                  | R1 = 0.0284,<br>wR2 = 0.0713                                        |
| <b>Largest diff. peak and hole</b>           | 0.528 and<br>-0.360 e.Å <sup>-3</sup>                               |

## Computational details

All geometry optimizations of intermediates and transition states were achieved using spin-unrestricted (U)B3LYP<sup>18-19</sup>-D3<sup>20-23</sup>/def2-SVP<sup>24-25</sup> method, in THF solvent using the CPCM solvent model<sup>26-30</sup> with “opt=noeigen” and “guess=mix” keywords as implemented in Gaussian16.<sup>31</sup> Vibrational frequencies were computed at the same level to get thermal corrections (at 298 K; enthalpy and free energy) and to characterize the obtained stationary points as transition states (one and only one imaginary frequency) or minima (zero imaginary frequencies). Different spins were considered for the nickel species. Also, extensive conformational search was performed for all intermediates and transition states, and only the lowest-energy species were shown and discussed. Intrinsic reaction coordinate (IRC) calculations were performed for all transition states to ensure they are connected to the corresponding intermediates. To compare energetics, we also carried out single-point energy calculations for the lowest energy structures using (U)B3LYP-D3/def2-TZVPP-CPCM(THF); (U)PBE0-D3/def2-TZVPP-CPCM(THF) and domain based local pair natural orbital coupled cluster method with single-, double-, and perturbative triple excitations and def2-SVP basis set along with def2-SVP/C<sup>32</sup> as auxiliary basis set [noted as DLPNO-CCSD(T)/def2-SVP-CPCM(THF)/(U)B3LYP-D3/def2-SVP-CPCM(THF)] with ORCA (version 4.1.1).<sup>33</sup> All structural figures were generated with CYLview.<sup>34</sup> Distances in structural figures are shown in Å and energies are in kcal/mol.

### Broken-Symmetry approach for optimization Ni(0) species

Our initial DFT calculations on (L4)<sub>2</sub>Ni<sup>0</sup> indicated a triplet ground state in stark contrast to the experimental observation wherein Ni<sup>0</sup> species is diamagnetic in nature. To resolve this dilemma and to ascertain that the optimized geometries are indeed the lowest energy structures, the wavefunction stability associated with each structure were further examined. This resulted in an interesting observation that the DFT optimized Ni<sup>0</sup> singlet species has an unstable wavefunction, thus increasing its energy significantly. However, the wavefunction associated with Ni<sup>0</sup> triplet species is stable, thus triplet species ends up having lower energy and in turn may lead to a false interpretation of triplet state being the Ni<sup>0</sup> ground state. Therefore, all the optimized structures throughout this project were examined for its wavefunction stability using *stable=opt* keyword to ascertain the true energetics. To understand, the underlying reason for this inability of DFT to capture the true ground state of Ni-complexes, an extensive literature search on N-ligated Ni complexes were also carried out which in turn revealed that Ni complexes containing bipyridine ligands are best described as Ni<sup>I</sup>(bpy)(bpy<sup>0</sup>) wherein the central Ni<sup>I</sup> ion (d<sup>9</sup>) is antiferromagnetically coupled to the charge-delocalized  $\pi$ -radical anion (bpy<sup>-1</sup>).<sup>35</sup> Therefore, defining 0 as charge and 1 as the multiplicity is not exactly true for these type of N-ligated Ni complexes. To capture the antiferromagnetic coupling between the Ni center and the associated ligands, Broken Symmetry DFT calculations must be used. So, we also optimized the Ni<sup>0</sup> species using BS-DFT calculations, and it was observed that the BS-DFT solution converges to the *stable=opt* solution as shown in **Supplementary Figure 70**. The energy obtained for using *stable=opt* keyword is lowest and thus highlighted in yellow.

| Method Used                                    | Spin state | Wavefunction stable ? | E            |
|------------------------------------------------|------------|-----------------------|--------------|
| UKS                                            | 1          | No                    | -3731.496636 |
| UKS                                            | 3          | Yes                   | -3731.508782 |
| UKS with stable=opt                            | 1          | Yes                   | -3731.516634 |
| BS(1,-1)<br>(converges to stable=opt solution) | 1          | Yes                   | -3731.516615 |
| BS(1,1)<br>(Converges to UKS solution)         | 3          | Yes                   | -3731.508782 |

Here, BS(m,n) refers to m unpaired electron in the Ni center and n unpaired electron in the ligand. Positive sign indicates  $\alpha$  spin, negative sign indicates  $\beta$  spin.

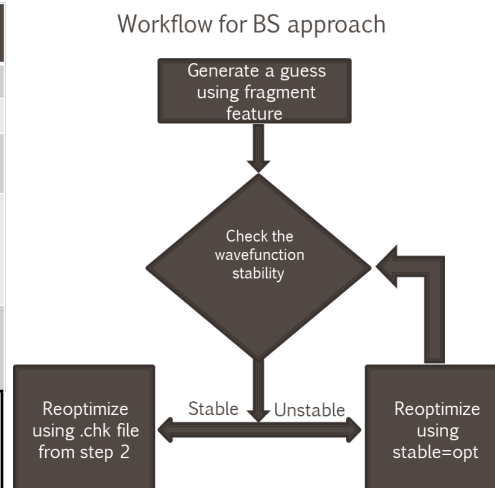

**Supplementary Figure 70.** Workflow for Broken-Symmetry DFT approach and the electronic energy obtained for various methods.

### Complete free energy profile for comproportionation of Ni-Chloride

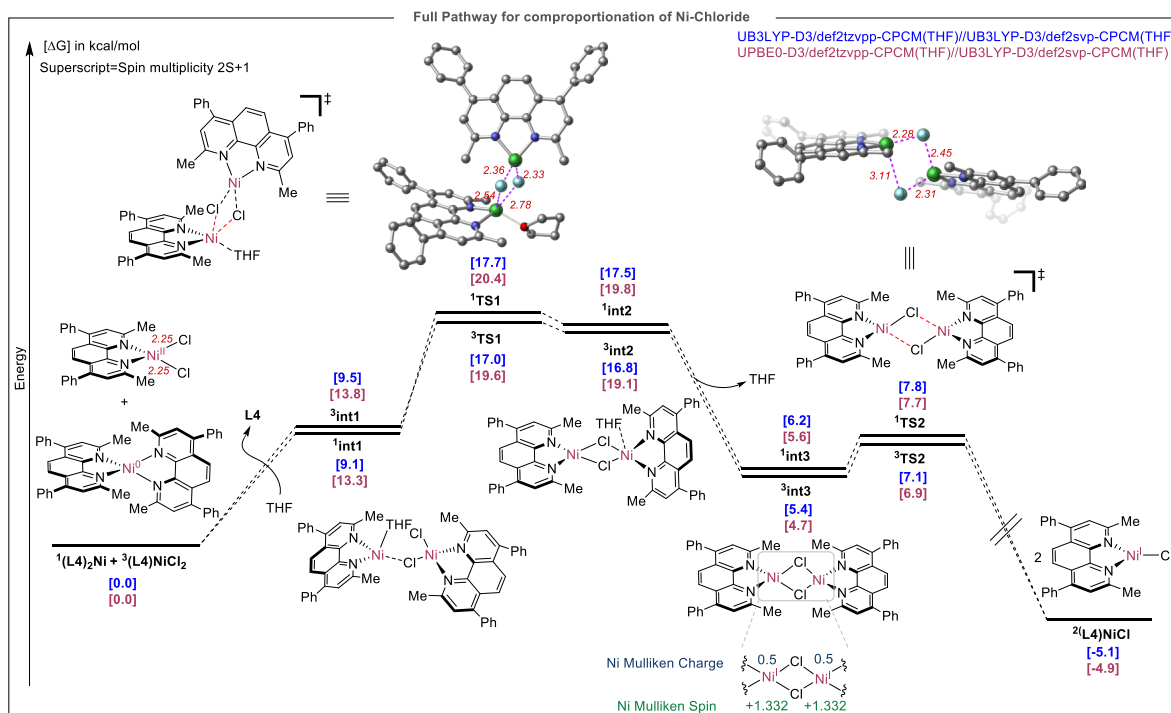

**Supplementary Figure 71.** Calculated energetics of the comproportionation step of Ni-Chlorides. Free energies (kcal/mol) were computed at the UB3LYP-D3/def2tzvpp-CPCM(THF)//UB3LYP-D3/def2svp-CPCM(THF) (in blue), and UPBE1PBE-D3/def2tzvpp-CPCM(THF)// UB3LYP-D3/def2-SVP-CPCM(THF) (in dark red) levels of theory.

The comproportionation pathway for Ni-Chlorides starts by dissociation of  $^1(\text{L}4)_2\text{Ni}$  which results in a monomeric  $(\text{L}4)\text{Ni}^0$  complex. The coordinating solvent THF can bind to the coordinatively unsaturated Ni center and stabilize the monomeric  $(\text{L}4)\text{Ni}^0$  species. This THF bound  $(\text{L}4)\text{Ni}^0$  combines with  $(\text{L}4)\text{NiCl}_2$  to form **int1**. In the next step, **int1** forms **int2** via **TS1**. The energy



barrier for **TS1** is about ~17 kcal and can easily be surmounted at room temperature. Apart from stabilizing the monomeric **(L4)Ni<sup>0</sup>** species, THF also prevents the 2 Ni centers from coming together and forming a Ni-Ni bond, thus favoring the formation of **int2** via **TS1**. Once **int2** is formed, the THF molecule leaves and forms a Ni<sup>I</sup> dimeric species bridged by two chloride ligands (**int3**). The fact that both the Ni centers in **int3** have the exact same Mulliken charge and spin density, indicates that both of them are having the same oxidation state i.e. +1. The conversion of Ni<sup>I</sup> dimeric species to Ni<sup>I</sup> monomeric species has a very low barrier (about ~2 kcal/mol) and the monomeric Ni<sup>I</sup> species is thermodynamically more stable as compared to its dimeric counterpart. Thus, dissociation of **int3** occurs via **TS2** and finally results in the monomeric Ni<sup>I</sup> chloride **(L4)NiCl**.

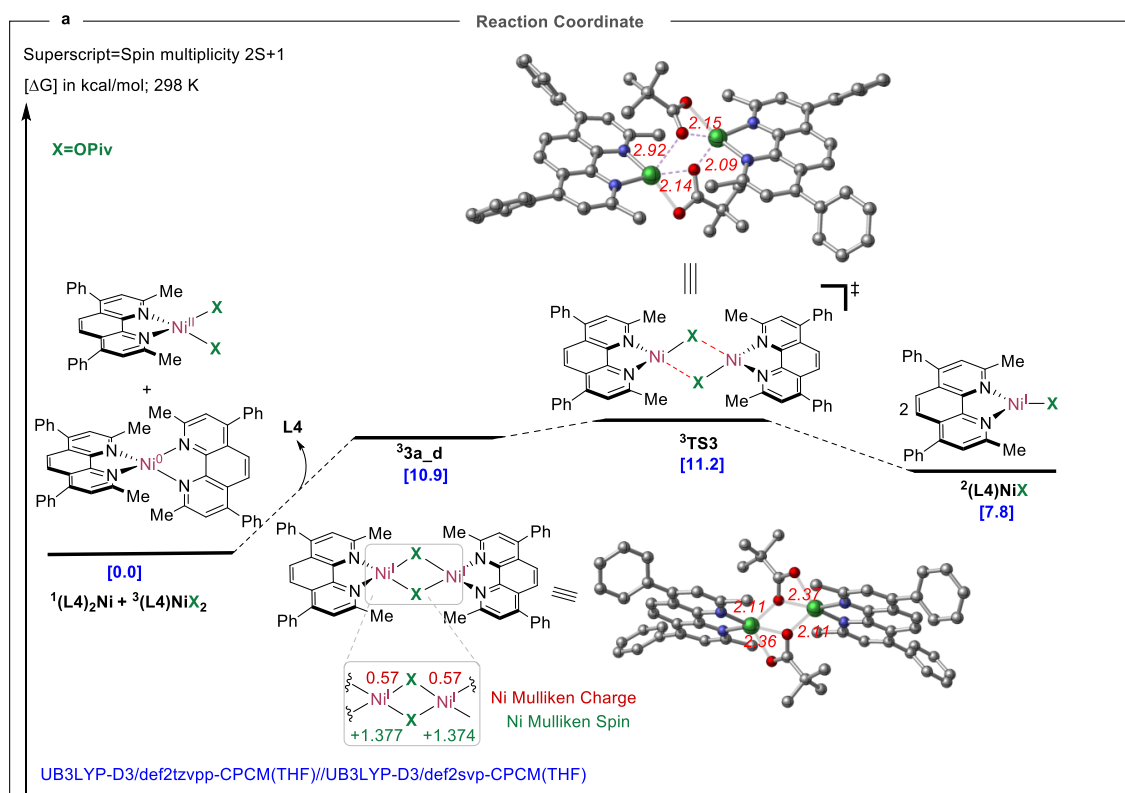

**Supplementary Figure 72.** Calculated energetics of the comproportionation step of Ni-Pivalates. Free energies (kcal/mol) were computed at the UB3LYP-D3/def2tzvp-CPCM(THF)//UB3LYP-D3/def2svp-CPCM(THF) (in blue) level of theory.

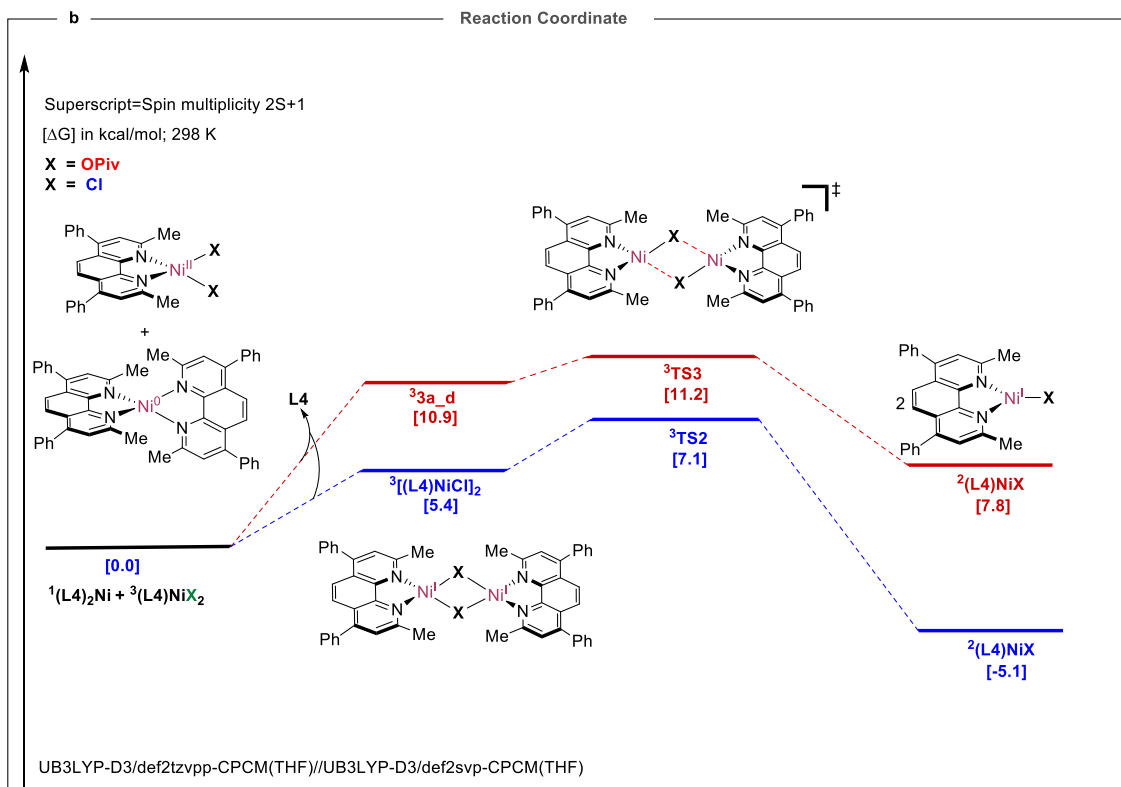

**Supplementary Figure 73.** Calculated energetics of the comproportionation step of Ni-Pivalates (in dark red) and Ni-Chlorides (in blue). Free energies (kcal/mol) were computed at the UB3LYP-D3/def2tzvpp-CPCM(THF)//UB3LYP-D3/def2svp-CPCM(THF) level of theory.

**Electronic Effects on stability of Ni-pseudohalides**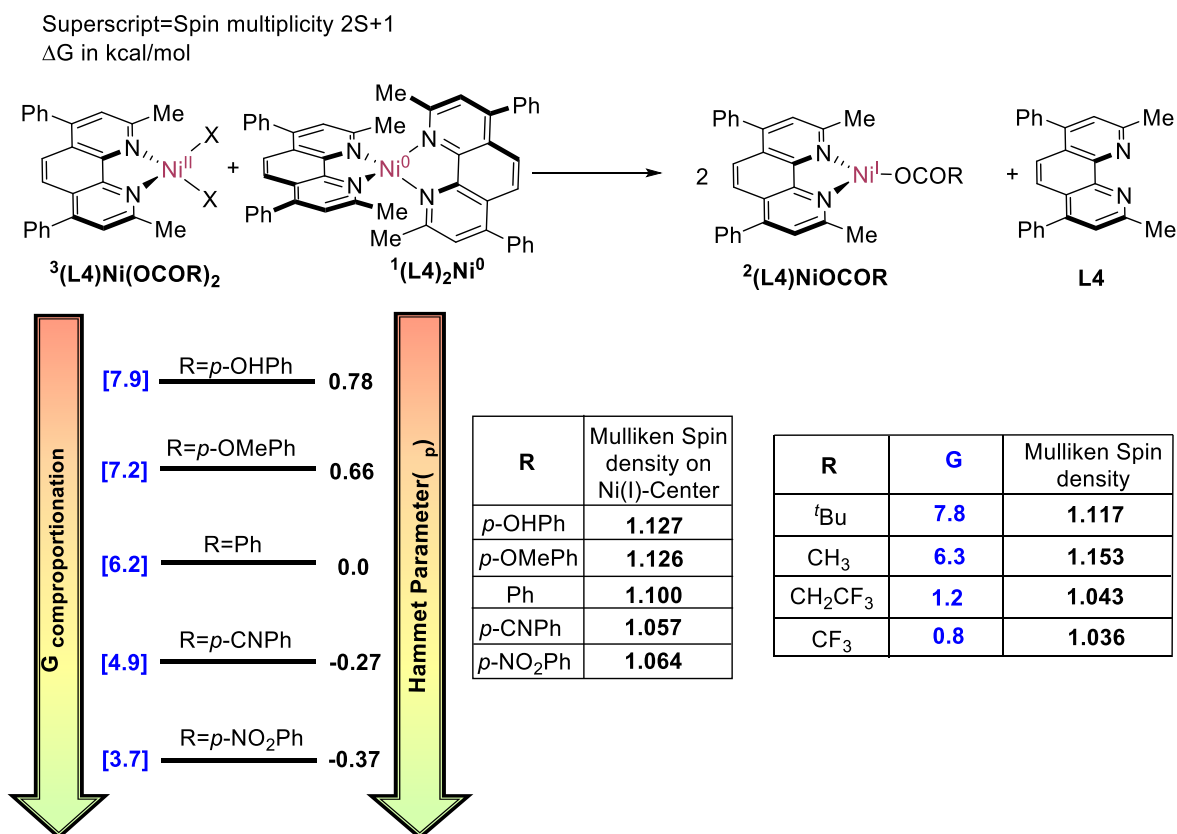

**Supplementary Figure 74.** Electronic Effect on stability of Ni pseudohalides. Free energies (kcal/mol) were computed at the UB3LYP-D3/def2tzvpp-CPCM(THF)//UB3LYP-D3/def2svp-CPCM(THF) levels of theory.

To explore the electronic effects on stability of pseudohalides, the energetics for a number of different pseudohalides were computed by varying the substituents. From the computations, it has been observed that it is possible to modulate the reactivity pattern of pseudohalides by changing electronic properties of the substituents. The more electron withdrawing substituents are observed to have more favorable Gibbs free energy of comproportionation ( $\Delta G_{\text{comproportionation}}$ ), whereas the electron donating groups show the opposite effect. It has also been observed that the Ni centers containing electron withdrawing groups have smaller Mulliken spin density as compared to those containing electron donating groups. This trend seems to correlate well with Hammett parameter of the substituents. The substituents having smaller Hammett parameter are more electron withdrawing in nature and thus have more favorable Gibbs free energy of comproportionation ( $\Delta G_{\text{comproportionation}}$ ). For example, the pseudohalide having -OH as substituent (Hammett parameter: 0.78, electron donating in nature) has higher spin density on its Ni center as compared to that of the pseudohalide having -NO<sub>2</sub> as substituent (Hammett parameter: -0.37, electron withdrawing in nature). As shown in **Supplementary Figure 74**, the Gibbs free energy of comproportionation ( $\Delta G_{\text{comproportionation}}$ ) for these species also vary accordingly. Although an exact correlation between spin density and  $\Delta G_{\text{comproportionation}}$  is difficult to establish, but our hypothesis is that electron withdrawing groups reduce spin density on the Ni center and thus stabilizes the Ni<sup>I</sup> species. This in turn results in a more favorable Gibbs free energy of comproportionation ( $\Delta G_{\text{comproportionation}}$ ) for Ni-pseudohalides having electron withdrawing substituents.

## Kohn-Sham molecular orbitals (KS MO) of Ni(I) species

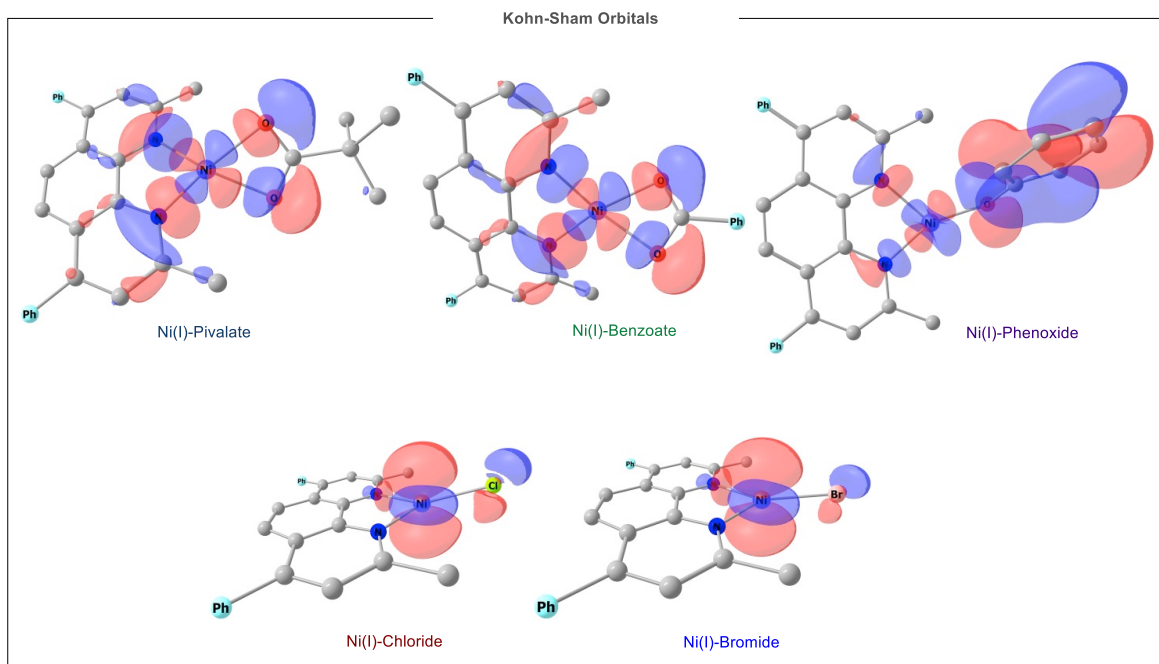

**Supplementary Figure 75.** Kohn-Sham orbitals (Contour Value= 0.025) depicting the SOMO of Ni(I)-halides and Ni(I)-Pseudohalides.

KS MO pictures of SOMO of these Ni(I) species points toward a molecular origin for the observed divergent reactivity pattern. In case of halides, the unpaired  $e^-$  is primarily located in the  $d_z^2$  orbital which is aligned with  $p_z$  orbital of Cl or Br in such a way that the overlapping lobes are in the same phase, thus facilitating effective delocalization of the unpaired electron. However, in the case of Ni(I)-pivalate, the unpaired  $e^-$  is located in  $d_{xy}$  orbital and the adjacent p orbitals on the O atoms are oriented in such a way that the overlapping lobes between these 2 orbitals are in opposite phases thus preventing electron delocalization. Similar picture was seen in Ni(I)-phenoxide, where the key orbitals on Ni(I) and O atoms are oriented in a way that leads to overlap of lobes having opposite phases, thus preventing effective delocalization of the unpaired  $e^-$ . An effective delocalization of unpaired  $e^-$  results in reduced spin density on the Ni center for halides which is not case for pseudohalides and this in turn gives rise to the observed divergent reactivity.

**Supplementary Table 4.** Cartesian coordinates (xyz format) and energies of all the structures involved in each reaction mechanism studied calculated at the UB3LYP-D3/def2-SVP-CPCM(THF) level of theory.

$^1(L4)NiCl_2$   
 $E(scf) = -3540.09855978$  a.u.

$v_{\min} = 27.02 \text{ cm}^{-1}$ 

|    |           |           |           |
|----|-----------|-----------|-----------|
| Ni | 27.546214 | 10.221762 | 1.788963  |
| N  | 28.904518 | 8.788784  | 2.250413  |
| N  | 26.897105 | 9.789285  | 3.660797  |
| C  | 27.576819 | 8.762580  | 4.223354  |
| C  | 28.668079 | 8.216044  | 3.454185  |
| C  | 28.102840 | 7.190630  | 6.017611  |
| H  | 27.921582 | 6.821001  | 7.026608  |
| C  | 29.436129 | 7.141865  | 3.962005  |
| C  | 29.135964 | 6.669680  | 5.286377  |
| H  | 29.762377 | 5.892339  | 5.723355  |
| C  | 25.499707 | 9.890621  | 5.579676  |
| H  | 24.648212 | 10.357532 | 6.076706  |
| C  | 27.262936 | 8.235504  | 5.498333  |
| C  | 26.153776 | 8.822406  | 6.187793  |
| C  | 25.681393 | 8.329566  | 7.507257  |
| C  | 29.898963 | 8.354209  | 1.479605  |
| C  | 25.883834 | 10.362513 | 4.306205  |
| C  | 30.704524 | 7.276431  | 1.905748  |
| H  | 31.493599 | 6.917791  | 1.243286  |
| C  | 30.484522 | 6.641243  | 3.125221  |
| C  | 25.482419 | 9.232470  | 8.567664  |
| H  | 25.719680 | 10.289486 | 8.425855  |
| C  | 25.377333 | 6.969730  | 7.706989  |
| H  | 25.500749 | 6.261435  | 6.884788  |
| C  | 24.707945 | 7.430142  | 9.990661  |
| H  | 24.331405 | 7.080465  | 10.955035 |
| C  | 25.182190 | 11.481142 | 3.596966  |
| H  | 24.397325 | 11.939458 | 4.211454  |
| H  | 24.741001 | 11.090187 | 2.664477  |
| H  | 25.921469 | 12.241974 | 3.297826  |
| C  | 30.074407 | 9.041679  | 0.158918  |
| H  | 30.947456 | 8.671668  | -0.392948 |
| H  | 30.164723 | 10.127783 | 0.323491  |
| H  | 29.163656 | 8.890585  | -0.444906 |
| C  | 25.005172 | 8.784122  | 9.801697  |
| H  | 24.866159 | 9.495689  | 10.619206 |
| C  | 24.891172 | 6.525695  | 8.938885  |
| H  | 24.649652 | 5.468822  | 9.075500  |
| C  | 31.323637 | 5.476742  | 3.508412  |
| C  | 32.927369 | 3.254778  | 4.152674  |
| H  | 33.549747 | 2.392605  | 4.404424  |
| C  | 30.735829 | 4.257326  | 3.894667  |
| H  | 29.647782 | 4.167177  | 3.925055  |
| C  | 31.532932 | 3.154765  | 4.210754  |
| H  | 31.061733 | 2.211935  | 4.498928  |

Go to: [\[table of contents\]](#) [\[references\]](#)

|    |           |           |          |
|----|-----------|-----------|----------|
| C  | 32.726228 | 5.563098  | 3.441866 |
| H  | 33.194025 | 6.505870  | 3.148528 |
| C  | 33.521364 | 4.461629  | 3.767931 |
| H  | 34.609732 | 4.547295  | 3.722314 |
| Cl | 26.092657 | 9.071067  | 0.512466 |
| Cl | 28.543525 | 12.232038 | 1.856174 |

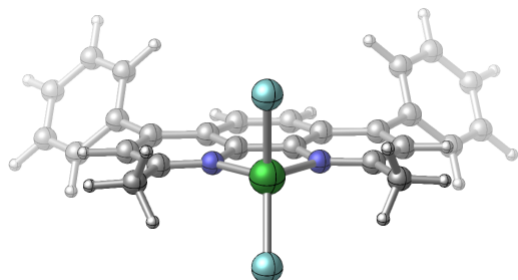

|                                              |                             |
|----------------------------------------------|-----------------------------|
| Zero-point correction=                       | 0.392871 (Hartree/Particle) |
| Thermal correction to Energy=                | 0.420055                    |
| Thermal correction to Enthalpy=              | 0.420999                    |
| Thermal correction to Gibbs Free Energy=     | 0.333804                    |
| Sum of electronic and zero-point Energies=   | -3539.705689                |
| Sum of electronic and thermal Energies=      | -3539.678505                |
| Sum of electronic and thermal Enthalpies=    | -3539.677561                |
| Sum of electronic and thermal Free Energies= | -3539.764756                |

### <sup>3</sup>(L4)NiCl<sub>2</sub>

E(scf) = -3540.12158529 a.u.

$v_{\min} = 32.49 \text{ cm}^{-1}$

|    |           |           |          |
|----|-----------|-----------|----------|
| Ni | 27.541061 | 10.223592 | 1.781686 |
| N  | 28.906071 | 8.789517  | 2.248416 |
| N  | 26.896287 | 9.791969  | 3.661677 |
| C  | 27.577495 | 8.765337  | 4.223000 |
| C  | 28.669039 | 8.218422  | 3.453152 |
| C  | 28.104673 | 7.193493  | 6.017858 |
| H  | 27.923715 | 6.824297  | 7.027052 |
| C  | 29.436957 | 7.144409  | 3.961977 |
| C  | 29.137592 | 6.672605  | 5.286554 |
| H  | 29.764414 | 5.895603  | 5.723505 |
| C  | 25.501022 | 9.892613  | 5.582647 |
| H  | 24.649917 | 10.359004 | 6.080782 |
| C  | 27.264649 | 8.237955  | 5.498278 |
| C  | 26.155629 | 8.823821  | 6.188938 |
| C  | 25.683422 | 8.328765  | 7.507644 |
| C  | 29.900954 | 8.353331  | 1.478696 |
| C  | 25.884011 | 10.364931 | 4.309200 |
| C  | 30.706173 | 7.275978  | 1.906016 |
| H  | 31.495253 | 6.916198  | 1.244205 |
| C  | 30.485294 | 6.642290  | 3.125976 |
| C  | 25.484371 | 9.229741  | 8.569654 |
| H  | 25.721927 | 10.286963 | 8.429905 |

Go to: [\[table of contents\]](#) [\[references\]](#)

|    |           |           |           |
|----|-----------|-----------|-----------|
| C  | 25.378873 | 6.968638  | 7.704672  |
| H  | 25.502403 | 6.261873  | 6.881171  |
| C  | 24.708723 | 7.424964  | 9.988915  |
| H  | 24.331619 | 7.073598  | 10.952453 |
| C  | 25.181346 | 11.483780 | 3.601243  |
| H  | 24.399892 | 11.944568 | 4.218176  |
| H  | 24.735012 | 11.092075 | 2.671410  |
| H  | 25.920506 | 12.242997 | 3.297489  |
| C  | 30.076819 | 9.038126  | 0.156558  |
| H  | 30.951783 | 8.669390  | -0.393061 |
| H  | 30.163692 | 10.125006 | 0.318344  |
| H  | 29.167615 | 8.882734  | -0.448589 |
| C  | 25.006534 | 8.779191  | 9.802659  |
| H  | 24.867429 | 9.489241  | 10.621467 |
| C  | 24.892052 | 6.522437  | 8.935511  |
| H  | 24.650070 | 5.465399  | 9.070003  |
| C  | 31.323243 | 5.477329  | 3.510370  |
| C  | 32.924618 | 3.254218  | 4.156332  |
| H  | 33.546088 | 2.391583  | 4.408734  |
| C  | 30.734097 | 4.258339  | 3.895931  |
| H  | 29.645943 | 4.169016  | 3.925171  |
| C  | 31.530045 | 3.155185  | 4.212828  |
| H  | 31.057845 | 2.212678  | 4.500411  |
| C  | 32.725952 | 5.562705  | 3.445360  |
| H  | 33.194745 | 6.505130  | 3.152496  |
| C  | 33.519921 | 4.460656  | 3.772327  |
| H  | 34.608400 | 4.545531  | 3.727951  |
| Cl | 26.083572 | 9.069717  | 0.501381  |
| Cl | 28.534803 | 12.243706 | 1.834715  |

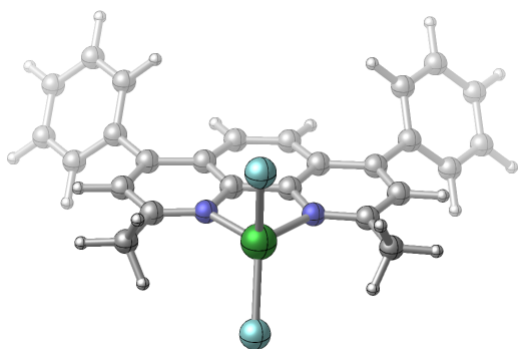

|                                              |                             |
|----------------------------------------------|-----------------------------|
| Zero-point correction=                       | 0.393077 (Hartree/Particle) |
| Thermal correction to Energy=                | 0.420142                    |
| Thermal correction to Enthalpy=              | 0.421086                    |
| Thermal correction to Gibbs Free Energy=     | 0.333472                    |
| Sum of electronic and zero-point Energies=   | -3539.728508                |
| Sum of electronic and thermal Energies=      | -3539.701443                |
| Sum of electronic and thermal Enthalpies=    | -3539.700499                |
| Sum of electronic and thermal Free Energies= | -3539.788113                |

uB3LYP-d3/def2-tzvpp-CPCM(THF)//uB3LYP-d3/def2-svp-CPCM(THF)

E(scf) = -3541.852976 a.u.

uPBE0-d3/def2-tzvpp-CPCM(THF)//uB3LYP-d3/def2-svp-CPCM(THF)

E(scf) = -3539.908122 a.u.

uB3LYP-d3/def2-svp(Gas)//uB3LYP-d3/def2-svp-CPCM(THF)

E(scf) = -3540.096927 a.u.

DLPNO-CCSD(T)/def2-svp(Gas)//uB3LYP-d3/def2-svp-CPCM(THF)

E(scf) = -3534.517825 a.u.

**<sup>1</sup>(L4)<sub>2</sub>Ni**

E(scf) = -3731.51663406 a.u.

$\nu_{\min} = 5.59 \text{ cm}^{-1}$

|   |           |           |           |
|---|-----------|-----------|-----------|
| N | 25.673614 | 10.186670 | -0.102440 |
| N | 26.825346 | 12.386071 | 0.710000  |
| C | 25.901158 | 12.535109 | -0.300111 |
| C | 25.273083 | 11.339416 | -0.740031 |
| C | 24.513001 | 13.803046 | -1.855457 |
| H | 24.171667 | 14.758522 | -2.254463 |
| C | 24.281547 | 11.358846 | -1.762953 |
| C | 23.906059 | 12.651722 | -2.277081 |
| H | 23.094709 | 12.714839 | -3.002643 |
| C | 27.161144 | 14.755716 | 0.676880  |
| H | 27.700325 | 15.615126 | 1.078793  |
| C | 25.565595 | 13.796552 | -0.870441 |
| C | 26.239255 | 14.945915 | -0.379957 |
| C | 26.017105 | 16.311509 | -0.912967 |
| C | 25.079683 | 9.022003  | -0.438382 |
| C | 27.434961 | 13.490871 | 1.194457  |
| C | 24.109290 | 8.966363  | -1.439516 |
| H | 23.681781 | 7.997571  | -1.703078 |
| C | 23.699681 | 10.121667 | -2.143939 |
| C | 25.819986 | 17.395264 | -0.032663 |
| H | 25.789310 | 17.210595 | 1.043924  |
| C | 26.044967 | 16.578940 | -2.297346 |
| H | 26.232896 | 15.762465 | -2.997906 |
| C | 25.660763 | 18.940048 | -1.895145 |
| H | 25.520995 | 19.955198 | -2.275001 |
| C | 28.425960 | 13.264691 | 2.300355  |
| H | 28.857850 | 14.204126 | 2.670763  |
| H | 29.239659 | 12.608088 | 1.948117  |
| H | 27.943495 | 12.729573 | 3.134460  |
| C | 25.535217 | 7.805553  | 0.316297  |
| H | 24.991884 | 6.901282  | 0.010952  |
| H | 25.397970 | 7.964560  | 1.398687  |
| H | 26.615582 | 7.647292  | 0.167118  |
| C | 25.640435 | 18.692692 | -0.517702 |
| H | 25.478822 | 19.514978 | 0.184236  |
| C | 25.866899 | 17.877127 | -2.781786 |



Go to: [\[table of contents\]](#) [\[references\]](#)

|    |           |           |           |
|----|-----------|-----------|-----------|
| H  | 25.899297 | 18.060625 | -3.858926 |
| C  | 22.690814 | 9.995223  | -3.223853 |
| C  | 20.780909 | 9.679806  | -5.284663 |
| H  | 20.041761 | 9.559890  | -6.080671 |
| C  | 22.892961 | 10.572745 | -4.494051 |
| H  | 23.812154 | 11.128811 | -4.690592 |
| C  | 21.948118 | 10.417700 | -5.511423 |
| H  | 22.129584 | 10.868983 | -6.490355 |
| C  | 21.515666 | 9.245106  | -3.015011 |
| H  | 21.336505 | 8.793324  | -2.036300 |
| C  | 20.570278 | 9.092459  | -4.031886 |
| H  | 19.661400 | 8.515149  | -3.843250 |
| Ni | 27.016870 | 10.503828 | 1.336576  |
| N  | 28.503230 | 9.223967  | 1.642754  |
| N  | 26.675923 | 10.135420 | 3.273110  |
| C  | 27.545270 | 9.213691  | 3.809410  |
| C  | 28.539229 | 8.717345  | 2.923762  |
| C  | 28.504404 | 7.868424  | 5.605004  |
| H  | 28.534945 | 7.576479  | 6.655006  |
| C  | 29.500385 | 7.760959  | 3.358974  |
| C  | 29.462106 | 7.391582  | 4.752255  |
| H  | 30.236227 | 6.730195  | 5.142128  |
| C  | 25.567999 | 10.246408 | 5.389766  |
| H  | 24.751047 | 10.662776 | 5.981240  |
| C  | 27.473481 | 8.772186  | 5.162455  |
| C  | 26.435080 | 9.297675  | 5.974348  |
| C  | 26.225103 | 8.897066  | 7.387689  |
| C  | 29.433972 | 8.798174  | 0.756371  |
| C  | 25.701288 | 10.639555 | 4.055852  |
| C  | 30.396548 | 7.857143  | 1.112146  |
| H  | 31.107179 | 7.522302  | 0.354610  |
| C  | 30.449543 | 7.294849  | 2.411080  |
| C  | 26.031303 | 9.877619  | 8.381276  |
| H  | 26.078793 | 10.934132 | 8.106303  |
| C  | 26.164124 | 7.541661  | 7.769661  |
| H  | 26.276511 | 6.764346  | 7.010817  |
| C  | 25.753999 | 8.166827  | 10.076963 |
| H  | 25.574083 | 7.884212  | 11.117208 |
| C  | 24.772722 | 11.629022 | 3.410691  |
| H  | 23.957748 | 11.928859 | 4.082989  |
| H  | 24.347505 | 11.198834 | 2.489342  |
| H  | 25.329758 | 12.527187 | 3.098955  |
| C  | 29.350578 | 9.395171  | -0.619171 |
| H  | 30.102863 | 8.977190  | -1.301563 |
| H  | 29.484360 | 10.489008 | -0.561886 |
| H  | 28.344297 | 9.234267  | -1.040190 |

Go to: [\[table of contents\]](#) [\[references\]](#)

|   |           |           |           |
|---|-----------|-----------|-----------|
| C | 25.802544 | 9.516833  | 9.711181  |
| H | 25.665563 | 10.294612 | 10.466927 |
| C | 25.932333 | 7.181463  | 9.099528  |
| H | 25.882320 | 6.124030  | 9.371842  |
| C | 31.472330 | 6.266361  | 2.716238  |
| C | 33.435224 | 4.291316  | 3.218918  |
| H | 34.193625 | 3.529302  | 3.415185  |
| C | 31.136295 | 5.053821  | 3.353770  |
| H | 30.097604 | 4.864163  | 3.632812  |
| C | 32.106369 | 4.080114  | 3.603656  |
| H | 31.819663 | 3.145699  | 4.093239  |
| C | 32.813576 | 6.458131  | 2.324612  |
| H | 33.098752 | 7.391959  | 1.833951  |
| C | 33.783190 | 5.484733  | 2.575697  |
| H | 34.818250 | 5.661494  | 2.271629  |

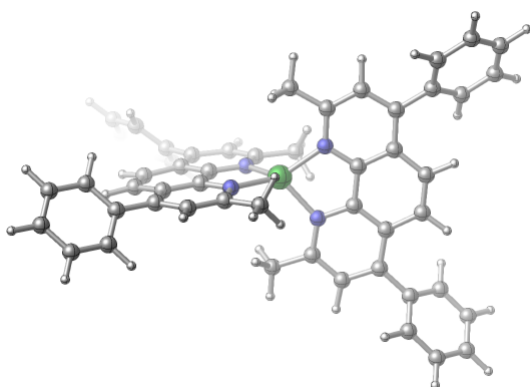

Zero-point correction= 0.775533 (Hartree/Particle)  
Thermal correction to Energy= 0.822860  
Thermal correction to Enthalpy= 0.823804  
Thermal correction to Gibbs Free Energy= 0.690134  
Sum of electronic and zero-point Energies= -3730.741101  
Sum of electronic and thermal Energies= -3730.693774  
Sum of electronic and thermal Enthalpies= -3730.692830  
Sum of electronic and thermal Free Energies= -3730.826500

uB3LYP-d3/def2-tzvp-CPCM(THF)//uB3LYP-d3/def2-svp-CPCM(THF)

E(scf) = -3734.107978 a.u.

uPBE0-d3/def2-tzvp-CPCM(THF)//uB3LYP-d3/def2-svp-CPCM(THF)

E(scf) = -3731.15489 a.u.

uB3LYP-d3/def2-svp(Gas)//uB3LYP-d3/def2-svp-CPCM(THF)

E(scf) = -3731.506936 a.u.

DLPNO-CCSD(T)/def2-svp(Gas)//uB3LYP-d3/def2-svp-CPCM(THF)

E(scf) = -3723.686706 a.u.

**<sup>3</sup>(L4)<sub>2</sub>Ni**

E(scf) = -3731.50878151 a.u.

$\nu_{\min} = 6.25 \text{ cm}^{-1}$

|   |           |           |          |
|---|-----------|-----------|----------|
| N | 28.930303 | 9.048355  | 2.247679 |
| N | 27.034847 | 10.121382 | 3.766058 |
| C | 27.541476 | 8.901183  | 4.176470 |

Go to: [\[table of contents\]](#) [\[references\]](#)

|   |           |           |           |
|---|-----------|-----------|-----------|
| C | 28.553206 | 8.329285  | 3.367267  |
| C | 27.753268 | 7.021847  | 5.722751  |
| H | 27.496551 | 6.539709  | 6.666454  |
| C | 29.146178 | 7.069225  | 3.697358  |
| C | 28.730262 | 6.470126  | 4.941524  |
| H | 29.228431 | 5.561574  | 5.281122  |
| C | 25.553717 | 10.112290 | 5.643672  |
| H | 24.742486 | 10.605569 | 6.180683  |
| C | 27.072781 | 8.239730  | 5.355658  |
| C | 26.033960 | 8.851301  | 6.097106  |
| C | 25.432812 | 8.247292  | 7.309359  |
| C | 29.879374 | 8.551064  | 1.434618  |
| C | 26.065010 | 10.707754 | 4.492597  |
| C | 30.489344 | 7.323734  | 1.690550  |
| H | 31.228798 | 6.941400  | 0.985688  |
| C | 30.126001 | 6.542716  | 2.822560  |
| C | 25.216228 | 9.031450  | 8.462315  |
| H | 25.536956 | 10.076066 | 8.464963  |
| C | 25.010197 | 6.901276  | 7.339017  |
| H | 25.127712 | 6.282931  | 6.446600  |
| C | 24.221124 | 7.146732  | 9.620192  |
| H | 23.755524 | 6.721156  | 10.512669 |
| C | 25.551944 | 12.019911 | 3.966614  |
| H | 24.784893 | 12.458818 | 4.618927  |
| H | 25.131519 | 11.880632 | 2.956810  |
| H | 26.385397 | 12.733028 | 3.855848  |
| C | 30.215903 | 9.383356  | 0.227838  |
| H | 31.004252 | 8.926354  | -0.385411 |
| H | 30.538096 | 10.389939 | 0.540790  |
| H | 29.314775 | 9.528714  | -0.390448 |
| C | 24.622967 | 8.487631  | 9.603628  |
| H | 24.477351 | 9.113837  | 10.487884 |
| C | 24.415106 | 6.358228  | 8.480260  |
| H | 24.090818 | 5.314189  | 8.474825  |
| C | 30.783839 | 5.230917  | 3.031170  |
| C | 32.068493 | 2.728435  | 3.351680  |
| H | 32.564368 | 1.762696  | 3.477654  |
| C | 30.043223 | 4.063779  | 3.313800  |
| H | 28.954977 | 4.123163  | 3.382891  |
| C | 30.678045 | 2.829751  | 3.474458  |
| H | 30.080607 | 1.939126  | 3.686654  |
| C | 32.182848 | 5.107965  | 2.896520  |
| H | 32.778246 | 5.998309  | 2.680017  |
| C | 32.817262 | 3.874527  | 3.059277  |
| H | 33.904116 | 3.808378  | 2.961393  |
| N | 26.691287 | 10.796415 | 0.518570  |

Go to: [\[table of contents\]](#) [\[references\]](#)

|   |           |           |           |
|---|-----------|-----------|-----------|
| N | 28.480896 | 12.537143 | 1.325534  |
| C | 27.802875 | 12.860802 | 0.170764  |
| C | 26.831504 | 11.912286 | -0.263813 |
| C | 27.315737 | 14.209177 | -1.804854 |
| H | 27.537495 | 15.069228 | -2.436871 |
| C | 26.074311 | 12.127088 | -1.451275 |
| C | 26.382410 | 13.300396 | -2.223161 |
| H | 25.877603 | 13.453875 | -3.177105 |
| C | 29.714739 | 14.579928 | 1.095060  |
| H | 30.471402 | 15.249375 | 1.508243  |
| C | 28.041507 | 14.050824 | -0.570122 |
| C | 29.017977 | 14.961259 | -0.075194 |
| C | 29.329992 | 16.258868 | -0.718643 |
| C | 25.812691 | 9.849386  | 0.156667  |
| C | 29.438672 | 13.394733 | 1.767443  |
| C | 25.021801 | 10.000425 | -0.992677 |
| H | 24.296727 | 9.222646  | -1.237132 |
| C | 25.117791 | 11.138683 | -1.807971 |
| C | 28.314562 | 17.162742 | -1.095650 |
| H | 27.269575 | 16.903067 | -0.912931 |
| C | 30.670297 | 16.647429 | -0.924089 |
| H | 31.474332 | 15.961452 | -0.646391 |
| C | 29.962680 | 18.763251 | -1.874859 |
| H | 30.206659 | 19.729493 | -2.323378 |
| C | 30.153651 | 12.985341 | 3.021598  |
| H | 30.905682 | 13.721936 | 3.333933  |
| H | 30.648734 | 12.009715 | 2.873984  |
| H | 29.427877 | 12.844029 | 3.841620  |
| C | 25.707512 | 8.638377  | 1.038285  |
| H | 24.986659 | 7.909404  | 0.645520  |
| H | 25.408181 | 8.935822  | 2.055056  |
| H | 26.694235 | 8.160940  | 1.138312  |
| C | 28.627596 | 18.397837 | -1.668259 |
| H | 27.822759 | 19.083750 | -1.945324 |
| C | 30.982533 | 17.882263 | -1.497136 |
| H | 32.029091 | 18.155878 | -1.654897 |
| C | 24.232226 | 11.262088 | -2.994264 |
| C | 22.503577 | 11.442032 | -5.217189 |
| H | 21.835587 | 11.512807 | -6.079208 |
| C | 24.113106 | 10.193270 | -3.903199 |
| H | 24.708704 | 9.290206  | -3.749252 |
| C | 23.260746 | 10.284356 | -5.006338 |
| H | 23.190142 | 9.447993  | -5.706378 |
| C | 23.459912 | 12.419135 | -3.214638 |
| H | 23.516693 | 13.246998 | -2.504557 |
| C | 22.603813 | 12.507088 | -4.315248 |

Go to: [\[table of contents\]](#) [\[references\]](#)

|    |           |           |           |
|----|-----------|-----------|-----------|
| H  | 22.007032 | 13.410392 | -4.465004 |
| Ni | 27.955690 | 10.818158 | 2.106802  |

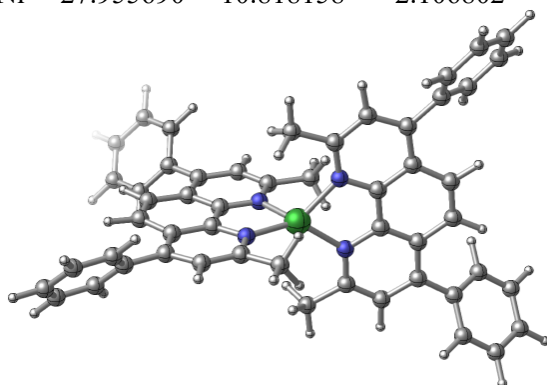

|                                              |                             |
|----------------------------------------------|-----------------------------|
| Zero-point correction=                       | 0.775223 (Hartree/Particle) |
| Thermal correction to Energy=                | 0.822472                    |
| Thermal correction to Enthalpy=              | 0.823416                    |
| Thermal correction to Gibbs Free Energy=     | 0.689557                    |
| Sum of electronic and zero-point Energies=   | -3730.733558                |
| Sum of electronic and thermal Energies=      | -3730.686310                |
| Sum of electronic and thermal Enthalpies=    | -3730.685365                |
| Sum of electronic and thermal Free Energies= | -3730.819225                |

#### <sup>1</sup>(L4)NiCl<sub>2</sub>

E(scf) = -3540.09855978 a.u.

$\nu_{\min} = 27.02 \text{ cm}^{-1}$

|    |           |           |          |
|----|-----------|-----------|----------|
| Ni | 27.546214 | 10.221762 | 1.788963 |
| N  | 28.904518 | 8.788784  | 2.250413 |
| N  | 26.897105 | 9.789285  | 3.660797 |
| C  | 27.576819 | 8.762580  | 4.223354 |
| C  | 28.668079 | 8.216044  | 3.454185 |
| C  | 28.102840 | 7.190630  | 6.017611 |
| H  | 27.921582 | 6.821001  | 7.026608 |
| C  | 29.436129 | 7.141865  | 3.962005 |
| C  | 29.135964 | 6.669680  | 5.286377 |
| H  | 29.762377 | 5.892339  | 5.723355 |
| C  | 25.499707 | 9.890621  | 5.579676 |
| H  | 24.648212 | 10.357532 | 6.076706 |
| C  | 27.262936 | 8.235504  | 5.498333 |
| C  | 26.153776 | 8.822406  | 6.187793 |
| C  | 25.681393 | 8.329566  | 7.507257 |
| C  | 29.898963 | 8.354209  | 1.479605 |
| C  | 25.883834 | 10.362513 | 4.306205 |
| C  | 30.704524 | 7.276431  | 1.905748 |
| H  | 31.493599 | 6.917791  | 1.243286 |
| C  | 30.484522 | 6.641243  | 3.125221 |
| C  | 25.482419 | 9.232470  | 8.567664 |
| H  | 25.719680 | 10.289486 | 8.425855 |
| C  | 25.377333 | 6.969730  | 7.706989 |
| H  | 25.500749 | 6.261435  | 6.884788 |

Go to: [\[table of contents\]](#) [\[references\]](#)

|    |           |           |           |
|----|-----------|-----------|-----------|
| C  | 24.707945 | 7.430142  | 9.990661  |
| H  | 24.331405 | 7.080465  | 10.955035 |
| C  | 25.182190 | 11.481142 | 3.596966  |
| H  | 24.397325 | 11.939458 | 4.211454  |
| H  | 24.741001 | 11.090187 | 2.664477  |
| H  | 25.921469 | 12.241974 | 3.297826  |
| C  | 30.074407 | 9.041679  | 0.158918  |
| H  | 30.947456 | 8.671668  | -0.392948 |
| H  | 30.164723 | 10.127783 | 0.323491  |
| H  | 29.163656 | 8.890585  | -0.444906 |
| C  | 25.005172 | 8.784122  | 9.801697  |
| H  | 24.866159 | 9.495689  | 10.619206 |
| C  | 24.891172 | 6.525695  | 8.938885  |
| H  | 24.649652 | 5.468822  | 9.075500  |
| C  | 31.323637 | 5.476742  | 3.508412  |
| C  | 32.927369 | 3.254778  | 4.152674  |
| H  | 33.549747 | 2.392605  | 4.404424  |
| C  | 30.735829 | 4.257326  | 3.894667  |
| H  | 29.647782 | 4.167177  | 3.925055  |
| C  | 31.532932 | 3.154765  | 4.210754  |
| H  | 31.061733 | 2.211935  | 4.498928  |
| C  | 32.726228 | 5.563098  | 3.441866  |
| H  | 33.194025 | 6.505870  | 3.148528  |
| C  | 33.521364 | 4.461629  | 3.767931  |
| H  | 34.609732 | 4.547295  | 3.722314  |
| Cl | 26.092657 | 9.071067  | 0.512466  |
| Cl | 28.543525 | 12.232038 | 1.856174  |

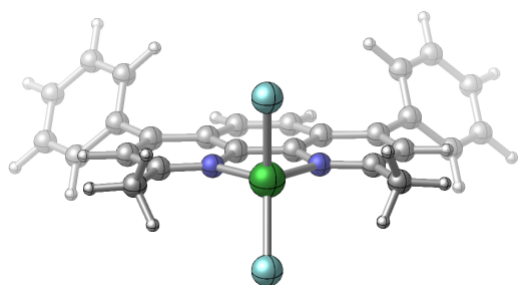

|                                              |                             |
|----------------------------------------------|-----------------------------|
| Zero-point correction=                       | 0.392871 (Hartree/Particle) |
| Thermal correction to Energy=                | 0.420055                    |
| Thermal correction to Enthalpy=              | 0.420999                    |
| Thermal correction to Gibbs Free Energy=     | 0.333804                    |
| Sum of electronic and zero-point Energies=   | -3539.705689                |
| Sum of electronic and thermal Energies=      | -3539.678505                |
| Sum of electronic and thermal Enthalpies=    | -3539.677561                |
| Sum of electronic and thermal Free Energies= | -3539.764756                |

### <sup>3</sup>(L4)NiCl<sub>2</sub>

E(scf) = -3540.12158529 a.u.

$\nu_{\min}$  = 32.49 cm<sup>-1</sup>

|    |           |           |          |
|----|-----------|-----------|----------|
| Ni | 27.541061 | 10.223592 | 1.781686 |
|----|-----------|-----------|----------|

Go to: [\[table of contents\]](#) [\[references\]](#)

|   |           |           |           |
|---|-----------|-----------|-----------|
| N | 28.906071 | 8.789517  | 2.248416  |
| N | 26.896287 | 9.791969  | 3.661677  |
| C | 27.577495 | 8.765337  | 4.223000  |
| C | 28.669039 | 8.218422  | 3.453152  |
| C | 28.104673 | 7.193493  | 6.017858  |
| H | 27.923715 | 6.824297  | 7.027052  |
| C | 29.436957 | 7.144409  | 3.961977  |
| C | 29.137592 | 6.672605  | 5.286554  |
| H | 29.764414 | 5.895603  | 5.723505  |
| C | 25.501022 | 9.892613  | 5.582647  |
| H | 24.649917 | 10.359004 | 6.080782  |
| C | 27.264649 | 8.237955  | 5.498278  |
| C | 26.155629 | 8.823821  | 6.188938  |
| C | 25.683422 | 8.328765  | 7.507644  |
| C | 29.900954 | 8.353331  | 1.478696  |
| C | 25.884011 | 10.364931 | 4.309200  |
| C | 30.706173 | 7.275978  | 1.906016  |
| H | 31.495253 | 6.916198  | 1.244205  |
| C | 30.485294 | 6.642290  | 3.125976  |
| C | 25.484371 | 9.229741  | 8.569654  |
| H | 25.721927 | 10.286963 | 8.429905  |
| C | 25.378873 | 6.968638  | 7.704672  |
| H | 25.502403 | 6.261873  | 6.881171  |
| C | 24.708723 | 7.424964  | 9.988915  |
| H | 24.331619 | 7.073598  | 10.952453 |
| C | 25.181346 | 11.483780 | 3.601243  |
| H | 24.399892 | 11.944568 | 4.218176  |
| H | 24.735012 | 11.092075 | 2.671410  |
| H | 25.920506 | 12.242997 | 3.297489  |
| C | 30.076819 | 9.038126  | 0.156558  |
| H | 30.951783 | 8.669390  | -0.393061 |
| H | 30.163692 | 10.125006 | 0.318344  |
| H | 29.167615 | 8.882734  | -0.448589 |
| C | 25.006534 | 8.779191  | 9.802659  |
| H | 24.867429 | 9.489241  | 10.621467 |
| C | 24.892052 | 6.522437  | 8.935511  |
| H | 24.650070 | 5.465399  | 9.070003  |
| C | 31.323243 | 5.477329  | 3.510370  |
| C | 32.924618 | 3.254218  | 4.156332  |
| H | 33.546088 | 2.391583  | 4.408734  |
| C | 30.734097 | 4.258339  | 3.895931  |
| H | 29.645943 | 4.169016  | 3.925171  |
| C | 31.530045 | 3.155185  | 4.212828  |
| H | 31.057845 | 2.212678  | 4.500411  |
| C | 32.725952 | 5.562705  | 3.445360  |
| H | 33.194745 | 6.505130  | 3.152496  |

Go to: [\[table of contents\]](#) [\[references\]](#)

|    |           |           |          |
|----|-----------|-----------|----------|
| C  | 33.519921 | 4.460656  | 3.772327 |
| H  | 34.608400 | 4.545531  | 3.727951 |
| Cl | 26.083572 | 9.069717  | 0.501381 |
| Cl | 28.534803 | 12.243706 | 1.834715 |

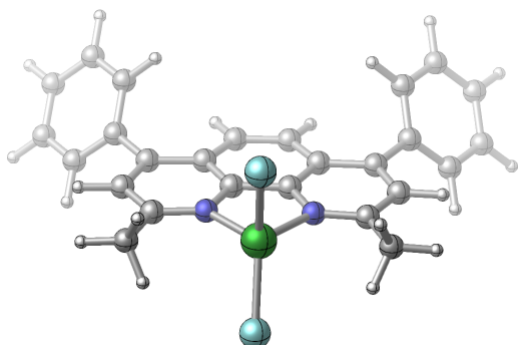

|                                              |                             |
|----------------------------------------------|-----------------------------|
| Zero-point correction=                       | 0.393077 (Hartree/Particle) |
| Thermal correction to Energy=                | 0.420142                    |
| Thermal correction to Enthalpy=              | 0.421086                    |
| Thermal correction to Gibbs Free Energy=     | 0.333472                    |
| Sum of electronic and zero-point Energies=   | -3539.728508                |
| Sum of electronic and thermal Energies=      | -3539.701443                |
| Sum of electronic and thermal Enthalpies=    | -3539.700499                |
| Sum of electronic and thermal Free Energies= | -3539.788113                |

uB3LYP-d3/def2-tzvpp-CPCM(THF)//uB3LYP-d3/def2-svp-CPCM(THF)

E(scf) = -3541.852976 a.u.

uPBE0-d3/def2-tzvpp-CPCM(THF)//uB3LYP-d3/def2-svp-CPCM(THF)

E(scf) = -3539.908122 a.u.

uB3LYP-d3/def2-svp(Gas)//uB3LYP-d3/def2-svp-CPCM(THF)

E(scf) = -3540.096927 a.u.

DLPNO-CCSD(T)/def2-svp(Gas)//uB3LYP-d3/def2-svp-CPCM(THF)

E(scf) = -3534.517825 a.u.

### THF

E(scf) = -232.288794659 a.u.

$\nu_{\min} = 86.91 \text{ cm}^{-1}$

|   |           |           |           |
|---|-----------|-----------|-----------|
| C | 28.768646 | 13.937104 | 1.535776  |
| O | 28.112432 | 12.758656 | 1.063704  |
| C | 27.237256 | 13.081196 | -0.018945 |
| C | 27.119529 | 14.608006 | -0.029330 |
| C | 28.503951 | 15.020095 | 0.485850  |
| H | 28.350240 | 14.230595 | 2.519136  |
| H | 29.841901 | 13.724043 | 1.677561  |
| H | 27.667535 | 12.712451 | -0.971367 |
| H | 26.269608 | 12.572879 | 0.131473  |
| H | 26.877572 | 15.012047 | -1.023566 |
| H | 26.336722 | 14.938184 | 0.673954  |
| H | 29.247386 | 14.958219 | -0.326486 |
| H | 28.537678 | 16.037688 | 0.902574  |



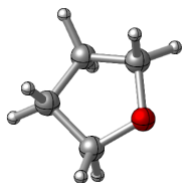

|                                              |                             |
|----------------------------------------------|-----------------------------|
| Zero-point correction=                       | 0.116134 (Hartree/Particle) |
| Thermal correction to Energy=                | 0.120986                    |
| Thermal correction to Enthalpy=              | 0.121930                    |
| Thermal correction to Gibbs Free Energy=     | 0.088164                    |
| Sum of electronic and zero-point Energies=   | -232.172661                 |
| Sum of electronic and thermal Energies=      | -232.167809                 |
| Sum of electronic and thermal Enthalpies=    | -232.166865                 |
| Sum of electronic and thermal Free Energies= | -232.200631                 |

uB3LYP-d3/def2-tzvpp-CPCM(THF)//uB3LYP-d3/def2-svp-CPCM(THF)

E(scf) = -232.556107 a.u.

uPBE0-d3/def2-tzvpp-CPCM(THF)//uB3LYP-d3/def2-svp-CPCM(THF)

E(scf) = -232.280495 a.u.

#### L4

E(scf) = -1111.61693113 a.u.

$v_{\min} = 27.57 \text{ cm}^{-1}$

|   |           |           |           |
|---|-----------|-----------|-----------|
| N | 28.789699 | 8.668626  | 2.120143  |
| N | 26.797167 | 9.772033  | 3.628736  |
| C | 27.518743 | 8.764566  | 4.169765  |
| C | 28.586550 | 8.174480  | 3.362340  |
| C | 28.147992 | 7.254635  | 6.017801  |
| H | 28.015595 | 6.931355  | 7.050463  |
| C | 29.374643 | 7.118106  | 3.909653  |
| C | 29.145910 | 6.704636  | 5.264425  |
| H | 29.796887 | 5.949688  | 5.705715  |
| C | 25.512601 | 9.900576  | 5.648523  |
| H | 24.688151 | 10.374190 | 6.186394  |
| C | 27.284584 | 8.270826  | 5.488109  |
| C | 26.214706 | 8.860098  | 6.236366  |
| C | 25.835824 | 8.397814  | 7.599907  |
| C | 29.757457 | 8.166738  | 1.370652  |
| C | 25.833183 | 10.335687 | 4.338111  |
| C | 30.580799 | 7.103916  | 1.819983  |
| H | 31.348630 | 6.700089  | 1.156131  |
| C | 30.396304 | 6.554346  | 3.078949  |
| C | 25.737418 | 9.321285  | 8.656330  |
| H | 25.983578 | 10.370334 | 8.474828  |
| C | 25.519753 | 7.049598  | 7.851646  |
| H | 25.571195 | 6.323687  | 7.036958  |
| C | 25.037209 | 7.563620  | 10.171456 |
| H | 24.729592 | 7.239428  | 11.168760 |
| C | 25.052637 | 11.462558 | 3.710727  |

Go to: [\[table of contents\]](#) [\[references\]](#)

|   |           |           |           |
|---|-----------|-----------|-----------|
| H | 23.982754 | 11.205766 | 3.636100  |
| H | 25.439198 | 11.674412 | 2.705126  |
| H | 25.121379 | 12.377240 | 4.322662  |
| C | 29.965236 | 8.744946  | -0.006036 |
| H | 29.824718 | 7.973611  | -0.781577 |
| H | 30.991760 | 9.131173  | -0.119634 |
| H | 29.253516 | 9.562063  | -0.183116 |
| C | 25.345603 | 8.906959  | 9.932362  |
| H | 25.283287 | 9.636870  | 10.743441 |
| C | 25.122373 | 6.637234  | 9.126072  |
| H | 24.873561 | 5.587645  | 9.301942  |
| C | 31.249863 | 5.414877  | 3.514461  |
| C | 32.887044 | 3.242208  | 4.252936  |
| H | 33.521461 | 2.400394  | 4.541385  |
| C | 30.681836 | 4.205201  | 3.955960  |
| H | 29.594886 | 4.105159  | 3.998471  |
| C | 31.493916 | 3.128137  | 4.320069  |
| H | 31.035689 | 2.193673  | 4.653648  |
| C | 32.651046 | 5.514291  | 3.442092  |
| H | 33.104559 | 6.449353  | 3.104414  |
| C | 33.462899 | 4.438525  | 3.812429  |
| H | 34.550066 | 4.536709  | 3.758454  |

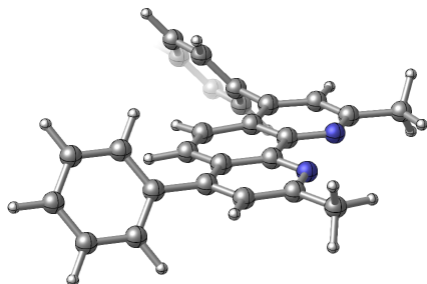

Zero-point correction= 0.386779 (Hartree/Particle)  
Thermal correction to Energy= 0.409160  
Thermal correction to Enthalpy= 0.410105  
Thermal correction to Gibbs Free Energy= 0.333393  
Sum of electronic and zero-point Energies= -1111.230152  
Sum of electronic and thermal Energies= -1111.207771  
Sum of electronic and thermal Enthalpies= -1111.206827  
Sum of electronic and thermal Free Energies= -1111.283538

uB3LYP-d3/def2-tzvpp-CPCM(THF)//uB3LYP-d3/def2-svp-CPCM(THF)  
E(scf) = -1112.814451 a.u.  
uPBE0-d3/def2-tzvpp-CPCM(THF)//uB3LYP-d3/def2-svp-CPCM(THF)  
E(scf) = -1111.48404 a.u.  
uB3LYP-d3/def2-svp(Gas)//uB3LYP-d3/def2-svp-CPCM(THF)  
E(scf) = -1111.606662  
DLPNO-CCSD(T)/def2-svp(Gas)//uB3LYP-d3/def2-svp-CPCM(THF)  
E(scf) = -1108.331152

#### **<sup>1</sup>int1**

E(scf) = -6392.32663920 a.u.  
 $\nu_{\min} = 11.88 \text{ cm}^{-1}$

Go to: [\[table of contents\]](#) [\[references\]](#)

|    |           |           |           |
|----|-----------|-----------|-----------|
| C  | 1.744642  | 4.438051  | -0.815577 |
| C  | 0.842654  | 4.664842  | -1.872178 |
| C  | -0.541204 | 4.643631  | -1.671835 |
| N  | 1.299717  | 4.209286  | 0.424124  |
| C  | -1.015108 | 4.440327  | -0.343168 |
| C  | -0.041478 | 4.229310  | 0.668854  |
| C  | -0.424415 | 4.027729  | 2.033576  |
| N  | 0.606965  | 3.859160  | 2.920435  |
| C  | -1.794207 | 4.013395  | 2.403757  |
| C  | -2.106244 | 3.795751  | 3.778472  |
| C  | 0.303433  | 3.760611  | 4.234811  |
| C  | -1.023017 | 3.712096  | 4.670523  |
| Ni | 2.362123  | 3.603692  | 2.043428  |
| H  | 1.239646  | 4.825963  | -2.876069 |
| H  | -1.213599 | 3.574268  | 5.736161  |
| Cl | 3.079260  | 1.540768  | 0.876492  |
| Cl | 4.375589  | 4.315403  | 2.899506  |
| C  | 4.153381  | 1.048948  | 5.848087  |
| C  | 4.141837  | 0.937879  | 7.253589  |
| C  | 2.983141  | 0.625612  | 7.954497  |
| N  | 3.043232  | 0.833938  | 5.130408  |
| C  | 1.794215  | 0.410552  | 7.193985  |
| C  | 1.882659  | 0.543740  | 5.783547  |
| C  | 0.697257  | 0.432116  | 4.967221  |
| N  | 0.863195  | 0.594826  | 3.621457  |
| C  | -0.559977 | 0.185154  | 5.580384  |
| C  | -1.713833 | 0.152657  | 4.741467  |
| C  | -0.223390 | 0.515879  | 2.834383  |
| C  | -1.505586 | 0.304932  | 3.375163  |
| Ni | 2.801495  | 0.898997  | 3.128814  |
| H  | 5.064033  | 1.140102  | 7.800827  |
| H  | -2.359488 | 0.296943  | 2.696666  |
| C  | 5.410444  | 1.436893  | 5.131030  |
| H  | 5.894775  | 0.538465  | 4.723591  |
| H  | 5.183208  | 2.112908  | 4.293609  |
| H  | 6.114896  | 1.932316  | 5.813475  |
| C  | -0.043567 | 0.683841  | 1.358385  |
| H  | 0.489776  | 1.619621  | 1.157860  |
| H  | 0.600257  | -0.112391 | 0.954115  |
| H  | -1.006766 | 0.679430  | 0.831681  |
| C  | 1.466768  | 3.741173  | 5.177072  |
| H  | 2.235342  | 3.061674  | 4.789724  |
| H  | 1.931450  | 4.740536  | 5.217979  |
| H  | 1.177713  | 3.433955  | 6.190852  |
| C  | 3.229631  | 4.400291  | -1.039518 |
| H  | 3.762028  | 4.710085  | -0.128176 |

Go to: [\[table of contents\]](#) [\[references\]](#)

|   |           |           |           |
|---|-----------|-----------|-----------|
| H | 3.545290  | 3.365166  | -1.246965 |
| H | 3.525476  | 5.036066  | -1.886114 |
| O | 4.666311  | -0.310059 | 2.768810  |
| C | 4.249749  | -1.551209 | 2.167599  |
| C | 5.804855  | 0.229262  | 2.056475  |
| C | 5.400621  | -1.971321 | 1.257654  |
| H | 4.021269  | -2.267309 | 2.971855  |
| H | 3.331203  | -1.367205 | 1.583575  |
| C | 5.926428  | -0.608289 | 0.787764  |
| H | 5.612051  | 1.293922  | 1.869151  |
| H | 6.699261  | 0.126136  | 2.695713  |
| H | 5.069490  | -2.623672 | 0.436177  |
| H | 6.173776  | -2.507607 | 1.832668  |
| H | 5.265495  | -0.193069 | 0.011596  |
| H | 6.955132  | -0.642602 | 0.399794  |
| C | -2.392521 | 4.484060  | 0.065797  |
| H | -3.158633 | 4.711394  | -0.675686 |
| C | -2.759433 | 4.278489  | 1.368388  |
| H | -3.813202 | 4.346779  | 1.638560  |
| C | 0.528387  | 0.050681  | 7.766509  |
| H | 0.468861  | -0.150635 | 8.835852  |
| C | -0.594139 | -0.053908 | 6.995974  |
| H | -1.538081 | -0.339978 | 7.458932  |
| C | -1.452159 | 4.834175  | -2.830350 |
| C | -2.490988 | 3.922439  | -3.099531 |
| C | -1.260624 | 5.914144  | -3.712556 |
| C | -3.317995 | 4.091961  | -4.212766 |
| H | -2.636675 | 3.063321  | -2.441017 |
| C | -2.091905 | 6.085907  | -4.822334 |
| H | -0.461651 | 6.632673  | -3.514282 |
| C | -3.124111 | 5.176005  | -5.076017 |
| H | -4.114244 | 3.369681  | -4.409767 |
| H | -1.934171 | 6.936402  | -5.490387 |
| H | -3.773439 | 5.309483  | -5.944850 |
| C | -3.494006 | 3.672810  | 4.282314  |
| C | -3.899568 | 4.369042  | 5.438026  |
| C | -4.432240 | 2.831008  | 3.650941  |
| C | -5.201217 | 4.246642  | 5.929927  |
| H | -3.190126 | 5.030068  | 5.941657  |
| C | -5.732042 | 2.709078  | 4.142916  |
| H | -4.127434 | 2.245255  | 2.781850  |
| C | -6.124716 | 3.420211  | 5.281491  |
| H | -5.496590 | 4.803957  | 6.822699  |
| H | -6.436086 | 2.036721  | 3.647017  |
| H | -7.141226 | 3.319532  | 5.669514  |
| C | -3.090779 | -0.020153 | 5.267596  |

Go to: [\[table of contents\]](#) [\[references\]](#)

|   |           |           |           |
|---|-----------|-----------|-----------|
| C | -3.576007 | 0.782750  | 6.317074  |
| C | -3.957443 | -0.963497 | 4.685905  |
| C | -4.883209 | 0.633823  | 6.780973  |
| H | -2.934445 | 1.553522  | 6.747270  |
| C | -5.265633 | -1.113722 | 5.153717  |
| H | -3.594461 | -1.594952 | 3.871393  |
| C | -5.731229 | -0.318149 | 6.205558  |
| H | -5.247430 | 1.280422  | 7.582032  |
| H | -5.922100 | -1.858407 | 4.696501  |
| H | -6.755479 | -0.432179 | 6.569109  |
| C | 3.019455  | 0.557807  | 9.438901  |
| C | 2.136183  | 1.319081  | 10.227697 |
| C | 3.985042  | -0.237259 | 10.083375 |
| C | 2.212610  | 1.278225  | 11.622059 |
| H | 1.398749  | 1.962769  | 9.743034  |
| C | 4.055750  | -0.282405 | 11.478144 |
| H | 4.675135  | -0.834443 | 9.482449  |
| C | 3.169458  | 0.474551  | 12.251897 |
| H | 1.524713  | 1.882036  | 12.219159 |
| H | 4.805638  | -0.913064 | 11.962166 |
| H | 3.225971  | 0.440940  | 13.342723 |

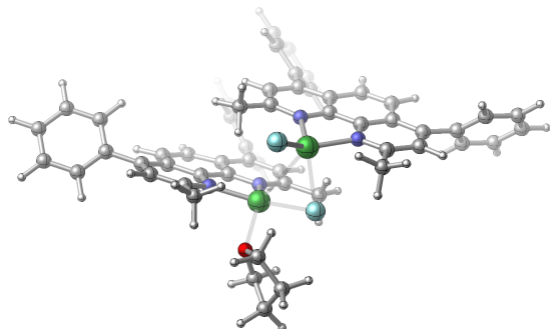

|                                              |                             |
|----------------------------------------------|-----------------------------|
| Zero-point correction=                       | 0.901231 (Hartree/Particle) |
| Thermal correction to Energy=                | 0.959704                    |
| Thermal correction to Enthalpy=              | 0.960648                    |
| Thermal correction to Gibbs Free Energy=     | 0.804260                    |
| Sum of electronic and zero-point Energies=   | -6391.425409                |
| Sum of electronic and thermal Energies=      | -6391.366935                |
| Sum of electronic and thermal Enthalpies=    | -6391.365991                |
| Sum of electronic and thermal Free Energies= | -6391.522380                |

uB3LYP-d3/def2-tzvpp-CPCM(THF)//uB3LYP-d3/def2-svp-CPCM(THF)

E(scf) = -6395.714068 a.u.

uPBE0-d3/def2-tzvpp-CPCM(THF)//uB3LYP-d3/def2-svp-CPCM(THF)

E(scf) = -6391.864264 a.u.

**<sup>3</sup>int1**

E(scf) = -6392.32671282 a.u.

$\nu_{\min} = 11.36 \text{ cm}^{-1}$

|   |          |          |           |
|---|----------|----------|-----------|
| C | 1.762166 | 4.422991 | -0.818740 |
| C | 0.860714 | 4.659081 | -1.873904 |

Go to: [\[table of contents\]](#) [\[references\]](#)

|    |           |           |           |
|----|-----------|-----------|-----------|
| C  | -0.523154 | 4.647851  | -1.672147 |
| N  | 1.316796  | 4.198368  | 0.421508  |
| C  | -0.997370 | 4.445563  | -0.343620 |
| C  | -0.024024 | 4.227529  | 0.667444  |
| C  | -0.407324 | 4.023398  | 2.031343  |
| N  | 0.623743  | 3.844739  | 2.917188  |
| C  | -1.776898 | 4.010772  | 2.402040  |
| C  | -2.089273 | 3.784982  | 3.775449  |
| C  | 0.320099  | 3.750402  | 4.232266  |
| C  | -1.005775 | 3.702208  | 4.668164  |
| Ni | 2.370548  | 3.557818  | 2.036472  |
| H  | 1.257737  | 4.817581  | -2.878185 |
| H  | -1.196463 | 3.563632  | 5.733706  |
| Cl | 2.999173  | 1.477413  | 0.843722  |
| Cl | 4.435679  | 4.276383  | 2.757161  |
| C  | 4.111997  | 1.066883  | 5.843295  |
| C  | 4.102145  | 0.944510  | 7.248308  |
| C  | 2.949419  | 0.610646  | 7.947045  |
| N  | 3.006342  | 0.837369  | 5.122633  |
| C  | 1.763118  | 0.386192  | 7.184541  |
| C  | 1.849160  | 0.529329  | 5.774700  |
| C  | 0.661145  | 0.412125  | 4.960556  |
| N  | 0.817571  | 0.584098  | 3.615436  |
| C  | -0.591700 | 0.152545  | 5.578283  |
| C  | -1.749968 | 0.119742  | 4.745263  |
| C  | -0.271545 | 0.504419  | 2.834162  |
| C  | -1.550924 | 0.282735  | 3.380449  |
| Ni | 2.767027  | 0.901994  | 3.119231  |
| H  | 5.021186  | 1.157813  | 7.796689  |
| H  | -2.408398 | 0.274068  | 2.706652  |
| C  | 5.364360  | 1.490543  | 5.138546  |
| H  | 5.894421  | 0.605247  | 4.760030  |
| H  | 5.127212  | 2.137960  | 4.282252  |
| H  | 6.033916  | 2.029010  | 5.823798  |
| C  | -0.107756 | 0.679677  | 1.357228  |
| H  | 0.428548  | 1.612554  | 1.153565  |
| H  | 0.526039  | -0.118289 | 0.941220  |
| H  | -1.077703 | 0.683004  | 0.843094  |
| C  | 1.483890  | 3.738434  | 5.174518  |
| H  | 2.256479  | 3.063556  | 4.787347  |
| H  | 1.937875  | 4.742897  | 5.219069  |
| H  | 1.198201  | 3.427063  | 6.188039  |
| C  | 3.245978  | 4.366436  | -1.044394 |
| H  | 3.783003  | 4.688185  | -0.139837 |
| H  | 3.549069  | 3.323037  | -1.228655 |
| H  | 3.547031  | 4.979942  | -1.905361 |

Go to: [\[table of contents\]](#) [\[references\]](#)

|   |           |           |           |
|---|-----------|-----------|-----------|
| O | 4.697868  | -0.207219 | 2.777425  |
| C | 4.356694  | -1.478960 | 2.195297  |
| C | 5.805357  | 0.388076  | 2.059800  |
| C | 5.531857  | -1.843934 | 1.292084  |
| H | 4.171085  | -2.195810 | 3.010032  |
| H | 3.429185  | -1.358580 | 1.609019  |
| C | 5.979773  | -0.459464 | 0.803983  |
| H | 5.552892  | 1.438355  | 1.861107  |
| H | 6.702105  | 0.344503  | 2.702677  |
| H | 5.240602  | -2.525559 | 0.479271  |
| H | 6.333442  | -2.327061 | 1.875295  |
| H | 5.299390  | -0.094963 | 0.019476  |
| H | 7.010495  | -0.440312 | 0.420183  |
| C | -2.374376 | 4.493507  | 0.066220  |
| H | -3.139976 | 4.726442  | -0.674074 |
| C | -2.741607 | 4.283415  | 1.368087  |
| H | -3.795123 | 4.353565  | 1.638976  |
| C | 0.503137  | 0.010147  | 7.758713  |
| H | 0.449346  | -0.199199 | 8.826770  |
| C | -0.620948 | -0.097567 | 6.991451  |
| H | -1.561716 | -0.393637 | 7.454585  |
| C | -1.433526 | 4.844666  | -2.830140 |
| C | -2.476916 | 3.938440  | -3.100297 |
| C | -1.236318 | 5.924331  | -3.711442 |
| C | -3.302813 | 4.113041  | -4.213585 |
| H | -2.626954 | 3.079408  | -2.442651 |
| C | -2.066482 | 6.101215  | -4.821262 |
| H | -0.433519 | 6.638417  | -3.512551 |
| C | -3.103233 | 5.196765  | -5.075930 |
| H | -4.102588 | 3.394884  | -4.411409 |
| H | -1.904203 | 6.951362  | -5.488674 |
| H | -3.751585 | 5.334149  | -5.944887 |
| C | -3.476461 | 3.650804  | 4.277455  |
| C | -3.886784 | 4.332497  | 5.440310  |
| C | -4.409795 | 2.810018  | 3.637233  |
| C | -5.187634 | 4.196731  | 5.930699  |
| H | -3.181839 | 4.992944  | 5.950953  |
| C | -5.708707 | 2.674349  | 4.127997  |
| H | -4.101625 | 2.236225  | 2.761389  |
| C | -6.105827 | 3.370829  | 5.274026  |
| H | -5.486575 | 4.742896  | 6.829156  |
| H | -6.408453 | 2.002661  | 3.625063  |
| H | -7.121455 | 3.259165  | 5.661285  |
| C | -3.123352 | -0.063326 | 5.277858  |
| C | -3.609170 | 0.737690  | 6.328133  |
| C | -3.985309 | -1.013205 | 4.700167  |

Go to: [\[table of contents\]](#) [\[references\]](#)

|   |           |           |           |
|---|-----------|-----------|-----------|
| C | -4.914104 | 0.581407  | 6.796236  |
| H | -2.970356 | 1.512471  | 6.755349  |
| C | -5.290860 | -1.171183 | 5.172757  |
| H | -3.620946 | -1.642835 | 3.884861  |
| C | -5.757907 | -0.376745 | 6.224873  |
| H | -5.279663 | 1.226463  | 7.597946  |
| H | -5.944118 | -1.920756 | 4.718985  |
| H | -6.780127 | -0.496930 | 6.592141  |
| C | 2.986936  | 0.534438  | 9.431079  |
| C | 2.096926  | 1.282901  | 10.224544 |
| C | 3.961043  | -0.254246 | 10.070410 |
| C | 2.175132  | 1.235659  | 11.618587 |
| H | 1.352632  | 1.921718  | 9.743921  |
| C | 4.033551  | -0.305835 | 11.464893 |
| H | 4.656612  | -0.841156 | 9.465691  |
| C | 3.140556  | 0.438285  | 12.243343 |
| H | 1.481888  | 1.829562  | 12.219426 |
| H | 4.790224  | -0.931363 | 11.944982 |
| H | 3.198508  | 0.399673  | 13.333926 |

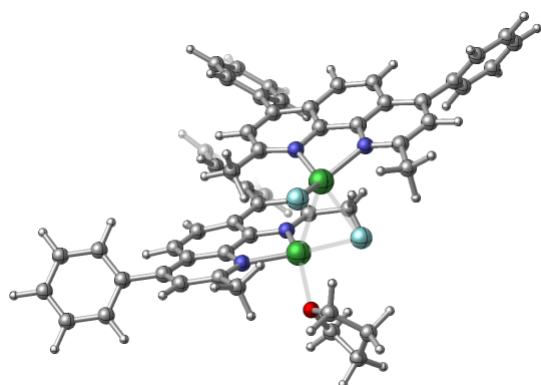

|                                              |                             |
|----------------------------------------------|-----------------------------|
| Zero-point correction=                       | 0.901478 (Hartree/Particle) |
| Thermal correction to Energy=                | 0.959827                    |
| Thermal correction to Enthalpy=              | 0.960771                    |
| Thermal correction to Gibbs Free Energy=     | 0.804246                    |
| Sum of electronic and zero-point Energies=   | -6391.425234                |
| Sum of electronic and thermal Energies=      | -6391.366886                |
| Sum of electronic and thermal Enthalpies=    | -6391.365941                |
| Sum of electronic and thermal Free Energies= | -6391.522467                |

uB3LYP-d3/def2-tzvpp-CPCM(THF)//uB3LYP-d3/def2-svp-CPCM(THF)

E(scf) = -6395.713532 a.u.

uPBE0-d3/def2-tzvpp-CPCM(THF)//uB3LYP-d3/def2-svp-CPCM(THF)

E(scf) = -6391.86343 a.u.

### **<sup>1</sup>TS1**

E(scf) = -6392.31187881 a.u.

$\nu_{\min} = -43.72 \text{ cm}^{-1}$

|   |          |          |           |
|---|----------|----------|-----------|
| C | 1.652010 | 4.388435 | -0.713710 |
| C | 1.239349 | 5.255919 | -1.725041 |



Go to: [\[table of contents\]](#) [\[references\]](#)

|    |           |           |           |
|----|-----------|-----------|-----------|
| C  | -0.071664 | 5.771662  | -1.779861 |
| N  | 0.806025  | 4.009119  | 0.272815  |
| C  | -0.961061 | 5.398313  | -0.729765 |
| C  | -0.473771 | 4.505044  | 0.260301  |
| C  | -1.313313 | 4.072918  | 1.333415  |
| N  | -0.738367 | 3.215757  | 2.227707  |
| C  | -2.656189 | 4.526851  | 1.442615  |
| C  | -3.426844 | 4.030706  | 2.532298  |
| C  | -1.457807 | 2.770780  | 3.267040  |
| C  | -2.795757 | 3.165670  | 3.436098  |
| Ni | 1.158820  | 2.766779  | 1.737951  |
| H  | 1.949259  | 5.514678  | -2.512868 |
| H  | -3.359145 | 2.761073  | 4.278537  |
| Cl | 1.433221  | 0.453449  | 1.325007  |
| Cl | 2.623750  | 2.864437  | 3.552500  |
| C  | 4.439805  | 1.050975  | 5.861328  |
| C  | 4.583203  | 1.539955  | 7.174759  |
| C  | 3.553686  | 1.434285  | 8.108351  |
| N  | 3.314969  | 0.445849  | 5.469412  |
| C  | 2.365402  | 0.757932  | 7.706733  |
| C  | 2.300865  | 0.284204  | 6.365888  |
| C  | 1.142270  | -0.426065 | 5.898161  |
| N  | 1.184128  | -0.867971 | 4.598380  |
| C  | 0.044937  | -0.654127 | 6.769968  |
| C  | -1.070520 | -1.383992 | 6.260297  |
| C  | 0.185536  | -1.679399 | 4.176230  |
| C  | -0.932696 | -1.931997 | 4.978620  |
| Ni | 2.587222  | 0.082935  | 3.566152  |
| H  | 5.509432  | 2.048148  | 7.447907  |
| H  | -1.736202 | -2.546930 | 4.568647  |
| C  | 5.522890  | 1.250519  | 4.844239  |
| H  | 5.663765  | 0.339407  | 4.248439  |
| H  | 5.202638  | 2.038750  | 4.144084  |
| H  | 6.470294  | 1.548585  | 5.313017  |
| C  | 0.307123  | -2.296515 | 2.814444  |
| H  | 0.028660  | -1.578203 | 2.029690  |
| H  | 1.355648  | -2.572619 | 2.624106  |
| H  | -0.327580 | -3.189537 | 2.726346  |
| C  | -0.762812 | 1.843067  | 4.216574  |
| H  | -0.250410 | 1.050548  | 3.653540  |
| H  | 0.038146  | 2.380300  | 4.748805  |
| H  | -1.450825 | 1.394655  | 4.944815  |
| C  | 3.032569  | 3.803365  | -0.642054 |
| H  | 3.505486  | 4.080970  | 0.315871  |
| H  | 2.968618  | 2.701756  | -0.644640 |
| H  | 3.673711  | 4.131682  | -1.470675 |

Go to: [\[table of contents\]](#) [\[references\]](#)

|   |           |           |           |
|---|-----------|-----------|-----------|
| O | 4.323417  | -0.192944 | 2.372916  |
| C | 4.331418  | -1.462783 | 1.684477  |
| C | 4.778809  | 0.860817  | 1.485418  |
| C | 5.175686  | -1.235624 | 0.434797  |
| H | 4.729142  | -2.222773 | 2.373356  |
| H | 3.292879  | -1.719884 | 1.419762  |
| C | 4.837891  | 0.224073  | 0.102078  |
| H | 4.072027  | 1.694804  | 1.568401  |
| H | 5.773023  | 1.191510  | 1.830333  |
| H | 4.924792  | -1.940181 | -0.371586 |
| H | 6.248310  | -1.343296 | 0.665835  |
| H | 3.845248  | 0.282957  | -0.370079 |
| H | 5.575090  | 0.709306  | -0.554009 |
| C | -2.300519 | 5.900466  | -0.556505 |
| H | -2.674552 | 6.650304  | -1.253814 |
| C | -3.104977 | 5.488433  | 0.471669  |
| H | -4.102854 | 5.915754  | 0.572453  |
| C | 1.257921  | 0.477147  | 8.575323  |
| H | 1.313849  | 0.780725  | 9.620620  |
| C | 0.153432  | -0.192042 | 8.126740  |
| H | -0.656220 | -0.412567 | 8.822577  |
| C | -0.462144 | 6.657783  | -2.902696 |
| C | -1.640613 | 6.434418  | -3.644122 |
| C | 0.372367  | 7.726337  | -3.288987 |
| C | -1.977406 | 7.257282  | -4.721583 |
| H | -2.285526 | 5.591381  | -3.386867 |
| C | 0.034207  | 8.549557  | -4.365619 |
| H | 1.287273  | 7.921532  | -2.724208 |
| C | -1.143678 | 8.320602  | -5.085859 |
| H | -2.892659 | 7.060378  | -5.285878 |
| H | 0.692090  | 9.378199  | -4.640307 |
| H | -1.408596 | 8.964627  | -5.928105 |
| C | -4.853242 | 4.389614  | 2.742299  |
| C | -5.292491 | 4.830594  | 4.005218  |
| C | -5.802618 | 4.254328  | 1.710960  |
| C | -6.636513 | 5.141202  | 4.226217  |
| H | -4.567329 | 4.945074  | 4.814526  |
| C | -7.147469 | 4.559983  | 1.934668  |
| H | -5.485853 | 3.885808  | 0.732872  |
| C | -7.568935 | 5.007944  | 3.191476  |
| H | -6.956309 | 5.491847  | 5.210764  |
| H | -7.870842 | 4.441215  | 1.124033  |
| H | -8.620633 | 5.249328  | 3.364613  |
| C | -2.327833 | -1.583256 | 7.019746  |
| C | -2.992584 | -0.496726 | 7.624382  |
| C | -2.920867 | -2.858459 | 7.105830  |

Go to: [\[table of contents\]](#) [\[references\]](#)

|   |           |           |           |
|---|-----------|-----------|-----------|
| C | -4.202315 | -0.681779 | 8.297693  |
| H | -2.565285 | 0.505508  | 7.544693  |
| C | -4.129148 | -3.043037 | 7.782190  |
| H | -2.417664 | -3.715130 | 6.650951  |
| C | -4.774932 | -1.956021 | 8.382102  |
| H | -4.704509 | 0.176155  | 8.752095  |
| H | -4.566573 | -4.042796 | 7.844926  |
| H | -5.720546 | -2.100595 | 8.910493  |
| C | 3.731527  | 2.019118  | 9.463335  |
| C | 2.790008  | 2.918388  | 9.998982  |
| C | 4.880684  | 1.718493  | 10.217873 |
| C | 2.989703  | 3.493142  | 11.256655 |
| H | 1.905643  | 3.182832  | 9.415047  |
| C | 5.076010  | 2.288861  | 11.478386 |
| H | 5.618003  | 1.019488  | 9.815719  |
| C | 4.130995  | 3.177672  | 12.002274 |
| H | 2.252350  | 4.195506  | 11.653394 |
| H | 5.969587  | 2.035955  | 12.054598 |
| H | 4.284573  | 3.625431  | 12.987268 |

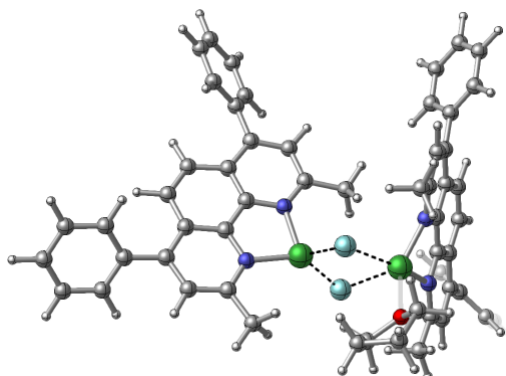

|                                              |                             |
|----------------------------------------------|-----------------------------|
| Zero-point correction=                       | 0.899826 (Hartree/Particle) |
| Thermal correction to Energy=                | 0.957880                    |
| Thermal correction to Enthalpy=              | 0.958824                    |
| Thermal correction to Gibbs Free Energy=     | 0.801954                    |
| Sum of electronic and zero-point Energies=   | -6391.412052                |
| Sum of electronic and thermal Energies=      | -6391.353999                |
| Sum of electronic and thermal Enthalpies=    | -6391.353055                |
| Sum of electronic and thermal Free Energies= | -6391.509924                |

uB3LYP-d3/def2-tzvpp-CPCM(THF)//uB3LYP-d3/def2-svp-CPCM(THF)

E(scf) = -6395.698063 a.u.

uPBE0-d3/def2-tzvpp-CPCM(THF)//uB3LYP-d3/def2-svp-CPCM(THF)

E(scf) = -6391.850749 a.u.

### <sup>3</sup>TS1

E(scf) = -6392.31198339 a.u.

$\nu_{\min} = -45.94 \text{ cm}^{-1}$

|   |           |          |           |
|---|-----------|----------|-----------|
| C | 1.653828  | 4.390680 | -0.710912 |
| C | 1.240827  | 5.257004 | -1.723036 |
| C | -0.070713 | 5.771410 | -1.778920 |

Go to: [\[table of contents\]](#) [\[references\]](#)

|    |           |           |           |
|----|-----------|-----------|-----------|
| N  | 0.807735  | 4.011241  | 0.275554  |
| C  | -0.960269 | 5.397884  | -0.729024 |
| C  | -0.472603 | 4.505819  | 0.261968  |
| C  | -1.312359 | 4.073609  | 1.334868  |
| N  | -0.737178 | 3.217523  | 2.230042  |
| C  | -2.655778 | 4.526310  | 1.443035  |
| C  | -3.426532 | 4.030184  | 2.532621  |
| C  | -1.456758 | 2.772546  | 3.269258  |
| C  | -2.795140 | 3.166355  | 3.437380  |
| Ni | 1.160591  | 2.769536  | 1.741483  |
| H  | 1.950906  | 5.515959  | -2.510646 |
| H  | -3.358595 | 2.761832  | 4.279807  |
| Cl | 1.432050  | 0.456398  | 1.330201  |
| Cl | 2.625580  | 2.868180  | 3.554943  |
| C  | 4.439953  | 1.049771  | 5.860799  |
| C  | 4.583736  | 1.538428  | 7.174308  |
| C  | 3.554340  | 1.432959  | 8.108042  |
| N  | 3.314847  | 0.445115  | 5.468905  |
| C  | 2.365782  | 0.757048  | 7.706496  |
| C  | 2.300866  | 0.283551  | 6.365583  |
| C  | 1.141962  | -0.426273 | 5.897980  |
| N  | 1.183440  | -0.867995 | 4.598123  |
| C  | 0.044614  | -0.653913 | 6.769877  |
| C  | -1.071369 | -1.382952 | 6.260158  |
| C  | 0.184174  | -1.678494 | 4.175790  |
| C  | -0.934108 | -1.930595 | 4.978267  |
| Ni | 2.586939  | 0.082094  | 3.565951  |
| H  | 5.510192  | 2.046238  | 7.447396  |
| H  | -1.738113 | -2.544815 | 4.568195  |
| C  | 5.523018  | 1.249185  | 4.843674  |
| H  | 5.663178  | 0.338349  | 4.247297  |
| H  | 5.203214  | 2.038117  | 4.144105  |
| H  | 6.470691  | 1.546306  | 5.312512  |
| C  | 0.304815  | -2.295249 | 2.813695  |
| H  | 0.023360  | -1.577559 | 2.029442  |
| H  | 1.353521  | -2.569271 | 2.621531  |
| H  | -0.328301 | -3.189518 | 2.726657  |
| C  | -0.761467 | 1.845864  | 4.219600  |
| H  | -0.250201 | 1.052128  | 3.657252  |
| H  | 0.040391  | 2.383387  | 4.750158  |
| H  | -1.449102 | 1.398975  | 4.949127  |
| C  | 3.034874  | 3.806917  | -0.638291 |
| H  | 3.506547  | 4.084239  | 0.320334  |
| H  | 2.972005  | 2.705235  | -0.641796 |
| H  | 3.676514  | 4.136406  | -1.466060 |
| O  | 4.322720  | -0.192732 | 2.372030  |

Go to: [\[table of contents\]](#) [\[references\]](#)

|   |           |           |           |
|---|-----------|-----------|-----------|
| C | 4.330321  | -1.461812 | 1.682140  |
| C | 4.777736  | 0.861984  | 1.485470  |
| C | 5.173254  | -1.233107 | 0.431832  |
| H | 4.728884  | -2.222514 | 2.369746  |
| H | 3.291580  | -1.718869 | 1.418207  |
| C | 4.835102  | 0.226994  | 0.101275  |
| H | 4.071486  | 1.696243  | 1.570280  |
| H | 5.772477  | 1.191736  | 1.829763  |
| H | 4.921489  | -1.936687 | -0.375128 |
| H | 6.246131  | -1.341041 | 0.661560  |
| H | 3.841889  | 0.286498  | -0.369624 |
| H | 5.571510  | 0.713024  | -0.555106 |
| C | -2.300316 | 5.898846  | -0.556822 |
| H | -2.674694 | 6.647830  | -1.254863 |
| C | -3.104957 | 5.486780  | 0.471197  |
| H | -4.103297 | 5.913217  | 0.571125  |
| C | 1.258360  | 0.476511  | 8.575233  |
| H | 1.314590  | 0.779886  | 9.620573  |
| C | 0.153523  | -0.192152 | 8.126718  |
| H | -0.656116 | -0.412453 | 8.822640  |
| C | -0.461452 | 6.656380  | -2.902557 |
| C | -1.639391 | 6.431498  | -3.644383 |
| C | 0.372314  | 7.725383  | -3.289250 |
| C | -1.976402 | 7.253317  | -4.722572 |
| H | -2.283700 | 5.588085  | -3.386848 |
| C | 0.033945  | 8.547551  | -4.366617 |
| H | 1.286795  | 7.921772  | -2.724196 |
| C | -1.143422 | 8.317095  | -5.087230 |
| H | -2.891232 | 7.055230  | -5.287140 |
| H | 0.691249  | 9.376559  | -4.641589 |
| H | -1.408510 | 8.960301  | -5.930048 |
| C | -4.853383 | 4.387889  | 2.741616  |
| C | -5.293715 | 4.829328  | 4.003997  |
| C | -5.802085 | 4.250978  | 1.709873  |
| C | -6.638147 | 5.138814  | 4.224071  |
| H | -4.569089 | 4.945053  | 4.813608  |
| C | -7.147344 | 4.555510  | 1.932661  |
| H | -5.484449 | 3.882076  | 0.732213  |
| C | -7.569896 | 5.003949  | 3.188933  |
| H | -6.958795 | 5.489840  | 5.208206  |
| H | -7.870177 | 4.435488  | 1.121729  |
| H | -8.621915 | 5.244452  | 3.361347  |
| C | -2.328698 | -1.581651 | 7.019723  |
| C | -2.992707 | -0.494883 | 7.624751  |
| C | -2.922512 | -2.856512 | 7.105518  |
| C | -4.202464 | -0.679382 | 8.298166  |

Go to: [\[table of contents\]](#) [\[references\]](#)

|   |           |           |           |
|---|-----------|-----------|-----------|
| H | -2.564816 | 0.507117  | 7.545267  |
| C | -4.130819 | -3.040538 | 7.781982  |
| H | -2.419897 | -3.713361 | 6.650325  |
| C | -4.775854 | -1.953296 | 8.382290  |
| H | -4.704074 | 0.178734  | 8.752870  |
| H | -4.568853 | -4.040045 | 7.844489  |
| H | -5.721488 | -2.097437 | 8.910765  |
| C | 3.732578  | 2.017535  | 9.463083  |
| C | 2.791439  | 2.917046  | 9.998992  |
| C | 4.881751  | 1.716431  | 10.217404 |
| C | 2.991516  | 3.491568  | 11.256710 |
| H | 1.907074  | 3.181859  | 9.415225  |
| C | 5.077458  | 2.286568  | 11.477963 |
| H | 5.618779  | 1.017238  | 9.815044  |
| C | 4.132817  | 3.175622  | 12.002113 |
| H | 2.254456  | 4.194125  | 11.653654 |
| H | 5.971040  | 2.033291  | 12.054005 |
| H | 4.286695  | 3.623201  | 12.987142 |

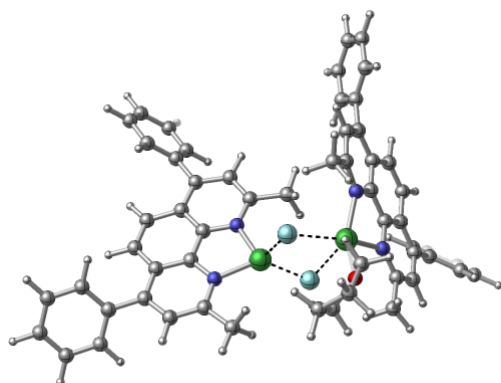

Zero-point correction= 0.899827 (Hartree/Particle)  
Thermal correction to Energy= 0.957880  
Thermal correction to Enthalpy= 0.958824  
Thermal correction to Gibbs Free Energy= 0.800889  
Sum of electronic and zero-point Energies= -6391.412156  
Sum of electronic and thermal Energies= -6391.354104  
Sum of electronic and thermal Enthalpies= -6391.353160  
Sum of electronic and thermal Free Energies= -6391.511094

uB3LYP-d3/def2-tzvpp-CPCM(THF)//uB3LYP-d3/def2-svp-CPCM(THF)

E(scf) = -6395.698187 a.u.

uPBE0-d3/def2-tzvpp-CPCM(THF)//uB3LYP-d3/def2-svp-CPCM(THF)

E(scf) = -6391.850882 a.u.

### **<sup>1</sup>Int2**

E(scf) = -6392.31201368 a.u.

$\nu_{\min} = 7.20 \text{ cm}^{-1}$

|   |           |          |           |
|---|-----------|----------|-----------|
| C | 1.594413  | 4.301028 | -0.782392 |
| C | 1.193632  | 5.178465 | -1.791074 |
| C | -0.101907 | 5.730951 | -1.829553 |

Go to: [\[table of contents\]](#) [\[references\]](#)

|    |           |           |           |
|----|-----------|-----------|-----------|
| N  | 0.749603  | 3.947906  | 0.213237  |
| C  | -0.989253 | 5.384055  | -0.768382 |
| C  | -0.514992 | 4.478085  | 0.215886  |
| C  | -1.352831 | 4.066578  | 1.298902  |
| N  | -0.790422 | 3.191055  | 2.183522  |
| C  | -2.680973 | 4.556694  | 1.423418  |
| C  | -3.452902 | 4.079218  | 2.520893  |
| C  | -1.511693 | 2.761114  | 3.228382  |
| C  | -2.836070 | 3.193312  | 3.413657  |
| Ni | 1.089205  | 2.701126  | 1.673239  |
| H  | 1.900246  | 5.415269  | -2.588690 |
| H  | -3.401299 | 2.801175  | 4.260759  |
| Cl | 1.494191  | 0.417476  | 1.236243  |
| Cl | 2.536918  | 2.771524  | 3.523995  |
| C  | 4.451074  | 1.107353  | 5.907309  |
| C  | 4.593738  | 1.564939  | 7.231501  |
| C  | 3.567682  | 1.422387  | 8.165703  |
| N  | 3.334125  | 0.494147  | 5.505399  |
| C  | 2.385842  | 0.744780  | 7.751020  |
| C  | 2.322036  | 0.299714  | 6.398748  |
| C  | 1.169765  | -0.406310 | 5.914033  |
| N  | 1.213122  | -0.820260 | 4.601539  |
| C  | 0.073036  | -0.658712 | 6.781246  |
| C  | -1.038936 | -1.385257 | 6.260241  |
| C  | 0.220398  | -1.640849 | 4.171598  |
| C  | -0.892902 | -1.915431 | 4.969536  |
| Ni | 2.596275  | 0.183115  | 3.585753  |
| H  | 5.513876  | 2.078700  | 7.514416  |
| H  | -1.688265 | -2.535483 | 4.551321  |
| C  | 5.526013  | 1.348968  | 4.889707  |
| H  | 5.715263  | 0.439069  | 4.305092  |
| H  | 5.170041  | 2.110191  | 4.177208  |
| H  | 6.456098  | 1.698996  | 5.356970  |
| C  | 0.346491  | -2.247089 | 2.805439  |
| H  | 0.035110  | -1.538265 | 2.024516  |
| H  | 1.400990  | -2.486570 | 2.600704  |
| H  | -0.259104 | -3.160806 | 2.722573  |
| C  | -0.834551 | 1.810009  | 4.167984  |
| H  | -0.311154 | 1.030644  | 3.597078  |
| H  | -0.045762 | 2.333943  | 4.730761  |
| H  | -1.536330 | 1.344358  | 4.872066  |
| C  | 2.958755  | 3.678160  | -0.721656 |
| H  | 3.468940  | 3.988040  | 0.206798  |
| H  | 2.859916  | 2.580692  | -0.665697 |
| H  | 3.584710  | 3.947103  | -1.582662 |
| O  | 4.355300  | -0.108693 | 2.429534  |

Go to: [\[table of contents\]](#) [\[references\]](#)

|   |           |           |           |
|---|-----------|-----------|-----------|
| C | 4.422133  | -1.408654 | 1.804539  |
| C | 4.806735  | 0.915678  | 1.507404  |
| C | 5.314915  | -1.217977 | 0.583073  |
| H | 4.807203  | -2.124353 | 2.546005  |
| H | 3.402227  | -1.704075 | 1.508846  |
| C | 4.951016  | 0.212539  | 0.162559  |
| H | 4.062928  | 1.720988  | 1.514500  |
| H | 5.770042  | 1.305875  | 1.876712  |
| H | 5.120812  | -1.968572 | -0.197007 |
| H | 6.378492  | -1.281557 | 0.866459  |
| H | 3.981054  | 0.217031  | -0.357909 |
| H | 5.704309  | 0.687741  | -0.482482 |
| C | -2.312227 | 5.922492  | -0.579405 |
| H | -2.674297 | 6.682330  | -1.272195 |
| C | -3.114698 | 5.531515  | 0.458551  |
| H | -4.099370 | 5.985479  | 0.571752  |
| C | 1.281965  | 0.435821  | 8.613814  |
| H | 1.336680  | 0.713613  | 9.666320  |
| C | 0.181324  | -0.228328 | 8.148672  |
| H | -0.626265 | -0.470814 | 8.839635  |
| C | -0.481805 | 6.626445  | -2.948946 |
| C | -1.673347 | 6.431972  | -3.677140 |
| C | 0.375296  | 7.673218  | -3.344548 |
| C | -2.000599 | 7.262090  | -4.751983 |
| H | -2.336545 | 5.605809  | -3.411755 |
| C | 0.046500  | 8.503919  | -4.418375 |
| H | 1.300786  | 7.845447  | -2.789630 |
| C | -1.144199 | 8.303776  | -5.125937 |
| H | -2.926380 | 7.087900  | -5.306443 |
| H | 0.721962  | 9.315584  | -4.700889 |
| H | -1.401672 | 8.953545  | -5.966073 |
| C | -4.865932 | 4.477912  | 2.748612  |
| C | -5.276836 | 4.929810  | 4.017155  |
| C | -5.831137 | 4.370993  | 1.728729  |
| C | -6.608613 | 5.278651  | 4.254697  |
| H | -4.538867 | 5.022527  | 4.817625  |
| C | -7.163850 | 4.714770  | 1.969070  |
| H | -5.536998 | 3.994743  | 0.746524  |
| C | -7.556933 | 5.173257  | 3.231272  |
| H | -6.906243 | 5.637252  | 5.243311  |
| H | -7.900151 | 4.617687  | 1.167242  |
| H | -8.599083 | 5.444546  | 3.417364  |
| C | -2.295621 | -1.603729 | 7.013770  |
| C | -2.960941 | -0.533630 | 7.647603  |
| C | -2.890957 | -2.880303 | 7.066569  |
| C | -4.170468 | -0.735660 | 8.316277  |



Go to: [\[table of contents\]](#) [\[references\]](#)

|   |           |           |           |
|---|-----------|-----------|-----------|
| H | -2.533821 | 0.470389  | 7.593901  |
| C | -4.099453 | -3.081839 | 7.737495  |
| H | -2.388708 | -3.725644 | 6.589950  |
| C | -4.744653 | -2.011067 | 8.366791  |
| H | -4.671824 | 0.110445  | 8.793368  |
| H | -4.537501 | -4.082709 | 7.773399  |
| H | -5.690372 | -2.168975 | 8.891184  |
| C | 3.744415  | 1.974594  | 9.534577  |
| C | 2.796298  | 2.850544  | 10.096668 |
| C | 4.899396  | 1.666479  | 10.277234 |
| C | 2.994844  | 3.394510  | 11.368167 |
| H | 1.907263  | 3.121242  | 9.522814  |
| C | 5.093761  | 2.205971  | 11.551422 |
| H | 5.642233  | 0.985677  | 9.854514  |
| C | 4.141888  | 3.071338  | 12.101543 |
| H | 2.251994  | 4.078978  | 11.785442 |
| H | 5.991997  | 1.947283  | 12.117769 |
| H | 4.294632  | 3.494977  | 13.097284 |

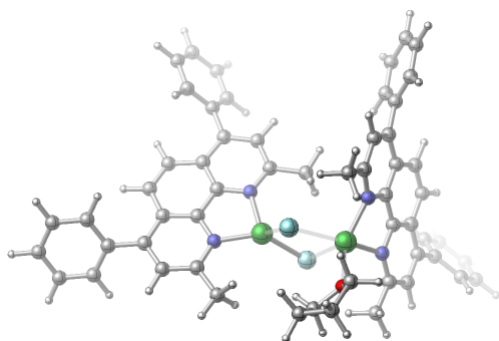

|                                              |                             |
|----------------------------------------------|-----------------------------|
| Zero-point correction=                       | 0.899827 (Hartree/Particle) |
| Thermal correction to Energy=                | 0.958684                    |
| Thermal correction to Enthalpy=              | 0.959629                    |
| Thermal correction to Gibbs Free Energy=     | 0.800461                    |
| Sum of electronic and zero-point Energies=   | -6391.412187                |
| Sum of electronic and thermal Energies=      | -6391.353329                |
| Sum of electronic and thermal Enthalpies=    | -6391.352385                |
| Sum of electronic and thermal Free Energies= | -6391.511553                |

uB3LYP-d3/def2-tzvpp-CPCM(THF)//uB3LYP-d3/def2-svp-CPCM(THF)

E(scf) = -6395.697015 a.u.

uPBE0-d3/def2-tzvpp-CPCM(THF)//uB3LYP-d3/def2-svp-CPCM(THF)

E(scf) = -6391.850176 a.u.

### <sup>3</sup>Int2

E(scf) = -6392.31213725 a.u.

$\nu_{\min} = 7.23 \text{ cm}^{-1}$

|   |           |          |           |
|---|-----------|----------|-----------|
| C | 1.593618  | 4.301239 | -0.782393 |
| C | 1.193251  | 5.177921 | -1.791885 |
| C | -0.102319 | 5.730235 | -1.831374 |
| N | 0.748365  | 3.948812 | 0.213112  |
| C | -0.990218 | 5.383864 | -0.770469 |

Go to: [\[table of contents\]](#) [\[references\]](#)

|    |           |           |           |
|----|-----------|-----------|-----------|
| C  | -0.516353 | 4.478605  | 0.214642  |
| C  | -1.354871 | 4.067427  | 1.297293  |
| N  | -0.792997 | 3.192275  | 2.182612  |
| C  | -2.683224 | 4.557325  | 1.420622  |
| C  | -3.455867 | 4.080106  | 2.517693  |
| C  | -1.515032 | 2.762405  | 3.226960  |
| C  | -2.839595 | 3.194549  | 3.411160  |
| Ni | 1.086941  | 2.702234  | 1.673620  |
| H  | 1.900237  | 5.414258  | -2.589310 |
| H  | -3.405409 | 2.802564  | 4.257938  |
| Cl | 1.493712  | 0.419671  | 1.237975  |
| Cl | 2.532730  | 2.769670  | 3.525645  |
| C  | 4.452068  | 1.107904  | 5.908225  |
| C  | 4.596067  | 1.563105  | 7.233036  |
| C  | 3.570811  | 1.418963  | 8.167989  |
| N  | 3.334801  | 0.495222  | 5.506269  |
| C  | 2.388568  | 0.742278  | 7.753240  |
| C  | 2.323378  | 0.299281  | 6.400234  |
| C  | 1.170520  | -0.405433 | 5.915340  |
| N  | 1.212443  | -0.817360 | 4.601947  |
| C  | 0.074265  | -0.658514 | 6.783082  |
| C  | -1.038671 | -1.383503 | 6.262063  |
| C  | 0.218608  | -1.636812 | 4.171829  |
| C  | -0.893934 | -1.911984 | 4.970348  |
| Ni | 2.595224  | 0.187329  | 3.586499  |
| H  | 5.516462  | 2.076392  | 7.515957  |
| H  | -1.689905 | -2.531162 | 4.551983  |
| C  | 5.526037  | 1.351659  | 4.890075  |
| H  | 5.716666  | 0.442264  | 4.305115  |
| H  | 5.168446  | 2.112436  | 4.177916  |
| H  | 6.455755  | 1.703146  | 5.356965  |
| C  | 0.342414  | -2.241460 | 2.804673  |
| H  | 0.024304  | -1.533927 | 2.025307  |
| H  | 1.397140  | -2.475733 | 2.595502  |
| H  | -0.259257 | -3.157973 | 2.723724  |
| C  | -0.838633 | 1.811377  | 4.167216  |
| H  | -0.314625 | 1.032075  | 3.596808  |
| H  | -0.050551 | 2.335448  | 4.730828  |
| H  | -1.541044 | 1.345582  | 4.870578  |
| C  | 2.957853  | 3.678332  | -0.720573 |
| H  | 3.467705  | 3.988940  | 0.207825  |
| H  | 2.858763  | 2.580923  | -0.663704 |
| H  | 3.584204  | 3.946450  | -1.581548 |
| O  | 4.354347  | -0.103851 | 2.430684  |
| C  | 4.423734  | -1.404447 | 1.807259  |
| C  | 4.805100  | 0.920136  | 1.507858  |

Go to: [\[table of contents\]](#) [\[references\]](#)

|   |           |           |           |
|---|-----------|-----------|-----------|
| C | 5.316906  | -1.213692 | 0.586082  |
| H | 4.809565  | -2.118631 | 2.549789  |
| H | 3.404510  | -1.701967 | 1.511340  |
| C | 4.951041  | 0.215810  | 0.163837  |
| H | 4.060278  | 1.724501  | 1.513641  |
| H | 5.767693  | 1.311907  | 1.877353  |
| H | 5.124389  | -1.965431 | -0.193282 |
| H | 6.380421  | -1.275322 | 0.870119  |
| H | 3.981306  | 0.218305  | -0.357084 |
| H | 5.703898  | 0.691464  | -0.481374 |
| C | -2.313409 | 5.922158  | -0.582631 |
| H | -2.675179 | 6.681534  | -1.276083 |
| C | -3.116483 | 5.531592  | 0.455015  |
| H | -4.101318 | 5.985418  | 0.567333  |
| C | 1.285410  | 0.432246  | 8.616515  |
| H | 1.341189  | 0.708154  | 9.669461  |
| C | 0.184073  | -0.230584 | 8.151164  |
| H | -0.622989 | -0.473928 | 8.842442  |
| C | -0.481750 | 6.624933  | -2.951564 |
| C | -1.672844 | 6.429765  | -3.680303 |
| C | 0.375405  | 7.671579  | -3.347383 |
| C | -1.999615 | 7.259093  | -4.755900 |
| H | -2.336059 | 5.603676  | -3.414735 |
| C | 0.047085  | 8.501494  | -4.421963 |
| H | 1.300551  | 7.844334  | -2.792057 |
| C | -1.143173 | 8.300669  | -5.130071 |
| H | -2.925048 | 7.084371  | -5.310772 |
| H | 0.722572  | 9.313081  | -4.704643 |
| H | -1.400275 | 8.949821  | -5.970796 |
| C | -4.869131 | 4.478655  | 2.744241  |
| C | -5.280986 | 4.931046  | 4.012293  |
| C | -5.833592 | 4.371086  | 1.723731  |
| C | -6.612990 | 5.279762  | 4.248745  |
| H | -4.543590 | 5.024246  | 4.813237  |
| C | -7.166536 | 4.714724  | 1.962991  |
| H | -5.538697 | 3.994444  | 0.741904  |
| C | -7.560574 | 5.173722  | 3.224708  |
| H | -6.911375 | 5.638757  | 5.236987  |
| H | -7.902263 | 4.617139  | 1.160696  |
| H | -8.602903 | 5.444907  | 3.409951  |
| C | -2.294814 | -1.602362 | 7.016277  |
| C | -2.958628 | -0.533037 | 7.653064  |
| C | -2.891387 | -2.878490 | 7.066931  |
| C | -4.167687 | -0.735382 | 8.322478  |
| H | -2.530695 | 0.470725  | 7.601049  |
| C | -4.099437 | -3.080340 | 7.738551  |

Go to: [\[table of contents\]](#) [\[references\]](#)

|   |           |           |           |
|---|-----------|-----------|-----------|
| H | -2.390405 | -3.723311 | 6.588064  |
| C | -4.743052 | -2.010349 | 8.370809  |
| H | -4.667792 | 0.110176  | 8.801855  |
| H | -4.538378 | -4.080885 | 7.772704  |
| H | -5.688418 | -2.168504 | 8.895765  |
| C | 3.748919  | 1.968847  | 9.537622  |
| C | 2.801456  | 2.843948  | 10.102147 |
| C | 4.904622  | 1.659422  | 10.278623 |
| C | 3.001302  | 3.385749  | 11.374367 |
| H | 1.911884  | 3.115701  | 9.529627  |
| C | 5.100302  | 2.196753  | 11.553522 |
| H | 5.646995  | 0.979286  | 9.854015  |
| C | 4.149044  | 3.061258  | 12.106062 |
| H | 2.258917  | 4.069571  | 11.793528 |
| H | 5.999087  | 1.937047  | 12.118534 |
| H | 4.302813  | 3.483208  | 13.102363 |

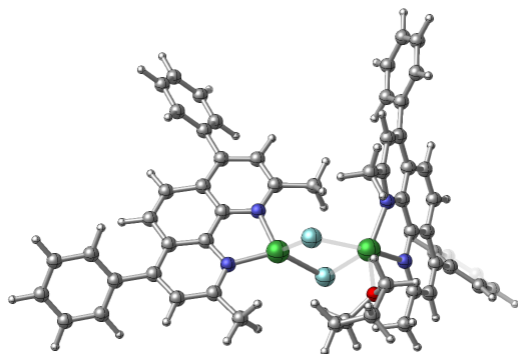

|                                              |                             |
|----------------------------------------------|-----------------------------|
| Zero-point correction=                       | 0.899838 (Hartree/Particle) |
| Thermal correction to Energy=                | 0.958679                    |
| Thermal correction to Enthalpy=              | 0.959623                    |
| Thermal correction to Gibbs Free Energy=     | 0.799521                    |
| Sum of electronic and zero-point Energies=   | -6391.412299                |
| Sum of electronic and thermal Energies=      | -6391.353458                |
| Sum of electronic and thermal Enthalpies=    | -6391.352514                |
| Sum of electronic and thermal Free Energies= | -6391.512616                |

uB3LYP-d3/def2-tzvpp-CPCM(THF)//uB3LYP-d3/def2-svp-CPCM(THF)

E(scf) = -6395.697091 a.u.

uPBE0-d3/def2-tzvpp-CPCM(THF)//uB3LYP-d3/def2-svp-CPCM(THF)

E(scf) = -6391.850302 a.u.

**<sup>1</sup>[(L4)NiCl]<sub>2</sub>**

E(scf) = -6160.00149650 a.u.

n<sub>min</sub> = 7.08 cm<sup>-1</sup>

|    |           |          |           |
|----|-----------|----------|-----------|
| Ni | 15.907727 | 7.659116 | 6.340609  |
| N  | 17.224805 | 6.136083 | 6.246963  |
| N  | 16.192984 | 7.445491 | 8.265972  |
| C  | 17.062499 | 6.434996 | 8.590283  |
| C  | 17.622651 | 5.720838 | 7.483822  |
| C  | 18.407059 | 5.066605 | 10.101566 |

Go to: [\[table of contents\]](#) [\[references\]](#)

|    |           |           |           |
|----|-----------|-----------|-----------|
| H  | 18.755566 | 4.842544  | 11.109783 |
| C  | 18.545979 | 4.660353  | 7.690242  |
| C  | 18.941317 | 4.382033  | 9.044143  |
| H  | 19.703603 | 3.624716  | 9.227541  |
| C  | 15.957390 | 7.893946  | 10.609463 |
| H  | 15.478156 | 8.492600  | 11.386218 |
| C  | 17.419335 | 6.099008  | 9.922686  |
| C  | 16.819568 | 6.846908  | 10.978731 |
| C  | 17.727745 | 5.533455  | 5.162016  |
| C  | 15.659341 | 8.173113  | 9.273840  |
| C  | 18.634172 | 4.465731  | 5.283850  |
| H  | 18.998235 | 3.980223  | 4.377017  |
| C  | 19.047608 | 3.995026  | 6.534652  |
| C  | 14.728519 | 9.271936  | 8.860199  |
| H  | 15.249286 | 9.956742  | 8.171042  |
| H  | 14.342145 | 9.842452  | 9.714868  |
| H  | 13.881474 | 8.848966  | 8.295502  |
| C  | 17.259583 | 6.048801  | 3.835732  |
| H  | 17.430067 | 7.134964  | 3.785465  |
| H  | 16.169202 | 5.917810  | 3.753729  |
| H  | 17.758364 | 5.552438  | 2.993220  |
| Cl | 16.531313 | 9.548637  | 4.970365  |
| Cl | 13.993379 | 7.184246  | 4.954751  |
| N  | 14.422396 | 9.363946  | 1.657679  |
| N  | 13.177624 | 10.476438 | 3.675465  |
| C  | 12.779452 | 10.888466 | 2.437612  |
| C  | 13.456810 | 10.282788 | 1.331924  |
| C  | 11.505978 | 12.266861 | 0.874006  |
| H  | 10.790314 | 13.067918 | 0.688565  |
| C  | 13.132645 | 10.647016 | -0.001433 |
| C  | 12.153816 | 11.687426 | -0.182761 |
| H  | 11.942814 | 12.039428 | -1.192594 |
| C  | 11.594003 | 11.984267 | 4.636058  |
| H  | 11.134664 | 12.381858 | 5.542451  |
| C  | 11.770536 | 11.867599 | 2.229458  |
| C  | 11.141233 | 12.414840 | 3.384488  |
| C  | 15.118311 | 8.788890  | 0.650051  |
| C  | 12.608773 | 11.019159 | 4.759487  |
| C  | 14.846565 | 9.090279  | -0.686344 |
| H  | 15.416250 | 8.575924  | -1.462423 |
| C  | 13.841266 | 10.000260 | -1.056895 |
| C  | 13.101999 | 10.530253 | 6.086597  |
| H  | 12.627948 | 11.051627 | 6.928258  |
| H  | 14.194706 | 10.652264 | 6.137623  |
| H  | 12.922164 | 9.446952  | 6.168755  |
| C  | 16.173885 | 7.809520  | 1.064463  |

Go to: [\[table of contents\]](#) [\[references\]](#)

|    |           |           |           |
|----|-----------|-----------|-----------|
| H  | 16.879869 | 8.298933  | 1.755404  |
| H  | 16.727650 | 7.398451  | 0.210308  |
| H  | 15.712893 | 6.981757  | 1.627759  |
| Ni | 14.616538 | 9.068487  | 3.584133  |
| C  | 13.568145 | 10.245303 | -2.493975 |
| C  | 14.630548 | 10.489698 | -3.387161 |
| C  | 12.259329 | 10.191643 | -3.014893 |
| C  | 14.392006 | 10.687730 | -4.749183 |
| H  | 15.651964 | 10.541813 | -3.002372 |
| C  | 12.021959 | 10.387714 | -4.377517 |
| H  | 11.423686 | 9.970031  | -2.347468 |
| C  | 13.086327 | 10.639697 | -5.250398 |
| H  | 15.230422 | 10.885521 | -5.422021 |
| H  | 10.999707 | 10.334473 | -4.760802 |
| H  | 12.899461 | 10.794410 | -6.315965 |
| C  | 10.041814 | 13.411344 | 3.307054  |
| C  | 10.105767 | 14.595711 | 4.065045  |
| C  | 8.898842  | 13.178014 | 2.518416  |
| C  | 9.064480  | 15.526290 | 4.024236  |
| H  | 10.988640 | 14.792995 | 4.677864  |
| C  | 7.855370  | 14.106340 | 2.483659  |
| H  | 8.820313  | 12.251707 | 1.945106  |
| C  | 7.935936  | 15.285231 | 3.233058  |
| H  | 9.136474  | 16.445347 | 4.611258  |
| H  | 6.972407  | 13.904514 | 1.872061  |
| H  | 7.120675  | 16.012339 | 3.202502  |
| C  | 19.979819 | 2.840510  | 6.610747  |
| C  | 21.158346 | 2.830684  | 5.841039  |
| C  | 19.688846 | 1.718157  | 7.409884  |
| C  | 22.027696 | 1.737715  | 5.880569  |
| H  | 21.400270 | 3.696449  | 5.219892  |
| C  | 20.555898 | 0.623202  | 7.443595  |
| H  | 18.765216 | 1.696726  | 7.992394  |
| C  | 21.729952 | 0.630414  | 6.682400  |
| H  | 22.943394 | 1.752553  | 5.284160  |
| H  | 20.309581 | -0.242454 | 8.063575  |
| H  | 22.409068 | -0.225259 | 6.712058  |
| C  | 17.065996 | 6.573039  | 12.415514 |
| C  | 16.948891 | 5.273624  | 12.949248 |
| C  | 17.377833 | 7.628673  | 13.295596 |
| C  | 17.148702 | 5.038152  | 14.311687 |
| H  | 16.675032 | 4.445139  | 12.292353 |
| C  | 17.579690 | 7.391895  | 14.657371 |
| H  | 17.479724 | 8.642359  | 12.900445 |
| C  | 17.468083 | 6.095126  | 15.171398 |
| H  | 17.045686 | 4.023643  | 14.705255 |

Go to: [\[table of contents\]](#) [\[references\]](#)

|   |           |          |           |
|---|-----------|----------|-----------|
| H | 17.830421 | 8.224401 | 15.319824 |
| H | 17.625841 | 5.909611 | 16.236754 |

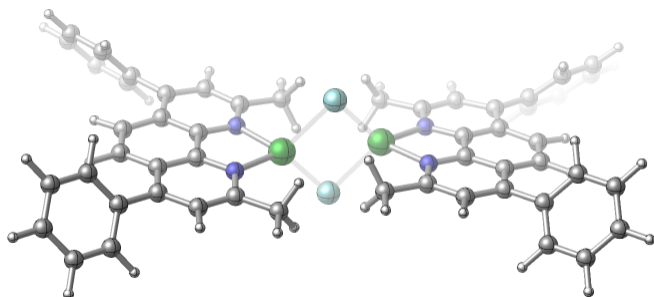

|                                              |                             |
|----------------------------------------------|-----------------------------|
| Zero-point correction=                       | 0.781378 (Hartree/Particle) |
| Thermal correction to Energy=                | 0.834313                    |
| Thermal correction to Enthalpy=              | 0.835257                    |
| Thermal correction to Gibbs Free Energy=     | 0.688603                    |
| Sum of electronic and zero-point Energies=   | -6159.220119                |
| Sum of electronic and thermal Energies=      | -6159.167183                |
| Sum of electronic and thermal Enthalpies=    | -6159.166239                |
| Sum of electronic and thermal Free Energies= | -6159.312893                |

uB3LYP-d3/def2-tzvpp-CPCM(THF)//uB3LYP-d3/def2-svp-CPCM(THF)

E(scf) = -6163.135134 a.u.

uPBE0-d3/def2-tzvpp-CPCM(THF)//uB3LYP-d3/def2-svp-CPCM(THF)

E(scf) = -6159.568689 a.u.

**<sup>3</sup>[(L4)NiCl]<sub>2</sub>**

E(scf) = -6160.00164312 a.u.

$\nu_{\min} = 6.93 \text{ cm}^{-1}$

|    |           |          |           |
|----|-----------|----------|-----------|
| Ni | 15.902646 | 7.658390 | 6.340179  |
| N  | 17.218515 | 6.133985 | 6.246083  |
| N  | 16.188104 | 7.443513 | 8.266239  |
| C  | 17.057298 | 6.432431 | 8.589702  |
| C  | 17.616671 | 5.718352 | 7.482812  |
| C  | 18.401891 | 5.062984 | 10.100151 |
| H  | 18.750702 | 4.838518 | 11.108171 |
| C  | 18.539683 | 4.657425 | 7.688663  |
| C  | 18.935493 | 4.378586 | 9.042324  |
| H  | 19.697621 | 3.620981 | 9.225175  |
| C  | 15.953677 | 7.891088 | 10.610045 |
| H  | 15.475000 | 8.489627 | 11.387227 |
| C  | 17.414487 | 6.095782 | 9.921908  |
| C  | 16.815452 | 6.843422 | 10.978492 |
| C  | 17.720888 | 5.531146 | 5.160925  |
| C  | 15.655345 | 8.170956 | 9.274640  |
| C  | 18.626980 | 4.463160 | 5.282262  |
| H  | 18.990562 | 3.977686 | 4.375219  |
| C  | 19.040758 | 3.992121 | 6.532864  |
| C  | 14.725005 | 9.270563 | 8.862090  |
| H  | 15.245839 | 9.955274 | 8.172910  |
| H  | 14.339629 | 9.841003 | 9.717257  |

Go to: [\[table of contents\]](#) [\[references\]](#)

|    |           |           |           |
|----|-----------|-----------|-----------|
| H  | 13.877263 | 8.848429  | 8.297832  |
| C  | 17.252581 | 6.046497  | 3.834717  |
| H  | 17.422940 | 7.132654  | 3.784548  |
| H  | 16.162234 | 5.915300  | 3.752627  |
| H  | 17.751464 | 5.550264  | 2.992189  |
| Cl | 16.532888 | 9.545846  | 4.971630  |
| Cl | 13.989370 | 7.185714  | 4.954277  |
| N  | 14.425628 | 9.364711  | 1.658204  |
| N  | 13.180772 | 10.476628 | 3.676789  |
| C  | 12.782615 | 10.888972 | 2.438941  |
| C  | 13.460032 | 10.283799 | 1.333020  |
| C  | 11.509026 | 12.267925 | 0.875777  |
| H  | 10.793291 | 13.068998 | 0.690685  |
| C  | 13.135920 | 10.648735 | -0.000223 |
| C  | 12.157027 | 11.689124 | -0.181194 |
| H  | 11.946123 | 12.041602 | -1.190880 |
| C  | 11.596847 | 11.984108 | 4.637625  |
| H  | 11.137412 | 12.381396 | 5.544102  |
| C  | 11.773541 | 11.868054 | 2.231061  |
| C  | 11.143962 | 12.414848 | 3.386114  |
| C  | 15.121558 | 8.790362  | 0.650243  |
| C  | 12.611731 | 11.019186 | 4.760861  |
| C  | 14.849972 | 9.092580  | -0.685999 |
| H  | 15.419775 | 8.578779  | -1.462354 |
| C  | 13.844619 | 10.002710 | -1.056016 |
| C  | 13.104624 | 10.530196 | 6.088042  |
| H  | 12.631635 | 11.052767 | 6.929559  |
| H  | 14.197521 | 10.650483 | 6.138679  |
| H  | 12.922978 | 9.447263  | 6.170853  |
| C  | 16.177154 | 7.810627  | 1.063705  |
| H  | 16.882646 | 8.299156  | 1.755759  |
| H  | 16.731467 | 7.401091  | 0.209173  |
| H  | 15.716103 | 6.981782  | 1.625325  |
| Ni | 14.619103 | 9.067799  | 3.585411  |
| C  | 13.571626 | 10.248666 | -2.492968 |
| C  | 14.634112 | 10.493926 | -3.385818 |
| C  | 12.262904 | 10.195036 | -3.014118 |
| C  | 14.395730 | 10.692854 | -4.747737 |
| H  | 15.655455 | 10.546008 | -3.000833 |
| C  | 12.025699 | 10.391984 | -4.376644 |
| H  | 11.427216 | 9.972769  | -2.346967 |
| C  | 13.090139 | 10.644842 | -5.249184 |
| H  | 15.234200 | 10.891321 | -5.420308 |
| H  | 11.003520 | 10.338751 | -4.760126 |
| H  | 12.903398 | 10.800247 | -6.314672 |
| C  | 10.044164 | 13.410929 | 3.308889  |



Go to: [\[table of contents\]](#) [\[references\]](#)

|   |           |           |           |
|---|-----------|-----------|-----------|
| C | 10.107400 | 14.594975 | 4.067458  |
| C | 8.901414  | 13.177453 | 2.519953  |
| C | 9.065674  | 15.525074 | 4.026924  |
| H | 10.990067 | 14.792396 | 4.680529  |
| C | 7.857512  | 14.105303 | 2.485450  |
| H | 8.823393  | 12.251369 | 1.946215  |
| C | 7.937377  | 15.283871 | 3.235434  |
| H | 9.137129  | 16.443878 | 4.614409  |
| H | 6.974748  | 13.903342 | 1.873608  |
| H | 7.121772  | 16.010602 | 3.205094  |
| C | 19.972793 | 2.837438  | 6.608395  |
| C | 21.151024 | 2.827595  | 5.838215  |
| C | 19.682018 | 1.714950  | 7.407424  |
| C | 22.020270 | 1.734525  | 5.877202  |
| H | 21.392807 | 3.693447  | 5.217135  |
| C | 20.548972 | 0.619900  | 7.440608  |
| H | 18.758605 | 1.693497  | 7.990278  |
| C | 21.722731 | 0.627113  | 6.678958  |
| H | 22.935735 | 1.749376  | 5.280434  |
| H | 20.302802 | -0.245841 | 8.060530  |
| H | 22.401771 | -0.228636 | 6.708202  |
| C | 17.062175 | 6.568700  | 12.415060 |
| C | 16.944587 | 5.269065  | 12.948158 |
| C | 17.374728 | 7.623737  | 13.295606 |
| C | 17.144631 | 5.032799  | 14.310424 |
| H | 16.670169 | 4.441049  | 12.290906 |
| C | 17.576827 | 7.386160  | 14.657204 |
| H | 17.476987 | 8.637580  | 12.900955 |
| C | 17.464733 | 6.089180  | 15.170596 |
| H | 17.041230 | 4.018138  | 14.703497 |
| H | 17.828122 | 8.218206  | 15.320023 |
| H | 17.622669 | 5.903044  | 16.235818 |

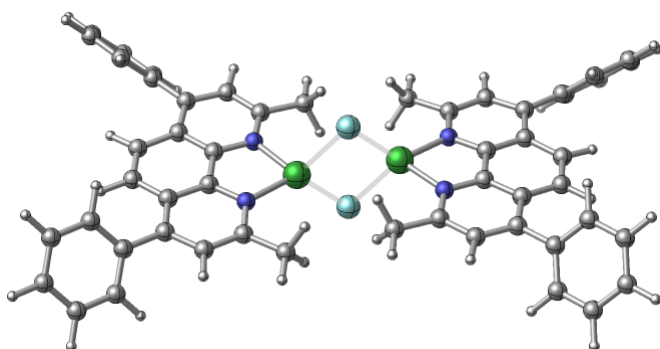

|                                            |                             |
|--------------------------------------------|-----------------------------|
| Zero-point correction=                     | 0.781349 (Hartree/Particle) |
| Thermal correction to Energy=              | 0.834303                    |
| Thermal correction to Enthalpy=            | 0.835247                    |
| Thermal correction to Gibbs Free Energy=   | 0.687356                    |
| Sum of electronic and zero-point Energies= | -6159.220294                |

Sum of electronic and thermal Energies= -6159.167341  
 Sum of electronic and thermal Enthalpies= -6159.166396  
 Sum of electronic and thermal Free Energies= -6159.314287

uB3LYP-d3/def2-tzvpp-CPCM(THF)//uB3LYP-d3/def2-svp-CPCM(THF)

E(scf) = -6163.135266 a.u.

uPBE0-d3/def2-tzvpp-CPCM(THF)//uB3LYP-d3/def2-svp-CPCM(THF)

E(scf) = -6159.568861 a.u.

**<sup>1</sup>TS2**

E(scf) = -6159.99593760 a.u.

$\nu_{\min} = -34.60 \text{ cm}^{-1}$

|    |           |           |           |
|----|-----------|-----------|-----------|
| Ni | 16.438860 | 7.843578  | 6.406707  |
| N  | 17.309283 | 6.068954  | 6.436999  |
| N  | 16.426466 | 7.618651  | 8.365159  |
| C  | 16.912050 | 6.401881  | 8.750674  |
| C  | 17.391810 | 5.552214  | 7.691030  |
| C  | 17.434708 | 4.629637  | 10.349561 |
| H  | 17.408815 | 4.247274  | 11.369867 |
| C  | 17.918727 | 4.268876  | 7.975919  |
| C  | 17.884943 | 3.821110  | 9.341233  |
| H  | 18.210369 | 2.807082  | 9.573452  |
| C  | 16.029469 | 8.112054  | 10.671828 |
| H  | 15.690956 | 8.842525  | 11.408860 |
| C  | 16.969833 | 5.966772  | 10.096526 |
| C  | 16.518781 | 6.880726  | 11.100469 |
| C  | 17.745384 | 5.348069  | 5.398988  |
| C  | 15.990215 | 8.464941  | 9.307458  |
| C  | 18.293122 | 4.063913  | 5.598124  |
| H  | 18.663656 | 3.512499  | 4.732362  |
| C  | 18.404580 | 3.503983  | 6.869287  |
| C  | 15.461594 | 9.797998  | 8.862712  |
| H  | 15.913666 | 10.086254 | 7.902305  |
| H  | 15.655242 | 10.577689 | 9.613160  |
| H  | 14.371159 | 9.744688  | 8.710227  |
| C  | 17.610214 | 5.968914  | 4.042718  |
| H  | 17.934554 | 7.020590  | 4.079292  |
| H  | 16.542092 | 5.991486  | 3.772488  |
| H  | 18.177633 | 5.425724  | 3.275484  |
| Cl | 16.359524 | 9.549314  | 4.900361  |
| Cl | 14.164387 | 6.481305  | 4.768536  |
| N  | 14.378673 | 9.051964  | 1.810237  |
| N  | 12.992348 | 9.790631  | 3.902803  |
| C  | 12.655309 | 10.398065 | 2.728248  |
| C  | 13.414034 | 10.000863 | 1.583058  |
| C  | 11.317815 | 11.863994 | 1.306959  |
| H  | 10.476197 | 12.545026 | 1.179068  |
| C  | 13.151771 | 10.566068 | 0.307200  |

Go to: [\[table of contents\]](#) [\[references\]](#)

|    |           |           |           |
|----|-----------|-----------|-----------|
| C  | 12.045353 | 11.484139 | 0.211429  |
| H  | 11.766643 | 11.869969 | -0.769301 |
| C  | 11.301161 | 11.066083 | 5.000467  |
| H  | 10.800516 | 11.321151 | 5.935895  |
| C  | 11.617798 | 11.364080 | 2.621705  |
| C  | 10.930876 | 11.718827 | 3.817458  |
| C  | 15.135878 | 8.644348  | 0.765812  |
| C  | 12.331717 | 10.110460 | 5.022189  |
| C  | 14.941481 | 9.162212  | -0.515010 |
| H  | 15.589944 | 8.816651  | -1.322255 |
| C  | 13.963747 | 10.140539 | -0.784992 |
| C  | 12.752849 | 9.401791  | 6.275548  |
| H  | 12.257978 | 9.808550  | 7.167506  |
| H  | 13.845579 | 9.466714  | 6.387475  |
| H  | 12.535863 | 8.325480  | 6.186067  |
| C  | 16.185821 | 7.623477  | 1.091655  |
| H  | 16.854901 | 8.017901  | 1.874650  |
| H  | 16.782521 | 7.336861  | 0.215633  |
| H  | 15.710096 | 6.723314  | 1.516747  |
| Ni | 14.514438 | 8.491226  | 3.682053  |
| C  | 9.854482  | 12.742473 | 3.855608  |
| C  | 8.626913  | 12.454372 | 4.481772  |
| C  | 10.047383 | 14.028493 | 3.315188  |
| C  | 7.617341  | 13.417509 | 4.552294  |
| H  | 8.460357  | 11.459446 | 4.901711  |
| C  | 9.039188  | 14.992737 | 3.391508  |
| H  | 11.003547 | 14.279210 | 2.850753  |
| C  | 7.819490  | 14.690057 | 4.006804  |
| H  | 6.667215  | 13.171586 | 5.033246  |
| H  | 9.210235  | 15.987879 | 2.973264  |
| H  | 7.030502  | 15.444121 | 4.063321  |
| C  | 13.826557 | 10.675493 | -2.161206 |
| C  | 13.781569 | 9.797038  | -3.262814 |
| C  | 13.787263 | 12.061855 | -2.415253 |
| C  | 13.685521 | 10.285280 | -4.567993 |
| H  | 13.804425 | 8.718620  | -3.087833 |
| C  | 13.692883 | 12.549401 | -3.721015 |
| H  | 13.856486 | 12.763256 | -1.580947 |
| C  | 13.638315 | 11.664011 | -4.803385 |
| H  | 13.642087 | 9.584480  | -5.405782 |
| H  | 13.671112 | 13.628466 | -3.894216 |
| H  | 13.563066 | 12.046404 | -5.824384 |
| C  | 16.564335 | 6.572312  | 12.553004 |
| C  | 15.420548 | 6.762865  | 13.350733 |
| C  | 17.751621 | 6.134301  | 13.170425 |
| C  | 15.458783 | 6.509690  | 14.724189 |

Go to: [\[table of contents\]](#) [\[references\]](#)

|   |           |           |           |
|---|-----------|-----------|-----------|
| H | 14.490810 | 7.097075  | 12.884057 |
| C | 17.789824 | 5.887615  | 14.544938 |
| H | 18.656165 | 6.007643  | 12.571516 |
| C | 16.643148 | 6.070646  | 15.325740 |
| H | 14.558242 | 6.653538  | 15.326393 |
| H | 18.722165 | 5.556355  | 15.008952 |
| H | 16.673451 | 5.874040  | 16.400273 |
| C | 19.019422 | 2.160564  | 7.028801  |
| C | 20.081380 | 1.945876  | 7.927893  |
| C | 18.574736 | 1.083106  | 6.240271  |
| C | 20.676031 | 0.686600  | 8.038775  |
| H | 20.456802 | 2.777744  | 8.527923  |
| C | 19.166063 | -0.177322 | 6.357356  |
| H | 17.747854 | 1.234675  | 5.542299  |
| C | 20.218089 | -0.379832 | 7.257144  |
| H | 21.505016 | 0.539670  | 8.735549  |
| H | 18.801333 | -1.005375 | 5.744502  |
| H | 20.681645 | -1.365313 | 7.347456  |

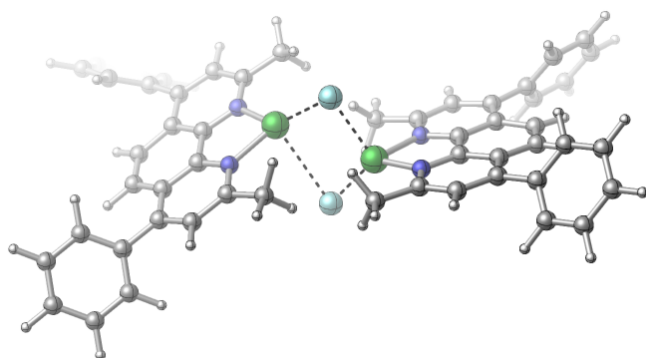

|                                              |                             |
|----------------------------------------------|-----------------------------|
| Zero-point correction=                       | 0.781635 (Hartree/Particle) |
| Thermal correction to Energy=                | 0.833681                    |
| Thermal correction to Enthalpy=              | 0.834625                    |
| Thermal correction to Gibbs Free Energy=     | 0.689658                    |
| Sum of electronic and zero-point Energies=   | -6159.214303                |
| Sum of electronic and thermal Energies=      | -6159.162257                |
| Sum of electronic and thermal Enthalpies=    | -6159.161313                |
| Sum of electronic and thermal Free Energies= | -6159.306279                |

uB3LYP-d3/def2-tzvpp-CPCM(THF)//uB3LYP-d3/def2-svp-CPCM(THF)  
E(scf) = -6163.133609 a.u.  
uPBE0-d3/def2-tzvpp-CPCM(THF)//uB3LYP-d3/def2-svp-CPCM(THF)  
E(scf) = -6159.56622 a.u.

### <sup>3</sup>TS2

E(scf) = -6159.99605127 a.u.

$\nu_{\min} = -37.52 \text{ cm}^{-1}$

|    |           |          |          |
|----|-----------|----------|----------|
| Ni | 16.444228 | 7.842578 | 6.387154 |
| N  | 17.312298 | 6.068034 | 6.425837 |
| N  | 16.430292 | 7.625886 | 8.348226 |
| C  | 16.912308 | 6.408939 | 8.737872 |

Go to: [\[table of contents\]](#) [\[references\]](#)

|    |           |           |           |
|----|-----------|-----------|-----------|
| C  | 17.391661 | 5.554920  | 7.681496  |
| C  | 17.428484 | 4.639990  | 10.342652 |
| H  | 17.400146 | 4.260706  | 11.364039 |
| C  | 17.915331 | 4.271254  | 7.970890  |
| C  | 17.878373 | 3.827466  | 9.337393  |
| H  | 18.201097 | 2.813367  | 9.573054  |
| C  | 16.031673 | 8.126675  | 10.653046 |
| H  | 15.694107 | 8.860148  | 11.387545 |
| C  | 16.967203 | 5.977462  | 10.084996 |
| C  | 16.517100 | 6.895407  | 11.085759 |
| C  | 17.748587 | 5.343306  | 5.390609  |
| C  | 15.995208 | 8.475930  | 9.287489  |
| C  | 18.293348 | 4.058659  | 5.594294  |
| H  | 18.664204 | 3.503997  | 4.730750  |
| C  | 18.401391 | 3.502127  | 6.867258  |
| C  | 15.471233 | 9.809978  | 8.840022  |
| H  | 15.913660 | 10.088931 | 7.872578  |
| H  | 15.680165 | 10.592695 | 9.583289  |
| H  | 14.378534 | 9.764367  | 8.702001  |
| C  | 17.616435 | 5.960597  | 4.032418  |
| H  | 17.940969 | 7.012325  | 4.066852  |
| H  | 16.548879 | 5.982282  | 3.759964  |
| H  | 18.185379 | 5.415383  | 3.267750  |
| Cl | 16.357606 | 9.551472  | 4.887467  |
| Cl | 14.170536 | 6.463673  | 4.764820  |
| N  | 14.378704 | 9.041166  | 1.810600  |
| N  | 12.990941 | 9.771491  | 3.905645  |
| C  | 12.655786 | 10.384721 | 2.733455  |
| C  | 13.415332 | 9.992256  | 1.587218  |
| C  | 11.321412 | 11.858993 | 1.317766  |
| H  | 10.480643 | 12.541514 | 1.192242  |
| C  | 13.155133 | 10.564032 | 0.313779  |
| C  | 12.049762 | 11.483709 | 0.221228  |
| H  | 11.772526 | 11.874579 | -0.757921 |
| C  | 11.299919 | 11.043689 | 5.007432  |
| H  | 10.798553 | 11.294956 | 5.943499  |
| C  | 11.619417 | 11.352446 | 2.630431  |
| C  | 10.931549 | 11.702331 | 3.826995  |
| C  | 15.136877 | 8.638230  | 0.765151  |
| C  | 12.329507 | 10.087069 | 5.025805  |
| C  | 14.944447 | 9.162460  | -0.513350 |
| H  | 15.593390 | 8.820171  | -1.321598 |
| C  | 13.967819 | 10.143039 | -0.779555 |
| C  | 12.748519 | 9.372463  | 6.276517  |
| H  | 12.255228 | 9.777695  | 7.170048  |
| H  | 13.841396 | 9.433409  | 6.388443  |

Go to: [\[table of contents\]](#) [\[references\]](#)

|    |           |           |           |
|----|-----------|-----------|-----------|
| H  | 12.527956 | 8.297216  | 6.183463  |
| C  | 16.185750 | 7.615028  | 1.087252  |
| H  | 16.854560 | 8.005782  | 1.872304  |
| H  | 16.782820 | 7.331696  | 0.210416  |
| H  | 15.709022 | 6.713494  | 1.508238  |
| Ni | 14.515636 | 8.475534  | 3.681867  |
| C  | 9.856212  | 12.726928 | 3.868880  |
| C  | 8.627751  | 12.437228 | 4.492577  |
| C  | 10.050966 | 14.015303 | 3.334748  |
| C  | 7.619157  | 13.401111 | 4.566763  |
| H  | 8.459742  | 11.440513 | 4.907672  |
| C  | 9.043741  | 14.980268 | 3.414724  |
| H  | 11.007833 | 14.267202 | 2.872406  |
| C  | 7.823162  | 14.676015 | 4.027493  |
| H  | 6.668338  | 13.153944 | 5.045709  |
| H  | 9.216252  | 15.977197 | 3.001364  |
| H  | 7.034945  | 15.430665 | 4.086896  |
| C  | 13.832473 | 10.684733 | -2.153312 |
| C  | 13.787697 | 9.811624  | -3.259179 |
| C  | 13.794660 | 12.072335 | -2.400754 |
| C  | 13.693193 | 10.306210 | -4.562079 |
| H  | 13.809458 | 8.732358  | -3.089353 |
| C  | 13.701820 | 12.566230 | -3.704237 |
| H  | 13.863798 | 12.769659 | -1.563032 |
| C  | 13.647382 | 11.686098 | -4.790894 |
| H  | 13.649856 | 9.609485  | -5.403264 |
| H  | 13.681147 | 13.646135 | -3.872268 |
| H  | 13.573324 | 12.073459 | -5.810106 |
| C  | 16.559976 | 6.590881  | 12.539216 |
| C  | 15.415475 | 6.785960  | 13.334788 |
| C  | 17.745520 | 6.152123  | 13.159420 |
| C  | 15.451294 | 6.536401  | 14.708975 |
| H  | 14.487096 | 7.120842  | 12.865898 |
| C  | 17.781323 | 5.909100  | 14.534649 |
| H  | 18.650602 | 6.021937  | 12.562082 |
| C  | 16.633931 | 6.096575  | 15.313341 |
| H  | 14.550223 | 6.683713  | 15.309543 |
| H  | 18.712337 | 5.577190  | 15.000855 |
| H  | 16.662347 | 5.902805  | 16.388441 |
| C  | 19.013028 | 2.157834  | 7.031597  |
| C  | 20.072986 | 1.943318  | 7.933089  |
| C  | 18.567379 | 1.079181  | 6.245238  |
| C  | 20.664738 | 0.683074  | 8.048410  |
| H  | 20.449200 | 2.776011  | 8.531476  |
| C  | 19.155798 | -0.182184 | 6.366756  |
| H  | 17.742021 | 1.230620  | 5.545436  |

Go to: [\[table of contents\]](#) [\[references\]](#)

|   |           |           |          |
|---|-----------|-----------|----------|
| C | 20.205854 | -0.384496 | 7.268890 |
| H | 21.492223 | 0.536268  | 8.746990 |
| H | 18.790344 | -1.011116 | 5.755524 |
| H | 20.667150 | -1.370714 | 7.362660 |

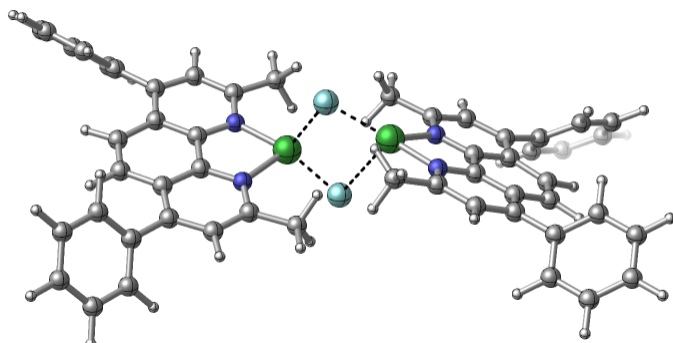

|                                              |                             |
|----------------------------------------------|-----------------------------|
| Zero-point correction=                       | 0.781629 (Hartree/Particle) |
| Thermal correction to Energy=                | 0.833683                    |
| Thermal correction to Enthalpy=              | 0.834627                    |
| Thermal correction to Gibbs Free Energy=     | 0.688458                    |
| Sum of electronic and zero-point Energies=   | -6159.214423                |
| Sum of electronic and thermal Energies=      | -6159.162369                |
| Sum of electronic and thermal Enthalpies=    | -6159.161424                |
| Sum of electronic and thermal Free Energies= | -6159.307593                |

uB3LYP-d3/def2-tzvpp-CPCM(THF)//uB3LYP-d3/def2-svp-CPCM(THF)

E(scf) = -6163.133654 a.u.

uPBE0-d3/def2-tzvpp-CPCM(THF)//uB3LYP-d3/def2-svp-CPCM(THF)

E(scf) = -6159.566302 a.u.

### **<sup>2</sup>(L4)NiCl**

E(scf) = -3079.98247907 a.u.

$\nu_{\min} = 30.28 \text{ cm}^{-1}$

|    |           |           |          |
|----|-----------|-----------|----------|
| Ni | 27.585046 | 10.193442 | 1.881795 |
| N  | 28.852243 | 8.734961  | 2.264916 |
| N  | 26.924784 | 9.766906  | 3.692962 |
| C  | 27.559492 | 8.699459  | 4.249448 |
| C  | 28.622119 | 8.131025  | 3.462829 |
| C  | 27.924283 | 6.967638  | 5.929831 |
| H  | 27.629850 | 6.481468  | 6.859867 |
| C  | 29.345946 | 7.008865  | 3.931547 |
| C  | 28.935645 | 6.427229  | 5.181707 |
| H  | 29.429625 | 5.519614  | 5.528538 |
| C  | 25.518372 | 9.860396  | 5.620374 |
| H  | 24.707231 | 10.369714 | 6.143531 |
| C  | 27.217182 | 8.146661  | 5.506481 |
| C  | 26.156115 | 8.778956  | 6.227826 |
| C  | 25.720179 | 8.330001  | 7.575175 |
| C  | 29.815294 | 8.254716  | 1.468712 |
| C  | 25.914667 | 10.341991 | 4.356377 |
| C  | 30.591399 | 7.147777  | 1.866343 |

Go to: [\[table of contents\]](#) [\[references\]](#)

|    |           |           |           |
|----|-----------|-----------|-----------|
| H  | 31.384536 | 6.799522  | 1.202564  |
| C  | 30.393765 | 6.513880  | 3.093077  |
| C  | 24.356676 | 8.097869  | 7.835718  |
| H  | 23.629221 | 8.211032  | 7.028338  |
| C  | 26.644258 | 8.171472  | 8.625640  |
| H  | 27.702787 | 8.373873  | 8.448150  |
| C  | 24.858729 | 7.546880  | 10.142015 |
| H  | 24.525241 | 7.241125  | 11.136744 |
| C  | 25.269952 | 11.531690 | 3.706511  |
| H  | 24.312306 | 11.791243 | 4.177505  |
| H  | 25.125508 | 11.342254 | 2.631705  |
| H  | 25.942872 | 12.403384 | 3.775647  |
| C  | 30.041402 | 8.977246  | 0.172514  |
| H  | 30.667771 | 8.398723  | -0.519751 |
| H  | 30.534068 | 9.945091  | 0.367311  |
| H  | 29.075806 | 9.215804  | -0.299685 |
| C  | 23.930760 | 7.705041  | 9.106978  |
| H  | 22.869315 | 7.519094  | 9.288753  |
| C  | 26.215786 | 7.785049  | 9.897915  |
| H  | 26.945586 | 7.675058  | 10.703865 |
| C  | 31.260044 | 5.370143  | 3.478088  |
| C  | 32.955070 | 3.222263  | 4.155224  |
| H  | 33.610479 | 2.388544  | 4.418898  |
| C  | 31.929805 | 5.346330  | 4.716455  |
| H  | 31.806546 | 6.178825  | 5.412646  |
| C  | 32.771074 | 4.282102  | 5.050098  |
| H  | 33.289725 | 4.284023  | 6.012002  |
| C  | 31.461662 | 4.303630  | 2.582013  |
| H  | 30.943670 | 4.305801  | 1.619961  |
| C  | 32.298143 | 3.236947  | 2.920054  |
| H  | 32.434870 | 2.412238  | 2.216183  |
| Cl | 26.949925 | 11.433088 | 0.180223  |

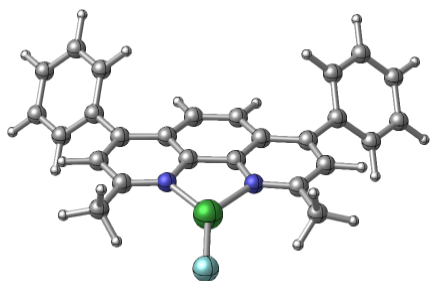

|                                            |                             |
|--------------------------------------------|-----------------------------|
| Zero-point correction=                     | 0.390107 (Hartree/Particle) |
| Thermal correction to Energy=              | 0.415940                    |
| Thermal correction to Enthalpy=            | 0.416885                    |
| Thermal correction to Gibbs Free Energy=   | 0.331159                    |
| Sum of electronic and zero-point Energies= | -3079.592372                |
| Sum of electronic and thermal Energies=    | -3079.566539                |
| Sum of electronic and thermal Enthalpies=  | -3079.565595                |



Sum of electronic and thermal Free Energies= -3079.651320

uB3LYP-d3/def2-tzvpp-CPCM(THF)//uB3LYP-d3/def2-svp-CPCM(THF)

E(scf) = -3081.563192 a.u.

uPBE0-d3/def2-tzvpp-CPCM(THF)//uB3LYP-d3/def2-svp-CPCM(THF)

E(scf) = -3079.779317 a.u.

uB3LYP-d3/def2-svp(Gas)//uB3LYP-d3/def2-svp-CPCM(THF)

E(scf) = -3079.966271 a.u.

DLPNO-CCSD(T)/def2-svp(Gas)//uB3LYP-d3/def2-svp-CPCM(THF)

E(scf) = -3074.925397 a.u.

**<sup>1</sup>(L4)NiBr<sub>2</sub>**

E(scf) = -7767.67679001 a.u.

$\nu_{\min} = 22.86 \text{ cm}^{-1}$

|    |           |           |           |
|----|-----------|-----------|-----------|
| Ni | 27.370711 | 10.395564 | 1.886649  |
| N  | 28.912855 | 8.742738  | 2.161381  |
| N  | 26.854951 | 9.801888  | 3.593164  |
| C  | 27.561509 | 8.767386  | 4.131079  |
| C  | 28.660652 | 8.203406  | 3.367788  |
| C  | 28.092656 | 7.212537  | 5.952874  |
| H  | 27.906828 | 6.863122  | 6.967832  |
| C  | 29.425313 | 7.134229  | 3.908383  |
| C  | 29.127812 | 6.681327  | 5.236953  |
| H  | 29.755143 | 5.913699  | 5.689628  |
| C  | 25.482208 | 9.884731  | 5.529779  |
| H  | 24.635769 | 10.345662 | 6.039951  |
| C  | 27.253532 | 8.247396  | 5.414956  |
| C  | 26.150930 | 8.821218  | 6.122138  |
| C  | 25.702216 | 8.327274  | 7.449796  |
| C  | 29.912408 | 8.290715  | 1.418322  |
| C  | 25.844044 | 10.370804 | 4.258440  |
| C  | 30.717579 | 7.218654  | 1.864384  |
| H  | 31.515645 | 6.844747  | 1.220569  |
| C  | 30.482693 | 6.614355  | 3.095409  |
| C  | 25.535909 | 9.230538  | 8.515395  |
| H  | 25.780039 | 10.285433 | 8.369446  |
| C  | 25.389309 | 6.970232  | 7.653889  |
| H  | 25.489399 | 6.262027  | 6.828440  |
| C  | 24.777498 | 7.433398  | 9.953238  |
| H  | 24.420690 | 7.085552  | 10.925744 |
| C  | 25.115365 | 11.507333 | 3.611761  |
| H  | 24.310049 | 11.885311 | 4.254510  |
| H  | 24.694776 | 11.175376 | 2.649451  |
| H  | 25.824623 | 12.320611 | 3.391715  |
| C  | 30.112310 | 8.968438  | 0.092702  |
| H  | 30.981585 | 8.578569  | -0.453239 |
| H  | 30.234928 | 10.051759 | 0.252955  |
| H  | 29.208476 | 8.839525  | -0.525038 |
| C  | 25.083074 | 8.784755  | 9.759565  |

Go to: [\[table of contents\]](#) [\[references\]](#)

|    |           |           |           |
|----|-----------|-----------|-----------|
| H  | 24.970072 | 9.496285  | 10.581101 |
| C  | 24.927377 | 6.529018  | 8.896040  |
| H  | 24.679499 | 5.474199  | 9.036970  |
| C  | 31.324249 | 5.464020  | 3.519549  |
| C  | 32.940084 | 3.273838  | 4.243196  |
| H  | 33.566814 | 2.424468  | 4.525924  |
| C  | 30.743227 | 4.243477  | 3.911573  |
| H  | 29.655791 | 4.140517  | 3.917561  |
| C  | 31.545928 | 3.157061  | 4.267964  |
| H  | 31.079516 | 2.213486  | 4.561681  |
| C  | 32.726850 | 5.566919  | 3.487886  |
| H  | 33.189500 | 6.510821  | 3.189810  |
| C  | 33.527919 | 4.481603  | 3.852149  |
| H  | 34.615976 | 4.581005  | 3.831977  |
| Br | 28.678224 | 12.200833 | 2.613111  |
| Br | 25.753739 | 9.203003  | 0.681897  |

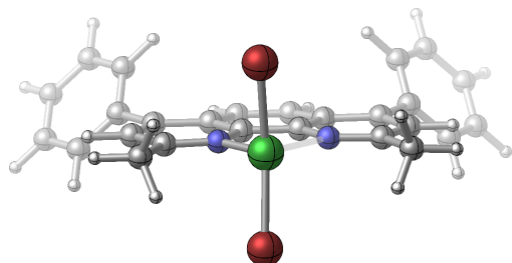

|                                              |                             |
|----------------------------------------------|-----------------------------|
| Zero-point correction=                       | 0.391432 (Hartree/Particle) |
| Thermal correction to Energy=                | 0.419395                    |
| Thermal correction to Enthalpy=              | 0.420339                    |
| Thermal correction to Gibbs Free Energy=     | 0.329411                    |
| Sum of electronic and zero-point Energies=   | -7767.285358                |
| Sum of electronic and thermal Energies=      | -7767.257395                |
| Sum of electronic and thermal Enthalpies=    | -7767.256451                |
| Sum of electronic and thermal Free Energies= | -7767.347379                |

### <sup>3</sup>(L4)NiBr<sub>2</sub>

E(scf) = -7767.73765086 a.u.

$\nu_{\min} = 26.65 \text{ cm}^{-1}$

|    |           |           |          |
|----|-----------|-----------|----------|
| Ni | 27.496236 | 10.234627 | 1.799066 |
| N  | 28.823895 | 8.751625  | 2.205490 |
| N  | 26.848885 | 9.771686  | 3.664389 |
| C  | 27.553141 | 8.756857  | 4.220762 |
| C  | 28.623452 | 8.201110  | 3.427625 |
| C  | 28.151894 | 7.229817  | 6.032669 |
| H  | 28.007657 | 6.882792  | 7.055437 |
| C  | 29.417694 | 7.146200  | 3.937121 |
| C  | 29.163988 | 6.700084  | 5.279558 |
| H  | 29.811400 | 5.938168  | 5.712840 |
| C  | 25.526316 | 9.910699  | 5.633767 |
| H  | 24.695756 | 10.388711 | 6.154929 |
| C  | 27.288980 | 8.257672  | 5.518576 |

Go to: [\[table of contents\]](#) [\[references\]](#)

|    |           |           |           |
|----|-----------|-----------|-----------|
| C  | 26.207089 | 8.858207  | 6.238882  |
| C  | 25.797826 | 8.402571  | 7.592359  |
| C  | 29.809754 | 8.315610  | 1.423024  |
| C  | 25.861332 | 10.358349 | 4.338239  |
| C  | 30.634841 | 7.253454  | 1.849974  |
| H  | 31.413823 | 6.892765  | 1.176917  |
| C  | 30.451220 | 6.639819  | 3.085576  |
| C  | 25.506040 | 7.049381  | 7.847240  |
| H  | 25.588026 | 6.317090  | 7.041025  |
| C  | 25.653076 | 9.336473  | 8.634637  |
| H  | 25.882200 | 10.388649 | 8.449887  |
| C  | 24.956887 | 7.576983  | 10.148526 |
| H  | 24.632719 | 7.255782  | 11.141408 |
| C  | 25.143714 | 11.478205 | 3.648317  |
| H  | 24.712940 | 11.107946 | 2.703045  |
| H  | 25.869811 | 12.262890 | 3.378156  |
| H  | 24.349293 | 11.909023 | 4.270462  |
| C  | 29.972303 | 8.989451  | 0.094375  |
| H  | 30.825079 | 8.592573  | -0.470422 |
| H  | 30.101207 | 10.073416 | 0.248952  |
| H  | 29.049397 | 8.861179  | -0.495852 |
| C  | 25.085694 | 6.641996  | 9.115516  |
| H  | 24.853575 | 5.589607  | 9.295931  |
| C  | 25.241656 | 8.924799  | 9.904574  |
| H  | 25.145115 | 9.660166  | 10.707010 |
| C  | 31.318429 | 5.497854  | 3.473511  |
| C  | 32.977754 | 3.320821  | 4.129459  |
| H  | 33.621789 | 2.476171  | 4.386057  |
| C  | 32.717195 | 5.607020  | 3.368849  |
| H  | 33.160408 | 6.550509  | 3.041619  |
| C  | 33.540063 | 4.527971  | 3.700631  |
| H  | 34.625195 | 4.631577  | 3.625119  |
| C  | 30.762502 | 4.278258  | 3.903638  |
| H  | 29.677371 | 4.169933  | 3.964128  |
| C  | 31.587240 | 3.197909  | 4.225582  |
| H  | 31.140694 | 2.254367  | 4.548510  |
| Br | 28.777319 | 12.241704 | 2.129229  |
| Br | 25.877757 | 9.201171  | 0.355687  |

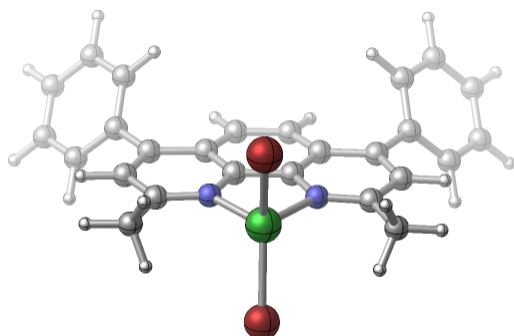

Zero-point correction= 0.392079 (Hartree/Particle)  
 Thermal correction to Energy= 0.419830  
 Thermal correction to Enthalpy= 0.420774  
 Thermal correction to Gibbs Free Energy= 0.329817  
 Sum of electronic and zero-point Energies= -7767.345571  
 Sum of electronic and thermal Energies= -7767.317821  
 Sum of electronic and thermal Enthalpies= -7767.316876  
 Sum of electronic and thermal Free Energies= -7767.407834

uB3LYP-d3/def2-tzvpp-CPCM(THF)//uB3LYP-d3/def2-svp-CPCM(THF)

E(scf) = -7769.773103 a.u.

uPBE0-d3/def2-tzvpp-CPCM(THF)//uB3LYP-d3/def2-svp-CPCM(THF)

E(scf) = -7767.509433 a.u.

uB3LYP-d3/def2-svp(Gas)//uB3LYP-d3/def2-svp-CPCM(THF)

E(scf) = -7767.71368 a.u.

DLPNO-CCSD(T)/def2-svp(Gas)//uB3LYP-d3/def2-svp-CPCM(THF)

E(scf) = -7760.204379 a.u.

### **<sup>2</sup>(L4)NiBr**

E(scf) = -5193.79191586 a.u.

$\nu_{\min} = 18.37 \text{ cm}^{-1}$

|    |           |           |          |
|----|-----------|-----------|----------|
| Ni | 27.538852 | 10.163840 | 1.849508 |
| N  | 28.793847 | 8.683345  | 2.230043 |
| N  | 26.857663 | 9.717211  | 3.649340 |
| C  | 27.541094 | 8.700839  | 4.240557 |
| C  | 28.608239 | 8.131777  | 3.458795 |
| C  | 28.120989 | 7.188439  | 6.066734 |
| H  | 27.971256 | 6.850004  | 7.091913 |
| C  | 29.398155 | 7.077655  | 3.976208 |
| C  | 29.135877 | 6.647961  | 5.323767 |
| H  | 29.777652 | 5.888039  | 5.769462 |
| C  | 25.509639 | 9.876769  | 5.613896 |
| H  | 24.674299 | 10.364136 | 6.119349 |
| C  | 27.262206 | 8.215548  | 5.540334 |
| C  | 26.176745 | 8.826559  | 6.243844 |
| C  | 25.746421 | 8.387318  | 7.596126 |
| C  | 29.776788 | 8.220501  | 1.449690 |
| C  | 25.861908 | 10.308498 | 4.319412 |
| C  | 30.601364 | 7.162697  | 1.882840 |
| H  | 31.375482 | 6.792402  | 1.208784 |

Go to: [\[table of contents\]](#) [\[references\]](#)

|    |           |           |           |
|----|-----------|-----------|-----------|
| C  | 30.428890 | 6.561367  | 3.129130  |
| C  | 25.573075 | 9.332972  | 8.623989  |
| H  | 25.796638 | 10.384596 | 8.429207  |
| C  | 25.460945 | 7.035493  | 7.867471  |
| H  | 25.563594 | 6.292357  | 7.073641  |
| C  | 24.863428 | 7.589491  | 10.150798 |
| H  | 24.523284 | 7.279487  | 11.141945 |
| C  | 25.146813 | 11.419898 | 3.609119  |
| H  | 24.387228 | 11.898076 | 4.241393  |
| H  | 24.668234 | 11.030209 | 2.695810  |
| H  | 25.875047 | 12.172727 | 3.268059  |
| C  | 29.928231 | 8.873952  | 0.107863  |
| H  | 30.768972 | 8.460202  | -0.464289 |
| H  | 30.064364 | 9.959601  | 0.236012  |
| H  | 28.997327 | 8.757344  | -0.470095 |
| C  | 25.139966 | 8.936239  | 9.891605  |
| H  | 25.020855 | 9.682513  | 10.680998 |
| C  | 25.021425 | 6.641640  | 9.133660  |
| H  | 24.796168 | 5.589486  | 9.324634  |
| C  | 31.303893 | 5.428404  | 3.526178  |
| C  | 32.982644 | 3.268882  | 4.204634  |
| H  | 33.633470 | 2.432083  | 4.469876  |
| C  | 32.701519 | 5.538618  | 3.402345  |
| H  | 33.137008 | 6.477253  | 3.051407  |
| C  | 33.533520 | 4.469423  | 3.743506  |
| H  | 34.617192 | 4.575946  | 3.651074  |
| C  | 30.760722 | 4.214094  | 3.987492  |
| H  | 29.676942 | 4.102007  | 4.063472  |
| C  | 31.593903 | 3.143687  | 4.321556  |
| H  | 31.155162 | 2.205320  | 4.669687  |
| Br | 27.178973 | 11.710738 | 0.135571  |

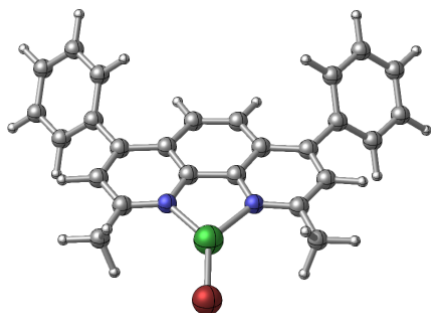

|                                            |                             |
|--------------------------------------------|-----------------------------|
| Zero-point correction=                     | 0.389910 (Hartree/Particle) |
| Thermal correction to Energy=              | 0.415911                    |
| Thermal correction to Enthalpy=            | 0.416856                    |
| Thermal correction to Gibbs Free Energy=   | 0.330136                    |
| Sum of electronic and zero-point Energies= | -5193.402006                |
| Sum of electronic and thermal Energies=    | -5193.376004                |
| Sum of electronic and thermal Enthalpies=  | -5193.375060                |

Sum of electronic and thermal Free Energies= -5193.461780

uB3LYP-d3/def2-tzvpp-CPCM(THF)//uB3LYP-d3/def2-svp-CPCM(THF)

E(scf) = -5195.523826 a.u.

uPBE0-d3/def2-tzvpp-CPCM(THF)//uB3LYP-d3/def2-svp-CPCM(THF)

E(scf) = -5193.580919 a.u.

uB3LYP-d3/def2-svp(Gas)//uB3LYP-d3/def2-svp-CPCM(THF)

E(scf) = -5193.775502 a.u.

DLPNO-CCSD(T)/def2-svp(Gas)//uB3LYP-d3/def2-svp-CPCM(THF)

E(scf) = -5187.771603 a.u.

**<sup>1</sup>(L4)Ni(OPh)<sub>2</sub>**

E(scf) = -3233.22788598 a.u.

$\nu_{\min} = 4.34 \text{ cm}^{-1}$

|    |           |           |           |
|----|-----------|-----------|-----------|
| Ni | 28.766125 | 10.399728 | 2.552010  |
| O  | 28.159381 | 9.974819  | 0.800521  |
| O  | 28.911392 | 12.282368 | 2.432083  |
| N  | 29.555240 | 8.578378  | 2.973474  |
| N  | 28.108118 | 10.236960 | 4.506820  |
| C  | 28.507675 | 9.060795  | 5.069710  |
| C  | 29.290891 | 8.168784  | 4.243896  |
| C  | 28.739246 | 7.471319  | 6.924535  |
| H  | 28.566109 | 7.221627  | 7.970794  |
| C  | 29.763072 | 6.940323  | 4.772555  |
| C  | 29.490269 | 6.635725  | 6.147234  |
| H  | 29.910603 | 5.729007  | 6.581157  |
| C  | 26.974787 | 10.763003 | 6.543046  |
| H  | 26.335534 | 11.464277 | 7.081506  |
| C  | 28.192098 | 8.690104  | 6.401659  |
| C  | 27.376331 | 9.588551  | 7.159726  |
| C  | 26.947170 | 9.306291  | 8.554324  |
| C  | 30.336524 | 7.832793  | 2.185157  |
| C  | 27.339503 | 11.073331 | 5.212061  |
| C  | 30.822035 | 6.585123  | 2.636670  |
| H  | 31.418517 | 5.981116  | 1.951536  |
| C  | 30.532382 | 6.102266  | 3.904821  |
| C  | 27.159815 | 10.265619 | 9.561017  |
| H  | 27.677348 | 11.196149 | 9.315953  |
| C  | 26.283051 | 8.110294  | 8.885225  |
| H  | 26.087553 | 7.367313  | 8.108853  |
| C  | 26.077232 | 8.834285  | 11.189494 |
| H  | 25.741541 | 8.649643  | 12.212872 |
| C  | 26.804688 | 12.314645 | 4.564038  |
| H  | 26.601046 | 13.092573 | 5.313025  |
| H  | 25.846773 | 12.073387 | 4.070040  |
| H  | 27.495971 | 12.678272 | 3.792675  |
| C  | 30.716241 | 8.354543  | 0.831787  |
| H  | 31.093991 | 7.550845  | 0.186081  |
| H  | 31.520159 | 9.102250  | 0.947799  |

Go to: [\[table of contents\]](#) [\[references\]](#)

|   |           |           |           |
|---|-----------|-----------|-----------|
| H | 29.859349 | 8.862609  | 0.368714  |
| C | 26.733388 | 10.027786 | 10.870042 |
| H | 26.915881 | 10.777766 | 11.643506 |
| C | 25.849347 | 7.878985  | 10.192771 |
| H | 25.327008 | 6.949684  | 10.432686 |
| C | 31.027992 | 4.762363  | 4.312832  |
| C | 31.974673 | 2.201763  | 5.000311  |
| H | 32.342203 | 1.208381  | 5.269016  |
| C | 32.383945 | 4.429715  | 4.139256  |
| H | 33.075423 | 5.178141  | 3.745084  |
| C | 32.854035 | 3.160782  | 4.486369  |
| H | 33.912158 | 2.921251  | 4.355990  |
| C | 30.151196 | 3.789626  | 4.829066  |
| H | 29.091085 | 4.024992  | 4.946294  |
| C | 30.621896 | 2.518559  | 5.166504  |
| H | 29.927244 | 1.770910  | 5.556951  |
| C | 27.331278 | 10.744177 | 0.112385  |
| C | 27.516741 | 10.925978 | -1.280275 |
| C | 26.222425 | 11.390559 | 0.713455  |
| C | 26.641511 | 11.717283 | -2.026030 |
| H | 28.374602 | 10.440500 | -1.752334 |
| C | 25.354582 | 12.182505 | -0.038980 |
| H | 26.073212 | 11.266368 | 1.788214  |
| C | 25.552842 | 12.355212 | -1.415650 |
| H | 26.814938 | 11.843629 | -3.099211 |
| H | 24.510838 | 12.673035 | 0.456369  |
| H | 24.872220 | 12.977416 | -2.002149 |
| C | 29.342913 | 12.900047 | 1.343400  |
| C | 28.756601 | 14.125240 | 0.942135  |
| C | 30.403561 | 12.392296 | 0.552338  |
| C | 29.205483 | 14.800354 | -0.193991 |
| H | 27.930637 | 14.519285 | 1.539580  |
| C | 30.841842 | 13.070104 | -0.585677 |
| H | 30.859654 | 11.444027 | 0.846174  |
| C | 30.249692 | 14.280501 | -0.971221 |
| H | 28.728831 | 15.742366 | -0.482177 |
| H | 31.658230 | 12.648623 | -1.180274 |
| H | 30.595321 | 14.809210 | -1.863062 |

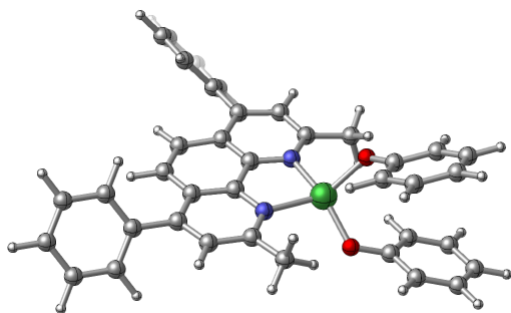

Zero-point correction= 0.578550 (Hartree/Particle)  
 Thermal correction to Energy= 0.615030  
 Thermal correction to Enthalpy= 0.615974  
 Thermal correction to Gibbs Free Energy= 0.505399  
 Sum of electronic and zero-point Energies= -3232.649336  
 Sum of electronic and thermal Energies= -3232.612856  
 Sum of electronic and thermal Enthalpies= -3232.611912  
 Sum of electronic and thermal Free Energies= -3232.722487

**<sup>3</sup>(L4)Ni(OPh)<sub>2</sub>**

E(scf) = -3233.25145697 a.u.

$\nu_{\min} = 13.83 \text{ cm}^{-1}$

|    |           |           |           |
|----|-----------|-----------|-----------|
| Ni | 27.457082 | 10.410047 | 2.094302  |
| O  | 25.990076 | 9.175942  | 1.849071  |
| O  | 28.296844 | 11.916814 | 1.296661  |
| N  | 28.888308 | 8.980109  | 2.456479  |
| N  | 27.446134 | 10.460041 | 4.134058  |
| C  | 28.079221 | 9.385953  | 4.662141  |
| C  | 28.846251 | 8.573185  | 3.747646  |
| C  | 28.732452 | 7.892961  | 6.484421  |
| H  | 28.735752 | 7.652912  | 7.547356  |
| C  | 29.485445 | 7.399235  | 4.208000  |
| C  | 29.434490 | 7.105986  | 5.613632  |
| H  | 29.985663 | 6.244834  | 5.991323  |
| C  | 26.586552 | 10.991350 | 6.285648  |
| H  | 25.961042 | 11.646886 | 6.893355  |
| C  | 27.994743 | 9.039886  | 6.031603  |
| C  | 27.183732 | 9.873748  | 6.863305  |
| C  | 26.938103 | 9.570150  | 8.296481  |
| C  | 29.575250 | 8.280644  | 1.555984  |
| C  | 26.722581 | 11.264676 | 4.908957  |
| C  | 30.224132 | 7.084398  | 1.928889  |
| H  | 30.736368 | 6.502448  | 1.161308  |
| C  | 30.158803 | 6.601751  | 3.231595  |
| C  | 27.137031 | 10.558625 | 9.276959  |
| H  | 27.517922 | 11.539492 | 8.982510  |
| C  | 26.450469 | 8.309570  | 8.690205  |
| H  | 26.265784 | 7.542591  | 7.934577  |
| C  | 26.389084 | 9.030752  | 11.003371 |
| H  | 26.177797 | 8.820594  | 12.054709 |



Go to: [\[table of contents\]](#) [\[references\]](#)

|   |           |           |           |
|---|-----------|-----------|-----------|
| C | 26.028778 | 12.408297 | 4.230869  |
| H | 25.148990 | 12.026262 | 3.684897  |
| H | 26.698390 | 12.859432 | 3.482522  |
| H | 25.692939 | 13.172355 | 4.943951  |
| C | 29.580043 | 8.794938  | 0.146972  |
| H | 30.195090 | 8.171627  | -0.514482 |
| H | 29.954778 | 9.830453  | 0.125845  |
| H | 28.548684 | 8.815980  | -0.241806 |
| C | 26.870419 | 10.287690 | 10.621455 |
| H | 27.040419 | 11.061713 | 11.373809 |
| C | 26.175585 | 8.044596  | 10.033742 |
| H | 25.788187 | 7.064781  | 10.323393 |
| C | 30.737093 | 5.274243  | 3.558482  |
| C | 31.788649 | 2.721138  | 4.093931  |
| H | 32.197961 | 1.729776  | 4.303373  |
| C | 32.061063 | 4.959780  | 3.205302  |
| H | 32.685567 | 5.718959  | 2.728249  |
| C | 32.584499 | 3.693118  | 3.477838  |
| H | 33.618629 | 3.464900  | 3.208407  |
| C | 29.941936 | 4.289084  | 4.174891  |
| H | 28.902124 | 4.516429  | 4.421676  |
| C | 30.465326 | 3.021040  | 4.437054  |
| H | 29.834639 | 2.262040  | 4.906408  |
| C | 25.963725 | 8.010141  | 2.469266  |
| C | 25.423761 | 7.874558  | 3.775046  |
| C | 26.512821 | 6.844467  | 1.874136  |
| C | 25.461043 | 6.654353  | 4.452721  |
| H | 25.003418 | 8.765053  | 4.249783  |
| C | 26.550349 | 5.629246  | 2.558884  |
| H | 26.932894 | 6.934016  | 0.869096  |
| C | 26.030514 | 5.520774  | 3.856679  |
| H | 25.049818 | 6.590393  | 5.465081  |
| H | 27.002105 | 4.755579  | 2.079248  |
| H | 26.066830 | 4.568758  | 4.392230  |
| C | 29.568596 | 12.255280 | 1.388795  |
| C | 30.227302 | 12.874971 | 0.295258  |
| C | 30.334305 | 12.024273 | 2.562228  |
| C | 31.573489 | 13.237742 | 0.374872  |
| H | 29.648134 | 13.055839 | -0.614426 |
| C | 31.679528 | 12.389287 | 2.629676  |
| H | 29.840401 | 11.548519 | 3.412145  |
| C | 32.315947 | 12.999035 | 1.539603  |
| H | 32.052004 | 13.711945 | -0.487785 |
| H | 32.240570 | 12.194395 | 3.549152  |
| H | 33.369891 | 13.282170 | 1.596404  |

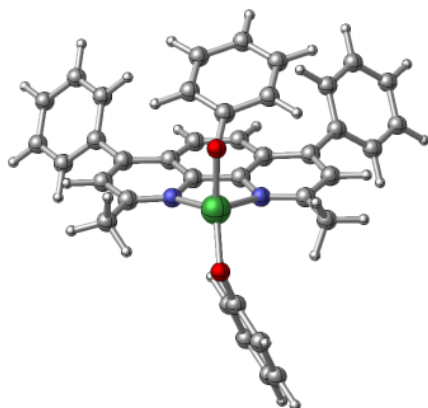

Zero-point correction= 0.578358 (Hartree/Particle)  
 Thermal correction to Energy= 0.614962  
 Thermal correction to Enthalpy= 0.615907  
 Thermal correction to Gibbs Free Energy= 0.504718  
 Sum of electronic and zero-point Energies= -3232.673099  
 Sum of electronic and thermal Energies= -3232.636495  
 Sum of electronic and thermal Enthalpies= -3232.635550  
 Sum of electronic and thermal Free Energies= -3232.746739

uB3LYP-d3/def2-tzvpp-CPCM(THF)//uB3LYP-d3/def2-svp-CPCM(THF)

E(scf) = -3235.331037 a.u.

uPBE0-d3/def2-tzvpp-CPCM(THF)//uB3LYP-d3/def2-svp-CPCM(THF)

E(scf) = -3232.996685 a.u.

uB3LYP-d3/def2-svp(Gas)//uB3LYP-d3/def2-svp-CPCM(THF)

E(scf) = -3233.228882 a.u.

DLPNO-CCSD(T)/def2-svp(Gas)//uB3LYP-d3/def2-svp-CPCM(THF)

E(scf) = -3227.028927 a.u.

### <sup>2</sup>(L4)NiOPh

E(scf) = -2926.54224132 a.u.

$\nu_{\min} = 10.41 \text{ cm}^{-1}$

|    |           |           |          |
|----|-----------|-----------|----------|
| Ni | -1.709606 | 6.421999  | 7.999223 |
| N  | -1.221997 | 5.991795  | 9.909291 |
| N  | 0.040975  | 7.253462  | 7.996570 |
| C  | 0.628380  | 7.892727  | 6.972781 |
| C  | -0.132175 | 7.912789  | 5.679290 |
| H  | 0.403117  | 8.451512  | 4.886451 |
| H  | -1.117473 | 8.382201  | 5.837737 |
| H  | -0.330407 | 6.880071  | 5.347673 |
| C  | 1.890605  | 8.493065  | 7.125177 |
| H  | 2.345512  | 8.980414  | 6.261210 |
| C  | 2.585432  | 8.450157  | 8.335760 |
| C  | 3.931114  | 9.070815  | 8.433248 |
| C  | 4.137741  | 10.385665 | 7.974617 |
| H  | 3.291470  | 10.957645 | 7.586596 |
| C  | 5.405340  | 10.970258 | 8.031023 |
| H  | 5.544490  | 11.995755 | 7.679834 |
| C  | 6.491110  | 10.248357 | 8.538450 |
| H  | 7.482879  | 10.705207 | 8.581517 |

Go to: [\[table of contents\]](#) [\[references\]](#)

|   |           |          |           |
|---|-----------|----------|-----------|
| C | 6.300946  | 8.936818 | 8.987528  |
| H | 7.145971  | 8.361580 | 9.373989  |
| C | 5.032929  | 8.352750 | 8.937117  |
| H | 4.897929  | 7.321523 | 9.270708  |
| C | 1.950036  | 7.794622 | 9.436148  |
| C | 2.473230  | 7.728056 | 10.774559 |
| H | 3.408191  | 8.240417 | 11.001004 |
| C | 1.816155  | 7.060137 | 11.772443 |
| H | 2.238923  | 7.049572 | 12.777056 |
| C | 0.564973  | 6.392243 | 11.536244 |
| C | -0.172662 | 5.651546 | 12.512104 |
| C | 0.334043  | 5.405967 | 13.887226 |
| C | 1.612499  | 4.858371 | 14.106252 |
| H | 2.249943  | 4.617476 | 13.252693 |
| C | 2.060822  | 4.595178 | 15.402915 |
| H | 3.052473  | 4.161715 | 15.554518 |
| C | 1.242488  | 4.878031 | 16.502089 |
| H | 1.595803  | 4.675048 | 17.516067 |
| C | -0.031333 | 5.418803 | 16.296369 |
| H | -0.675975 | 5.644096 | 17.149553 |
| C | -0.484077 | 5.676115 | 14.999938 |
| H | -1.476386 | 6.106255 | 14.844659 |
| C | -1.412951 | 5.142920 | 12.132976 |
| H | -1.999550 | 4.565348 | 12.849473 |
| C | -1.924856 | 5.324756 | 10.830023 |
| C | -3.270656 | 4.799400 | 10.426634 |
| H | -4.016718 | 5.610869 | 10.473960 |
| H | -3.603192 | 3.983524 | 11.082678 |
| H | -3.250700 | 4.467654 | 9.379136  |
| C | -0.009930 | 6.508706 | 10.247552 |
| C | 0.684876  | 7.205123 | 9.197497  |
| O | -3.389998 | 5.955475 | 7.292606  |
| C | -4.576948 | 6.429962 | 7.588969  |
| C | -4.778850 | 7.464813 | 8.544995  |
| C | -5.738663 | 5.910578 | 6.954264  |
| C | -6.056921 | 7.941036 | 8.842794  |
| H | -3.896314 | 7.875301 | 9.045272  |
| C | -7.011252 | 6.395655 | 7.257875  |
| H | -5.601698 | 5.113082 | 6.218354  |
| C | -7.188868 | 7.415346 | 8.204760  |
| H | -6.170866 | 8.737234 | 9.585628  |
| H | -7.881712 | 5.970469 | 6.747796  |
| H | -8.187637 | 7.791743 | 8.439474  |

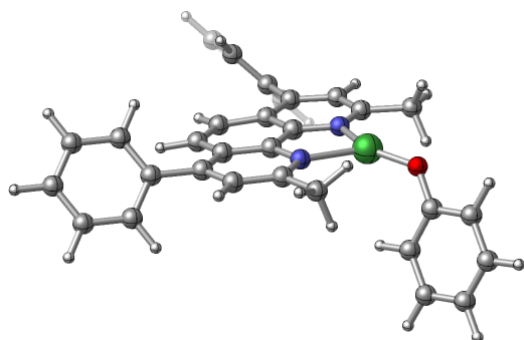

Zero-point correction= 0.483119 (Hartree/Particle)  
 Thermal correction to Energy= 0.513320  
 Thermal correction to Enthalpy= 0.514264  
 Thermal correction to Gibbs Free Energy= 0.418242  
 Sum of electronic and zero-point Energies= -2926.059123  
 Sum of electronic and thermal Energies= -2926.028922  
 Sum of electronic and thermal Enthalpies= -2926.027977  
 Sum of electronic and thermal Free Energies= -2926.123999

uB3LYP-d3/def2-tzvpp-CPCM(THF)//uB3LYP-d3/def2-svp-CPCM(THF)

E(scf) = -2928.295229 a.u.

uPBE0-d3/def2-tzvpp-CPCM(THF)//uB3LYP-d3/def2-svp-CPCM(THF)

E(scf) = -2926.315358 a.u.

uB3LYP-d3/def2-svp(Gas)//uB3LYP-d3/def2-svp-CPCM(THF)

E(scf) = -2926.526268 a.u.

DLPNO-CCSD(T)/def2-svp(Gas)//uB3LYP-d3/def2-svp-CPCM(THF)

E(scf) = -2921.173711 a.u.

### <sup>1</sup>(L4)Ni(OCOPh)<sub>2</sub>

E(scf) = -3459.80161236 a.u.

$\nu_{\min} = 9.97 \text{ cm}^{-1}$

|    |           |           |          |
|----|-----------|-----------|----------|
| Ni | 27.633444 | 10.654379 | 2.088851 |
| O  | 29.170309 | 12.128296 | 2.064745 |
| O  | 26.078090 | 7.940618  | 2.710161 |
| O  | 25.898415 | 9.911501  | 1.639556 |
| O  | 28.082334 | 11.578934 | 0.240122 |
| N  | 29.024445 | 8.983040  | 2.373335 |
| N  | 27.432132 | 10.332842 | 4.077956 |
| C  | 28.134813 | 9.288250  | 4.575538 |
| C  | 28.994235 | 8.564544  | 3.660683 |
| C  | 28.888568 | 7.827070  | 6.392217 |
| H  | 28.888831 | 7.570154  | 7.451125 |
| C  | 25.439109 | 8.782975  | 2.076998 |
| C  | 29.753188 | 7.464260  | 4.132797 |
| C  | 29.703147 | 7.145465  | 5.532809 |
| H  | 30.344203 | 6.352187  | 5.916616 |
| C  | 26.448642 | 10.691896 | 6.213130 |
| H  | 25.744929 | 11.261656 | 6.821460 |
| C  | 28.045591 | 8.896794  | 5.935224 |
| C  | 27.142434 | 9.624347  | 6.772864 |

Go to: [\[table of contents\]](#) [\[references\]](#)

|   |           |           |           |
|---|-----------|-----------|-----------|
| C | 26.915274 | 9.274765  | 8.199486  |
| C | 29.793857 | 8.357601  | 1.488433  |
| C | 26.606273 | 11.031814 | 4.854513  |
| C | 30.567639 | 7.237794  | 1.871688  |
| H | 31.162206 | 6.723659  | 1.114730  |
| C | 30.554140 | 6.762904  | 3.176414  |
| C | 27.014115 | 10.266567 | 9.192195  |
| H | 27.300560 | 11.282577 | 8.910317  |
| C | 29.005002 | 12.242274 | 0.811200  |
| C | 26.549953 | 7.969267  | 8.578178  |
| H | 26.444008 | 7.195111  | 7.815008  |
| C | 26.409670 | 8.655661  | 10.898817 |
| H | 26.215387 | 8.414515  | 11.946787 |
| C | 25.846654 | 12.152574 | 4.206734  |
| H | 25.190091 | 12.671982 | 4.916066  |
| H | 25.246603 | 11.749589 | 3.374795  |
| H | 26.552998 | 12.878533 | 3.771770  |
| C | 29.827598 | 8.878360  | 0.080350  |
| H | 30.135148 | 8.098324  | -0.629410 |
| H | 30.552705 | 9.707153  | 0.008589  |
| H | 28.850751 | 9.287730  | -0.206715 |
| C | 26.769169 | 9.957053  | 10.532416 |
| H | 26.860858 | 10.735880 | 11.293407 |
| C | 26.296486 | 7.664480  | 9.917599  |
| H | 26.004644 | 6.648630  | 10.194957 |
| C | 31.351540 | 5.558233  | 3.527435  |
| C | 32.864273 | 3.255859  | 4.110074  |
| H | 33.451586 | 2.363020  | 4.338270  |
| C | 32.715942 | 5.493618  | 3.191324  |
| H | 33.191709 | 6.351210  | 2.709644  |
| C | 33.467350 | 4.353045  | 3.485907  |
| H | 34.528806 | 4.322486  | 3.227978  |
| C | 30.753816 | 4.447736  | 4.152376  |
| H | 29.689571 | 4.473826  | 4.396815  |
| C | 31.504921 | 3.305157  | 4.438333  |
| H | 31.024298 | 2.447732  | 4.915766  |
| C | 23.976784 | 8.538133  | 1.758634  |
| C | 23.217170 | 9.468198  | 1.031435  |
| C | 23.367474 | 7.354818  | 2.204201  |
| C | 21.869413 | 9.219096  | 0.756227  |
| H | 23.699226 | 10.384475 | 0.686950  |
| C | 22.020549 | 7.104503  | 1.930949  |
| H | 23.972673 | 6.641469  | 2.767114  |
| C | 21.268378 | 8.037152  | 1.205751  |
| H | 21.284707 | 9.948277  | 0.189032  |
| H | 21.553978 | 6.180564  | 2.283015  |

Go to: [\[table of contents\]](#) [\[references\]](#)

|   |           |           |           |
|---|-----------|-----------|-----------|
| H | 20.214216 | 7.842553  | 0.990798  |
| C | 29.902628 | 13.123582 | 0.008666  |
| C | 29.748612 | 13.204344 | -1.384655 |
| C | 30.909231 | 13.868961 | 0.643234  |
| C | 30.594006 | 14.023649 | -2.135718 |
| H | 28.962155 | 12.617371 | -1.862326 |
| C | 31.752730 | 14.688799 | -0.109173 |
| H | 31.016485 | 13.793316 | 1.726806  |
| C | 31.595896 | 14.766599 | -1.498792 |
| H | 30.473290 | 14.084521 | -3.220146 |
| H | 32.535204 | 15.268704 | 0.386543  |
| H | 32.257013 | 15.408027 | -2.087350 |

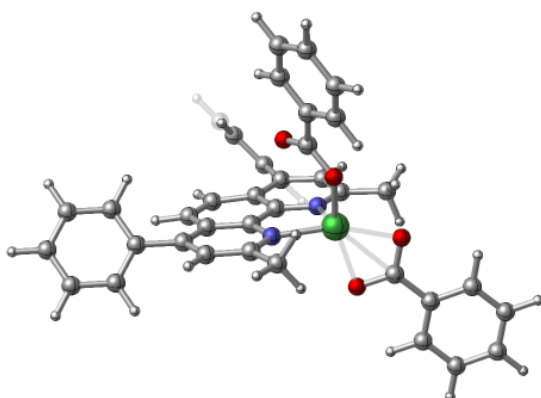

|                                              |                             |
|----------------------------------------------|-----------------------------|
| Zero-point correction=                       | 0.601455 (Hartree/Particle) |
| Thermal correction to Energy=                | 0.641446                    |
| Thermal correction to Enthalpy=              | 0.642390                    |
| Thermal correction to Gibbs Free Energy=     | 0.522765                    |
| Sum of electronic and zero-point Energies=   | -3459.200158                |
| Sum of electronic and thermal Energies=      | -3459.160166                |
| Sum of electronic and thermal Enthalpies=    | -3459.159222                |
| Sum of electronic and thermal Free Energies= | -3459.278847                |

### $^3(\text{L4})\text{Ni}(\text{OCOPh})_2$

E(scf) = -3459.82740075 a.u.

$v_{\text{min}} = 6.84 \text{ cm}^{-1}$

|    |           |           |          |
|----|-----------|-----------|----------|
| Ni | 27.901795 | 10.558482 | 1.723359 |
| O  | 29.023926 | 12.264842 | 2.203791 |
| O  | 26.605306 | 9.317307  | 0.641543 |
| O  | 26.090822 | 11.435987 | 0.908484 |
| O  | 28.989797 | 11.542689 | 0.129863 |
| N  | 29.141080 | 8.936589  | 2.196794 |
| N  | 27.356556 | 10.253356 | 3.716516 |
| C  | 28.004338 | 9.207468  | 4.288374 |
| C  | 28.955979 | 8.489028  | 3.464426 |
| C  | 28.580249 | 7.735122  | 6.165265 |
| H  | 28.480832 | 7.476835  | 7.219193 |
| C  | 25.828276 | 10.298659 | 0.422562 |
| C  | 29.645433 | 7.367961  | 3.995816 |

Go to: [\[table of contents\]](#) [\[references\]](#)

|   |           |           |           |
|---|-----------|-----------|-----------|
| C | 29.454360 | 7.038075  | 5.379995  |
| H | 30.039820 | 6.228761  | 5.815310  |
| C | 26.288824 | 10.692213 | 5.801944  |
| H | 25.589985 | 11.312560 | 6.365011  |
| C | 27.804126 | 8.822197  | 5.639224  |
| C | 26.870795 | 9.586584  | 6.407928  |
| C | 26.521347 | 9.248883  | 7.812475  |
| C | 29.953490 | 8.275711  | 1.370760  |
| C | 26.549848 | 11.019194 | 4.452618  |
| C | 30.660427 | 7.138024  | 1.819384  |
| H | 31.303955 | 6.609488  | 1.114664  |
| C | 30.526251 | 6.662760  | 3.117222  |
| C | 26.588100 | 10.235164 | 8.813339  |
| H | 26.939959 | 11.237505 | 8.557915  |
| C | 29.366603 | 12.392618 | 0.986522  |
| C | 26.073000 | 7.960331  | 8.158628  |
| H | 25.993382 | 7.190909  | 7.387443  |
| C | 25.786311 | 8.652135  | 10.464033 |
| H | 25.502920 | 8.419730  | 11.493504 |
| C | 25.942605 | 12.232253 | 3.814299  |
| H | 25.430959 | 12.860188 | 4.555247  |
| H | 25.236999 | 11.940154 | 3.023425  |
| H | 26.733842 | 12.809728 | 3.312602  |
| C | 30.061566 | 8.745082  | -0.049227 |
| H | 30.632135 | 8.035269  | -0.662074 |
| H | 30.535254 | 9.736015  | -0.094857 |
| H | 29.052117 | 8.875742  | -0.466871 |
| C | 26.228802 | 9.936587  | 10.130063 |
| H | 26.296529 | 10.710637 | 10.898398 |
| C | 25.705594 | 7.666658  | 9.473923  |
| H | 25.350556 | 6.664205  | 9.725156  |
| C | 31.278088 | 5.449985  | 3.534079  |
| C | 32.717058 | 3.135153  | 4.239529  |
| H | 33.275578 | 2.237335  | 4.515400  |
| C | 30.618144 | 4.338957  | 4.091751  |
| H | 29.535708 | 4.369086  | 4.234621  |
| C | 31.333103 | 3.190075  | 4.438644  |
| H | 30.805277 | 2.332113  | 4.862160  |
| C | 32.667686 | 5.379573  | 3.326718  |
| H | 33.190983 | 6.237318  | 2.897478  |
| C | 33.382029 | 4.232824  | 3.682744  |
| H | 34.462803 | 4.197667  | 3.525351  |
| C | 24.599330 | 10.101961 | -0.409657 |
| C | 23.744297 | 11.184418 | -0.670337 |
| C | 24.295566 | 8.835873  | -0.934450 |
| C | 22.597262 | 11.002200 | -1.446161 |

Go to: [\[table of contents\]](#) [\[references\]](#)

|   |           |           |           |
|---|-----------|-----------|-----------|
| H | 23.996046 | 12.162922 | -0.257200 |
| C | 23.148081 | 8.654065  | -1.709820 |
| H | 24.970900 | 8.004501  | -0.724493 |
| C | 22.297756 | 9.736841  | -1.966326 |
| H | 21.934184 | 11.847418 | -1.647438 |
| H | 22.914588 | 7.666750  | -2.116402 |
| H | 21.399934 | 9.594399  | -2.573516 |
| C | 30.220817 | 13.550061 | 0.571884  |
| C | 30.602070 | 13.698251 | -0.771083 |
| C | 30.644769 | 14.493013 | 1.521484  |
| C | 31.399337 | 14.777146 | -1.159811 |
| H | 30.262452 | 12.957575 | -1.497368 |
| C | 31.441904 | 15.571915 | 1.132170  |
| H | 30.339742 | 14.364842 | 2.561577  |
| C | 31.820161 | 15.714991 | -0.208625 |
| H | 31.693896 | 14.889315 | -2.206340 |
| H | 31.770009 | 16.304167 | 1.874294  |
| H | 32.443922 | 16.559571 | -0.513021 |

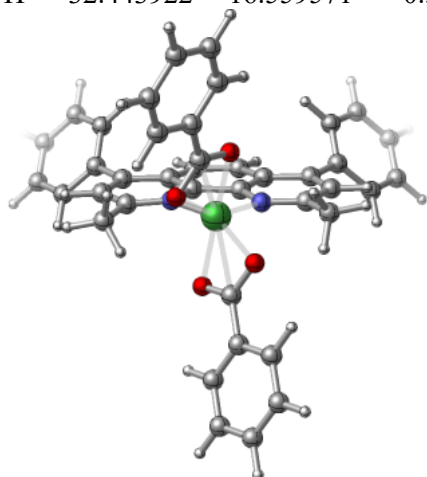

|                                              |                             |
|----------------------------------------------|-----------------------------|
| Zero-point correction=                       | 0.600606 (Hartree/Particle) |
| Thermal correction to Energy=                | 0.640562                    |
| Thermal correction to Enthalpy=              | 0.641506                    |
| Thermal correction to Gibbs Free Energy=     | 0.521562                    |
| Sum of electronic and zero-point Energies=   | -3459.226795                |
| Sum of electronic and thermal Energies=      | -3459.186839                |
| Sum of electronic and thermal Enthalpies=    | -3459.185894                |
| Sum of electronic and thermal Free Energies= | -3459.305839                |

uB3LYP-d3/def2-tzvpp-CPCM(THF)//uB3LYP-d3/def2-svp-CPCM(THF)

E(scf) = -3462.16232 a.u.

uPBE0-d3/def2-tzvpp-CPCM(THF)//uB3LYP-d3/def2-svp-CPCM(THF)

E(scf) = -3459.588565 a.u.

uB3LYP-d3/def2-svp(Gas)//uB3LYP-d3/def2-svp-CPCM(THF)

E(scf) = -3459.808254 a.u.

DLPNO-CCSD(T)/def2-svp(Gas)//uB3LYP-d3/def2-svp-CPCM(THF)

E(scf) = -3453.043998 a.u.

**<sup>2</sup>(L4)NiOCOPh**



E(scf) = -3039.82963458 a.u.

 $v_{\min} = 9.58 \text{ cm}^{-1}$ 

|    |           |           |           |
|----|-----------|-----------|-----------|
| Ni | 28.901699 | 10.207493 | 2.124374  |
| O  | 30.272463 | 11.462533 | 1.032586  |
| O  | 28.097780 | 11.786663 | 0.971025  |
| N  | 29.703318 | 8.428346  | 2.510697  |
| N  | 27.785337 | 9.771525  | 3.703900  |
| C  | 28.144488 | 8.595025  | 4.294135  |
| C  | 29.191257 | 7.856975  | 3.636844  |
| C  | 27.960233 | 6.793886  | 5.937701  |
| H  | 27.457840 | 6.355536  | 6.799940  |
| C  | 29.621238 | 6.605749  | 4.146927  |
| C  | 28.946582 | 6.087390  | 5.305986  |
| H  | 29.214113 | 5.096760  | 5.673555  |
| C  | 26.177407 | 10.078402 | 5.448922  |
| H  | 25.408447 | 10.716326 | 5.887977  |
| C  | 27.543175 | 8.090113  | 5.474826  |
| C  | 26.527429 | 8.886794  | 6.086069  |
| C  | 25.847578 | 8.501702  | 7.349337  |
| C  | 30.639356 | 7.766942  | 1.815712  |
| C  | 26.811536 | 10.504095 | 4.267555  |
| C  | 31.129440 | 6.525821  | 2.264550  |
| H  | 31.918416 | 6.036602  | 1.690867  |
| C  | 30.660777 | 5.931191  | 3.436494  |
| C  | 24.442317 | 8.523192  | 7.430748  |
| H  | 23.857955 | 8.783968  | 6.545063  |
| C  | 29.269480 | 12.109491 | 0.610996  |
| C  | 26.582682 | 8.156127  | 8.499853  |
| H  | 27.674315 | 8.161497  | 8.463833  |
| C  | 24.532474 | 7.848943  | 9.757296  |
| H  | 24.023120 | 7.593894  | 10.689891 |
| C  | 26.452926 | 11.794145 | 3.591562  |
| H  | 25.660848 | 12.332128 | 4.129062  |
| H  | 26.138952 | 11.604222 | 2.554596  |
| H  | 27.344933 | 12.434401 | 3.508180  |
| C  | 29.465098 | 13.268213 | -0.320611 |
| C  | 31.121749 | 8.405080  | 0.546468  |
| H  | 31.963861 | 7.855868  | 0.104724  |
| H  | 31.400294 | 9.452932  | 0.727555  |
| H  | 30.296046 | 8.436305  | -0.184636 |
| C  | 23.791017 | 8.195500  | 8.622510  |
| H  | 22.698975 | 8.208041  | 8.663674  |
| C  | 25.930174 | 7.834093  | 9.692429  |
| H  | 26.517485 | 7.576381  | 10.577326 |
| C  | 28.539362 | 15.071654 | -1.658334 |
| H  | 27.674038 | 15.632453 | -2.020997 |

Go to: [\[table of contents\]](#) [\[references\]](#)

|   |           |           |           |
|---|-----------|-----------|-----------|
| C | 30.938111 | 14.715833 | -1.598579 |
| H | 31.945507 | 14.998851 | -1.914587 |
| C | 31.244615 | 4.643289  | 3.892007  |
| C | 28.357752 | 13.992770 | -0.789891 |
| H | 27.360382 | 13.694582 | -0.461738 |
| C | 29.829826 | 15.434491 | -2.063979 |
| H | 29.972012 | 16.278777 | -2.743750 |
| C | 32.418072 | 2.214080  | 4.711511  |
| H | 32.870989 | 1.271946  | 5.030039  |
| C | 30.756403 | 13.636960 | -0.730053 |
| H | 31.607394 | 13.064870 | -0.356117 |
| C | 31.366133 | 3.564862  | 2.995646  |
| H | 30.988649 | 3.669845  | 1.975665  |
| C | 31.943445 | 2.359719  | 3.403468  |
| H | 32.020075 | 1.529740  | 2.696629  |
| C | 31.730026 | 4.485987  | 5.204495  |
| H | 31.668723 | 5.321357  | 5.905467  |
| C | 32.312631 | 3.282430  | 5.608989  |
| H | 32.691426 | 3.181181  | 6.629092  |

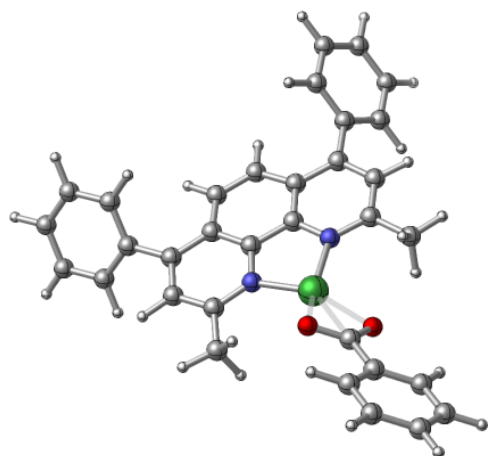

Zero-point correction= 0.493529 (Hartree/Particle)  
Thermal correction to Energy= 0.525787  
Thermal correction to Enthalpy= 0.526732  
Thermal correction to Gibbs Free Energy= 0.425175  
Sum of electronic and zero-point Energies= -3039.336105  
Sum of electronic and thermal Energies= -3039.303847  
Sum of electronic and thermal Enthalpies= -3039.302903  
Sum of electronic and thermal Free Energies= -3039.404459

uB3LYP-d3/def2-tzvpp-CPCM(THF)//uB3LYP-d3/def2-svp-CPCM(THF)

E(scf) = -3041.708996 a.u.

uPBE0-d3/def2-tzvpp-CPCM(THF)//uB3LYP-d3/def2-svp-CPCM(THF)

E(scf) = -3039.609392 a.u.

uB3LYP-d3/def2-svp(Gas)//uB3LYP-d3/def2-svp-CPCM(THF)

E(scf) = -3039.81703 a.u.

DLPNO-CCSD(T)/def2-svp(Gas)//uB3LYP-d3/def2-svp-CPCM(THF)

E(scf) = -3034.180815 a.u.

**<sup>1</sup>(L4)Ni(OPiv)<sub>2</sub>**

E(scf) -3312.31321831 a.u.

v<sub>min</sub> = 6.65cm<sup>-1</sup>

|    |           |           |           |
|----|-----------|-----------|-----------|
| Ni | 28.338035 | 11.001336 | 1.702438  |
| O  | 29.404960 | 12.825196 | 1.816956  |
| O  | 27.163064 | 9.436201  | 1.124986  |
| O  | 25.958685 | 11.282085 | 1.145155  |
| O  | 29.063112 | 11.862625 | -0.120447 |
| N  | 29.751949 | 9.451583  | 2.373265  |
| N  | 27.734787 | 10.700492 | 3.652756  |
| C  | 28.127911 | 9.495328  | 4.136061  |
| C  | 29.210020 | 8.821903  | 3.443698  |
| C  | 28.070464 | 7.661561  | 5.761378  |
| H  | 27.666754 | 7.232759  | 6.678296  |
| C  | 26.033270 | 10.035983 | 1.081645  |
| C  | 29.673924 | 7.566863  | 3.916332  |
| C  | 29.084482 | 7.020395  | 5.106470  |
| H  | 29.476833 | 6.086974  | 5.509274  |
| C  | 26.200890 | 10.911826 | 5.458544  |
| H  | 25.429491 | 11.508932 | 5.947395  |
| C  | 27.546737 | 8.912091  | 5.288898  |
| C  | 26.502918 | 9.644710  | 5.939836  |
| C  | 25.745314 | 9.097111  | 7.094388  |
| C  | 30.775607 | 8.903675  | 1.725686  |
| C  | 26.832027 | 11.430744 | 4.306057  |
| C  | 24.773044 | 9.155943  | 1.074172  |
| C  | 31.288876 | 7.647409  | 2.122122  |
| H  | 32.107645 | 7.207738  | 1.550363  |
| C  | 30.744202 | 6.950215  | 3.193067  |
| C  | 25.598229 | 9.852754  | 8.271458  |
| H  | 26.085251 | 10.827711 | 8.349179  |
| C  | 29.541467 | 12.825052 | 0.554616  |
| C  | 25.117361 | 7.840119  | 7.010694  |
| H  | 25.203438 | 7.254417  | 6.092642  |
| C  | 24.234450 | 8.105698  | 9.252305  |
| H  | 23.649426 | 7.719893  | 10.090775 |
| C  | 26.481934 | 12.782820 | 3.760103  |
| H  | 26.073497 | 13.435155 | 4.543912  |
| H  | 25.738452 | 12.664553 | 2.956871  |
| H  | 27.369907 | 13.246320 | 3.306549  |
| C  | 30.291846 | 13.951200 | -0.160423 |
| C  | 31.360094 | 9.664285  | 0.571400  |
| H  | 32.031255 | 9.039152  | -0.032109 |
| H  | 31.936115 | 10.525251 | 0.950485  |
| H  | 30.559658 | 10.078532 | -0.057391 |
| C  | 24.853134 | 9.357113  | 9.344447  |
| H  | 24.756769 | 9.950864  | 10.256732 |

Go to: [\[table of contents\]](#) [\[references\]](#)

|   |           |           |           |
|---|-----------|-----------|-----------|
| C | 24.365243 | 7.350942  | 8.081202  |
| H | 23.875503 | 6.377655  | 7.998062  |
| C | 31.281426 | 5.609440  | 3.544800  |
| C | 32.331101 | 3.063450  | 4.132256  |
| H | 32.737936 | 2.075658  | 4.362247  |
| C | 30.432077 | 4.492480  | 3.654860  |
| H | 29.358512 | 4.612383  | 3.493157  |
| C | 30.954571 | 3.229536  | 3.943560  |
| H | 30.283203 | 2.370474  | 4.016808  |
| C | 32.664822 | 5.429128  | 3.725176  |
| H | 33.333468 | 6.289681  | 3.646684  |
| C | 33.184381 | 4.166587  | 4.022276  |
| H | 34.260257 | 4.044995  | 4.170003  |
| C | 30.659858 | 15.068152 | 0.824668  |
| H | 31.205056 | 15.869469 | 0.300573  |
| H | 29.759417 | 15.504421 | 1.283253  |
| H | 31.296581 | 14.686653 | 1.636500  |
| C | 31.568009 | 13.336636 | -0.773384 |
| H | 32.228202 | 12.929644 | 0.009551  |
| H | 31.315642 | 12.522189 | -1.468407 |
| H | 32.130087 | 14.106810 | -1.325666 |
| C | 29.386833 | 14.497183 | -1.282038 |
| H | 28.463117 | 14.932982 | -0.868085 |
| H | 29.913878 | 15.284382 | -1.844742 |
| H | 29.104163 | 13.695042 | -1.978953 |
| C | 24.957289 | 7.980343  | 0.100529  |
| H | 25.855486 | 7.400759  | 0.356525  |
| H | 24.082240 | 7.311037  | 0.138356  |
| H | 25.067055 | 8.338506  | -0.936119 |
| C | 24.632088 | 8.623290  | 2.519232  |
| H | 25.517054 | 8.035815  | 2.807619  |
| H | 24.527264 | 9.452485  | 3.237650  |
| H | 23.740826 | 7.980553  | 2.605922  |
| C | 23.537827 | 9.981699  | 0.694782  |
| H | 23.636167 | 10.397612 | -0.320409 |
| H | 22.633896 | 9.351620  | 0.722591  |
| H | 23.399007 | 10.823661 | 1.388045  |

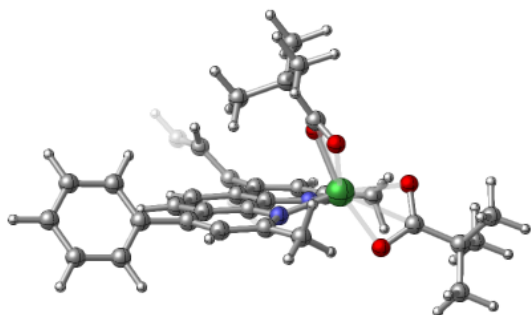

Zero-point correction= 0.662136 (Hartree/Particle)  
 Thermal correction to Energy= 0.704223  
 Thermal correction to Enthalpy= 0.705167  
 Thermal correction to Gibbs Free Energy= 0.582238  
 Sum of electronic and zero-point Energies= -3311.651082  
 Sum of electronic and thermal Energies= -3311.608995  
 Sum of electronic and thermal Enthalpies= -3311.608051  
 Sum of electronic and thermal Free Energies= -3311.730980

**<sup>3</sup>(L4)Ni(OPiv)<sub>2</sub>**

E(scf) -3312.33654687 a.u.

$\nu_{\min} = 9.85 \text{ cm}^{-1}$

|    |           |           |           |
|----|-----------|-----------|-----------|
| Ni | 27.203311 | 10.275234 | 1.625312  |
| O  | 28.550085 | 11.594648 | 2.536029  |
| O  | 25.841311 | 9.447199  | 0.274204  |
| O  | 25.659597 | 11.549050 | 0.865136  |
| O  | 28.677520 | 11.284869 | 0.368861  |
| N  | 28.529986 | 8.713351  | 1.953800  |
| N  | 26.592263 | 9.650694  | 3.560266  |
| C  | 27.612217 | 8.969250  | 4.145192  |
| C  | 28.661048 | 8.467353  | 3.279573  |
| C  | 28.841768 | 8.061643  | 6.065578  |
| H  | 28.940757 | 7.948912  | 7.144866  |
| C  | 25.256625 | 10.571130 | 0.172386  |
| C  | 29.744723 | 7.731378  | 3.819899  |
| C  | 29.829315 | 7.591265  | 5.246292  |
| H  | 30.704273 | 7.108271  | 5.680496  |
| C  | 25.558726 | 9.860426  | 5.700991  |
| H  | 24.701925 | 10.211675 | 6.277776  |
| C  | 27.677691 | 8.719344  | 5.540082  |
| C  | 26.585732 | 9.179559  | 6.341073  |
| C  | 26.509968 | 8.949671  | 7.807746  |
| C  | 29.396771 | 8.200047  | 1.083364  |
| C  | 25.578546 | 10.088771 | 4.306622  |
| C  | 24.066882 | 10.709777 | -0.783293 |
| C  | 30.498834 | 7.443278  | 1.542055  |
| H  | 31.190862 | 7.025358  | 0.809219  |
| C  | 30.702180 | 7.204937  | 2.895088  |
| C  | 26.266999 | 10.029317 | 8.676268  |

Go to: [\[table of contents\]](#) [\[references\]](#)

|   |           |           |           |
|---|-----------|-----------|-----------|
| H | 26.177593 | 11.038318 | 8.266787  |
| C | 29.151841 | 11.773526 | 1.432156  |
| C | 26.628099 | 7.656205  | 8.349930  |
| H | 26.791614 | 6.804728  | 7.685685  |
| C | 26.282161 | 8.533634  | 10.583047 |
| H | 26.196029 | 8.372088  | 11.660362 |
| C | 24.446230 | 10.797409 | 3.624120  |
| H | 23.736872 | 11.216567 | 4.349310  |
| H | 23.906297 | 10.089558 | 2.973319  |
| H | 24.827240 | 11.588294 | 2.964361  |
| C | 30.516369 | 12.473224 | 1.428110  |
| C | 29.169890 | 8.440293  | -0.380185 |
| H | 29.573392 | 7.612850  | -0.980629 |
| H | 29.661384 | 9.377363  | -0.682930 |
| H | 28.096978 | 8.567761  | -0.578988 |
| C | 26.160123 | 9.822931  | 10.053959 |
| H | 25.982159 | 10.673471 | 10.716530 |
| C | 26.511920 | 7.451017  | 9.726814  |
| H | 26.596923 | 6.439694  | 10.131873 |
| C | 31.883499 | 6.412841  | 3.327821  |
| C | 34.137592 | 4.897641  | 4.067655  |
| H | 35.012552 | 4.310370  | 4.356979  |
| C | 31.741638 | 5.262494  | 4.125787  |
| H | 30.746420 | 4.945596  | 4.445447  |
| C | 32.861038 | 4.510026  | 4.489767  |
| H | 32.734387 | 3.614102  | 5.102451  |
| C | 33.169848 | 6.787190  | 2.898945  |
| H | 33.290707 | 7.681288  | 2.282505  |
| C | 34.288851 | 6.037976  | 3.271476  |
| H | 35.282820 | 6.347508  | 2.939301  |
| C | 30.545442 | 13.584449 | 2.488896  |
| H | 31.544762 | 14.047385 | 2.529353  |
| H | 29.812881 | 14.373795 | 2.254813  |
| H | 30.303066 | 13.182123 | 3.482608  |
| C | 31.540677 | 11.372446 | 1.791927  |
| H | 31.314346 | 10.936944 | 2.777639  |
| H | 31.527836 | 10.559088 | 1.048819  |
| H | 32.558671 | 11.793753 | 1.822326  |
| C | 30.829955 | 13.044649 | 0.038688  |
| H | 30.092210 | 13.810225 | -0.250144 |
| H | 31.827911 | 13.512348 | 0.035979  |
| H | 30.811578 | 12.255329 | -0.726230 |
| C | 22.977266 | 9.721181  | -0.320164 |
| H | 22.623091 | 9.969221  | 0.693933  |
| H | 22.111862 | 9.761926  | -1.001247 |
| H | 23.365708 | 8.692326  | -0.305997 |

Go to: [\[table of contents\]](#) [\[references\]](#)

|   |           |           |           |
|---|-----------|-----------|-----------|
| C | 23.524438 | 12.144262 | -0.770297 |
| H | 23.186267 | 12.430578 | 0.236904  |
| H | 24.298464 | 12.862978 | -1.078542 |
| H | 22.671154 | 12.233064 | -1.461959 |
| C | 24.547711 | 10.329597 | -2.197971 |
| H | 24.949240 | 9.305870  | -2.210444 |
| H | 23.710782 | 10.387881 | -2.912609 |
| H | 25.339907 | 11.013529 | -2.543594 |

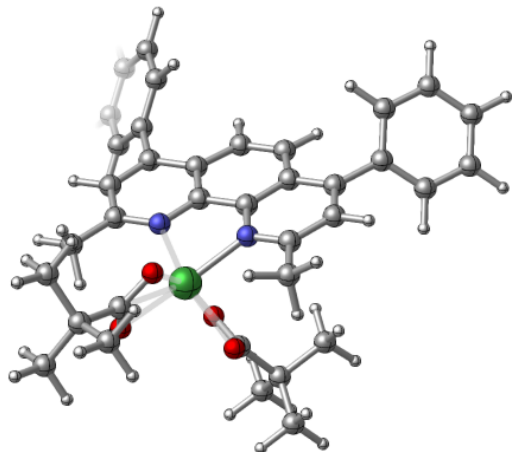

|                                              |                             |
|----------------------------------------------|-----------------------------|
| Zero-point correction=                       | 0.661116 (Hartree/Particle) |
| Thermal correction to Energy=                | 0.703206                    |
| Thermal correction to Enthalpy=              | 0.704150                    |
| Thermal correction to Gibbs Free Energy=     | 0.581160                    |
| Sum of electronic and zero-point Energies=   | -3311.675430                |
| Sum of electronic and thermal Energies=      | -3311.633341                |
| Sum of electronic and thermal Enthalpies=    | -3311.632397                |
| Sum of electronic and thermal Free Energies= | -3311.755387                |

uB3LYP-d3/def2-tzvpp-CPCM(THF)//uB3LYP-d3/def2-svp-CPCM(THF)

E(scf) = -3314.524524 a.u.

uPBE0-d3/def2-tzvpp-CPCM(THF)//uB3LYP-d3/def2-svp-CPCM(THF)

E(scf) = -3312.104744 a.u.

uB3LYP-d3/def2-svp(Gas)//uB3LYP-d3/def2-svp-CPCM(THF)

E(scf) = -3312.318693 a.u.

DLPNO-CCSD(T)/def2-svp(Gas)//uB3LYP-d3/def2-svp-CPCM(THF)

E(scf) = -3305.974303 a.u.

### <sup>2</sup>(L4)NiOPiv

E(scf) = -2966.08358777 a.u.

$\nu_{\min} = 12.42 \text{ cm}^{-1}$

|    |           |           |          |
|----|-----------|-----------|----------|
| Ni | 28.664629 | 10.436752 | 2.608230 |
| O  | 28.799298 | 12.545255 | 2.389891 |
| O  | 28.756263 | 11.240073 | 0.625613 |
| N  | 29.415052 | 8.608052  | 2.738129 |
| N  | 27.744566 | 9.910054  | 4.290176 |
| C  | 28.079106 | 8.653740  | 4.701184 |
| C  | 28.998688 | 7.942144  | 3.853919 |
| C  | 27.946593 | 6.688653  | 6.149476 |
| H  | 27.504839 | 6.178559  | 7.005461 |

Go to: [\[table of contents\]](#) [\[references\]](#)

|   |           |           |           |
|---|-----------|-----------|-----------|
| C | 29.417452 | 6.629494  | 4.189505  |
| C | 28.829928 | 6.016260  | 5.350255  |
| H | 29.079118 | 4.980887  | 5.582459  |
| C | 26.302000 | 10.080307 | 6.189576  |
| H | 25.606361 | 10.695131 | 6.763261  |
| C | 27.560738 | 8.046041  | 5.872972  |
| C | 26.652445 | 8.814527  | 6.662595  |
| C | 26.077645 | 8.322049  | 7.940794  |
| C | 30.281492 | 8.001653  | 1.910773  |
| C | 26.851273 | 10.608699 | 5.006661  |
| C | 30.753392 | 6.704775  | 2.181763  |
| H | 31.473692 | 6.256750  | 1.495112  |
| C | 30.353369 | 5.996170  | 3.316522  |
| C | 26.901821 | 7.823638  | 8.968186  |
| H | 27.983664 | 7.788601  | 8.821981  |
| C | 28.808330 | 12.398008 | 1.130668  |
| C | 24.689706 | 8.390484  | 8.165418  |
| H | 24.036652 | 8.769180  | 7.375486  |
| C | 24.969433 | 7.463212  | 10.387447 |
| H | 24.539990 | 7.128247  | 11.334868 |
| C | 26.465915 | 11.960375 | 4.481634  |
| H | 25.828768 | 12.508645 | 5.188335  |
| H | 25.920589 | 11.843077 | 3.529744  |
| H | 27.363106 | 12.547071 | 4.239149  |
| C | 28.859484 | 13.645587 | 0.236522  |
| C | 30.742740 | 8.785271  | 0.717541  |
| H | 31.384641 | 8.187265  | 0.057050  |
| H | 31.301545 | 9.674963  | 1.052637  |
| H | 29.879990 | 9.175083  | 0.159262  |
| C | 26.351873 | 7.399811  | 10.180433 |
| H | 27.007842 | 7.023603  | 10.969449 |
| C | 24.140523 | 7.960646  | 9.376026  |
| H | 23.059540 | 8.011833  | 9.528481  |
| C | 30.908779 | 4.642084  | 3.570250  |
| C | 32.024884 | 2.087815  | 3.999599  |
| H | 32.455458 | 1.097449  | 4.166962  |
| C | 30.899527 | 3.671743  | 2.550336  |
| H | 30.442339 | 3.910865  | 1.587151  |
| C | 31.448455 | 2.405047  | 2.764818  |
| H | 31.422918 | 1.661449  | 1.964297  |
| C | 31.496800 | 4.312294  | 4.806760  |
| H | 31.539175 | 5.061602  | 5.600285  |
| C | 32.050271 | 3.047089  | 5.017982  |
| H | 32.509527 | 2.811997  | 5.981431  |
| C | 27.548255 | 14.426450 | 0.463670  |
| C | 30.058821 | 14.507773 | 0.674097  |



Go to: [\[table of contents\]](#) [\[references\]](#)

|   |           |           |           |
|---|-----------|-----------|-----------|
| C | 28.994300 | 13.252604 | -1.239798 |
| H | 26.673337 | 13.824095 | 0.168982  |
| H | 27.436244 | 14.698026 | 1.523834  |
| H | 27.544023 | 15.350222 | -0.137833 |
| H | 29.979771 | 14.767986 | 1.739485  |
| H | 30.097516 | 15.438367 | 0.084552  |
| H | 31.009017 | 13.969594 | 0.523073  |
| H | 28.148129 | 12.627607 | -1.561239 |
| H | 29.024010 | 14.153969 | -1.873629 |
| H | 29.916397 | 12.676757 | -1.412605 |

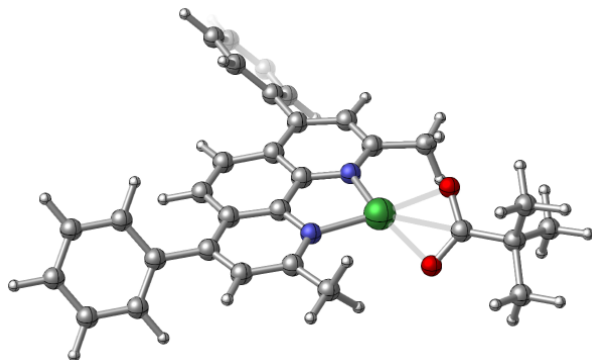

|                                              |                             |
|----------------------------------------------|-----------------------------|
| Zero-point correction=                       | 0.523732 (Hartree/Particle) |
| Thermal correction to Energy=                | 0.557062                    |
| Thermal correction to Enthalpy=              | 0.558006                    |
| Thermal correction to Gibbs Free Energy=     | 0.455093                    |
| Sum of electronic and zero-point Energies=   | -2965.559855                |
| Sum of electronic and thermal Energies=      | -2965.526526                |
| Sum of electronic and thermal Enthalpies=    | -2965.525582                |
| Sum of electronic and thermal Free Energies= | -2965.628495                |

uB3LYP-d3/def2-tzvpp-CPCM(THF)//uB3LYP-d3/def2-svp-CPCM(THF)

E(scf) = -2967.888984 a.u.

uPBE0-d3/def2-tzvpp-CPCM(THF)//uB3LYP-d3/def2-svp-CPCM(THF)

E(scf) = -2965.866383 a.u.

uB3LYP-d3/def2-svp(Gas)//uB3LYP-d3/def2-svp-CPCM(THF)

E(scf) = -2966.07232 a.u.

DLPNO-CCSD(T)/def2-svp(Gas)//uB3LYP-d3/def2-svp-CPCM(THF)

E(scf) = -2960.645927 a.u.

**<sup>3</sup>(L4)Ni(OCO-*p*-OHPH)<sub>2</sub>**

E(scf) = -3610.16954552 a.u.

$\nu_{\min} = 6.08 \text{ cm}^{-1}$

|    |           |           |           |
|----|-----------|-----------|-----------|
| Ni | 28.290787 | 10.664182 | 1.671710  |
| O  | 29.507813 | 12.368102 | 1.747440  |
| O  | 26.880351 | 9.273492  | 1.003275  |
| O  | 26.373431 | 11.411571 | 0.962333  |
| O  | 29.167237 | 11.339112 | -0.162670 |
| N  | 29.518756 | 9.072038  | 2.354698  |
| N  | 27.698389 | 10.563050 | 3.653896  |
| C  | 28.063339 | 9.394789  | 4.235612  |
| C  | 29.036633 | 8.585614  | 3.528830  |
| C  | 28.072918 | 7.759710  | 6.062772  |

Go to: [\[table of contents\]](#) [\[references\]](#)

|   |           |           |           |
|---|-----------|-----------|-----------|
| H | 27.744744 | 7.461599  | 7.058186  |
| C | 26.054567 | 10.205673 | 0.745383  |
| C | 29.471788 | 7.359614  | 4.096171  |
| C | 28.973513 | 6.983502  | 5.389211  |
| H | 29.351104 | 6.073635  | 5.854875  |
| C | 26.384742 | 11.083420 | 5.569614  |
| H | 25.714794 | 11.789315 | 6.063077  |
| C | 27.576355 | 8.984015  | 5.502419  |
| C | 26.662368 | 9.861783  | 6.168809  |
| C | 26.026380 | 9.518194  | 7.467445  |
| C | 30.456372 | 8.391272  | 1.695266  |
| C | 26.916949 | 11.423330 | 4.305213  |
| C | 30.922819 | 7.149331  | 2.182534  |
| H | 31.663576 | 6.602304  | 1.597558  |
| C | 30.434836 | 6.600164  | 3.360052  |
| C | 26.078565 | 10.424215 | 8.542293  |
| H | 26.627212 | 11.362202 | 8.428774  |
| C | 29.695777 | 12.287283 | 0.491085  |
| C | 25.322396 | 8.310484  | 7.632019  |
| H | 25.253406 | 7.607805  | 6.798591  |
| C | 24.757978 | 8.920365  | 9.909167  |
| H | 24.267192 | 8.687270  | 10.857291 |
| C | 26.612775 | 12.741191 | 3.656898  |
| H | 26.271937 | 13.478068 | 4.396701  |
| H | 25.837425 | 12.606974 | 2.887606  |
| H | 27.505573 | 13.111961 | 3.132829  |
| C | 31.007068 | 8.972011  | 0.426652  |
| H | 31.648082 | 8.251796  | -0.098147 |
| H | 31.604379 | 9.869535  | 0.657551  |
| H | 30.195463 | 9.309988  | -0.230570 |
| C | 25.453683 | 10.124322 | 9.755406  |
| H | 25.512369 | 10.833867 | 10.584390 |
| C | 24.690951 | 8.016700  | 8.842887  |
| H | 24.140317 | 7.079163  | 8.951988  |
| C | 30.923201 | 5.269958  | 3.808336  |
| C | 31.872325 | 2.733108  | 4.577413  |
| H | 32.240357 | 1.749049  | 4.877962  |
| C | 30.023855 | 4.231307  | 4.114314  |
| H | 28.948725 | 4.406980  | 4.035150  |
| C | 30.496247 | 2.972456  | 4.492896  |
| H | 29.785520 | 2.173687  | 4.718496  |
| C | 32.304563 | 5.015145  | 3.885458  |
| H | 33.012332 | 5.814984  | 3.655080  |
| C | 32.774732 | 3.757781  | 4.272771  |
| H | 33.850730 | 3.578797  | 4.338267  |
| C | 24.708162 | 9.871197  | 0.198733  |

Go to: [\[table of contents\]](#) [\[references\]](#)

|   |           |           |           |
|---|-----------|-----------|-----------|
| C | 24.327260 | 8.532519  | 0.000447  |
| C | 23.798463 | 10.888998 | -0.127929 |
| C | 23.071287 | 8.215115  | -0.507331 |
| C | 22.538271 | 10.583859 | -0.638617 |
| C | 22.166775 | 9.241788  | -0.831222 |
| H | 22.765950 | 7.178351  | -0.663797 |
| H | 21.834740 | 11.382225 | -0.892160 |
| C | 30.542845 | 13.296348 | -0.202903 |
| C | 30.780539 | 13.199111 | -1.585417 |
| C | 31.121440 | 14.357618 | 0.511165  |
| C | 31.575418 | 14.134254 | -2.240126 |
| C | 31.918315 | 15.301200 | -0.133978 |
| C | 32.150834 | 15.193836 | -1.516431 |
| H | 31.766680 | 14.067132 | -3.313149 |
| H | 32.365200 | 16.126501 | 0.428025  |
| O | 20.958300 | 8.880998  | -1.322892 |
| O | 32.915990 | 16.076200 | -2.199606 |
| H | 25.037008 | 7.742773  | 0.253537  |
| H | 24.095935 | 11.928374 | 0.022611  |
| H | 30.937081 | 14.432932 | 1.584284  |
| H | 30.328797 | 12.373371 | -2.138087 |
| H | 20.425386 | 9.667417  | -1.509407 |
| H | 33.257598 | 16.755953 | -1.600907 |

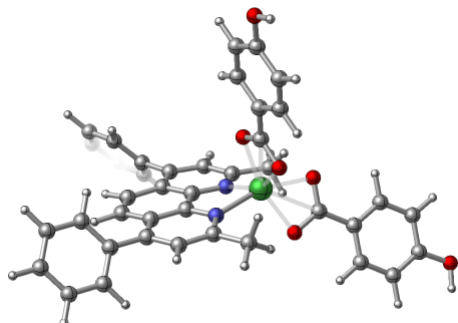

|                                              |                             |
|----------------------------------------------|-----------------------------|
| Zero-point correction=                       | 0.608915 (Hartree/Particle) |
| Thermal correction to Energy=                | 0.651240                    |
| Thermal correction to Enthalpy=              | 0.652185                    |
| Thermal correction to Gibbs Free Energy=     | 0.526768                    |
| Sum of electronic and zero-point Energies=   | -3609.560631                |
| Sum of electronic and thermal Energies=      | -3609.518305                |
| Sum of electronic and thermal Enthalpies=    | -3609.517361                |
| Sum of electronic and thermal Free Energies= | -3609.642777                |

uB3LYP-d3/def2-tzvpp-CPCM(THF)//uB3LYP-d3/def2-svp-CPCM(THF)

E(scf) = -3612.688186 a.u.

uPBE0-d3/def2-tzvpp-CPCM(THF)//uB3LYP-d3/def2-svp-CPCM(THF)

E(scf) = -3609.985964 a.u.

<sup>3</sup>(L4)Ni(OCO-*p*-OMePh)<sub>2</sub>

E(scf) = -3688.71747657 a.u.

$\nu_{\min} = 6.54 \text{ cm}^{-1}$

Go to: [\[table of contents\]](#) [\[references\]](#)

|    |           |           |           |
|----|-----------|-----------|-----------|
| Ni | 28.294932 | 10.668829 | 1.675936  |
| O  | 29.513196 | 12.371225 | 1.755725  |
| O  | 26.885517 | 9.278919  | 1.005649  |
| O  | 26.376769 | 11.416575 | 0.965883  |
| O  | 29.173100 | 11.346790 | -0.156871 |
| N  | 29.520563 | 9.074492  | 2.357852  |
| N  | 27.701038 | 10.566008 | 3.657489  |
| C  | 28.064161 | 9.396640  | 4.238055  |
| C  | 29.036625 | 8.586948  | 3.530738  |
| C  | 28.070224 | 7.759096  | 6.062983  |
| H  | 27.741197 | 7.460198  | 7.057881  |
| C  | 26.058901 | 10.210606 | 0.748374  |
| C  | 29.469050 | 7.359174  | 4.096287  |
| C  | 28.969519 | 6.982103  | 5.388575  |
| H  | 29.345164 | 6.070810  | 5.853031  |
| C  | 26.387470 | 11.086183 | 5.573267  |
| H  | 25.718392 | 11.792497 | 6.067305  |
| C  | 27.575999 | 8.985048  | 5.504139  |
| C  | 26.663236 | 9.863523  | 6.171265  |
| C  | 26.026589 | 9.519660  | 7.469515  |
| C  | 30.457249 | 8.393071  | 1.697819  |
| C  | 26.920429 | 11.426639 | 4.309334  |
| C  | 30.920629 | 7.149160  | 2.183000  |
| H  | 31.660432 | 6.601534  | 1.597375  |
| C  | 30.430717 | 6.598889  | 3.359220  |
| C  | 26.080348 | 10.424504 | 8.545278  |
| H  | 26.630614 | 11.361654 | 8.432686  |
| C  | 29.701628 | 12.293325 | 0.499275  |
| C  | 25.320521 | 8.313008  | 7.632879  |
| H  | 25.250297 | 7.611295  | 6.798740  |
| C  | 24.757184 | 8.921567  | 9.910657  |
| H  | 24.266006 | 8.688365  | 10.858552 |
| C  | 26.618109 | 12.745356 | 3.661931  |
| H  | 26.275712 | 13.481509 | 4.401719  |
| H  | 25.844655 | 12.612113 | 2.890552  |
| H  | 27.512293 | 13.116465 | 3.140425  |
| C  | 31.010080 | 8.975342  | 0.430829  |
| H  | 31.649780 | 8.254855  | -0.095200 |
| H  | 31.609316 | 9.870959  | 0.664167  |
| H  | 30.199677 | 9.316681  | -0.226158 |
| C  | 25.454956 | 10.124479 | 9.758096  |
| H  | 25.514875 | 10.833094 | 10.587788 |
| C  | 24.688588 | 8.019096  | 8.843465  |
| H  | 24.136335 | 7.082402  | 8.951629  |
| C  | 30.915425 | 5.266548  | 3.805119  |
| C  | 31.857302 | 2.725562  | 4.569477  |

Go to: [\[table of contents\]](#) [\[references\]](#)

|   |           |           |           |
|---|-----------|-----------|-----------|
| H | 32.222526 | 1.739896  | 4.868186  |
| C | 30.013128 | 4.229799  | 4.108879  |
| H | 28.938509 | 4.408620  | 4.029804  |
| C | 30.481915 | 2.968905  | 4.485124  |
| H | 29.768908 | 2.171686  | 4.709009  |
| C | 32.296052 | 5.007739  | 3.882062  |
| H | 33.006102 | 5.806044  | 3.653391  |
| C | 32.762624 | 3.748314  | 4.267030  |
| H | 33.838103 | 3.566198  | 4.332413  |
| C | 24.712905 | 9.873798  | 0.201863  |
| C | 24.333962 | 8.532858  | 0.004071  |
| C | 23.801692 | 10.886512 | -0.125483 |
| C | 23.080101 | 8.217745  | -0.502841 |
| C | 22.537587 | 10.586167 | -0.637742 |
| C | 22.168761 | 9.242189  | -0.829465 |
| H | 22.772591 | 7.181762  | -0.660221 |
| H | 21.853176 | 11.397809 | -0.883446 |
| C | 30.548576 | 13.303933 | -0.192797 |
| C | 30.782576 | 13.212619 | -1.577905 |
| C | 31.130318 | 14.360057 | 0.521366  |
| C | 31.575149 | 14.150527 | -2.225785 |
| C | 31.929037 | 15.311665 | -0.116105 |
| C | 32.156589 | 15.210532 | -1.500832 |
| H | 31.765323 | 14.092020 | -3.299506 |
| H | 32.366330 | 16.121066 | 0.467930  |
| O | 20.973414 | 8.838938  | -1.317396 |
| O | 32.911465 | 16.074072 | -2.216674 |
| C | 33.530374 | 17.169202 | -1.562899 |
| H | 34.080984 | 17.721793 | -2.335262 |
| H | 32.786020 | 17.841082 | -1.100968 |
| H | 34.239417 | 16.832224 | -0.786626 |
| C | 20.001399 | 9.807682  | -1.672245 |
| H | 20.365039 | 10.475432 | -2.472766 |
| H | 19.127882 | 9.252608  | -2.038320 |
| H | 19.700856 | 10.420120 | -0.804145 |
| H | 25.044041 | 7.743475  | 0.257250  |
| H | 24.097859 | 11.926460 | 0.024712  |
| H | 30.948999 | 14.430102 | 1.595487  |
| H | 30.329186 | 12.390335 | -2.134323 |

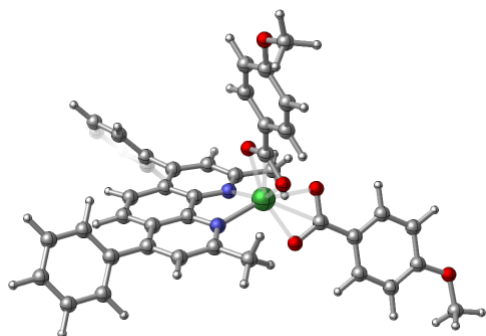

Zero-point correction= 0.665275 (Hartree/Particle)  
 Thermal correction to Energy= 0.710426  
 Thermal correction to Enthalpy= 0.711370  
 Thermal correction to Gibbs Free Energy= 0.579549  
 Sum of electronic and zero-point Energies= -3688.052201  
 Sum of electronic and thermal Energies= -3688.007051  
 Sum of electronic and thermal Enthalpies= -3688.006107  
 Sum of electronic and thermal Free Energies= -3688.137928

uB3LYP-d3/def2-tzvpp-CPCM(THF)//uB3LYP-d3/def2-svp-CPCM(THF)

E(scf) = -3691.318509 a.u.

uPBE0-d3/def2-tzvpp-CPCM(THF)//uB3LYP-d3/def2-svp-CPCM(THF)

E(scf) = -3688.494744 a.u.

**<sup>3</sup>(L4)Ni(OCO-*p*-CNPh)<sub>2</sub>**

E(scf) = -3644.18076190 a.u.

$\nu_{\min} = 6.04 \text{ cm}^{-1}$

|    |           |           |          |
|----|-----------|-----------|----------|
| Ni | 27.904666 | 10.539544 | 1.742665 |
| O  | 29.057073 | 12.238568 | 2.192939 |
| O  | 26.573784 | 9.321887  | 0.668728 |
| O  | 26.100133 | 11.452672 | 0.932595 |
| O  | 28.978934 | 11.508852 | 0.120558 |
| N  | 29.127625 | 8.910447  | 2.204508 |
| N  | 27.372302 | 10.253657 | 3.735672 |
| C  | 28.014501 | 9.202890  | 4.306080 |
| C  | 28.950368 | 8.470983  | 3.476608 |
| C  | 28.593219 | 7.733800  | 6.184130 |
| H  | 28.501386 | 7.481534  | 7.240164 |
| C  | 25.820374 | 10.319435 | 0.453229 |
| C  | 29.634010 | 7.345989  | 4.006545 |
| C  | 29.453005 | 7.024561  | 5.393968 |
| H  | 30.034801 | 6.211742  | 5.827569 |
| C  | 26.327558 | 10.711588 | 5.828411 |
| H  | 25.639975 | 11.341239 | 6.394920 |
| C  | 27.822904 | 8.825953  | 5.660296 |
| C  | 26.904493 | 9.603261  | 6.434289 |
| C  | 26.565434 | 9.276041  | 7.843683 |
| C  | 29.927657 | 8.239151  | 1.374529 |
| C  | 26.578950 | 11.030092 | 4.475419 |
| C  | 30.627447 | 7.096862  | 1.822173 |

Go to: [\[table of contents\]](#) [\[references\]](#)

|   |           |           |           |
|---|-----------|-----------|-----------|
| H | 31.259792 | 6.559317  | 1.114213  |
| C | 30.499752 | 6.628070  | 3.123043  |
| C | 26.650202 | 10.267242 | 8.838348  |
| H | 27.008348 | 11.265106 | 8.574293  |
| C | 29.375921 | 12.353034 | 0.970228  |
| C | 26.109259 | 7.993256  | 8.200911  |
| H | 26.015356 | 7.220410  | 7.434778  |
| C | 25.850569 | 8.700054  | 10.505039 |
| H | 25.575006 | 8.475662  | 11.538390 |
| C | 25.973011 | 12.244315 | 3.837592  |
| H | 25.493399 | 12.889682 | 4.584930  |
| H | 25.236388 | 11.953136 | 3.074999  |
| H | 26.756165 | 12.803844 | 3.304509  |
| C | 30.032177 | 8.703026  | -0.047699 |
| H | 30.577218 | 7.976866  | -0.664554 |
| H | 30.535499 | 9.679074  | -0.100645 |
| H | 29.023351 | 8.860464  | -0.456880 |
| C | 26.301003 | 9.978806  | 10.159991 |
| H | 26.382821 | 10.756280 | 10.923457 |
| C | 25.751797 | 7.709972  | 9.521186  |
| H | 25.390369 | 6.712092  | 9.781266  |
| C | 31.242659 | 5.409506  | 3.538399  |
| C | 32.663685 | 3.083176  | 4.241236  |
| H | 33.215321 | 2.180833  | 4.516138  |
| C | 30.576314 | 4.308491  | 4.108256  |
| H | 29.495727 | 4.350769  | 4.261664  |
| C | 31.282436 | 3.153766  | 4.453722  |
| H | 30.749786 | 2.303567  | 4.886698  |
| C | 32.629288 | 5.323325  | 3.317457  |
| H | 33.157489 | 6.173245  | 2.878774  |
| C | 33.334834 | 4.170845  | 3.672358  |
| H | 34.413552 | 4.123316  | 3.504586  |
| C | 24.583940 | 10.144503 | -0.379241 |
| C | 23.747018 | 11.242104 | -0.631141 |
| C | 24.263192 | 8.885317  | -0.908482 |
| C | 22.598051 | 11.088914 | -1.402700 |
| C | 23.117291 | 8.717920  | -1.681773 |
| C | 22.279067 | 9.822482  | -1.931439 |
| H | 21.945457 | 11.941111 | -1.600460 |
| H | 22.865290 | 7.739545  | -2.094801 |
| C | 30.236468 | 13.502961 | 0.535469  |
| C | 30.593834 | 13.639847 | -0.814437 |
| C | 30.685241 | 14.442587 | 1.475789  |
| C | 31.392969 | 14.702928 | -1.226895 |
| C | 31.484914 | 15.510598 | 1.077066  |
| C | 31.842210 | 15.643801 | -0.279250 |

Go to: [\[table of contents\]](#) [\[references\]](#)

|   |           |           |           |
|---|-----------|-----------|-----------|
| H | 31.672303 | 14.811933 | -2.276316 |
| H | 31.835610 | 16.243002 | 1.806330  |
| C | 32.667353 | 16.742512 | -0.697151 |
| N | 33.334999 | 17.631036 | -1.034764 |
| C | 21.095448 | 9.656728  | -2.727830 |
| N | 20.137990 | 9.522421  | -3.371609 |
| H | 30.234216 | 12.900833 | -1.531795 |
| H | 30.397420 | 14.321765 | 2.521013  |
| H | 24.013433 | 12.214176 | -0.213673 |
| H | 24.925733 | 8.043109  | -0.704258 |

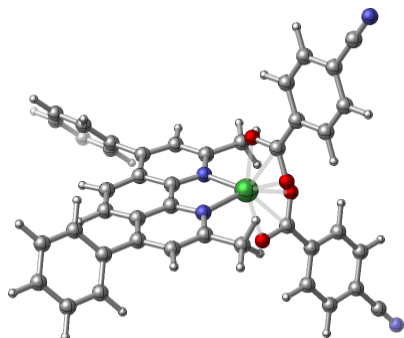

|                                              |                             |
|----------------------------------------------|-----------------------------|
| Zero-point correction=                       | 0.597935 (Hartree/Particle) |
| Thermal correction to Energy=                | 0.641534                    |
| Thermal correction to Enthalpy=              | 0.642478                    |
| Thermal correction to Gibbs Free Energy=     | 0.513653                    |
| Sum of electronic and zero-point Energies=   | -3643.582827                |
| Sum of electronic and thermal Energies=      | -3643.539228                |
| Sum of electronic and thermal Enthalpies=    | -3643.538284                |
| Sum of electronic and thermal Free Energies= | -3643.667109                |

uB3LYP-d3/def2-tzvpp-CPCM(THF)//uB3LYP-d3/def2-svp-CPCM(THF)

E(scf) = -3646.726652 a.u.

uPBE0-d3/def2-tzvpp-CPCM(THF)//uB3LYP-d3/def2-svp-CPCM(THF)

E(scf) = -3643.942127 a.u.

**<sup>3</sup>(L4)Ni(OCO-*p*-NO<sub>2</sub>Ph)<sub>2</sub>**

E(scf) = -3868.53376672 a.u.

$\nu_{\min} = 6.55 \text{ cm}^{-1}$

|    |           |           |          |
|----|-----------|-----------|----------|
| Ni | 27.889479 | 10.500454 | 1.674501 |
| O  | 29.140954 | 12.193797 | 2.052870 |
| O  | 26.476581 | 9.295165  | 0.618701 |
| O  | 26.080597 | 11.456938 | 0.777441 |
| O  | 29.060689 | 11.396123 | 0.000513 |
| N  | 29.035838 | 8.824170  | 2.220856 |
| N  | 27.360083 | 10.325832 | 3.698867 |
| C  | 27.969329 | 9.282853  | 4.317652 |
| C  | 28.860949 | 8.466612  | 3.518334 |
| C  | 28.517862 | 7.898641  | 6.267115 |
| H  | 28.433394 | 7.710081  | 7.336947 |
| C  | 25.764298 | 10.311547 | 0.354421 |



Go to: [\[table of contents\]](#) [\[references\]](#)

|   |           |           |           |
|---|-----------|-----------|-----------|
| C | 29.506468 | 7.345412  | 4.100606  |
| C | 29.335496 | 7.111092  | 5.506733  |
| H | 29.891053 | 6.300936  | 5.978061  |
| C | 26.361402 | 10.939424 | 5.772981  |
| H | 25.705515 | 11.624919 | 6.311520  |
| C | 27.782971 | 8.990233  | 5.693028  |
| C | 26.906404 | 9.845505  | 6.433098  |
| C | 26.576670 | 9.611171  | 7.862975  |
| C | 29.792782 | 8.075861  | 1.417126  |
| C | 26.605454 | 11.171790 | 4.401546  |
| C | 30.452233 | 6.932163  | 1.918178  |
| H | 31.049461 | 6.329322  | 1.232747  |
| C | 30.326513 | 6.543256  | 3.245784  |
| C | 26.712689 | 10.653073 | 8.798386  |
| H | 27.103201 | 11.620333 | 8.473408  |
| C | 29.483287 | 12.245272 | 0.832015  |
| C | 26.079319 | 8.368449  | 8.298389  |
| H | 25.945334 | 7.557733  | 7.578771  |
| C | 25.881715 | 9.213176  | 10.561738 |
| H | 25.613867 | 9.057803  | 11.609686 |
| C | 26.040183 | 12.367862 | 3.696210  |
| H | 25.555539 | 13.057207 | 4.399442  |
| H | 25.319990 | 12.057199 | 2.925549  |
| H | 26.850052 | 12.887072 | 3.160928  |
| C | 29.883690 | 8.460695  | -0.029075 |
| H | 30.414714 | 7.699348  | -0.614668 |
| H | 30.388673 | 9.431059  | -0.139860 |
| H | 28.868665 | 8.601255  | -0.431338 |
| C | 26.373305 | 10.452766 | 10.138724 |
| H | 26.495147 | 11.268371 | 10.855629 |
| C | 25.731845 | 8.173608  | 9.637187  |
| H | 25.338118 | 7.206213  | 9.958325  |
| C | 31.024360 | 5.319182  | 3.718708  |
| C | 32.357320 | 2.976745  | 4.531427  |
| H | 32.874860 | 2.068220  | 4.848927  |
| C | 30.322301 | 4.282953  | 4.362453  |
| H | 29.247630 | 4.381204  | 4.530919  |
| C | 30.984698 | 3.119962  | 4.762385  |
| H | 30.424443 | 2.320060  | 5.252565  |
| C | 32.401538 | 5.159685  | 3.479998  |
| H | 32.957242 | 5.959082  | 2.984065  |
| C | 33.063594 | 3.999531  | 3.889387  |
| H | 34.135866 | 3.895092  | 3.706805  |
| C | 24.522584 | 10.140535 | -0.474201 |
| C | 24.159029 | 8.868565  | -0.943092 |
| C | 23.726496 | 11.255217 | -0.780310 |

Go to: [\[table of contents\]](#) [\[references\]](#)

|   |           |           |           |
|---|-----------|-----------|-----------|
| C | 23.008536 | 8.704173  | -1.711523 |
| C | 22.573205 | 11.107123 | -1.547722 |
| C | 22.233080 | 9.829891  | -2.001156 |
| H | 22.705609 | 7.727467  | -2.086513 |
| H | 21.939683 | 11.956870 | -1.798568 |
| C | 30.411624 | 13.335186 | 0.376246  |
| C | 30.801507 | 13.404704 | -0.970276 |
| C | 30.889082 | 14.282911 | 1.294819  |
| C | 31.663704 | 14.410051 | -1.402478 |
| C | 31.751356 | 15.294758 | 0.877878  |
| C | 32.125297 | 15.340480 | -0.467693 |
| H | 31.980625 | 14.484226 | -2.441888 |
| H | 32.135316 | 16.041420 | 1.571713  |
| N | 33.040309 | 16.408618 | -0.917116 |
| O | 33.428789 | 17.216480 | -0.086429 |
| O | 33.361437 | 16.428671 | -2.096092 |
| N | 21.011995 | 9.664062  | -2.814552 |
| O | 20.730090 | 8.539460  | -3.201132 |
| O | 20.347182 | 10.660064 | -3.058469 |
| H | 24.790706 | 8.014293  | -0.696595 |
| H | 24.026783 | 12.235727 | -0.408590 |
| H | 30.574475 | 14.213662 | 2.336823  |
| H | 30.418226 | 12.660425 | -1.669414 |

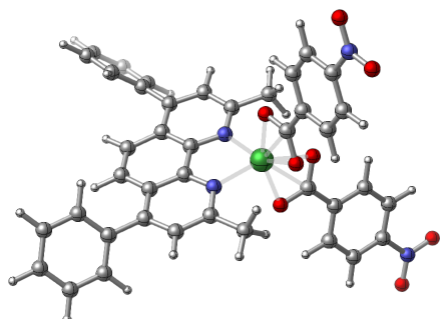

|                                              |                             |
|----------------------------------------------|-----------------------------|
| Zero-point correction=                       | 0.607200 (Hartree/Particle) |
| Thermal correction to Energy=                | 0.652255                    |
| Thermal correction to Enthalpy=              | 0.653199                    |
| Thermal correction to Gibbs Free Energy=     | 0.519129                    |
| Sum of electronic and zero-point Energies=   | -3867.926566                |
| Sum of electronic and thermal Energies=      | -3867.881512                |
| Sum of electronic and thermal Enthalpies=    | -3867.880568                |
| Sum of electronic and thermal Free Energies= | -3868.014638                |

uB3LYP-d3/def2-tzvpp-CPCM(THF)//uB3LYP-d3/def2-svp-CPCM(THF)

E(scf) = -3871.353416 a.u.

uPBE0-d3/def2-tzvpp-CPCM(THF)//uB3LYP-d3/def2-svp-CPCM(THF)

E(scf) = -3868.371495 a.u.

**<sup>3</sup>(L4)Ni(OCOCH<sub>2</sub>CF<sub>3</sub>)<sub>2</sub>**

E(scf) = -3750.18941882 a.u.

n<sub>min</sub> = 15.42 cm<sup>-1</sup>

Go to: [\[table of contents\]](#) [\[references\]](#)

|    |           |           |           |
|----|-----------|-----------|-----------|
| Ni | 27.202747 | 10.241369 | 1.637697  |
| O  | 28.623304 | 11.513333 | 2.532688  |
| O  | 25.777609 | 9.458366  | 0.309546  |
| O  | 25.711045 | 11.580954 | 0.872162  |
| O  | 28.740432 | 11.175404 | 0.360299  |
| N  | 28.482071 | 8.650091  | 1.964087  |
| N  | 26.567716 | 9.649399  | 3.560511  |
| C  | 27.571501 | 8.948055  | 4.152260  |
| C  | 28.616731 | 8.428471  | 3.295115  |
| C  | 28.782962 | 8.040256  | 6.083066  |
| H  | 28.871272 | 7.925786  | 7.163081  |
| C  | 25.244445 | 10.601967 | 0.231909  |
| C  | 29.704967 | 7.710261  | 3.845872  |
| C  | 29.780838 | 7.575374  | 5.272602  |
| H  | 30.654475 | 7.096284  | 5.713870  |
| C  | 25.514779 | 9.861350  | 5.690424  |
| H  | 24.655732 | 10.218931 | 6.259766  |
| C  | 27.624630 | 8.700055  | 5.547691  |
| C  | 26.528155 | 9.167518  | 6.338589  |
| C  | 26.435039 | 8.932673  | 7.803210  |
| C  | 29.347204 | 8.122397  | 1.101527  |
| C  | 25.553044 | 10.100720 | 4.298340  |
| C  | 24.017239 | 10.802831 | -0.642451 |
| C  | 30.464175 | 7.397256  | 1.573794  |
| H  | 31.172165 | 6.993273  | 0.848683  |
| C  | 30.679490 | 7.201753  | 2.929598  |
| C  | 26.185872 | 10.009667 | 8.673344  |
| H  | 26.104663 | 11.020720 | 8.267271  |
| C  | 29.229022 | 11.620878 | 1.429050  |
| C  | 26.542967 | 7.636541  | 8.341283  |
| H  | 26.711123 | 6.787226  | 7.675462  |
| C  | 26.174582 | 8.506049  | 10.573841 |
| H  | 26.075741 | 8.340376  | 11.649430 |
| C  | 24.446099 | 10.845323 | 3.612350  |
| H  | 23.709858 | 11.222666 | 4.333603  |
| H  | 23.932058 | 10.185197 | 2.895775  |
| H  | 24.852269 | 11.679339 | 3.023780  |
| C  | 30.633654 | 12.210695 | 1.424230  |
| C  | 29.124295 | 8.328311  | -0.367206 |
| H  | 29.429003 | 7.435353  | -0.932178 |
| H  | 29.724514 | 9.184031  | -0.709812 |
| H  | 28.069882 | 8.559409  | -0.567122 |
| C  | 26.062897 | 9.797957  | 10.048831 |
| H  | 25.880462 | 10.646343 | 10.712925 |
| C  | 26.410399 | 7.426139  | 9.715844  |
| H  | 26.487418 | 6.412897  | 10.117647 |

Go to: [\[table of contents\]](#) [\[references\]](#)

|   |           |           |           |
|---|-----------|-----------|-----------|
| C | 31.913193 | 6.504184  | 3.377283  |
| C | 34.284391 | 5.202603  | 4.146235  |
| H | 35.205410 | 4.696826  | 4.446424  |
| C | 31.863685 | 5.338845  | 4.162599  |
| H | 30.896384 | 4.928953  | 4.462123  |
| C | 33.042863 | 4.691386  | 4.540680  |
| H | 32.991084 | 3.781206  | 5.143204  |
| C | 33.164979 | 7.006991  | 2.978689  |
| H | 33.206441 | 7.919361  | 2.378812  |
| C | 34.342616 | 6.362139  | 3.365432  |
| H | 35.309045 | 6.768463  | 3.057097  |
| C | 31.670758 | 11.122390 | 1.610785  |
| C | 22.968217 | 9.729647  | -0.459356 |
| F | 32.910009 | 11.636044 | 1.689734  |
| F | 31.672668 | 10.239832 | 0.589171  |
| F | 31.462491 | 10.408277 | 2.736355  |
| F | 21.837311 | 10.053161 | -1.115918 |
| F | 23.358793 | 8.530146  | -0.912269 |
| F | 22.635567 | 9.576928  | 0.843476  |
| H | 23.558772 | 11.773880 | -0.419101 |
| H | 30.750582 | 12.922258 | 2.251571  |
| H | 24.320178 | 10.794353 | -1.700398 |
| H | 30.842453 | 12.707210 | 0.467784  |

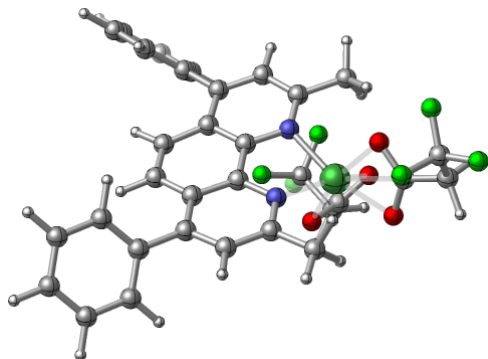

Zero-point correction= 0.505059 (Hartree/Particle)  
Thermal correction to Energy= 0.545287  
Thermal correction to Enthalpy= 0.546231  
Thermal correction to Gibbs Free Energy= 0.426753  
Sum of electronic and zero-point Energies= -3749.684360  
Sum of electronic and thermal Energies= -3749.644132  
Sum of electronic and thermal Enthalpies= -3749.643188  
Sum of electronic and thermal Free Energies= -3749.762666

uB3LYP-d3/def2-tzvpp-CPCM(THF) //uB3LYP-d3/def2-svp-CPCM(THF)  
E(scf) = -3752.928807 a.u.  
uPBE0-d3/def2-tzvpp-CPCM(THF) //uB3LYP-d3/def2-svp-CPCM(THF)  
E(scf) = -3750.18753 a.u.

**<sup>3</sup>(L4)Ni(OCOCH<sub>3</sub>)<sub>2</sub>**  
E(scf) = -3076.59768213 a.u.

$v_{\min} = 11.78 \text{ cm}^{-1}$ 

|    |           |           |           |
|----|-----------|-----------|-----------|
| Ni | 27.451853 | 10.419779 | 1.658181  |
| O  | 28.205297 | 12.312254 | 2.155464  |
| O  | 26.442178 | 8.931642  | 0.580982  |
| O  | 25.495509 | 10.891529 | 0.855765  |
| O  | 28.334789 | 11.615154 | 0.079237  |
| N  | 28.998735 | 9.080422  | 2.131905  |
| N  | 27.004378 | 10.022204 | 3.668598  |
| C  | 27.871407 | 9.152264  | 4.244170  |
| C  | 28.937323 | 8.632148  | 3.410596  |
| C  | 28.784140 | 7.877509  | 6.132873  |
| H  | 28.763438 | 7.628929  | 7.193639  |
| C  | 25.471891 | 9.723317  | 0.375119  |
| C  | 29.856236 | 7.690806  | 3.943933  |
| C  | 29.768488 | 7.361053  | 5.338611  |
| H  | 30.520128 | 6.702944  | 5.773638  |
| C  | 25.910157 | 10.272497 | 5.772148  |
| H  | 25.106931 | 10.743281 | 6.340945  |
| C  | 27.784854 | 8.763872  | 5.606489  |
| C  | 26.725813 | 9.329504  | 6.383732  |
| C  | 26.483529 | 8.956837  | 7.802045  |
| C  | 29.907822 | 8.578316  | 1.294749  |
| C  | 26.069779 | 10.617294 | 4.411462  |
| C  | 30.845787 | 7.622647  | 1.744602  |
| H  | 31.567116 | 7.220022  | 1.032020  |
| C  | 30.843906 | 7.162521  | 3.054959  |
| C  | 26.357937 | 9.956920  | 8.783427  |
| H  | 26.483870 | 11.005130 | 8.502098  |
| C  | 28.534383 | 12.512232 | 0.946036  |
| C  | 26.326346 | 7.610624  | 8.181773  |
| H  | 26.397880 | 6.824600  | 7.426696  |
| C  | 25.942318 | 8.277297  | 10.480464 |
| H  | 25.734219 | 8.013199  | 11.520219 |
| C  | 25.218157 | 11.670702 | 3.769756  |
| H  | 24.538563 | 12.136256 | 4.495162  |
| H  | 24.646797 | 11.250912 | 2.930215  |
| H  | 25.875542 | 12.435520 | 3.327042  |
| C  | 29.865506 | 9.011621  | -0.139680 |
| H  | 30.614449 | 8.482420  | -0.742813 |
| H  | 30.010433 | 10.097500 | -0.223467 |
| H  | 28.857687 | 8.816600  | -0.539170 |
| C  | 26.095122 | 9.618548  | 10.113276 |
| H  | 26.011160 | 10.406415 | 10.865818 |
| C  | 26.054725 | 7.275215  | 9.510303  |
| H  | 25.926104 | 6.226105  | 9.787654  |
| C  | 31.839387 | 6.140816  | 3.473580  |

|   |           |           |           |
|---|-----------|-----------|-----------|
| C | 33.740632 | 4.188649  | 4.182217  |
| H | 34.478434 | 3.431695  | 4.459355  |
| C | 31.435909 | 4.931775  | 4.070612  |
| H | 30.374167 | 4.742304  | 4.243299  |
| C | 32.380131 | 3.963072  | 4.419132  |
| H | 32.050452 | 3.025611  | 4.873645  |
| C | 33.208379 | 6.352020  | 3.228412  |
| H | 33.533317 | 7.288050  | 2.767881  |
| C | 34.151860 | 5.385508  | 3.585963  |
| H | 35.212678 | 5.569161  | 3.398737  |
| C | 29.201529 | 13.811855 | 0.559650  |
| H | 30.276092 | 13.740173 | 0.796428  |
| H | 29.094528 | 14.002423 | -0.516358 |
| H | 28.785649 | 14.645087 | 1.143284  |
| C | 24.273560 | 9.247335  | -0.412829 |
| H | 23.604735 | 8.690987  | 0.264722  |
| H | 23.716674 | 10.097077 | -0.829415 |
| H | 24.586986 | 8.560978  | -1.211827 |

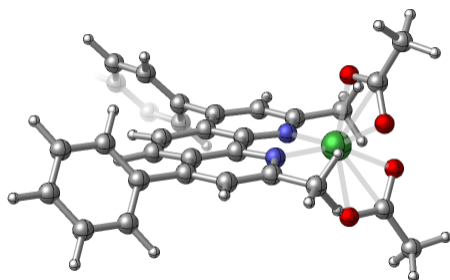

|                                              |                             |
|----------------------------------------------|-----------------------------|
| Zero-point correction=                       | 0.492208 (Hartree/Particle) |
| Thermal correction to Energy=                | 0.526748                    |
| Thermal correction to Enthalpy=              | 0.527692                    |
| Thermal correction to Gibbs Free Energy=     | 0.421467                    |
| Sum of electronic and zero-point Energies=   | -3076.105475                |
| Sum of electronic and thermal Energies=      | -3076.070934                |
| Sum of electronic and thermal Enthalpies=    | -3076.069990                |
| Sum of electronic and thermal Free Energies= | -3076.176215                |

uB3LYP-d3/def2-tzvpp-CPCM(THF)//uB3LYP-d3/def2-svp-CPCM(THF)

E(scf) = -3078.530914 a.u.

uPBE0-d3/def2-tzvpp-CPCM(THF)//uB3LYP-d3/def2-svp-CPCM(THF)

E(scf) = -3076.415625 a.u.

**<sup>3</sup>(L4)Ni(OCOCF<sub>3</sub>)<sub>2</sub>**

E(scf) = -3671.57856784 a.u.

$\nu_{\min} = 5.01 \text{ cm}^{-1}$

|    |           |           |          |
|----|-----------|-----------|----------|
| Ni | 27.445938 | 10.404309 | 1.675092 |
| O  | 28.376331 | 12.269888 | 2.088310 |
| O  | 26.258264 | 8.951067  | 0.679363 |
| O  | 25.499785 | 11.016399 | 0.886714 |
| O  | 28.300960 | 11.531906 | 0.006463 |
| N  | 28.985606 | 9.087095  | 2.111372 |

Go to: [\[table of contents\]](#) [\[references\]](#)

|   |           |           |           |
|---|-----------|-----------|-----------|
| N | 26.978812 | 10.022893 | 3.655044  |
| C | 27.851366 | 9.150532  | 4.225654  |
| C | 28.925835 | 8.644508  | 3.395482  |
| C | 28.767650 | 7.878642  | 6.114345  |
| H | 28.741784 | 7.624814  | 7.173563  |
| C | 25.379073 | 9.829982  | 0.511218  |
| C | 29.859921 | 7.722591  | 3.934866  |
| C | 29.769108 | 7.386389  | 5.326846  |
| H | 30.530903 | 6.742464  | 5.764966  |
| C | 25.852492 | 10.217684 | 5.747109  |
| H | 25.032604 | 10.663746 | 6.311739  |
| C | 27.758220 | 8.749080  | 5.583203  |
| C | 26.682164 | 9.287496  | 6.357239  |
| C | 26.436829 | 8.899011  | 7.770244  |
| C | 29.924956 | 8.617253  | 1.287582  |
| C | 26.018538 | 10.583627 | 4.393202  |
| C | 24.033214 | 9.434723  | -0.133006 |
| C | 30.878554 | 7.683333  | 1.749016  |
| H | 31.619726 | 7.302393  | 1.045257  |
| C | 30.868351 | 7.216199  | 3.055749  |
| C | 26.285528 | 9.889828  | 8.757384  |
| H | 26.393495 | 10.942285 | 8.484657  |
| C | 28.641549 | 12.372928 | 0.866465  |
| C | 26.302529 | 7.547067  | 8.138211  |
| H | 26.393277 | 6.768054  | 7.377970  |
| C | 25.891095 | 8.189816  | 10.438845 |
| H | 25.681379 | 7.914117  | 11.475224 |
| C | 25.118730 | 11.604009 | 3.760993  |
| H | 24.559672 | 12.160777 | 4.524273  |
| H | 24.405013 | 11.121975 | 3.076482  |
| H | 25.710349 | 12.300774 | 3.151076  |
| C | 29.503590 | 13.558325 | 0.382598  |
| C | 29.934653 | 9.074648  | -0.141252 |
| H | 30.571011 | 8.425497  | -0.756646 |
| H | 30.304621 | 10.108120 | -0.215125 |
| H | 28.912111 | 9.082325  | -0.543043 |
| C | 26.020950 | 9.536490  | 10.082858 |
| H | 25.917442 | 10.316877 | 10.840657 |
| C | 26.028225 | 7.197048  | 9.462312  |
| H | 25.917121 | 6.143799  | 9.731173  |
| C | 31.878992 | 6.213650  | 3.482430  |
| C | 33.811004 | 4.298673  | 4.204885  |
| H | 34.560981 | 3.555884  | 4.487478  |
| C | 31.492980 | 4.994881  | 4.071177  |
| H | 30.433562 | 4.782952  | 4.231478  |
| C | 32.452959 | 4.044346  | 4.426223  |

Go to: [\[table of contents\]](#) [\[references\]](#)

|   |           |           |           |
|---|-----------|-----------|-----------|
| H | 32.137638 | 3.098667  | 4.873699  |
| C | 33.245821 | 6.454029  | 3.252316  |
| H | 33.556919 | 7.398129  | 2.798805  |
| C | 34.204592 | 5.505718  | 3.617326  |
| H | 35.263412 | 5.711554  | 3.442626  |
| F | 28.969930 | 14.134000 | -0.702396 |
| F | 29.654839 | 14.496357 | 1.320917  |
| F | 30.727543 | 13.104133 | 0.048427  |
| F | 23.066482 | 9.471728  | 0.804204  |
| F | 24.057392 | 8.204283  | -0.651506 |
| F | 23.694417 | 10.291570 | -1.105384 |

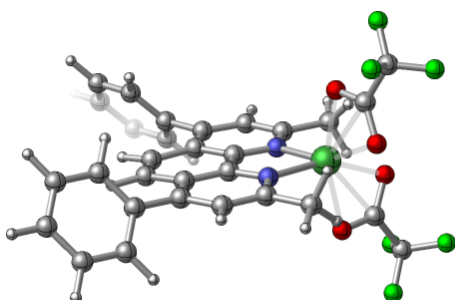

|                                              |                             |
|----------------------------------------------|-----------------------------|
| Zero-point correction=                       | 0.448131 (Hartree/Particle) |
| Thermal correction to Energy=                | 0.486067                    |
| Thermal correction to Enthalpy=              | 0.487011                    |
| Thermal correction to Gibbs Free Energy=     | 0.369887                    |
| Sum of electronic and zero-point Energies=   | -3671.130437                |
| Sum of electronic and thermal Energies=      | -3671.092501                |
| Sum of electronic and thermal Enthalpies=    | -3671.091556                |
| Sum of electronic and thermal Free Energies= | -3671.208681                |

uB3LYP-d3/def2-tzvpp-CPCM(THF)//uB3LYP-d3/def2-svp-CPCM(THF)

E(scf) = -3674.236744 a.u.

uPBE0-d3/def2-tzvpp-CPCM(THF)//uB3LYP-d3/def2-svp-CPCM(THF)

E(scf) = -3671.589829 a.u.

### <sup>2</sup>(L4)NiOCO-*p*-OHPH

E(scf) = -3115.00073138 a.u.

$\nu_{\min} = 9.94 \text{ cm}^{-1}$

|    |           |           |          |
|----|-----------|-----------|----------|
| Ni | 28.958279 | 10.124626 | 2.006238 |
| O  | 30.360096 | 11.457682 | 1.080349 |
| O  | 28.196752 | 11.617350 | 0.716430 |
| N  | 29.857545 | 8.425155  | 2.546330 |
| N  | 27.721851 | 9.646099  | 3.469736 |
| C  | 28.120760 | 8.537514  | 4.160775 |
| C  | 29.286399 | 7.866215  | 3.650146 |
| C  | 27.929858 | 6.810773  | 5.881472 |
| H  | 27.383687 | 6.371566  | 6.716243 |
| C  | 29.769990 | 6.685659  | 4.269984 |
| C  | 29.031218 | 6.166401  | 5.388614 |
| H  | 29.345258 | 5.223988  | 5.837248 |



Go to: [\[table of contents\]](#) [\[references\]](#)

|   |           |           |           |
|---|-----------|-----------|-----------|
| C | 25.923624 | 9.886445  | 5.031120  |
| H | 25.060000 | 10.469866 | 5.355004  |
| C | 27.450082 | 8.038934  | 5.306505  |
| C | 26.312400 | 8.766703  | 5.770644  |
| C | 25.546610 | 8.385237  | 6.984503  |
| C | 30.909063 | 7.817478  | 1.980448  |
| C | 26.632159 | 10.309851 | 3.893619  |
| C | 31.457314 | 6.649688  | 2.544596  |
| H | 32.337720 | 6.205990  | 2.076720  |
| C | 30.928125 | 6.074490  | 3.700488  |
| C | 24.143102 | 8.285217  | 6.933541  |
| H | 23.628272 | 8.448925  | 5.983747  |
| C | 29.380558 | 12.024333 | 0.507514  |
| C | 26.191281 | 8.163262  | 8.217037  |
| H | 27.276753 | 8.264910  | 8.283288  |
| C | 24.060919 | 7.735754  | 9.293122  |
| H | 23.485837 | 7.481924  | 10.187039 |
| C | 26.227255 | 11.520960 | 3.106945  |
| H | 25.341063 | 12.009503 | 3.533280  |
| H | 26.032860 | 11.243862 | 2.059976  |
| H | 27.061787 | 12.237796 | 3.062686  |
| C | 29.618829 | 13.173197 | -0.414688 |
| C | 31.454841 | 8.427306  | 0.722600  |
| H | 32.410755 | 7.973897  | 0.427897  |
| H | 31.565964 | 9.514440  | 0.842576  |
| H | 30.731171 | 8.282748  | -0.098082 |
| C | 23.407955 | 7.959459  | 8.076034  |
| H | 22.319938 | 7.876680  | 8.014138  |
| C | 25.454554 | 7.842448  | 9.359828  |
| H | 25.972019 | 7.681552  | 10.308931 |
| C | 28.759976 | 14.877514 | -1.924534 |
| H | 27.917570 | 15.363382 | -2.425611 |
| C | 31.150410 | 14.714361 | -1.511209 |
| H | 32.159289 | 15.086732 | -1.701424 |
| C | 31.573111 | 4.869631  | 4.283303  |
| C | 28.544597 | 13.804640 | -1.061375 |
| C | 30.067653 | 15.339437 | -2.154646 |
| C | 32.865981 | 2.602448  | 5.349962  |
| H | 33.365301 | 1.723010  | 5.764078  |
| C | 30.922274 | 13.643750 | -0.652164 |
| C | 31.874203 | 3.763060  | 3.467192  |
| H | 31.590797 | 3.781643  | 2.412103  |
| C | 32.510657 | 2.637889  | 3.997197  |
| H | 32.727429 | 1.783842  | 3.350684  |
| C | 31.939414 | 4.823723  | 5.642203  |
| H | 31.737758 | 5.684110  | 6.284079  |

Go to: [\[table of contents\]](#) [\[references\]](#)

|   |           |           |           |
|---|-----------|-----------|-----------|
| C | 32.581428 | 3.700511  | 6.169265  |
| H | 32.865923 | 3.685915  | 7.224345  |
| O | 30.342943 | 16.376333 | -2.980572 |
| H | 27.533037 | 13.439256 | -0.875688 |
| H | 31.755811 | 13.151658 | -0.147675 |
| H | 29.524898 | 16.724738 | -3.363330 |

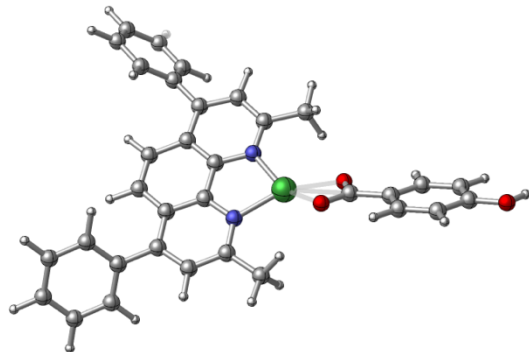

|                                              |                             |
|----------------------------------------------|-----------------------------|
| Zero-point correction=                       | 0.497781 (Hartree/Particle) |
| Thermal correction to Energy=                | 0.531124                    |
| Thermal correction to Enthalpy=              | 0.532068                    |
| Thermal correction to Gibbs Free Energy=     | 0.428705                    |
| Sum of electronic and zero-point Energies=   | -3114.502951                |
| Sum of electronic and thermal Energies=      | -3114.469608                |
| Sum of electronic and thermal Enthalpies=    | -3114.468663                |
| Sum of electronic and thermal Free Energies= | -3114.572027                |

uB3LYP-d3/def2-tzvpp-CPCM(THF)//uB3LYP-d3/def2-svp-CPCM(THF)

E(scf) = -3116.971515 a.u.

uPBE0-d3/def2-tzvpp-CPCM(THF)//uB3LYP-d3/def2-svp-CPCM(THF)

E(scf) = -3114.80757 a.u.

### **<sup>2</sup>(L4)NiOCO-*p*-OMePh**

E(scf) = -3154.27467658 a.u.

$\nu_{\min} = 8.13 \text{ cm}^{-1}$

|    |           |           |          |
|----|-----------|-----------|----------|
| Ni | 28.956738 | 10.122859 | 2.007464 |
| O  | 30.357024 | 11.456370 | 1.077082 |
| O  | 28.192520 | 11.614258 | 0.719458 |
| N  | 29.856799 | 8.424411  | 2.548143 |
| N  | 27.720907 | 9.644603  | 3.472210 |
| C  | 28.120249 | 8.536068  | 4.162966 |
| C  | 29.286068 | 7.865220  | 3.652067 |
| C  | 27.930095 | 6.808997  | 5.883454 |
| H  | 27.384154 | 6.369480  | 6.718211 |
| C  | 29.770136 | 6.684799  | 4.271767 |
| C  | 29.031660 | 6.165131  | 5.390409 |
| H  | 29.346101 | 5.222779  | 5.838887 |
| C  | 25.922832 | 9.884149  | 5.033845 |
| H  | 25.059088 | 10.467266 | 5.357948 |
| C  | 27.449857 | 8.037050  | 5.308681 |
| C  | 26.311964 | 8.764368  | 5.773013 |

Go to: [\[table of contents\]](#) [\[references\]](#)

|   |           |           |           |
|---|-----------|-----------|-----------|
| C | 25.546254 | 8.382320  | 6.986756  |
| C | 30.908480 | 7.817062  | 1.982113  |
| C | 26.631171 | 10.307997 | 3.896315  |
| C | 31.457240 | 6.649490  | 2.546186  |
| H | 32.337737 | 6.206126  | 2.078162  |
| C | 30.928441 | 6.074054  | 3.702133  |
| C | 24.142811 | 8.281607  | 6.935589  |
| H | 23.628026 | 8.445219  | 5.985756  |
| C | 29.375439 | 12.022021 | 0.506932  |
| C | 26.190907 | 8.160480  | 8.219313  |
| H | 27.276323 | 8.262638  | 8.285691  |
| C | 24.060625 | 7.731754  | 9.295072  |
| H | 23.485562 | 7.477507  | 10.188884 |
| C | 26.225665 | 11.519152 | 3.110027  |
| H | 25.340028 | 12.007854 | 3.537329  |
| H | 26.030038 | 11.242057 | 2.063294  |
| H | 27.060304 | 12.235774 | 3.064758  |
| C | 29.610655 | 13.170874 | -0.416265 |
| C | 31.453863 | 8.427133  | 0.724233  |
| H | 32.408961 | 7.972792  | 0.428335  |
| H | 31.566398 | 9.514048  | 0.844848  |
| H | 30.729207 | 8.284226  | -0.095855 |
| C | 23.407689 | 7.955302  | 8.077943  |
| H | 22.319721 | 7.871989  | 8.015903  |
| C | 25.454198 | 7.839137  | 9.361969  |
| H | 25.971624 | 7.678357  | 10.311112 |
| C | 28.741867 | 14.879270 | -1.924482 |
| H | 27.884803 | 15.348373 | -2.407168 |
| C | 31.135120 | 14.709863 | -1.519016 |
| H | 32.141715 | 15.084526 | -1.716673 |
| C | 31.573920 | 4.869417  | 4.284852  |
| C | 28.537168 | 13.803481 | -1.057558 |
| C | 30.049825 | 15.340091 | -2.160559 |
| C | 32.867621 | 2.602630  | 5.351381  |
| H | 33.367249 | 1.723343  | 5.765447  |
| C | 30.914755 | 13.641058 | -0.659987 |
| C | 31.875376 | 3.762980  | 3.468691  |
| H | 31.591917 | 3.781499  | 2.413615  |
| C | 32.512245 | 2.638011  | 3.998628  |
| H | 32.729290 | 1.784066  | 3.352071  |
| C | 31.940299 | 4.823575  | 5.643738  |
| H | 31.738368 | 5.683864  | 6.285659  |
| C | 32.582714 | 3.700563  | 6.170736  |
| H | 32.867242 | 3.686022  | 7.225808  |
| O | 30.361736 | 16.371521 | -2.978658 |
| C | 29.326688 | 17.058380 | -3.661069 |

Go to: [\[table of contents\]](#) [\[references\]](#)

|   |           |           |           |
|---|-----------|-----------|-----------|
| H | 28.616597 | 17.528011 | -2.957982 |
| H | 29.812814 | 17.842596 | -4.255946 |
| H | 28.769098 | 16.387079 | -4.337487 |
| H | 27.526265 | 13.438510 | -0.866828 |
| H | 31.751246 | 13.149270 | -0.160153 |

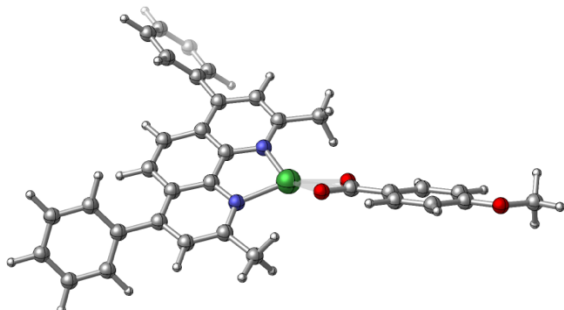

|                                              |                             |
|----------------------------------------------|-----------------------------|
| Zero-point correction=                       | 0.525843 (Hartree/Particle) |
| Thermal correction to Energy=                | 0.560639                    |
| Thermal correction to Enthalpy=              | 0.561583                    |
| Thermal correction to Gibbs Free Energy=     | 0.454519                    |
| Sum of electronic and zero-point Energies=   | -3153.748833                |
| Sum of electronic and thermal Energies=      | -3153.714038                |
| Sum of electronic and thermal Enthalpies=    | -3153.713093                |
| Sum of electronic and thermal Free Energies= | -3153.820157                |

uB3LYP-d3/def2-tzvpp-CPCM(THF)//uB3LYP-d3/def2-svp-CPCM(THF)

E(scf) = -3156.286652 a.u.

uPBE0-d3/def2-tzvpp-CPCM(THF)//uB3LYP-d3/def2-svp-CPCM(THF)

E(scf) = -3154.062022 a.u.

### <sup>2</sup>(L4)NiOCO-*p*-CNPh

E(scf) = -3132.00678353 a.u.

$\nu_{\min} = 7.42 \text{ cm}^{-1}$

|    |           |           |          |
|----|-----------|-----------|----------|
| Ni | 29.013828 | 10.295156 | 2.243682 |
| O  | 30.288074 | 11.460947 | 0.971809 |
| O  | 28.124820 | 11.856020 | 1.082074 |
| N  | 29.847302 | 8.536258  | 2.652675 |
| N  | 27.863884 | 9.834375  | 3.803439 |
| C  | 28.191192 | 8.632688  | 4.356563 |
| C  | 29.273211 | 7.920197  | 3.724151 |
| C  | 27.917615 | 6.763124  | 5.910531 |
| H  | 27.368854 | 6.290444  | 6.724999 |
| C  | 29.673723 | 6.648620  | 4.206892 |
| C  | 28.935722 | 6.081796  | 5.302607 |
| H  | 29.182462 | 5.075285  | 5.640212 |
| C  | 26.175942 | 10.075686 | 5.480743 |
| H  | 25.390990 | 10.699596 | 5.911396 |
| C  | 27.529914 | 8.079488  | 5.482218 |
| C  | 26.488189 | 8.855348  | 6.077564 |
| C  | 25.746156 | 8.418018  | 7.288126 |
| C  | 30.831429 | 7.906360  | 1.995455 |

Go to: [\[table of contents\]](#) [\[references\]](#)

|   |           |           |           |
|---|-----------|-----------|-----------|
| C | 26.869803 | 10.548536 | 4.349955  |
| C | 31.293061 | 6.645233  | 2.419253  |
| H | 32.116736 | 6.180227  | 1.874914  |
| C | 30.752990 | 6.000481  | 3.530917  |
| C | 24.338820 | 8.436414  | 7.298826  |
| H | 23.799432 | 8.733811  | 6.396319  |
| C | 29.269779 | 12.118930 | 0.615377  |
| C | 26.423937 | 8.025417  | 8.458288  |
| H | 27.515999 | 8.031229  | 8.476651  |
| C | 24.313826 | 7.667635  | 9.597367  |
| H | 23.758839 | 7.374740  | 10.492021 |
| C | 26.544513 | 11.868299 | 3.715487  |
| H | 25.787997 | 12.421272 | 4.287839  |
| H | 26.191233 | 11.716769 | 2.684628  |
| H | 27.458314 | 12.474079 | 3.620863  |
| C | 29.422158 | 13.234556 | -0.380875 |
| C | 31.423071 | 8.609969  | 0.810245  |
| H | 32.147276 | 7.977759  | 0.279640  |
| H | 31.909209 | 9.544794  | 1.127000  |
| H | 30.622470 | 8.920430  | 0.122171  |
| C | 23.629274 | 8.059857  | 8.441952  |
| H | 22.536555 | 8.070529  | 8.428795  |
| C | 25.713049 | 7.655431  | 9.602564  |
| H | 26.255605 | 7.361685  | 10.504598 |
| C | 28.437866 | 15.021862 | -1.694997 |
| H | 27.569114 | 15.607669 | -2.000838 |
| C | 30.832080 | 14.561148 | -1.844636 |
| H | 31.812341 | 14.790889 | -2.266260 |
| C | 31.305239 | 4.690280  | 3.961583  |
| C | 28.304140 | 13.986563 | -0.773477 |
| C | 29.706295 | 15.313346 | -2.235217 |
| C | 32.421581 | 2.220038  | 4.735697  |
| H | 32.852398 | 1.261880  | 5.036572  |
| C | 30.683160 | 13.528982 | -0.921922 |
| C | 31.470678 | 3.651479  | 3.026400  |
| H | 31.150083 | 3.803993  | 1.993034  |
| C | 32.019524 | 2.425745  | 3.411520  |
| H | 32.130978 | 1.626956  | 2.674056  |
| C | 31.717436 | 4.472765  | 5.290339  |
| H | 31.621416 | 5.276946  | 6.023219  |
| C | 32.272062 | 3.248803  | 5.672348  |
| H | 32.594312 | 3.100435  | 6.706012  |
| C | 29.851941 | 16.379458 | -3.186002 |
| N | 29.969868 | 17.241891 | -3.955356 |
| H | 27.331636 | 13.744536 | -0.342624 |
| H | 31.541237 | 12.934158 | -0.605970 |

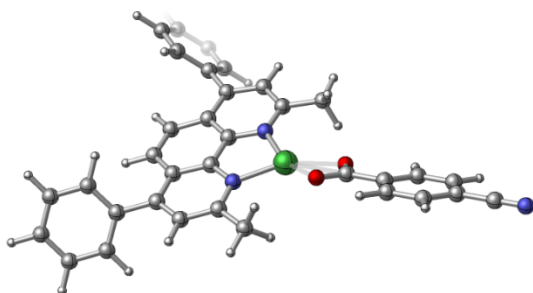

Zero-point correction= 0.492309 (Hartree/Particle)  
 Thermal correction to Energy= 0.526366  
 Thermal correction to Enthalpy= 0.527311  
 Thermal correction to Gibbs Free Energy= 0.421351  
 Sum of electronic and zero-point Energies= -3131.514475  
 Sum of electronic and thermal Energies= -3131.480417  
 Sum of electronic and thermal Enthalpies= -3131.479473  
 Sum of electronic and thermal Free Energies= -3131.585433

uB3LYP-d3/def2-tzvpp-CPCM(THF)//uB3LYP-d3/def2-svp-CPCM(THF)

E(scf) = -3133.992348 a.u.

uPBE0-d3/def2-tzvpp-CPCM(THF)//uB3LYP-d3/def2-svp-CPCM(THF)

E(scf) = -3131.787245 a.u.

**<sup>2</sup>(L4)NiOCO-*p*-NO<sub>2</sub>Ph**

E(scf) = -3244.18347501 a.u.

$\nu_{\min} = 6.73 \text{ cm}^{-1}$

|    |           |           |          |
|----|-----------|-----------|----------|
| Ni | 28.922110 | 10.197231 | 2.127154 |
| O  | 30.272957 | 11.459546 | 0.996647 |
| O  | 28.090602 | 11.750450 | 0.948148 |
| N  | 29.787574 | 8.468222  | 2.581176 |
| N  | 27.750157 | 9.732559  | 3.668246 |
| C  | 28.133971 | 8.578935  | 4.284532 |
| C  | 29.246179 | 7.884320  | 3.686342 |
| C  | 27.950635 | 6.782959  | 5.935031 |
| H  | 27.426521 | 6.329089  | 6.776015 |
| C  | 29.705210 | 6.658378  | 4.230441 |
| C  | 28.998167 | 6.117988  | 5.359497 |
| H  | 29.292314 | 5.143594  | 5.749316 |
| C  | 26.046913 | 9.977486  | 5.329671 |
| H  | 25.229600 | 10.582740 | 5.725338 |
| C  | 27.499400 | 8.054754  | 5.438824 |
| C  | 26.419912 | 8.809289  | 5.993079 |
| C  | 25.699273 | 8.402514  | 7.226855 |
| C  | 30.787839 | 7.845559  | 1.942771 |
| C  | 26.718138 | 10.422739 | 4.174574 |
| C  | 31.309096 | 6.630585  | 2.427851 |
| H  | 32.146798 | 6.172699  | 1.899161 |
| C  | 30.808409 | 6.024792  | 3.579550 |
| C  | 24.292601 | 8.354329  | 7.240005 |

Go to: [\[table of contents\]](#) [\[references\]](#)

|   |           |           |           |
|---|-----------|-----------|-----------|
| H | 23.739680 | 8.576823  | 6.324217  |
| C | 29.255402 | 12.079139 | 0.579897  |
| C | 26.394668 | 8.105724  | 8.414822  |
| H | 27.485185 | 8.164826  | 8.430497  |
| C | 24.303821 | 7.709053  | 9.576367  |
| H | 23.763251 | 7.438218  | 10.486657 |
| C | 26.327926 | 11.686501 | 3.467045  |
| H | 25.511330 | 12.208848 | 3.982713  |
| H | 26.030388 | 11.463629 | 2.431477  |
| H | 27.199898 | 12.352171 | 3.378728  |
| C | 29.426866 | 13.231244 | -0.371466 |
| C | 31.317435 | 8.502975  | 0.702856  |
| H | 32.121659 | 7.916558  | 0.239293  |
| H | 31.673729 | 9.517794  | 0.931352  |
| H | 30.498183 | 8.635220  | -0.022370 |
| C | 23.601617 | 8.006041  | 8.403259  |
| H | 22.509630 | 7.963965  | 8.392107  |
| C | 25.702031 | 7.763803  | 9.578851  |
| H | 26.257851 | 7.544858  | 10.493974 |
| C | 28.453788 | 14.998410 | -1.722142 |
| H | 27.596574 | 15.555208 | -2.098462 |
| C | 30.879178 | 14.675063 | -1.675309 |
| H | 31.865911 | 14.985921 | -2.016170 |
| C | 31.423425 | 4.766832  | 4.075891  |
| C | 28.303208 | 13.930958 | -0.839921 |
| C | 29.743692 | 15.353762 | -2.126824 |
| C | 32.657351 | 2.397098  | 4.975163  |
| H | 33.133774 | 1.477780  | 5.324554  |
| C | 30.711378 | 13.609831 | -0.793532 |
| C | 31.631883 | 3.686946  | 3.197598  |
| H | 31.298883 | 3.767207  | 2.160042  |
| C | 32.239107 | 2.510884  | 3.644926  |
| H | 32.383537 | 1.678686  | 2.951457  |
| C | 31.852253 | 4.641960  | 5.411308  |
| H | 31.722722 | 5.479926  | 6.099819  |
| C | 32.465238 | 3.467803  | 5.855328  |
| H | 32.799498 | 3.391536  | 6.892995  |
| N | 29.912311 | 16.482382 | -3.061136 |
| O | 31.048053 | 16.778773 | -3.403496 |
| O | 28.907607 | 17.063610 | -3.445486 |
| H | 27.313463 | 13.623532 | -0.500149 |
| H | 31.572549 | 13.055204 | -0.418953 |

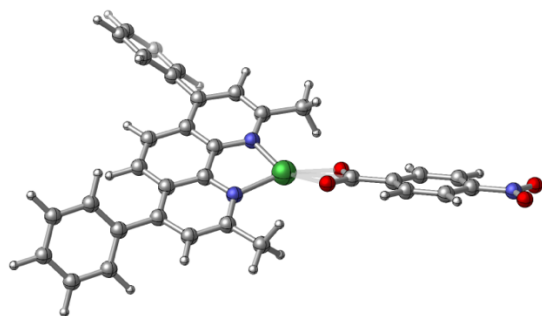

Zero-point correction= 0.496265 (Hartree/Particle)  
 Thermal correction to Energy= 0.531136  
 Thermal correction to Enthalpy= 0.532080  
 Thermal correction to Gibbs Free Energy= 0.423115  
 Sum of electronic and zero-point Energies= -3243.687210  
 Sum of electronic and thermal Energies= -3243.652339  
 Sum of electronic and thermal Enthalpies= -3243.651395  
 Sum of electronic and thermal Free Energies= -3243.760360

uB3LYP-d3/def2-tzvpp-CPCM(THF)//uB3LYP-d3/def2-svp-CPCM(THF)

E(scf) = -3246.305699 a.u.

uPBE0-d3/def2-tzvpp-CPCM(THF)//uB3LYP-d3/def2-svp-CPCM(THF)

E(scf) = -3244.002198 a.u.

**<sup>2</sup>(L4)NiOCOCH<sub>2</sub>CF<sub>3</sub>**

E(scf) = -3185.00760139 a.u.

$\nu_{\min} = 13.20 \text{ cm}^{-1}$

|    |           |           |           |
|----|-----------|-----------|-----------|
| Ni | 29.048556 | 10.415757 | 2.672516  |
| O  | 28.650663 | 12.179670 | 1.943809  |
| O  | 29.032602 | 11.198331 | -0.033851 |
| N  | 29.760060 | 8.620935  | 2.892449  |
| N  | 28.030667 | 9.957794  | 4.348102  |
| C  | 28.267494 | 8.676879  | 4.738922  |
| C  | 29.213349 | 7.940580  | 3.938881  |
| C  | 27.917075 | 6.675627  | 6.097326  |
| H  | 27.385040 | 6.164800  | 6.899801  |
| C  | 29.521934 | 6.593554  | 4.245956  |
| C  | 28.812824 | 5.976716  | 5.334561  |
| H  | 28.979759 | 4.919658  | 5.540949  |
| C  | 26.494454 | 10.167387 | 6.164745  |
| H  | 25.807870 | 10.809506 | 6.718948  |
| C  | 27.635395 | 8.063305  | 5.848236  |
| C  | 26.723104 | 8.864963  | 6.603231  |
| C  | 26.026607 | 8.364819  | 7.816709  |
| C  | 30.644711 | 7.997641  | 2.100402  |
| C  | 27.156036 | 10.697154 | 5.036956  |
| C  | 31.007682 | 6.658721  | 2.343501  |
| H  | 31.746434 | 6.191325  | 1.690257  |
| C  | 30.479108 | 5.934850  | 3.411542  |
| C  | 26.742098 | 7.780365  | 8.879103  |



Go to: [\[table of contents\]](#) [\[references\]](#)

|   |           |           |           |
|---|-----------|-----------|-----------|
| H | 27.827621 | 7.681970  | 8.808979  |
| C | 28.743913 | 12.174886 | 0.666245  |
| C | 24.632810 | 8.513014  | 7.942311  |
| H | 24.064562 | 8.959612  | 7.122884  |
| C | 24.691740 | 7.494044  | 10.140607 |
| H | 24.174097 | 7.154450  | 11.041097 |
| C | 26.938711 | 12.106179 | 4.570476  |
| H | 26.140949 | 12.607421 | 5.134171  |
| H | 26.709476 | 12.115067 | 3.495057  |
| H | 27.872918 | 12.681373 | 4.673813  |
| C | 28.442923 | 13.537678 | 0.030641  |
| C | 31.248049 | 8.809905  | 0.992893  |
| H | 31.814950 | 8.187852  | 0.287190  |
| H | 31.930929 | 9.563840  | 1.421508  |
| H | 30.465658 | 9.372086  | 0.458236  |
| C | 26.079407 | 7.351109  | 10.031560 |
| H | 26.651153 | 6.907688  | 10.850527 |
| C | 23.970813 | 8.076516  | 9.092585  |
| H | 22.886607 | 8.189956  | 9.169156  |
| C | 30.920685 | 4.535193  | 3.641187  |
| C | 31.820521 | 1.892208  | 4.029734  |
| H | 32.167210 | 0.867011  | 4.181265  |
| C | 30.911961 | 3.609683  | 2.580759  |
| H | 30.539572 | 3.919483  | 1.601355  |
| C | 31.353599 | 2.298546  | 2.775023  |
| H | 31.329940 | 1.590556  | 1.942861  |
| C | 31.397149 | 4.115861  | 4.898136  |
| H | 31.437117 | 4.828290  | 5.725068  |
| C | 31.844325 | 2.806199  | 5.088985  |
| H | 32.218687 | 2.500202  | 6.069039  |
| C | 28.729013 | 13.643821 | -1.445685 |
| F | 27.972249 | 12.815232 | -2.185799 |
| F | 28.473367 | 14.898769 | -1.885650 |
| F | 30.017247 | 13.387654 | -1.739840 |
| H | 29.024791 | 14.314265 | 0.547260  |
| H | 27.380106 | 13.776652 | 0.187535  |

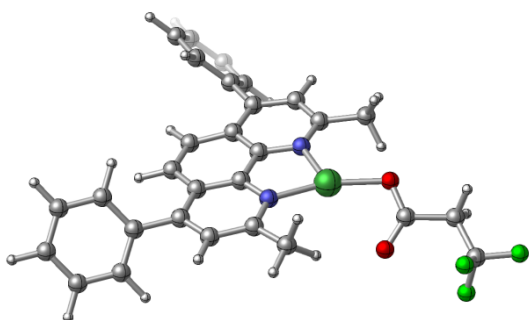

Zero-point correction=

0.445838 (Hartree/Particle)

Go to: [\[table of contents\]](#) [\[references\]](#)

Thermal correction to Energy= 0.478350  
Thermal correction to Enthalpy= 0.479294  
Thermal correction to Gibbs Free Energy= 0.376515  
Sum of electronic and zero-point Energies= -3184.561764  
Sum of electronic and thermal Energies= -3184.529252  
Sum of electronic and thermal Enthalpies= -3184.528308  
Sum of electronic and thermal Free Energies= -3184.631087

uB3LYP-d3/def2-tzvpp-CPCM(THF)//uB3LYP-d3/def2-svp-CPCM(THF)

E(scf) = -3187.09496 a.u.

uPBE0-d3/def2-tzvpp-CPCM(THF)//uB3LYP-d3/def2-svp-CPCM(THF)

E(scf) = -3184.911103 a.u.

**<sup>2</sup>(L4)NiOCOCH<sub>3</sub>**

E(scf) = -2848.21418274 a.u.

$\nu_{\min} = 14.44 \text{ cm}^{-1}$

|    |           |           |           |
|----|-----------|-----------|-----------|
| Ni | 28.633316 | 10.413049 | 2.575055  |
| O  | 28.903632 | 12.521964 | 2.458871  |
| O  | 28.776065 | 11.293078 | 0.641571  |
| N  | 29.359292 | 8.585609  | 2.699941  |
| N  | 27.694064 | 9.886266  | 4.256883  |
| C  | 28.045841 | 8.638256  | 4.678299  |
| C  | 28.963556 | 7.927564  | 3.830277  |
| C  | 27.948797 | 6.691459  | 6.153004  |
| H  | 27.522079 | 6.187028  | 7.019917  |
| C  | 29.400631 | 6.623780  | 4.177379  |
| C  | 28.831828 | 6.019786  | 5.352664  |
| H  | 29.095151 | 4.990315  | 5.595397  |
| C  | 26.265533 | 10.065202 | 6.164555  |
| H  | 25.567998 | 10.679339 | 6.736635  |
| C  | 27.544349 | 8.040330  | 5.862848  |
| C  | 26.635126 | 8.809520  | 6.649941  |
| C  | 26.077433 | 8.327081  | 7.939721  |
| C  | 30.220729 | 7.972644  | 1.868089  |
| C  | 26.798696 | 10.583940 | 4.969460  |
| C  | 30.708280 | 6.686087  | 2.150680  |
| H  | 31.423153 | 6.235693  | 1.459829  |
| C  | 30.332405 | 5.987922  | 3.302177  |
| C  | 26.916831 | 7.853651  | 8.966475  |
| H  | 27.997729 | 7.830714  | 8.811243  |
| C  | 28.900238 | 12.423282 | 1.195628  |
| C  | 24.690673 | 8.380246  | 8.174978  |
| H  | 24.026184 | 8.739697  | 7.385591  |
| C  | 25.001289 | 7.486994  | 10.406783 |
| H  | 24.584262 | 7.159272  | 11.362253 |
| C  | 26.383494 | 11.919620 | 4.425024  |
| H  | 25.826750 | 12.509260 | 5.165852  |
| H  | 25.736264 | 11.769913 | 3.543342  |
| H  | 27.260850 | 12.478337 | 4.069171  |

Go to: [\[table of contents\]](#) [\[references\]](#)

|   |           |           |           |
|---|-----------|-----------|-----------|
| C | 30.654816 | 8.743731  | 0.656868  |
| H | 31.284664 | 8.140245  | -0.010296 |
| H | 31.216029 | 9.640311  | 0.968649  |
| H | 29.778981 | 9.123584  | 0.111773  |
| C | 26.382691 | 7.439179  | 10.188996 |
| H | 27.050140 | 7.082432  | 10.977412 |
| C | 24.157348 | 7.959491  | 9.395838  |
| H | 23.077087 | 7.998330  | 9.556775  |
| C | 30.907864 | 4.644934  | 3.567290  |
| C | 32.064045 | 2.110859  | 4.017669  |
| H | 32.510052 | 1.128738  | 4.193066  |
| C | 30.906207 | 3.662375  | 2.558673  |
| H | 30.438982 | 3.883511  | 1.595989  |
| C | 31.475050 | 2.406318  | 2.783352  |
| H | 31.455008 | 1.653605  | 1.991193  |
| C | 31.509256 | 4.336688  | 4.803263  |
| H | 31.547287 | 5.095504  | 5.587923  |
| C | 32.081967 | 3.081903  | 5.025017  |
| H | 32.550976 | 2.864461  | 5.987954  |
| C | 29.011945 | 13.674474 | 0.351619  |
| H | 28.029801 | 14.175214 | 0.329569  |
| H | 29.729389 | 14.375728 | 0.801330  |
| H | 29.304826 | 13.431312 | -0.678185 |

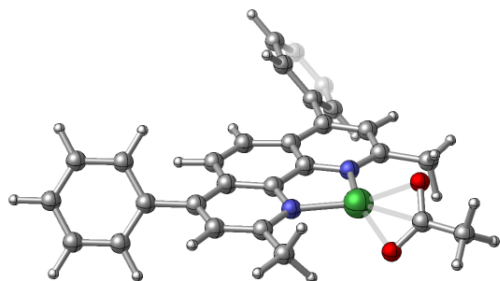

Zero-point correction= 0.439098 (Hartree/Particle)  
Thermal correction to Energy= 0.468731  
Thermal correction to Enthalpy= 0.469675  
Thermal correction to Gibbs Free Energy= 0.374431  
Sum of electronic and zero-point Energies= -2847.775085  
Sum of electronic and thermal Energies= -2847.745452  
Sum of electronic and thermal Enthalpies= -2847.744508  
Sum of electronic and thermal Free Energies= -2847.839752

uB3LYP-d3/def2-tzvpp-CPCM(THF)//uB3LYP-d3/def2-svp-CPCM(THF)  
E(scf) = -2849.892529 a.u.  
uPBE0-d3/def2-tzvpp-CPCM(THF)//uB3LYP-d3/def2-svp-CPCM(THF)  
E(scf) = -2848.022398 a.u.

**<sup>2</sup>(L4)NiOCOCF<sub>3</sub>**

E(scf) = -3145.70657490 a.u.

$\nu_{\min} = 9.44 \text{ cm}^{-1}$

|    |           |           |          |
|----|-----------|-----------|----------|
| Ni | 28.647004 | 10.430908 | 2.605116 |
|----|-----------|-----------|----------|

Go to: [\[table of contents\]](#) [\[references\]](#)

|   |           |           |           |
|---|-----------|-----------|-----------|
| O | 28.678512 | 12.610001 | 2.384585  |
| O | 28.925960 | 11.283117 | 0.626901  |
| N | 29.400742 | 8.595733  | 2.723531  |
| N | 27.722022 | 9.903195  | 4.281009  |
| C | 28.067572 | 8.651976  | 4.693349  |
| C | 28.988292 | 7.937966  | 3.843129  |
| C | 27.949493 | 6.690788  | 6.150506  |
| H | 27.513500 | 6.184022  | 7.011282  |
| C | 29.409123 | 6.628160  | 4.184353  |
| C | 28.831110 | 6.017673  | 5.350399  |
| H | 29.086108 | 4.984551  | 5.585934  |
| C | 26.288388 | 10.071546 | 6.186710  |
| H | 25.591001 | 10.683932 | 6.760718  |
| C | 27.557966 | 8.044765  | 5.868318  |
| C | 26.647532 | 8.811261  | 6.660186  |
| C | 26.081096 | 8.317522  | 7.941839  |
| C | 30.256225 | 7.985450  | 1.892194  |
| C | 26.831135 | 10.600025 | 4.998739  |
| C | 30.734157 | 6.689506  | 2.169446  |
| H | 31.450412 | 6.237889  | 1.481085  |
| C | 30.343455 | 5.991070  | 3.310043  |
| C | 26.914279 | 7.834634  | 8.969098  |
| H | 27.996103 | 7.811799  | 8.820251  |
| C | 28.842226 | 12.410720 | 1.160410  |
| C | 24.693020 | 8.369946  | 8.168132  |
| H | 24.033904 | 8.736834  | 7.377689  |
| C | 24.989448 | 7.457437  | 10.393959 |
| H | 24.566258 | 7.121819  | 11.343939 |
| C | 26.449879 | 11.956300 | 4.483753  |
| H | 25.690437 | 12.435551 | 5.115422  |
| H | 26.066760 | 11.867089 | 3.454656  |
| H | 27.337535 | 12.601321 | 4.411313  |
| C | 30.689017 | 8.748068  | 0.675314  |
| H | 31.437518 | 8.196642  | 0.091281  |
| H | 31.096540 | 9.726545  | 0.972020  |
| H | 29.819327 | 8.975645  | 0.041051  |
| C | 26.372206 | 7.410478  | 10.184716 |
| H | 27.034358 | 7.046577  | 10.974273 |
| C | 24.151936 | 7.938938  | 9.381985  |
| H | 23.070771 | 7.977067  | 9.536596  |
| C | 30.903851 | 4.640425  | 3.572821  |
| C | 32.029304 | 2.094842  | 4.018308  |
| H | 32.463825 | 1.107319  | 4.192024  |
| C | 30.882271 | 3.658683  | 2.564560  |
| H | 30.412369 | 3.885758  | 1.604613  |
| C | 31.435852 | 2.395452  | 2.787527  |

Go to: [\[table of contents\]](#) [\[references\]](#)

|   |           |           |           |
|---|-----------|-----------|-----------|
| H | 31.401022 | 1.641949  | 1.996756  |
| C | 31.507676 | 4.327662  | 4.805801  |
| H | 31.557683 | 5.086433  | 5.589853  |
| C | 32.066708 | 3.066267  | 5.024729  |
| H | 32.539001 | 2.843491  | 5.984732  |
| C | 28.924273 | 13.666888 | 0.263107  |
| F | 27.754346 | 14.331349 | 0.287232  |
| F | 29.877371 | 14.505580 | 0.703453  |
| F | 29.198373 | 13.370717 | -1.012495 |

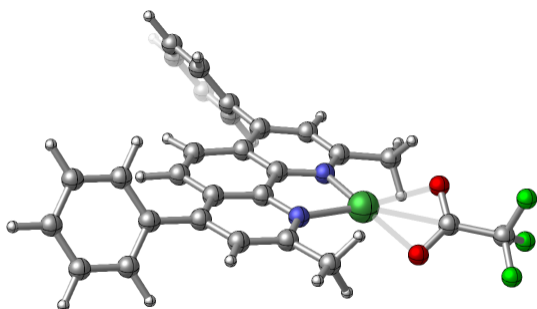

Zero-point correction= 0.417237 (Hartree/Particle)  
Thermal correction to Energy= 0.448649  
Thermal correction to Enthalpy= 0.449593  
Thermal correction to Gibbs Free Energy= 0.348627  
Sum of electronic and zero-point Energies= -3145.289338  
Sum of electronic and thermal Energies= -3145.257926  
Sum of electronic and thermal Enthalpies= -3145.256982  
Sum of electronic and thermal Free Energies= -3145.357948  
uB3LYP-d3/def2-tzvpp-CPCM(THF)//uB3LYP-d3/def2-svp-CPCM(THF)  
E(scf) = -3147.749835 a.u.  
uPBE0-d3/def2-tzvpp-CPCM(THF)//uB3LYP-d3/def2-svp-CPCM(THF)  
E(scf) = -3145.612842 a.u.

### <sup>3</sup>TS3

E(scf) = -5932.22058798 a.u.

$\nu_{\min} = -62.04 \text{ cm}^{-1}$

|    |           |           |          |
|----|-----------|-----------|----------|
| Ni | 27.351093 | 10.310588 | 1.772894 |
| O  | 28.054476 | 13.430539 | 3.687060 |
| O  | 25.776588 | 10.389964 | 0.234526 |
| O  | 25.947022 | 11.930865 | 1.776266 |
| O  | 28.761968 | 12.871076 | 1.690311 |
| N  | 28.743372 | 8.947633  | 1.307021 |
| N  | 27.692635 | 9.661990  | 3.620879 |
| C  | 28.664072 | 8.703561  | 3.671700 |
| C  | 29.221190 | 8.299145  | 2.407184 |
| C  | 30.149008 | 7.110630  | 4.787861 |
| H  | 30.507489 | 6.641197  | 5.703722 |
| C  | 25.276383 | 11.370188 | 0.833156 |
| C  | 30.220643 | 7.295193  | 2.348722 |

Go to: [\[table of contents\]](#) [\[references\]](#)

|   |           |           |           |
|---|-----------|-----------|-----------|
| C | 30.671322 | 6.720196  | 3.585777  |
| H | 31.452262 | 5.960612  | 3.562869  |
| C | 27.483528 | 9.477009  | 5.998304  |
| H | 26.990695 | 9.828756  | 6.906151  |
| C | 29.128893 | 8.118911  | 4.876846  |
| C | 28.529285 | 8.559935  | 6.095980  |
| C | 29.256229 | 8.655823  | 0.106429  |
| C | 27.080855 | 10.017783 | 4.763824  |
| C | 23.861389 | 11.845277 | 0.479993  |
| C | 30.242397 | 7.659042  | -0.036297 |
| H | 30.610638 | 7.425684  | -1.036703 |
| C | 30.728885 | 6.949659  | 1.058788  |
| C | 28.955801 | 12.957696 | 2.938817  |
| C | 25.993952 | 11.041655 | 4.667193  |
| H | 25.529920 | 11.236888 | 5.643108  |
| H | 25.225723 | 10.713352 | 3.950943  |
| H | 26.413083 | 11.972539 | 4.260505  |
| C | 30.324795 | 12.569331 | 3.517759  |
| C | 28.762974 | 9.447308  | -1.068068 |
| H | 28.961834 | 8.933928  | -2.018701 |
| H | 29.278062 | 10.421886 | -1.092173 |
| H | 27.688907 | 9.654950  | -0.966595 |
| C | 30.173022 | 12.012147 | 4.940923  |
| H | 31.164476 | 11.829237 | 5.386141  |
| H | 29.624358 | 12.717127 | 5.581100  |
| H | 29.623373 | 11.061145 | 4.938934  |
| C | 31.001378 | 11.535410 | 2.606421  |
| H | 30.355445 | 10.657027 | 2.482066  |
| H | 31.186444 | 11.950769 | 1.605759  |
| H | 31.961976 | 11.210559 | 3.037829  |
| C | 31.155324 | 13.871562 | 3.554594  |
| H | 30.682157 | 14.620310 | 4.209160  |
| H | 32.168154 | 13.666493 | 3.938481  |
| H | 31.250585 | 14.305159 | 2.546350  |
| C | 22.937289 | 10.611201 | 0.539641  |
| H | 22.922633 | 10.176972 | 1.552680  |
| H | 21.906923 | 10.899773 | 0.277196  |
| H | 23.277008 | 9.835026  | -0.160774 |
| C | 23.376024 | 12.915925 | 1.463786  |
| H | 23.348725 | 12.525631 | 2.492718  |
| H | 24.043927 | 13.784444 | 1.460463  |
| H | 22.362391 | 13.249619 | 1.190769  |
| C | 23.881651 | 12.404748 | -0.957319 |
| H | 24.288566 | 11.661703 | -1.659375 |
| H | 22.858283 | 12.661753 | -1.274273 |
| H | 24.495573 | 13.313680 | -1.022102 |

Go to: [\[table of contents\]](#) [\[references\]](#)

|    |           |           |           |
|----|-----------|-----------|-----------|
| Ni | 26.841045 | 13.818611 | 1.874082  |
| N  | 26.605011 | 14.600222 | 0.005541  |
| N  | 25.698892 | 15.393381 | 2.366899  |
| C  | 25.313222 | 16.143423 | 1.276833  |
| C  | 25.792820 | 15.706684 | 0.003975  |
| C  | 24.042488 | 17.907243 | 0.147537  |
| H  | 23.324205 | 18.725860 | 0.193929  |
| C  | 25.413583 | 16.386583 | -1.191781 |
| C  | 24.493185 | 17.483708 | -1.070550 |
| H  | 24.128572 | 17.970752 | -1.974931 |
| C  | 24.369277 | 16.839259 | 3.744496  |
| H  | 24.022890 | 17.086028 | 4.749500  |
| C  | 24.455163 | 17.277049 | 1.373814  |
| C  | 24.002345 | 17.665344 | 2.663959  |
| C  | 27.053933 | 14.122404 | -1.169528 |
| C  | 25.187535 | 15.722109 | 3.578324  |
| C  | 26.729585 | 14.749335 | -2.379585 |
| H  | 27.136465 | 14.342067 | -3.306378 |
| C  | 25.922726 | 15.896349 | -2.423346 |
| C  | 25.518434 | 14.82067  | 4.729857  |
| H  | 25.103035 | 13.817685 | 4.538228  |
| H  | 25.104285 | 15.199828 | 5.673699  |
| H  | 26.604182 | 14.681364 | 4.819723  |
| C  | 27.919767 | 12.898664 | -1.144604 |
| H  | 28.044294 | 12.476303 | -2.150468 |
| H  | 27.493973 | 12.139495 | -0.477701 |
| H  | 28.90691  | 13.135766 | -0.721027 |
| C  | 25.627377 | 16.527973 | -3.734614 |
| C  | 25.836243 | 17.903767 | -3.953168 |
| C  | 25.172519 | 15.740875 | -4.81033  |
| C  | 25.587044 | 18.474431 | -5.203918 |
| H  | 26.216921 | 18.525381 | -3.139795 |
| C  | 24.919254 | 16.313188 | -6.059337 |
| H  | 25.001038 | 14.672699 | -4.656357 |
| C  | 25.124464 | 17.682673 | -6.260898 |
| H  | 25.7621   | 19.54267  | -5.355123 |
| H  | 24.556545 | 15.686811 | -6.878348 |
| H  | 24.927782 | 18.130497 | -7.238193 |
| C  | 23.162343 | 18.862045 | 2.910034  |
| C  | 23.505163 | 20.125016 | 2.384784  |
| C  | 22.016771 | 18.772145 | 3.72688   |
| C  | 22.724681 | 21.251322 | 2.65625   |
| H  | 24.406693 | 20.22642  | 1.776589  |
| C  | 21.235654 | 19.898341 | 3.9962    |
| H  | 21.728338 | 17.802001 | 4.138773  |
| C  | 21.584702 | 21.143439 | 3.460852  |

Go to: [\[table of contents\]](#) [\[references\]](#)

|   |           |           |           |
|---|-----------|-----------|-----------|
| H | 23.014415 | 22.221253 | 2.243679  |
| H | 20.346047 | 19.801875 | 4.624091  |
| H | 20.974017 | 22.02483  | 3.671945  |
| C | 31.743556 | 5.883805  | 0.850112  |
| C | 31.543852 | 4.579285  | 1.340161  |
| C | 32.909058 | 6.155757  | 0.110108  |
| C | 32.488305 | 3.577816  | 1.101905  |
| H | 30.632108 | 4.34486   | 1.894061  |
| C | 33.855981 | 5.154701  | -0.121369 |
| H | 33.078231 | 7.165338  | -0.272044 |
| C | 33.648971 | 3.862857  | 0.374091  |
| H | 32.313635 | 2.56841   | 1.48252   |
| H | 34.76045  | 5.38603   | -0.689463 |
| H | 34.388697 | 3.079449  | 0.191666  |
| C | 28.977118 | 8.094583  | 7.433114  |
| C | 28.042599 | 7.605716  | 8.364944  |
| C | 30.328931 | 8.183573  | 7.817728  |
| C | 28.449994 | 7.20315   | 9.639417  |
| H | 26.990814 | 7.528143  | 8.079059  |
| C | 30.733846 | 7.785809  | 9.094187  |
| H | 31.062216 | 8.588994  | 7.116867  |
| C | 29.796832 | 7.290718  | 10.008098 |
| H | 27.711898 | 6.816898  | 10.346853 |
| H | 31.785815 | 7.869644  | 9.378323  |
| H | 30.115028 | 6.977238  | 11.005461 |

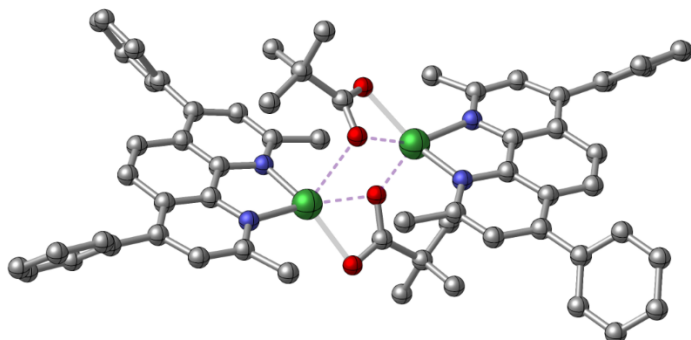

Zero-point correction= 1.051082 (Hartree/Particle)

Thermal correction to Energy= 1.117469

Thermal correction to Enthalpy= 1.118414

Thermal correction to Gibbs Free Energy= 0.944756

Sum of electronic and zero-point Energies= -5931.169506

Sum of electronic and thermal Energies= -5931.103119

Sum of electronic and thermal Enthalpies= -5931.102174

Sum of electronic and thermal Free Energies= -5931.275832

uB3LYP-d3/def2-tzvpp-CPCM(THF)//uB3LYP-d3/def2-svp-CPCM(THF)

E(scf) = -5935.807074 a.u.

uPBE0-d3/def2-tzvpp-CPCM(THF)//uB3LYP-d3/def2-svp-CPCM(THF)



E(scf) = -5931.757066 a.u.

**<sup>3</sup>a\_d**

E(scf) = -5932.22581891 a.u.

$v_{\min} = 7.83 \text{ cm}^{-1}$

|    |           |           |           |
|----|-----------|-----------|-----------|
| Ni | 27.660078 | 10.591774 | 2.152287  |
| O  | 28.349117 | 13.971521 | 3.067584  |
| O  | 26.113701 | 10.514189 | 0.725552  |
| O  | 25.840457 | 12.116018 | 2.205216  |
| O  | 28.621215 | 12.383915 | 1.572715  |
| N  | 28.846555 | 9.037405  | 1.608808  |
| N  | 27.953087 | 9.821684  | 3.959335  |
| C  | 28.771964 | 8.716508  | 3.956843  |
| C  | 29.247783 | 8.288649  | 2.676552  |
| C  | 29.945813 | 6.824368  | 4.969353  |
| H  | 30.174318 | 6.222001  | 5.848656  |
| C  | 25.407374 | 11.435110 | 1.213731  |
| C  | 30.102188 | 7.157642  | 2.550894  |
| C  | 30.397208 | 6.414888  | 3.745194  |
| H  | 30.978295 | 5.495896  | 3.668143  |
| C  | 27.823057 | 9.621148  | 6.347131  |
| H  | 27.440808 | 10.032640 | 7.282921  |
| C  | 29.152034 | 8.014475  | 5.133051  |
| C  | 28.676793 | 8.503675  | 6.383643  |
| C  | 29.284028 | 8.723496  | 0.382832  |
| C  | 27.481766 | 10.258630 | 5.153828  |
| C  | 24.006056 | 11.685466 | 0.638194  |
| C  | 30.130758 | 7.621300  | 0.179126  |
| H  | 30.482126 | 7.406674  | -0.831317 |
| C  | 30.565532 | 6.826599  | 1.246503  |
| C  | 29.055753 | 13.056071 | 2.570627  |
| C  | 26.614162 | 11.478568 | 5.123795  |
| H  | 26.297002 | 11.781898 | 6.130528  |
| H  | 25.728741 | 11.303413 | 4.494056  |
| H  | 27.149783 | 12.312912 | 4.646209  |
| C  | 30.458973 | 12.802743 | 3.139998  |
| C  | 28.859470 | 9.628697  | -0.734778 |
| H  | 29.266447 | 9.309268  | -1.703103 |
| H  | 29.196906 | 10.652880 | -0.513397 |
| H  | 27.761759 | 9.674429  | -0.785484 |
| C  | 31.121357 | 11.601433 | 2.456209  |
| H  | 32.125022 | 11.431067 | 2.877025  |
| H  | 30.521173 | 10.694586 | 2.601044  |
| H  | 31.218506 | 11.763440 | 1.372565  |
| C  | 31.280769 | 14.084268 | 2.884312  |

Go to: [\[table of contents\]](#) [\[references\]](#)

|    |           |           |           |
|----|-----------|-----------|-----------|
| H  | 31.358912 | 14.295707 | 1.805327  |
| H  | 30.811910 | 14.951444 | 3.372153  |
| H  | 32.300989 | 13.964625 | 3.283244  |
| C  | 30.341651 | 12.553805 | 4.655797  |
| H  | 29.774775 | 11.633628 | 4.859184  |
| H  | 31.344113 | 12.442982 | 5.099400  |
| H  | 29.829271 | 13.391165 | 5.151147  |
| C  | 23.342646 | 12.891116 | 1.313308  |
| H  | 23.943752 | 13.796618 | 1.164234  |
| H  | 22.339943 | 13.059398 | 0.889414  |
| H  | 23.243507 | 12.736003 | 2.397810  |
| C  | 24.129396 | 11.927193 | -0.878366 |
| H  | 24.698698 | 12.845494 | -1.083875 |
| H  | 24.641909 | 11.086653 | -1.368213 |
| H  | 23.128751 | 12.038054 | -1.326047 |
| C  | 23.182281 | 10.406012 | 0.897004  |
| H  | 23.099402 | 10.200289 | 1.976751  |
| H  | 22.163833 | 10.524204 | 0.493136  |
| H  | 23.652614 | 9.535942  | 0.415780  |
| Ni | 26.813830 | 13.897036 | 1.621911  |
| N  | 26.531642 | 14.668314 | -0.186627 |
| N  | 25.616358 | 15.443856 | 2.157767  |
| C  | 25.226056 | 16.197757 | 1.089425  |
| C  | 25.718086 | 15.777912 | -0.187155 |
| C  | 23.944562 | 17.970148 | -0.001843 |
| H  | 23.221409 | 18.783911 | 0.053450  |
| C  | 25.344645 | 16.480789 | -1.365174 |
| C  | 24.414845 | 17.570860 | -1.222358 |
| H  | 24.055857 | 18.074409 | -2.119940 |
| C  | 24.292800 | 16.833012 | 3.577469  |
| H  | 23.954693 | 17.058818 | 4.590007  |
| C  | 24.353217 | 17.315054 | 1.209981  |
| C  | 23.899595 | 17.656286 | 2.515494  |
| C  | 26.987991 | 14.216495 | -1.381371 |
| C  | 25.140597 | 15.731241 | 3.375759  |
| C  | 26.670781 | 14.867529 | -2.573903 |
| H  | 27.087433 | 14.478169 | -3.504479 |
| C  | 25.865086 | 16.020263 | -2.608732 |
| C  | 25.548129 | 14.813567 | 4.489426  |
| H  | 25.228083 | 13.789742 | 4.242146  |
| H  | 25.113903 | 15.112905 | 5.452334  |
| H  | 26.644841 | 14.77884  | 4.566912  |
| C  | 27.840046 | 12.985595 | -1.349441 |
| H  | 28.143191 | 12.670011 | -2.356725 |
| H  | 27.297648 | 12.162466 | -0.86043  |
| H  | 28.73383  | 13.153206 | -0.72941  |

Go to: [\[table of contents\]](#) [\[references\]](#)

|   |           |           |           |
|---|-----------|-----------|-----------|
| C | 25.591853 | 16.682993 | -3.906795 |
| C | 25.771761 | 18.070481 | -4.080651 |
| C | 25.189309 | 15.920101 | -5.02165  |
| C | 25.54472  | 18.673162 | -5.320333 |
| H | 26.116141 | 18.677118 | -3.240224 |
| C | 24.960552 | 16.523828 | -6.260355 |
| H | 25.037817 | 14.844014 | -4.906601 |
| C | 25.135191 | 17.9037   | -6.415183 |
| H | 25.697489 | 19.749574 | -5.433592 |
| H | 24.639219 | 15.913585 | -7.108414 |
| H | 24.956448 | 18.37629  | -7.384214 |
| C | 23.027195 | 18.828622 | 2.784004  |
| C | 23.367389 | 20.114178 | 2.320633  |
| C | 21.857779 | 18.679469 | 3.553435  |
| C | 22.557417 | 21.214638 | 2.611889  |
| H | 24.285083 | 20.253117 | 1.744906  |
| C | 21.045404 | 19.779659 | 3.838902  |
| H | 21.577243 | 17.687393 | 3.915403  |
| C | 21.39189  | 21.051124 | 3.368688  |
| H | 22.841843 | 22.206003 | 2.250258  |
| H | 20.135776 | 19.642314 | 4.42899   |
| H | 20.75736  | 21.912039 | 3.593365  |
| C | 31.488626 | 5.692677  | 0.980966  |
| C | 31.183297 | 4.755212  | -0.023768 |
| C | 32.701109 | 5.55441   | 1.683545  |
| C | 32.05602  | 3.701494  | -0.306529 |
| H | 30.244525 | 4.847876  | -0.57523  |
| C | 33.575922 | 4.503748  | 1.395624  |
| H | 32.96801  | 6.288998  | 2.446446  |
| C | 33.255056 | 3.571443  | 0.402773  |
| H | 31.796809 | 2.977298  | -1.082966 |
| H | 34.516125 | 4.416933  | 1.946041  |
| H | 33.938665 | 2.748291  | 0.180515  |
| C | 29.043171 | 7.9054    | 7.689972  |
| C | 30.385808 | 7.641798  | 8.030185  |
| C | 28.04854  | 7.635339  | 8.65149   |
| C | 30.718551 | 7.115561  | 9.28071   |
| H | 31.177248 | 7.875537  | 7.314712  |
| C | 28.381939 | 7.10718   | 9.900924  |
| H | 27.001166 | 7.82722   | 8.405939  |
| C | 29.71844  | 6.842807  | 10.220839 |
| H | 31.766944 | 6.926144  | 9.525306  |
| H | 27.59264  | 6.896592  | 10.627221 |
| H | 29.97958  | 6.430001  | 11.198446 |

Go to: [\[table of contents\]](#) [\[references\]](#)

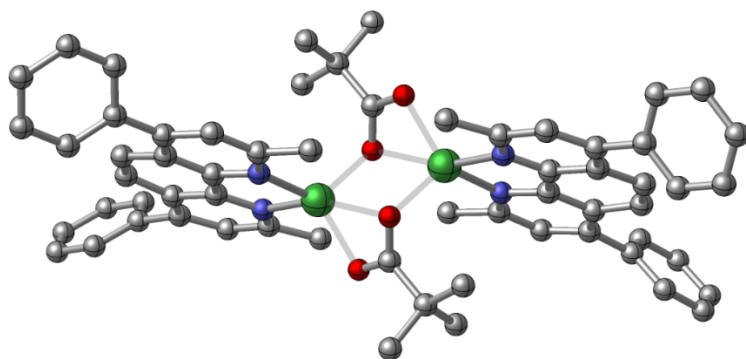

|                                              |                             |
|----------------------------------------------|-----------------------------|
| Zero-point correction=                       | 1.050982 (Hartree/Particle) |
| Thermal correction to Energy=                | 1.118045                    |
| Thermal correction to Enthalpy=              | 1.118989                    |
| Thermal correction to Gibbs Free Energy=     | 0.943236                    |
| Sum of electronic and zero-point Energies=   | -5931.174837                |
| Sum of electronic and thermal Energies=      | -5931.107774                |
| Sum of electronic and thermal Enthalpies=    | -5931.106830                |
| Sum of electronic and thermal Free Energies= | -5931.282583                |

uB3LYP-d3/def2-tzvpp-CPCM(THF)//uB3LYP-d3/def2-svp-CPCM(THF)  
E(scf) = -5935.80595 a.u.  
uPBE0-d3/def2-tzvpp-CPCM(THF)//uB3LYP-d3/def2-svp-CPCM(THF)  
E(scf) = -5931.756809 a.u.

## Supplementary References

1. Yakhvarov, D. G.; Hey-Hawkins, E.; Kagirov, R. M.; Budnikova, Y. H.; Ganushevich, Y. S.; Sinyashin, O. G. Electrocatalytic reduction of aryldichlorophosphines with the (2,2'-bipyridine)nickel complexes. *Russ. Chem. Bull.* **2007**, *56* (5), 935-942.
2. Powers, D. C.; Anderson, B. L.; Nocera, D. G. Two-Electron HCl to H<sub>2</sub> Photocycle Promoted by Ni(II) Polypyridyl Halide Complexes. *J. Am. Chem. Soc.* **2013**, *135* (50), 18876-18883.
3. Eremenko, I. L.; Nefedov, S. E.; Sidorov, A. A.; Golubnichaya, M. A.; Danilov, P. V.; Ikorskii, V. N.; Shvedenkov, Y. G.; Novotortsev, V. M.; Moiseev, I. I. Bi- and Mononuclear Nickel(II) Trimethylacetate Complexes with Pyridine Bases as Ligands. *Inorg. Chem.* **1999**, *38* (17), 3764-3773.
4. Yanagi, T.; Somerville, R. J.; Nogi, K.; Martin, R.; Yorimitsu, H. Ni-Catalyzed Carboxylation of C(sp<sup>2</sup>)-S Bonds with CO<sub>2</sub>: Evidence for the Multifaceted Role of Zn. *ACS Catal.* **2020**, *10* (3), 2117-2123.
5. Tortajada, A.; Ninokata, R.; Martin, R. Ni-Catalyzed Site-Selective Dicarboxylation of 1,3-Dienes with CO<sub>2</sub>. *J. Am. Chem. Soc.* **2018**, *140* (6), 2050-2053.
6. Lin, Q.; Diao, T. Mechanism of Ni-Catalyzed Reductive 1,2-Dicarbofunctionalization of Alkenes. *J. Am. Chem. Soc.* **2019**, *141* (44), 17937-17948.
7. Henne, B. J.; Bartak, D. E. Metal-vapor synthesis and electrochemistry of bis(bipyridyl)nickel(0). *Inorg. Chem.* **1984**, *23* (3), 369-373.
8. Day, C. S.; Do, C. D.; Odena, C.; Benet-Buchholz, J.; Xu, L.; Foroutan-Nejad, C.; Hopmann, K. H.; Martin, R. Room-Temperature-Stable Magnesium Electride via Ni(II) Reduction. *J. Am. Chem. Soc.* **2022**, *144* (29), 13109-13117.
9. Data reduction with CrysAlisPro 1.171.40.35 (Rigaku OD, 2018).
10. Empirical absorption correction using spherical harmonics implemented in Scale3 Abspack scaling algorithm, CrysAlisPro 1.171.40.35 (Rigaku OD, 2018).
11. Data collection with APEX II version v2013.4-1. Bruker (2007). Bruker AXS Inc., Madison, Wisconsin, USA.
12. Data reduction with Bruker SAINT version V8.30c. Bruker (2007). Bruker AXS Inc., Madison, Wisconsin, USA.
13. SADABS: V2012/1 Bruker (2001). Bruker AXS Inc., Madison, Wisconsin, USA. Blessing, *Acta Cryst.* **1995**, *A51*, 33-38.
14. Blessing, R. H. An empirical correction for absorption anisotropy. *Acta Crystallogr A* **1995**, *51* (Pt 1), 33-8.
15. Sheldrick, G. M. SHELXT– Integrated space-group and crystal-structure determination. *Acta Crystallographica Section A Foundations and Advances* **2015**, *71* (1), 3-8.
16. Hübschle, C. B.; Sheldrick, G. M.; Dittrich, B. ShelXle: a Qt graphical user interface for SHELXL. *J. Appl. Crystallogr.* **2011**, *44* (6), 1281-1284.
17. Sheldrick, G. M. Crystal structure refinement with SHELXL. *Acta Crystallogr C Struct Chem* **2015**, *71* (Pt 1), 3-8.
18. Lee, C.; Yang, W.; Parr, R. G. Development of the Colle-Salvetti correlation-energy formula into a functional of the electron density. *Physical Review B* **1988**, *37* (2), 785-789.
19. Becke, A. D. Density-functional thermochemistry. III. The role of exact exchange. *J. Chem. Phys.* **1993**, *98* (7), 5648-5652.
20. Ehrlich, S.; Moellmann, J.; Grimme, S. Dispersion-Corrected Density Functional Theory for Aromatic Interactions in Complex Systems. *Acc. Chem. Res.* **2013**, *46* (4), 916-926.

21. Grimme, S. Density functional theory with London dispersion corrections. *WIREs Computational Molecular Science* **2011**, *1* (2), 211-228.
22. Grimme, S.; Antony, J.; Ehrlich, S.; Krieg, H. A consistent and accurate ab initio parametrization of density functional dispersion correction (DFT-D) for the 94 elements H-Pu. *J. Chem. Phys.* **2010**, *132* (15), 154104.
23. Grimme, S. Accurate description of van der Waals complexes by density functional theory including empirical corrections. *J. Comput. Chem.* **2004**, *25* (12), 1463-1473.
24. Weigend, F.; Ahlrichs, R. Balanced basis sets of split valence, triple zeta valence and quadruple zeta valence quality for H to Rn: Design and assessment of accuracy. *Physical Chemistry Chemical Physics* **2005**, *7* (18), 3297-3305.
25. Weigend, F. Accurate Coulomb-fitting basis sets for H to Rn. *Physical Chemistry Chemical Physics* **2006**, *8* (9), 1057-1065.
26. Klamt, A.; Schüürmann, G. COSMO: a new approach to dielectric screening in solvents with explicit expressions for the screening energy and its gradient. *J. Chem. Soc., Perkin Trans. 2* **1993**, (5), 799-805.
27. Tomasi, J.; Persico, M. Molecular Interactions in Solution: An Overview of Methods Based on Continuous Distributions of the Solvent. *Chem. Rev.* **1994**, *94* (7), 2027-2094.
28. Barone, V.; Cossi, M. Quantum Calculation of Molecular Energies and Energy Gradients in Solution by a Conductor Solvent Model. *J. Phys. Chem. A* **1998**, *102* (11), 1995-2001.
29. Cossi, M.; Rega, N.; Scalmani, G.; Barone, V. Energies, structures, and electronic properties of molecules in solution with the C-PCM solvation model. *J. Comput. Chem.* **2003**, *24* (6), 669-681.
30. Andzelm, J.; Kölmel, C.; Klamt, A. Incorporation of solvent effects into density functional calculations of molecular energies and geometries. *J. Chem. Phys.* **1995**, *103* (21), 9312-9320.
31. Frisch, M. J.; Trucks, G. W.; Schlegel, H. B.; Scuseria, G. E.; Robb, M. A.; Cheeseman, J. R.; Scalmani, G.; Barone, V.; Petersson, G. A.; Nakatsuji, H.; Li, X.; Caricato, M.; Marenich, A. V.; Bloino, J.; Janesko, B. G.; Gomperts, R.; Mennucci, B.; Hratchian, H. P.; Ortiz, J. V.; Izmaylov, A. F.; Sonnenberg, J. L.; Williams; Ding, F.; Lipparini, F.; Egidi, F.; Goings, J.; Peng, B.; Petrone, A.; Henderson, T.; Ranasinghe, D.; Zakrzewski, V. G.; Gao, J.; Rega, N.; Zheng, G.; Liang, W.; Hada, M.; Ehara, M.; Toyota, K.; Fukuda, R.; Hasegawa, J.; Ishida, M.; Nakajima, T.; Honda, Y.; Kitao, O.; Nakai, H.; Vreven, T.; Throssell, K.; Montgomery Jr., J. A.; Peralta, J. E.; Ogliaro, F.; Bearpark, M. J.; Heyd, J. J.; Brothers, E. N.; Kudin, K. N.; Staroverov, V. N.; Keith, T. A.; Kobayashi, R.; Normand, J.; Raghavachari, K.; Rendell, A. P.; Burant, J. C.; Iyengar, S. S.; Tomasi, J.; Cossi, M.; Millam, J. M.; Klene, M.; Adamo, C.; Cammi, R.; Ochterski, J. W.; Martin, R. L.; Morokuma, K.; Farkas, O.; Foresman, J. B.; Fox, D. J. *Gaussian 16 Rev. C.01*, Wallingford, CT, 2016.
32. Hellweg, A.; Hättig, C.; Höfener, S.; Klopper, W. Optimized accurate auxiliary basis sets for RI-MP2 and RI-CC2 calculations for the atoms Rb to Rn. *Theor. Chem. Acc.* **2007**, *117* (4), 587-597.
33. Neese, F. The ORCA program system. *WIREs Computational Molecular Science* **2012**, *2* (1), 73-78.
34. Legault, C. Y. *CYLview, 1.0b*, Université de Sherbrooke: 2009.
35. Wang, M.; England, J.; Weyhermüller, T.; Wieghardt, K. Electronic Structures of “Low-Valent” Neutral Complexes [NiL<sub>2</sub>]<sup>0</sup> (S = 0; L = bpy, phen, tpy) – An Experimental and DFT Computational Study. *Eur. J. Inorg. Chem.* **2015**, *2015* (9), 1511-1523.
